# Supplementary material
Source: PubMed Central journal article supplement (PMC5990278)

**Evolution of a Strategy for the Enantioselective  
Total Synthesis of (+)-Psiguadial B**

Lauren M. Chapman, Jordan C. Beck, Caitlin R. Lacker,  
Linglin Wu, and Sarah E. Reisman\*

*The Warren and Katharine Schlinger Laboratory of Chemistry and Chemical Engineering  
Division of Chemistry and Chemical Engineering, California Institute of Technology  
Pasadena, California 91125  
reisman@caltech.edu*

**Supporting Information**

## Table of contents

|                                                                                                                             |     |
|-----------------------------------------------------------------------------------------------------------------------------|-----|
| 1. Additional optimization studies for Wolff rearrangement/asymmetric ketene addition, Tables S1 and S2 .....               | S3  |
| 2. SFC data for enantioenriched amides <b>18</b> and <b>42–45</b> .....                                                     | S4  |
| 3. Deuteration experiments relevant to epimerization of <i>cis</i> -cyclobutane <b>46</b> .....                             | S9  |
| 4. HPLC separation and stereochemical assignment of cycloadducts <b>57–60</b> .....                                         | S10 |
| 5. Regio- and stereochemical assignment of Norrish–Yang product <b>80</b> .....                                             | S12 |
| 6. Optimization of 1,2-addition and diastereoselectivity model for <b>91</b> , Table S3 .....                               | S13 |
| 7. Overview of successful synthetic scheme .....                                                                            | S14 |
| 8. <sup>1</sup> H and <sup>13</sup> C NMR data comparison tables <b>S4</b> , <b>S5</b> for synthetic (+)-psiguadial B ..... | S15 |
| 9. Single crystal x-ray diffraction data for <b>50</b> .....                                                                | S19 |
| 10. References and notes .....                                                                                              | S31 |
| 11. <sup>1</sup> H and <sup>13</sup> C NMR spectral data .....                                                              | S32 |

**Table S1: Optimization of the Wolff rearrangement for amide 18**

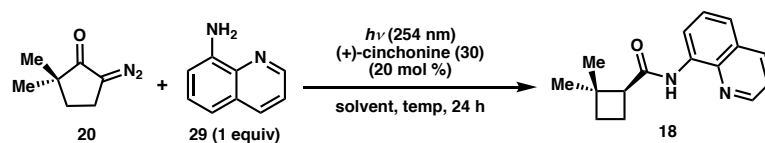

| entry | solvent                         | temp °C | vessel <sup>a</sup> | atm            | % yield <sup>b</sup> | % ee <sup>c</sup> |
|-------|---------------------------------|---------|---------------------|----------------|----------------------|-------------------|
| 1     | THF                             | 25      | quartz              | N <sub>2</sub> | 63                   | 79                |
| 2     | DMF                             | 25      | quartz              | N <sub>2</sub> | 76                   | 50                |
| 3     | CH <sub>2</sub> Cl <sub>2</sub> | 25      | quartz              | N <sub>2</sub> | 62                   | 47                |
| 4     | toluene                         | 25      | quartz              | N <sub>2</sub> | 65                   | 59                |
| 5     | dioxane                         | 25      | quartz              | N <sub>2</sub> | 69                   | 79                |
| 6     | MeCN                            | 25      | quartz              | N <sub>2</sub> | 43                   | 74                |
| 7     | THF                             | 0       | quartz              | N <sub>2</sub> | 28                   | 79                |
| 8     | THF                             | 25      | quartz              | air            | 18                   | 75                |
| 9     | THF                             | 25      | quartz              | CO             | 33                   | 69                |
| 10    | THF                             | 25      | vykor               | N <sub>2</sub> | 29                   | 79                |
| 11    | THF                             | 25      | pyrex               | N <sub>2</sub> | 20                   | 75                |

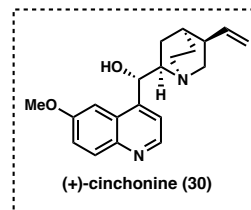

<sup>a</sup> See reference 12 in text of article for discussion of photodecarbonylation.  
<sup>b</sup> Determined by <sup>1</sup>H NMR via integration relative to an added internal standard.  
<sup>c</sup> Determined by SFC using a chiral stationary phase.

**Table S2: Catalyst loading screen for amides 38 and 39**

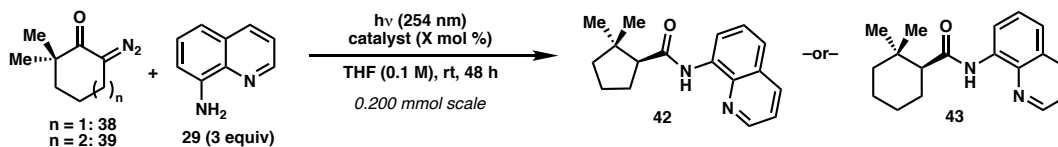

| entry | diazo. | catalyst (mol %) | product | % isolated yield | % ee <sup>a</sup> |
|-------|--------|------------------|---------|------------------|-------------------|
| 1     | 38     | 34 (50)          | 42      | 77               | 71                |
| 2     | 38     | 34 (30)          | 42      | 81               | 69                |
| 3     | 38     | 34 (20)          | 42      | 76               | 67                |
| 4     | 38     | 34 (10)          | 42      | 81               | 63                |
| 5     | 39     | 33 (50)          | 43      | 59               | 71                |
| 6     | 39     | 33 (30)          | 43      | 71               | 66                |
| 7     | 39     | 33 (20)          | 43      | 61               | 62                |
| 8     | 39     | 33 (10)          | 43      | 61               | 55                |

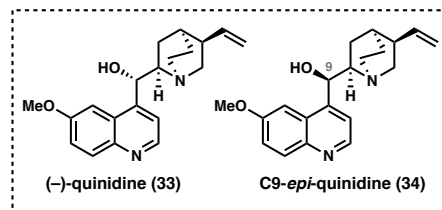

<sup>a</sup> Determined by SFC using a chiral stationary phase.

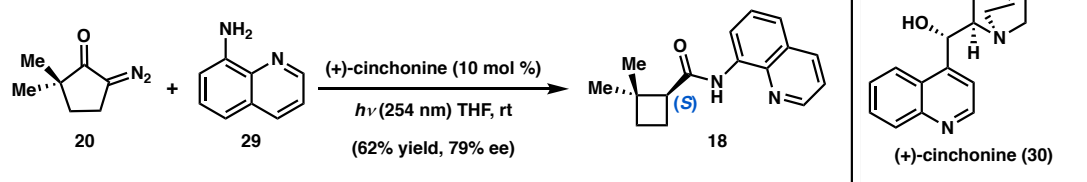

### SFC data for racemic 18:

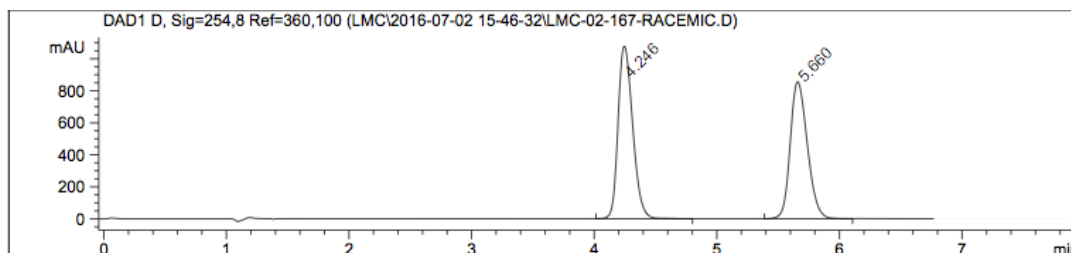

| Peak # | RetTime [min] | Type | Width [min] | Area [mAU*s] | Height [mAU] | Area %  |
|--------|---------------|------|-------------|--------------|--------------|---------|
| 1      | 4.246         | BB   | 0.1286      | 8934.03320   | 1078.74268   | 51.8271 |
| 2      | 5.660         | BB   | 0.1532      | 8304.11426   | 855.84570    | 48.1729 |

### Enantioenriched 18 isolated directly from reaction:

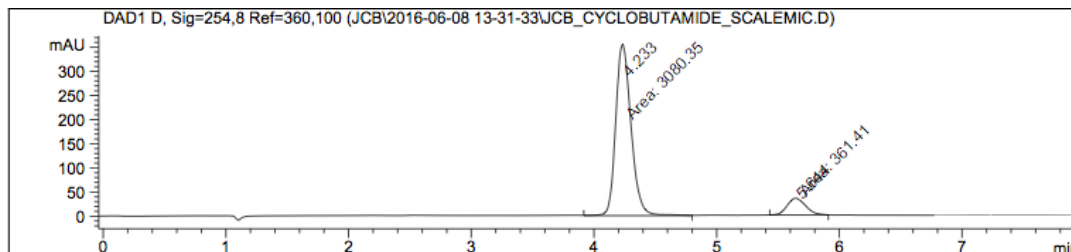

| Peak # | RetTime [min] | Type | Width [min] | Area [mAU*s] | Height [mAU] | Area %  |
|--------|---------------|------|-------------|--------------|--------------|---------|
| 1      | 4.233         | MM   | 0.1444      | 3080.35034   | 355.58780    | 89.4993 |
| 2      | 5.644         | MM   | 0.1739      | 361.41000    | 34.64573     | 10.5007 |

### Enantiopure 18 after a single recrystallization:

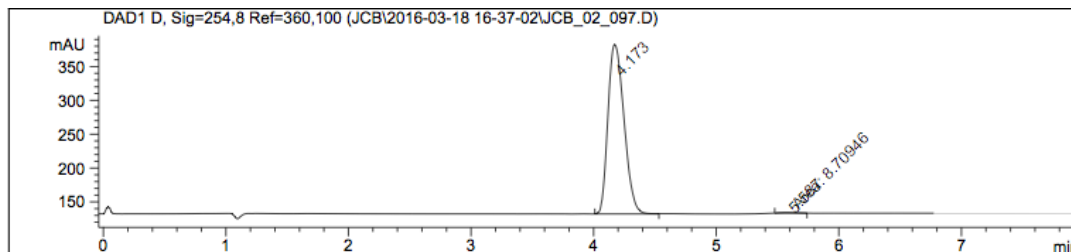

| Peak # | RetTime [min] | Type | Width [min] | Area [mAU*s] | Height [mAU] | Area %  |
|--------|---------------|------|-------------|--------------|--------------|---------|
| 1      | 4.173         | BB   | 0.1464      | 2285.16455   | 250.58836    | 99.6203 |
| 2      | 5.587         | MM   | 0.1518      | 8.70946      | 9.55969e-1   | 0.3797  |

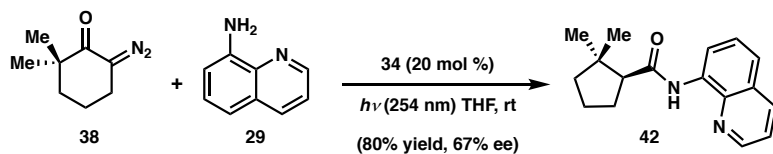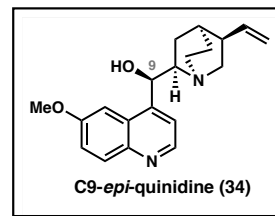

### SFC data for racemic 42:

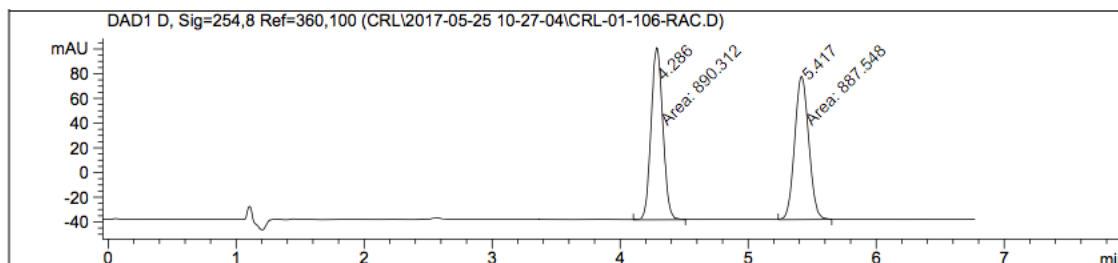

| Peak # | RetTime [min] | Type | Width [min] | Area [mAU*s] | Area %  |
|--------|---------------|------|-------------|--------------|---------|
| 1      | 4.286         | MM   | 0.1063      | 890.31165    | 50.0777 |
| 2      | 5.417         | MM   | 0.1274      | 887.54810    | 49.9223 |

### Enantioenriched 42:

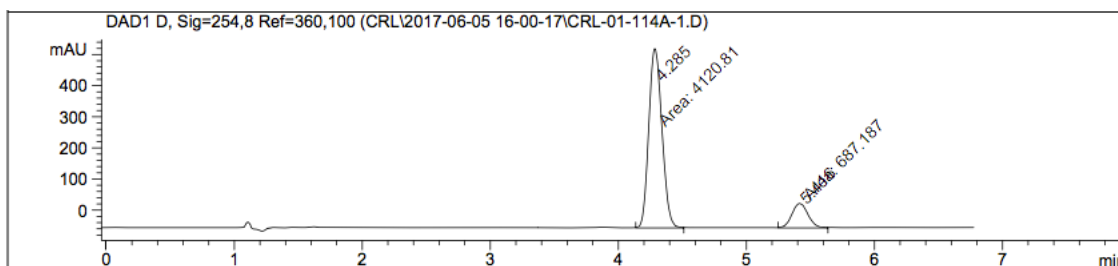

| Peak # | RetTime [min] | Type | Width [min] | Area [mAU*s] | Area %  |
|--------|---------------|------|-------------|--------------|---------|
| 1      | 4.285         | MM   | 0.1189      | 4120.80518   | 85.7074 |
| 2      | 5.416         | MM   | 0.1449      | 687.18732    | 14.2926 |

### Enantioenriched 42 using 20 mol % catalyst loading:

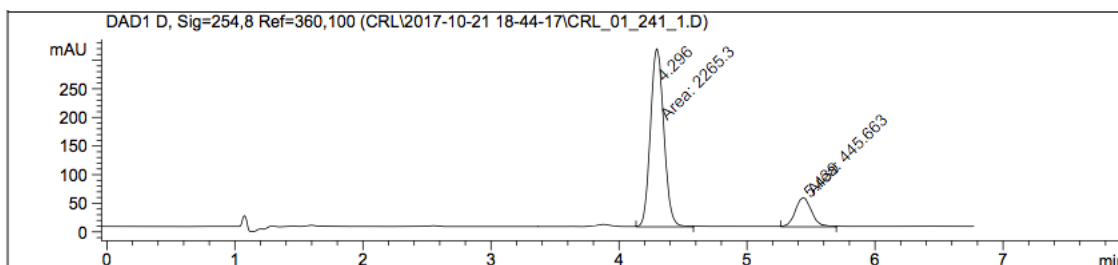

| Peak # | RetTime [min] | Type | Width [min] | Area [mAU*s] | Area %  |
|--------|---------------|------|-------------|--------------|---------|
| 1      | 4.296         | MM   | 0.1212      | 2265.30225   | 83.5607 |
| 2      | 5.439         | MM   | 0.1461      | 445.66309    | 16.4393 |

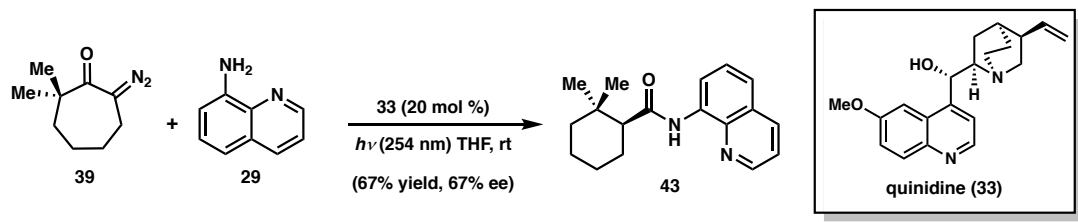

**SFC data for racemic 43 (note – 12 minute run):**

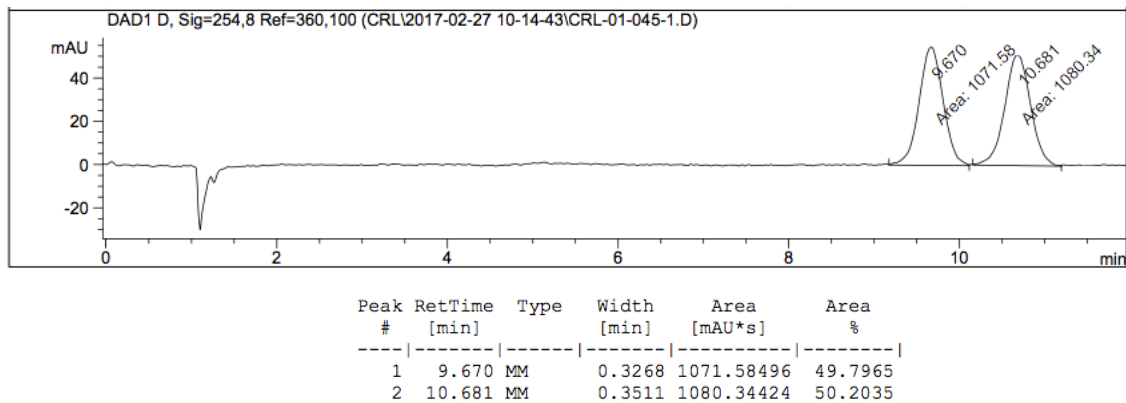

**Enantioenriched 43:**

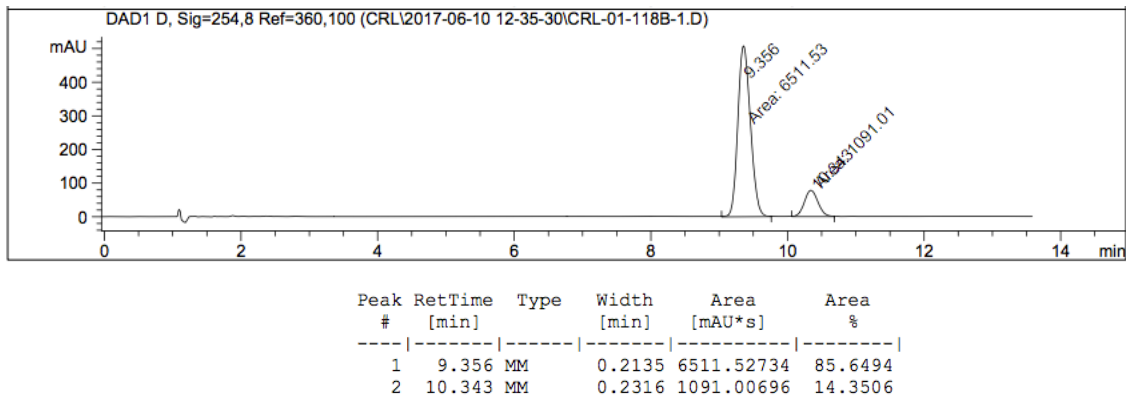

**Enantioenriched 43 using 20 mol % catalyst loading:**

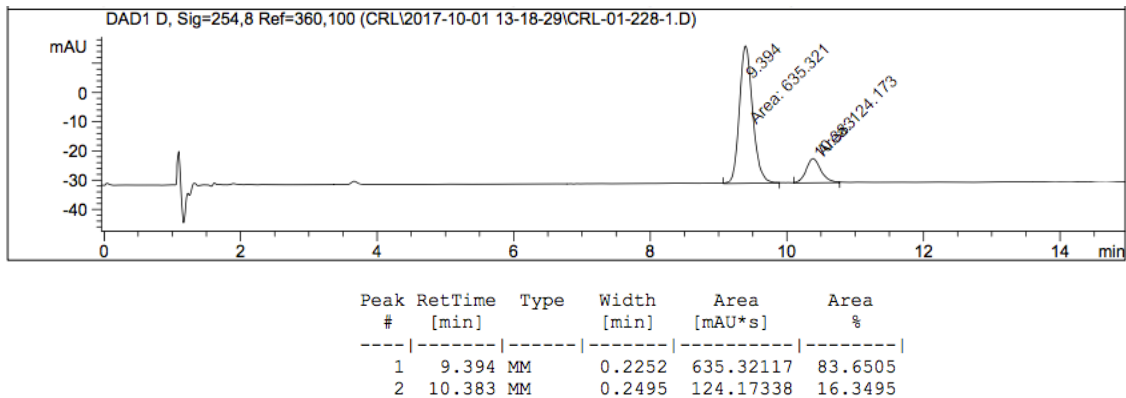

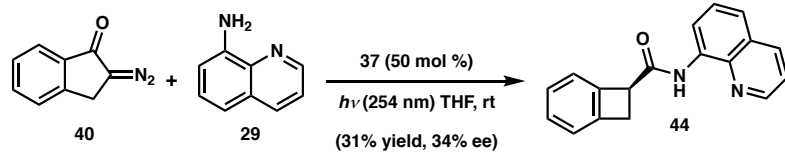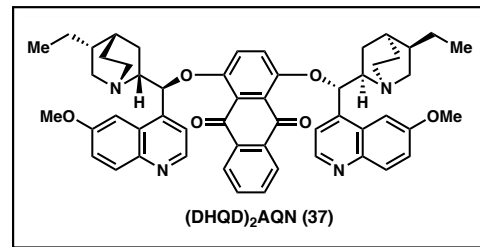

### SFC data for racemic 44:

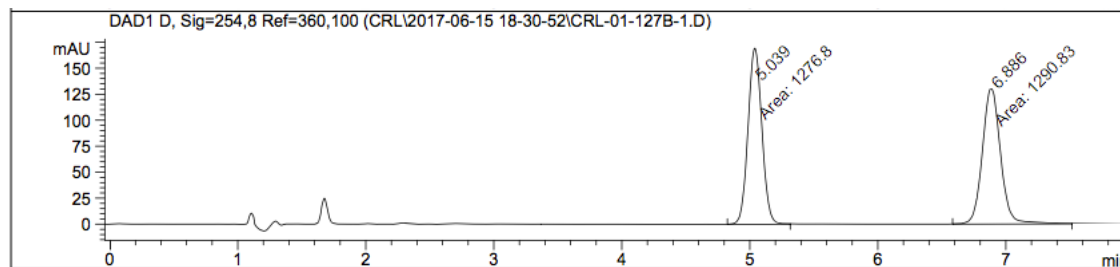

| Peak # | RetTime [min] | Type | Width [min] | Area [mAU*s] | Area %  |
|--------|---------------|------|-------------|--------------|---------|
| 1      | 5.039         | MM   | 0.1254      | 1276.80469   | 49.7268 |
| 2      | 6.886         | MM   | 0.1641      | 1290.83447   | 50.2732 |

### Enantioenriched 44:

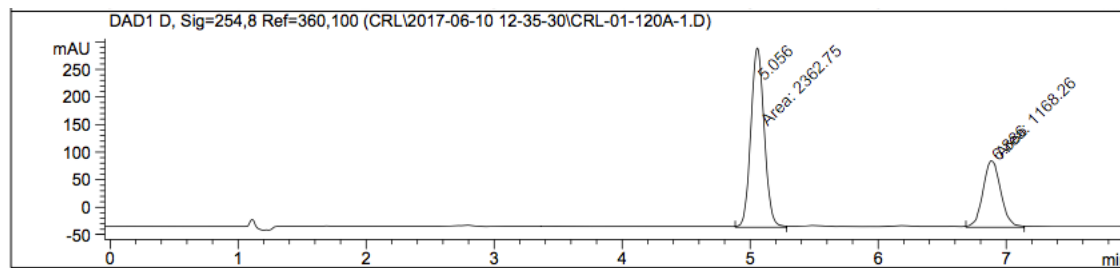

| Peak # | RetTime [min] | Type | Width [min] | Area [mAU*s] | Area %  |
|--------|---------------|------|-------------|--------------|---------|
| 1      | 5.056         | MM   | 0.1210      | 2362.74805   | 66.9143 |
| 2      | 6.886         | MM   | 0.1605      | 1168.25940   | 33.0857 |

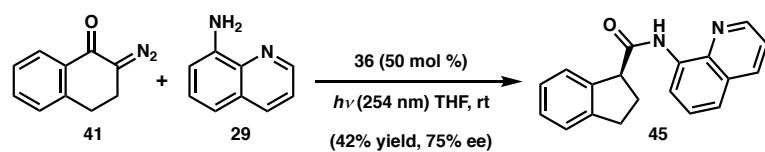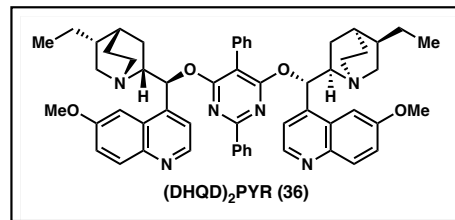

### SFC data for racemic 45:

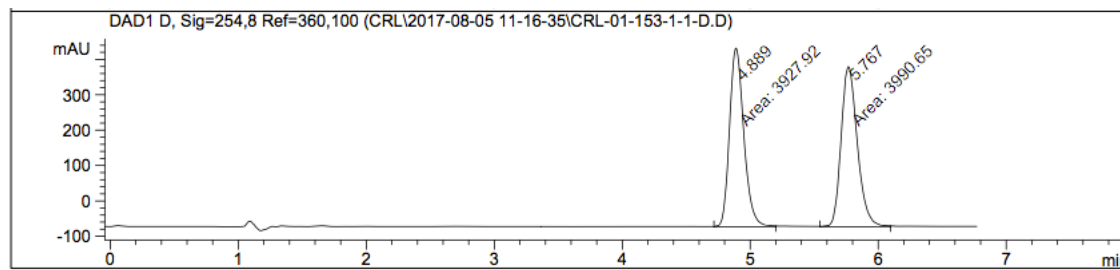

| Peak # | RetTime [min] | Type | Width [min] | Area [mAU*s] | Area %  |
|--------|---------------|------|-------------|--------------|---------|
| 1      | 4.889         | MM   | 0.1294      | 3927.92065   | 49.6039 |
| 2      | 5.767         | MM   | 0.1468      | 3990.65186   | 50.3961 |

### Enantioenriched 45:

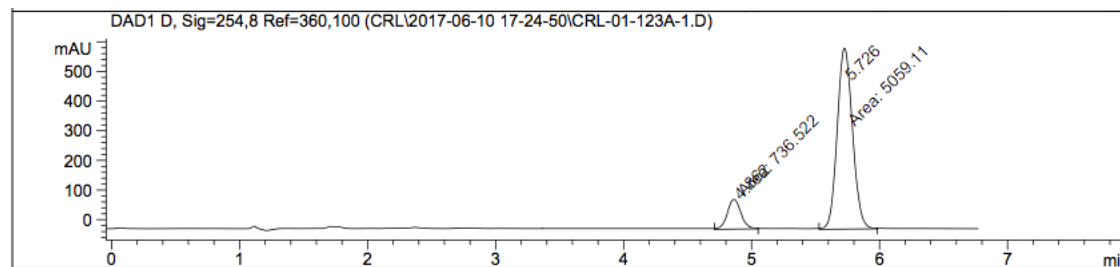

| Peak # | RetTime [min] | Type | Width [min] | Area [mAU*s] | Area %  |
|--------|---------------|------|-------------|--------------|---------|
| 1      | 4.862         | MM   | 0.1218      | 736.52246    | 12.7082 |
| 2      | 5.726         | MM   | 0.1379      | 5059.11182   | 87.2918 |



Deuterium-labeling studies to determine site of epimerization in *trans*-cyclobutane 47:

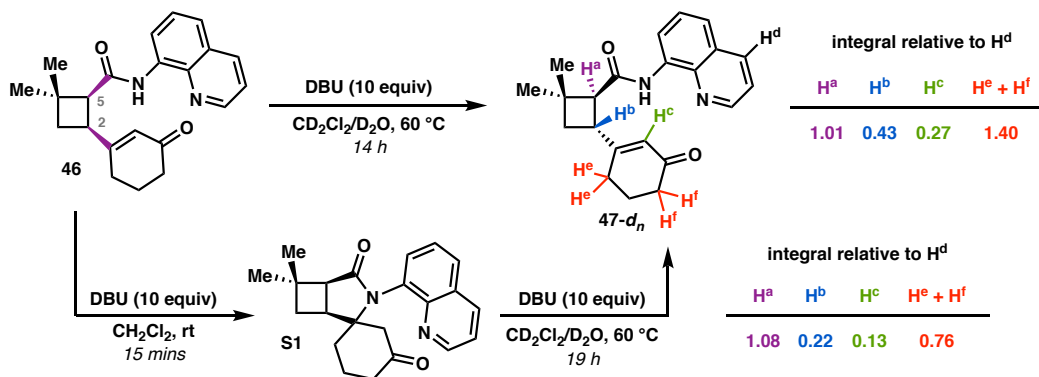

### Preparation of tricyclic ketals 57–60 by thermal cycloaddition:

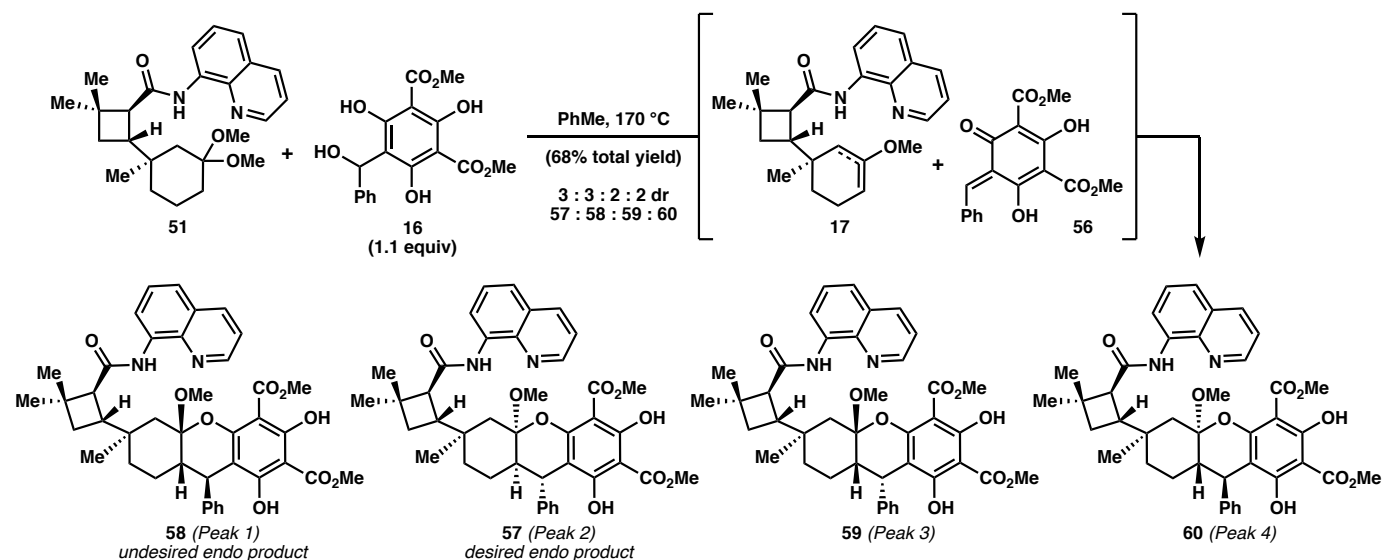

### Chromatogram from HPLC separation of 57–60:

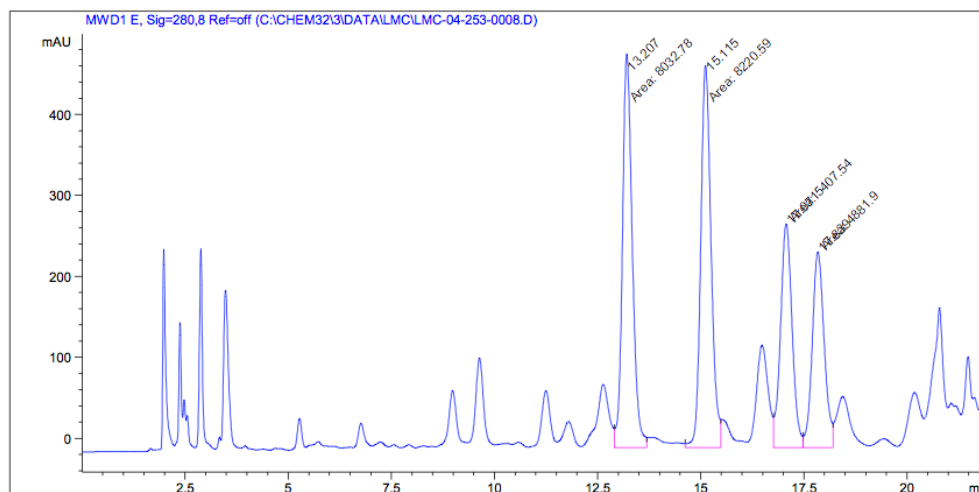

### Chromatogram integration from HPLC separation of 57–60:

| Peak # | RetTime [min] | Type | Width [min] | Area [mAU*s] | Height [mAU] | Area %  |
|--------|---------------|------|-------------|--------------|--------------|---------|
| 1      | 13.207        | MF   | 0.2752      | 8032.78027   | 486.56299    | 30.2635 |
| 2      | 15.115        | MF   | 0.2903      | 8220.58984   | 472.01566    | 30.9711 |
| 3      | 17.071        | MF   | 0.3263      | 5407.54297   | 276.19736    | 20.3729 |
| 4      | 17.839        | MF   | 0.3366      | 4881.89746   | 241.74495    | 18.3925 |

Summary of Key nOe correlations for stereochemical assignment of 57–60:

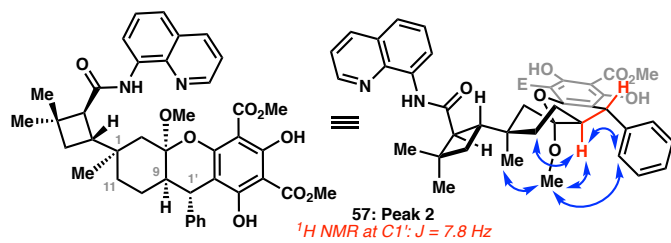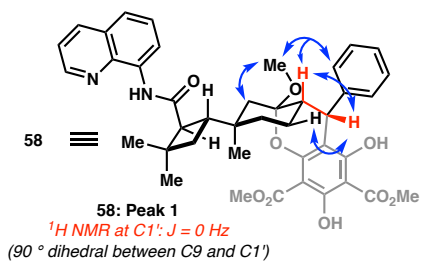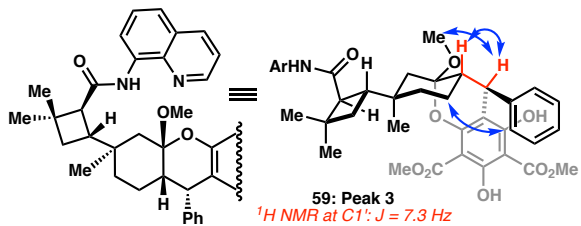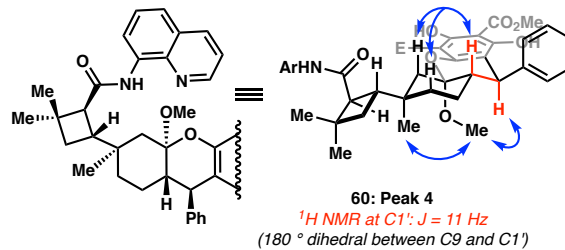

## Regio- and stereochemical assignment of Norrish–Yang product 80:

Key HMBC and nOe correlations:

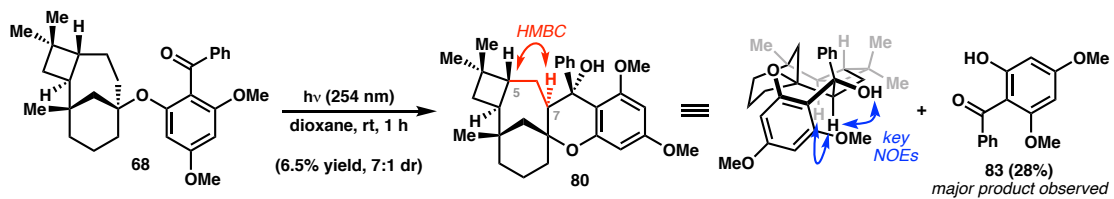

Table S3: Additional experiments toward optimization of 1,2-addition:

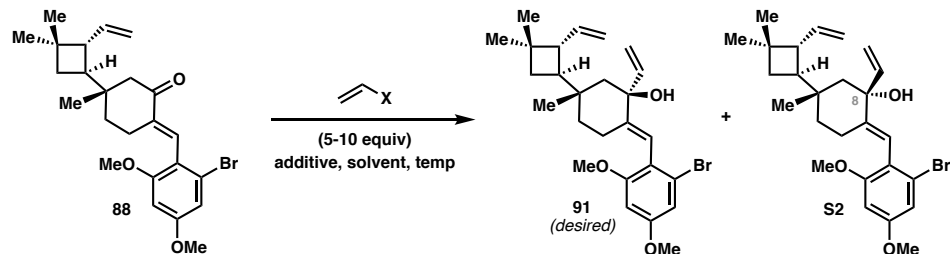

| entry <sup>a</sup> | X    | solvent                         | temp °C | additive                 | % conv. <sup>b</sup> | dr (91:S2) | % total yield (% yield 91) |
|--------------------|------|---------------------------------|---------|--------------------------|----------------------|------------|----------------------------|
| 1                  | MgBr | THF                             | -35     | -                        | 75                   | 2.5:1      | 57 (41)                    |
| 2                  | MgBr | THF                             | -78     | -                        | 56                   | 4.5:1      | 41 (34)                    |
| 3                  | MgBr | Et <sub>2</sub> O               | -35     | -                        | ND                   | 2.5:1      | 57 (41)                    |
| 4                  | MgBr | CH <sub>2</sub> Cl <sub>2</sub> | 0       | -                        | 85                   | 1.9:1      | 69 (45)                    |
| 5                  | MgBr | THF                             | 0       | -                        | 60                   | 2.0:1      | 50 (33)                    |
| 6                  | MgBr | THF                             | -78     | CeCl <sub>3</sub>        | 81                   | 1.6:1      | 66 (41)                    |
| 7                  | MgBr | THF                             | -78     | LaCl <sub>3</sub> ·2LiCl | 100                  | 1.7:1      | 59 (37)                    |
| 8                  | Li   | THF                             | -78     | -                        | 86                   | 2.1:1      | 77 (52)                    |
| 9                  | Li   | THF                             | -78     | La(OTf) <sub>3</sub>     | 94                   | 1.8:1      | 67 (43)                    |
| 10                 | Li   | THF                             | -100    | -                        | 87                   | 1.4:1      | 61 (36)                    |

<sup>a</sup> Test reactions conducted on 0.020 mmol scale. <sup>b</sup> Conversion determined by relative integration of UV LC/MS peaks, detected at 254 nm.

Alternative nucleophiles tested:

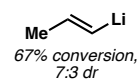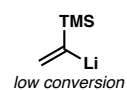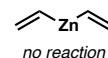

Conformational analysis and diastereoselectivity model for 1,2-addition:

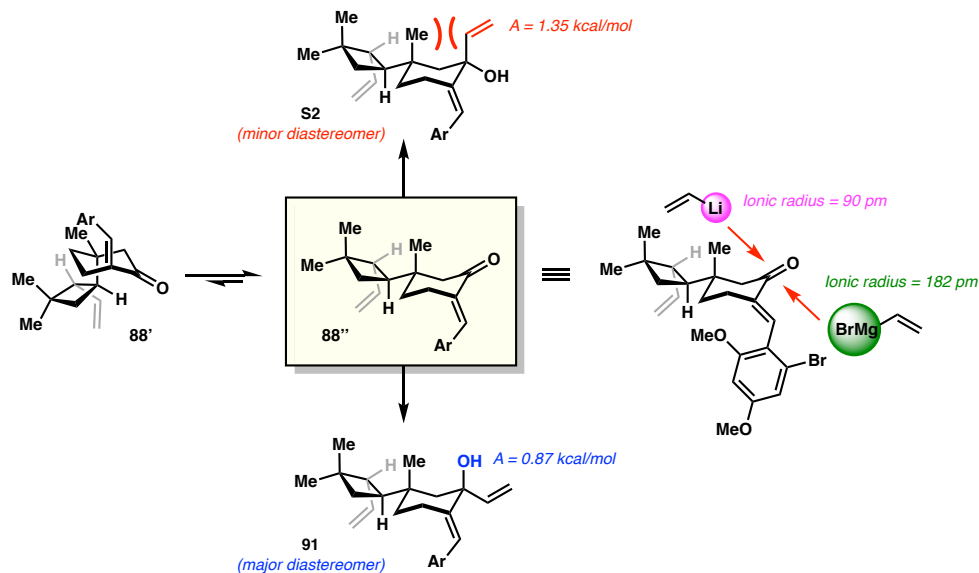

## Overview of the successful route to (+)-psiguadial B:

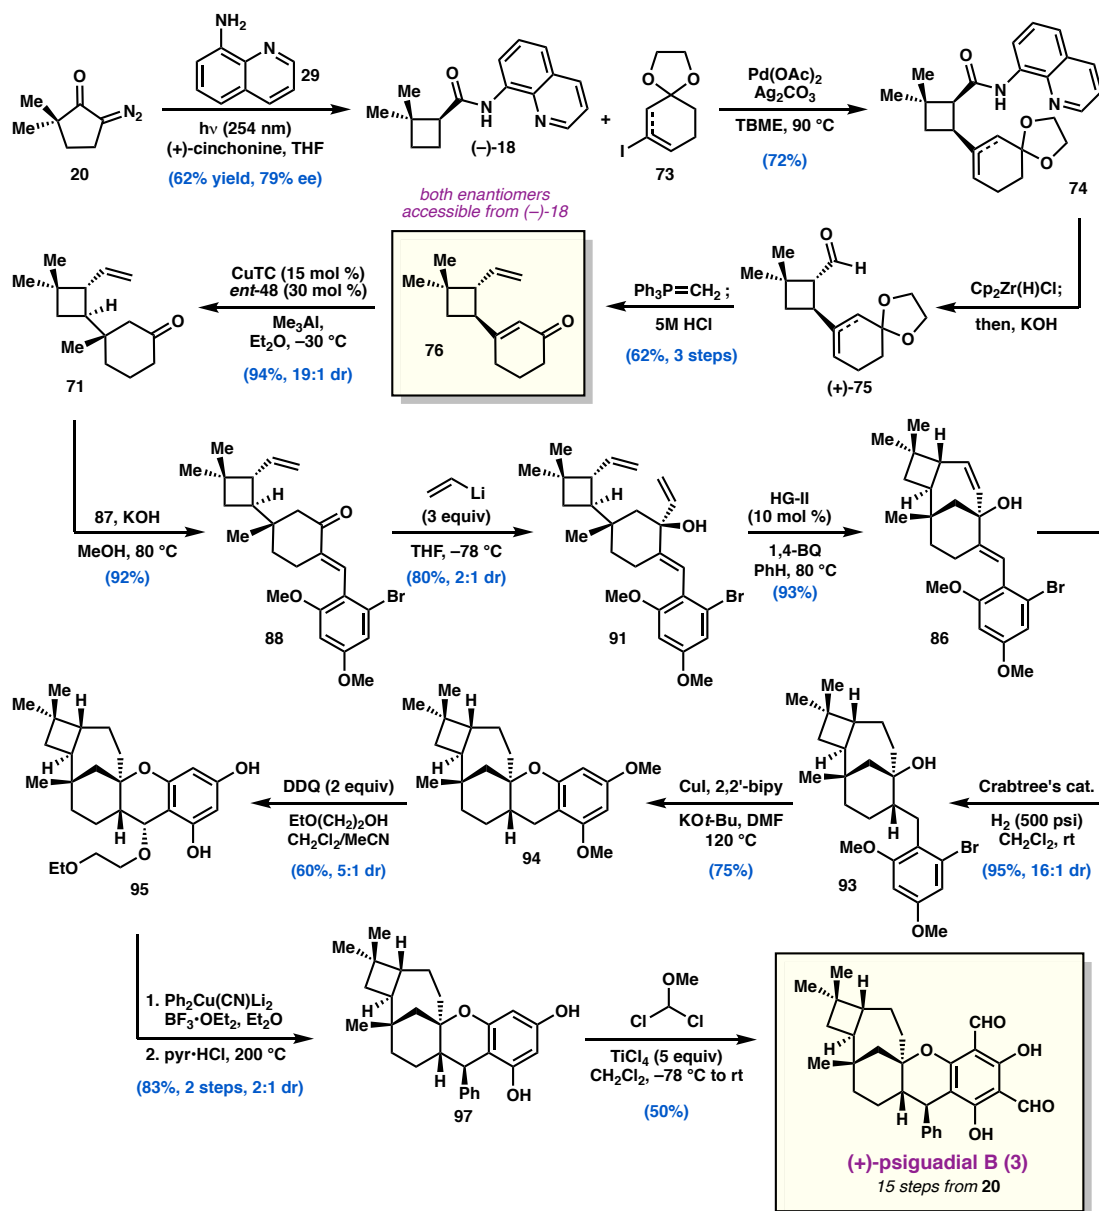

Table S4. Comparison of <sup>1</sup>H NMR spectroscopic data for natural and synthetic (+)-psiguadial B (3)

| carbon number        | Natural (+)-psiguadial B <sup>1</sup><br><sup>1</sup> H NMR, 500 MHz, CDCl <sub>3</sub> | Synthetic (+)-psiguadial B<br><sup>1</sup> H NMR, 400 MHz, CDCl <sub>3</sub> |
|----------------------|-----------------------------------------------------------------------------------------|------------------------------------------------------------------------------|
| 5'-OH                | δ 13.51 (s, 1H)                                                                         | δ 13.51 (s, 1H)                                                              |
| 7'-OH                | 13.04 (s, 1H)                                                                           | 13.04 (s, 1H)                                                                |
| 14', 15'             | 10.08 (s, 2H)                                                                           | 10.07 (s, 2H)                                                                |
| 9', 13' <sup>2</sup> | 7.23 (2H)                                                                               | 7.26 (dd, <i>J</i> = 14.6, 1.5 Hz, 2H)                                       |
| 11'                  | 7.18 (3H)                                                                               | 7.23 – 7.17 (m, 1H)                                                          |
| 10', 12'             | –                                                                                       | 7.10 (br m, 2H)                                                              |
| 1'                   | 3.49 (d, <i>J</i> = 11.5 Hz, 1H)                                                        | 3.49 (d, <i>J</i> = 11.5 Hz, 1H)                                             |
| 2                    | 2.16 (1H)                                                                               | 2.20 – 2.12 (m, 1H)                                                          |
| 12                   | 2.08 (1H)                                                                               | 2.09 (dd, <i>J</i> = 12.7, 2.4 Hz, 1H)                                       |
| 7                    | 1.93 (1H)                                                                               | 1.92 (ddd, <i>J</i> = 14.9, 12.8, 4.2 Hz, 1H)                                |
| 5                    | 1.82 (m, 1H)                                                                            | 1.82 (ddd, <i>J</i> = 12.3, 8.8, 5.6 Hz, 1H)                                 |
| 9                    | 1.68 (1H)                                                                               | 1.73 – 1.59 (m, 3H)                                                          |
| 6                    | 1.65 (1H)                                                                               | –                                                                            |
| 7                    | 1.58 (m, 1H)                                                                            | –                                                                            |
| 3                    | 1.52 (1H)                                                                               | 1.53 – 1.44 (m, 1H)                                                          |
| 10                   | 1.49 (m, 2H)                                                                            | 1.49 (ddd, <i>J</i> = 11.6, 8.1, 2.9 Hz, 2H)                                 |
| 6, 11                | 1.41 (2H)                                                                               | –                                                                            |
| 3                    | 1.37 (1H)                                                                               | 1.44 – 1.29 (m, 4H)                                                          |
| 12                   | 1.29 (1H)                                                                               | –                                                                            |
| 11                   | 1.10 (1H)                                                                               | 1.05 (dd, <i>J</i> = 7.6, 5.8 Hz, 1H)                                        |
| 13                   | 1.02 (s, 3H)                                                                            | 1.02 (s, 3H)                                                                 |
| 14                   | 1.01 (s, 3H)                                                                            | 1.00 (s, 3H)                                                                 |
| 15                   | 0.86 (s, 3H)                                                                            | 0.85 (s, 3H)                                                                 |

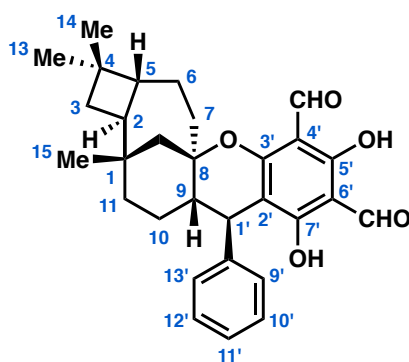

(+)-Psiguadial B (3) carbon numbering as reported by Shao et al.<sup>1</sup>

**Table S5. Comparison of  $^{13}\text{C}$  NMR spectroscopic data for natural and synthetic (+)-psiguadial B (3)**

| <b>carbon number</b> | <b>Natural (+)-psiguadial B<sup>1</sup></b><br>$^{13}\text{C}$ NMR, 125 MHz, $\text{CDCl}_3$ | <b>Synthetic (+)-psiguadial B<sup>3</sup></b><br>$^{13}\text{C}$ NMR, 101 MHz, $\text{CDCl}_3$ | $\Delta$<br>(ppm) |
|----------------------|----------------------------------------------------------------------------------------------|------------------------------------------------------------------------------------------------|-------------------|
| 15'                  | 192.3                                                                                        | 192.3                                                                                          | 0.0               |
| 14'                  | 191.4                                                                                        | 191.5                                                                                          | 0.1               |
| 7'                   | 169.6                                                                                        | 169.6                                                                                          | 0.0               |
| 5'                   | 168.5                                                                                        | 168.5                                                                                          | 0.0               |
| 3'                   | 163.5                                                                                        | 163.5                                                                                          | 0.0               |
| 8'                   | 143.4                                                                                        | 143.4                                                                                          | 0.0               |
| 9', 11', 13'         | 128.2                                                                                        | 128.2                                                                                          | 0.0               |
| 10', 12'             | 126.2                                                                                        | 126.2                                                                                          | 0.0               |
| 2'                   | 105.7                                                                                        | 105.7                                                                                          | 0.0               |
| 4'                   | 104.6                                                                                        | 104.6                                                                                          | 0.0               |
| 6'                   | 104.2                                                                                        | 104.1                                                                                          | -0.1              |
| 8                    | 84.1                                                                                         | 84.1                                                                                           | 0.0               |
| 9                    | 50.0                                                                                         | 50.0                                                                                           | 0.0               |
| 12                   | 47.5                                                                                         | 47.4                                                                                           | -0.1              |
| 5                    | 44.1                                                                                         | 44.0                                                                                           | -0.1              |
| 1'                   | 40.4                                                                                         | 40.4                                                                                           | 0.0               |
| 11                   | 37.6                                                                                         | 37.6                                                                                           | 0.0               |
| 2                    | 37.0                                                                                         | 36.9                                                                                           | -0.1              |
| 3                    | 35.5                                                                                         | 35.4                                                                                           | -0.1              |
| 4                    | 35.1                                                                                         | 35.1                                                                                           | 0.0               |
| 1                    | 33.4                                                                                         | 33.4                                                                                           | 0.0               |
| 13                   | 30.6                                                                                         | 30.6                                                                                           | 0.0               |
| 7                    | 29.4                                                                                         | 29.3                                                                                           | -0.1              |
| 15                   | 26.1                                                                                         | 26.1                                                                                           | 0.0               |
| 10                   | 23.9                                                                                         | 23.9                                                                                           | 0.0               |
| 14                   | 20.7                                                                                         | 20.7                                                                                           | 0.0               |
| 6                    | 20.1                                                                                         | 20.1                                                                                           | 0.0               |



# <sup>1</sup>H NMR spectral comparison of natural and synthetic (+)-psiguadial B (3):

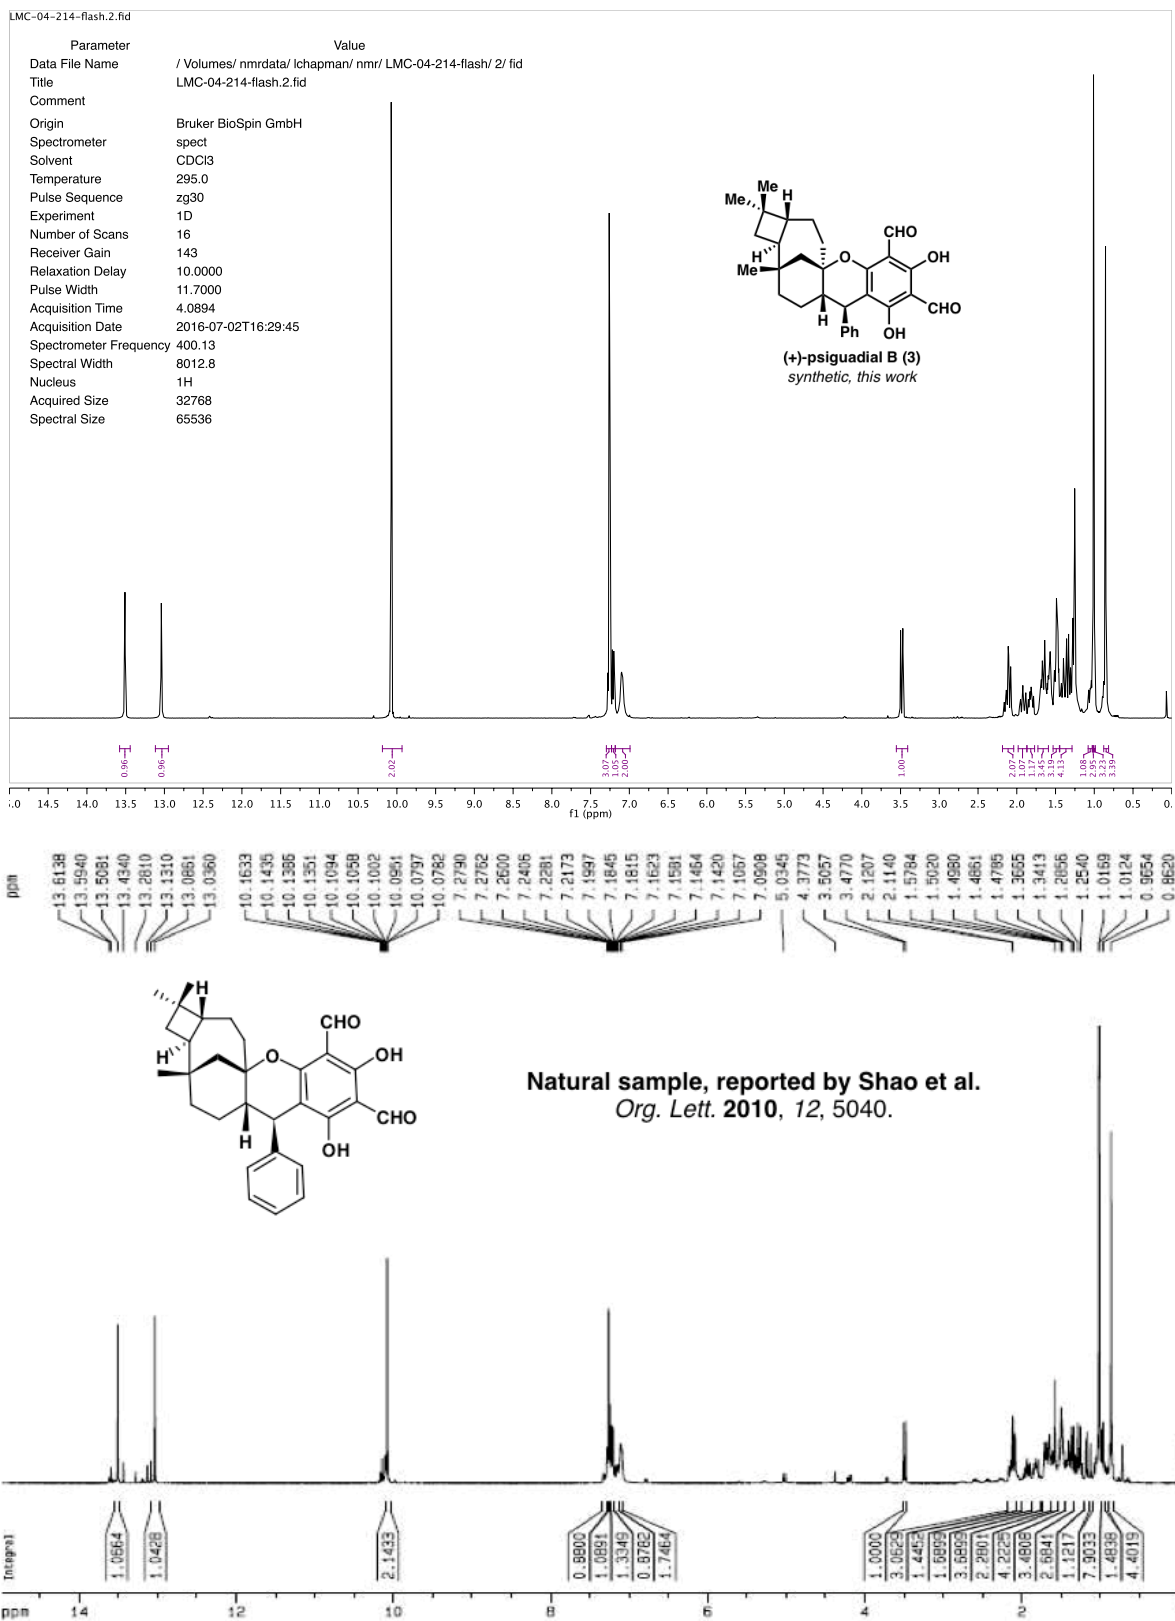

**<sup>13</sup>C NMR spectral comparison of natural and synthetic (+)-psiguadial B (3):**

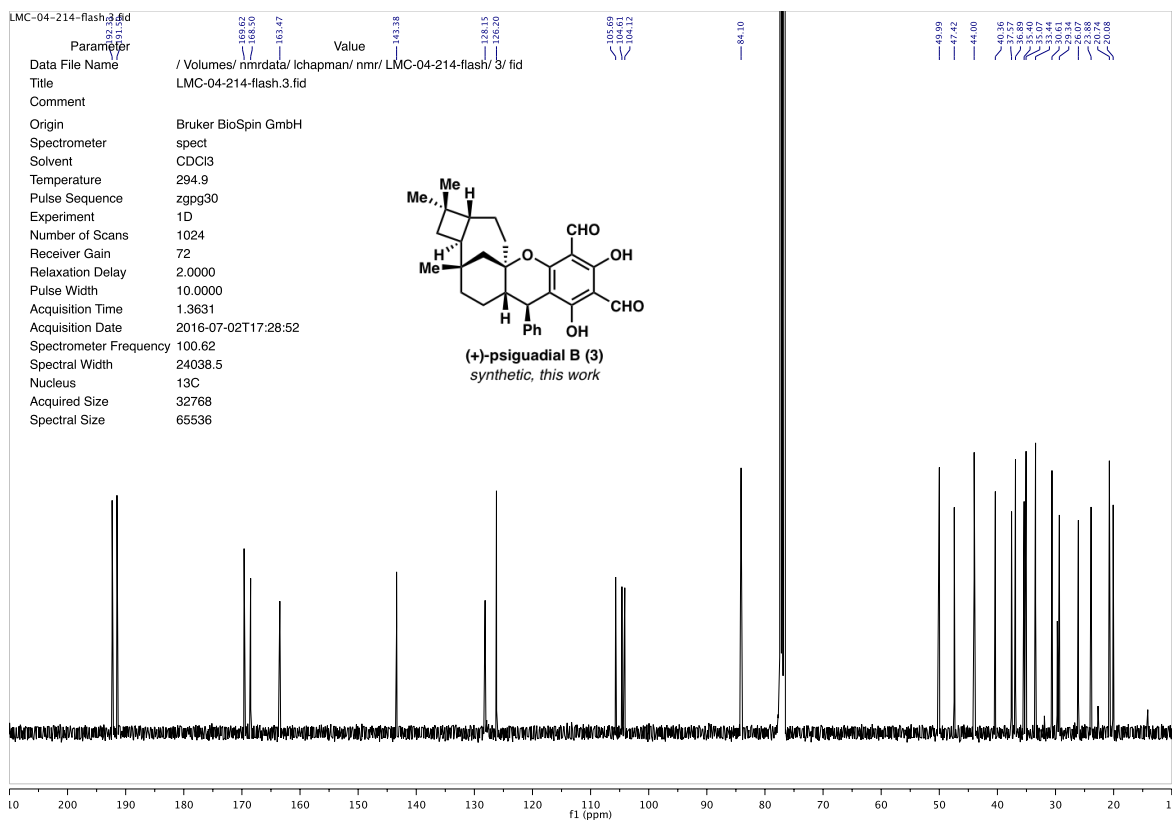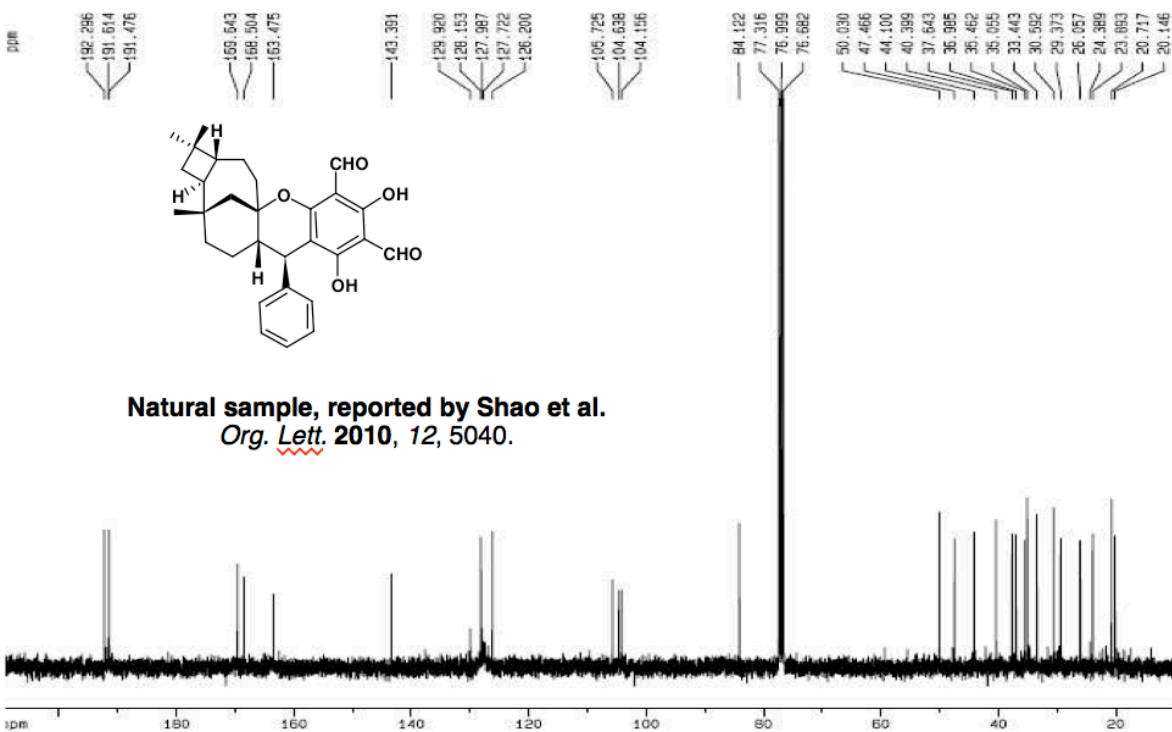

### X-Ray crystallographic data for minor ketone 50:

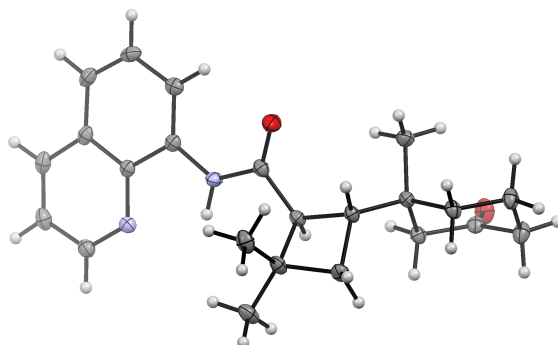

**Table S6.** Crystal data and structure refinement for LMC-04-038 or minor ketone **50**. Graphical representation of the structure with 50% probability thermal ellipsoids was generated using Mercury visualization software.

|                                 |                                                               |          |
|---------------------------------|---------------------------------------------------------------|----------|
| Identification code             | LMC-04-038 or minor ketone <b>50</b> .                        |          |
| Empirical formula               | C <sub>23</sub> H <sub>28</sub> N <sub>2</sub> O <sub>2</sub> |          |
| Formula weight                  | 364.47                                                        |          |
| Temperature                     | 100 K                                                         |          |
| Wavelength                      | 1.54178 Å                                                     |          |
| Crystal system                  | Orthorhombic                                                  |          |
| Space group                     | P2 <sub>1</sub> 2 <sub>1</sub> 2 <sub>1</sub>                 |          |
| Unit cell dimensions            | a = 6.5496(4) Å                                               | α = 90°. |
|                                 | b = 10.8428(6) Å                                              | β = 90°. |
|                                 | c = 27.6666(15) Å                                             | γ = 90°. |
| Volume                          | 1964.77(19) Å <sup>3</sup>                                    |          |
| Z                               | 4                                                             |          |
| Density (calculated)            | 1.232 Mg/m <sup>3</sup>                                       |          |
| Absorption coefficient          | 0.619 mm <sup>-1</sup>                                        |          |
| F(000)                          | 784                                                           |          |
| Crystal size                    | 0.25 x 0.15 x 0.1 mm <sup>3</sup>                             |          |
| Theta range for data collection | 3.195 to 79.392°.                                             |          |
| Index ranges                    | -8 ≤ h ≤ 8, -13 ≤ k ≤ 13, -35 ≤ l ≤ 34                        |          |
| Reflections collected           | 24424                                                         |          |
| Independent reflections         | 4179 [R(int) = 0.0414]                                        |          |
| Completeness to theta = 67.679° | 100.0 %                                                       |          |
| Absorption correction           | Semi-empirical from equivalents                               |          |
| Max. and min. transmission      | 0.7542 and 0.7017                                             |          |
| Refinement method               | Full-matrix least-squares on F <sup>2</sup>                   |          |
| Data / restraints / parameters  | 4179 / 0 / 251                                                |          |

|                                      |                                    |
|--------------------------------------|------------------------------------|
| Goodness-of-fit on $F^2$             | 1.021                              |
| Final R indices [ $I > 2\sigma(I)$ ] | R1 = 0.0272, wR2 = 0.0655          |
| R indices (all data)                 | R1 = 0.0300, wR2 = 0.0672          |
| Absolute structure parameter         | 0.08(9)                            |
| Extinction coefficient               | 0.0031(3)                          |
| Largest diff. peak and hole          | 0.187 and -0.154 e.Å <sup>-3</sup> |

### Crystallographic analysis and refinement details:

Low-temperature diffraction data ( $\varphi$ - and  $\omega$ -scans) were collected on a Bruker AXS D8 VENTURE KAPPA diffractometer coupled to a PHOTON 100 CMOS detector with Cu-K $\alpha$  radiation ( $\lambda = 1.54178 \text{ \AA}$ ) from a I $\mu$ S HB micro-focus sealed X-ray tube. All diffractometer manipulations, including data collection, integration, and scaling were carried out using the Bruker APEXII software.<sup>4</sup> Absorption corrections were applied using SADABS.<sup>5</sup> The structure was solved by intrinsic phasing using SHELXT14 and refined against  $F^2$  on all data by full-matrix least squares with SHELXL-2014<sup>6</sup> using established refinement techniques.<sup>7</sup> All non-hydrogen atoms were refined anisotropically. The coordinates for the hydrogen atom bound to N1 were located in the difference Fourier synthesis and refined using a riding model. All other hydrogen atoms were included into the model at geometrically calculated positions and refined using a riding model. The isotropic displacement parameters of all hydrogen atoms were fixed to 1.2 times the  $U$  value of the atoms they are linked to (1.5 times for methyl groups and hydroxyl groups). Compound **50** crystallizes in the monoclinic space group  $P2_12_12_1$  with one molecule in the asymmetric unit. Absolute configuration was determined by anomalous dispersion (Flack = 0.08(9)).<sup>8</sup> Graphical representation of the structure with 50% probability thermal ellipsoids was generated using Mercury visualization software.<sup>9</sup>

**Table S7.** Atomic coordinates ( $\times 10^4$ ) and equivalent isotropic displacement parameters ( $\text{\AA}^2 \times 10^3$ ) for minor ketone **50**.  $U(\text{eq})$  is defined as one third of the trace of the orthogonalized  $U^{ij}$  tensor.

|       | x        | y       | z       | $U(\text{eq})$ |
|-------|----------|---------|---------|----------------|
| O(2)  | 1276(2)  | 7506(1) | 2689(1) | 28(1)          |
| O(1)  | 8526(2)  | 4834(1) | 3832(1) | 28(1)          |
| N(1)  | 6907(2)  | 5042(1) | 4555(1) | 17(1)          |
| N(2)  | 6036(2)  | 5230(1) | 5486(1) | 17(1)          |
| C(1)  | 6977(2)  | 4762(1) | 4073(1) | 17(1)          |
| C(19) | 9262(2)  | 6260(1) | 5671(1) | 18(1)          |
| C(8)  | 4149(2)  | 4860(1) | 2948(1) | 15(1)          |
| C(23) | 7898(2)  | 5670(1) | 5348(1) | 15(1)          |
| C(15) | 8440(2)  | 5545(1) | 4849(1) | 16(1)          |
| C(7)  | 4752(2)  | 3938(1) | 3343(1) | 16(1)          |
| C(2)  | 4949(2)  | 4328(1) | 3880(1) | 16(1)          |
| C(17) | 11684(2) | 6499(1) | 5023(1) | 21(1)          |
| C(18) | 11180(2) | 6672(1) | 5498(1) | 21(1)          |
| C(16) | 10309(2) | 5955(1) | 4692(1) | 19(1)          |
| C(3)  | 4183(2)  | 3002(1) | 4028(1) | 19(1)          |
| C(22) | 5507(2)  | 5373(2) | 5942(1) | 21(1)          |
| C(10) | 1519(2)  | 6401(2) | 2662(1) | 19(1)          |
| C(14) | 5948(2)  | 5744(2) | 2867(1) | 22(1)          |
| C(21) | 6728(3)  | 5976(2) | 6290(1) | 24(1)          |
| C(9)  | 2231(2)  | 5619(1) | 3083(1) | 18(1)          |
| C(6)  | 3268(3)  | 2907(1) | 3511(1) | 20(1)          |
| C(13) | 3699(2)  | 4120(2) | 2484(1) | 19(1)          |
| C(20) | 8601(3)  | 6410(2) | 6153(1) | 22(1)          |
| C(12) | 2998(2)  | 4916(2) | 2060(1) | 22(1)          |
| C(4)  | 2696(3)  | 2947(2) | 4449(1) | 25(1)          |
| C(5)  | 5955(3)  | 2106(2) | 4103(1) | 26(1)          |
| C(11) | 1133(3)  | 5697(2) | 2200(1) | 24(1)          |

**Table S8.** Bond lengths [Å] and angles [°] for minor ketone **50**.

---

|             |            |
|-------------|------------|
| O(2)-C(10)  | 1.211(2)   |
| O(1)-C(1)   | 1.2176(18) |
| N(1)-C(1)   | 1.3676(19) |
| N(1)-C(15)  | 1.402(2)   |
| N(1)-H(1)   | 0.90(2)    |
| N(2)-C(23)  | 1.364(2)   |
| N(2)-C(22)  | 1.319(2)   |
| C(1)-C(2)   | 1.507(2)   |
| C(19)-C(23) | 1.417(2)   |
| C(19)-C(18) | 1.416(2)   |
| C(19)-C(20) | 1.412(2)   |
| C(8)-C(7)   | 1.534(2)   |
| C(8)-C(14)  | 1.535(2)   |
| C(8)-C(9)   | 1.548(2)   |
| C(8)-C(13)  | 1.540(2)   |
| C(23)-C(15) | 1.431(2)   |
| C(15)-C(16) | 1.373(2)   |
| C(7)-H(7)   | 1.0000     |
| C(7)-C(2)   | 1.5486(19) |
| C(7)-C(6)   | 1.552(2)   |
| C(2)-H(2)   | 1.0000     |
| C(2)-C(3)   | 1.577(2)   |
| C(17)-H(17) | 0.9500     |
| C(17)-C(18) | 1.369(2)   |
| C(17)-C(16) | 1.414(2)   |
| C(18)-H(18) | 0.9500     |
| C(16)-H(16) | 0.9500     |
| C(3)-C(6)   | 1.555(2)   |
| C(3)-C(4)   | 1.520(2)   |
| C(3)-C(5)   | 1.527(2)   |
| C(22)-H(22) | 0.9500     |
| C(22)-C(21) | 1.410(2)   |
| C(10)-C(9)  | 1.514(2)   |
| C(10)-C(11) | 1.511(2)   |

|                   |            |
|-------------------|------------|
| C(14)-H(14A)      | 0.9800     |
| C(14)-H(14B)      | 0.9800     |
| C(14)-H(14C)      | 0.9800     |
| C(21)-H(21)       | 0.9500     |
| C(21)-C(20)       | 1.367(2)   |
| C(9)-H(9A)        | 0.9900     |
| C(9)-H(9B)        | 0.9900     |
| C(6)-H(6A)        | 0.9900     |
| C(6)-H(6B)        | 0.9900     |
| C(13)-H(13A)      | 0.9900     |
| C(13)-H(13B)      | 0.9900     |
| C(13)-C(12)       | 1.527(2)   |
| C(20)-H(20)       | 0.9500     |
| C(12)-H(12A)      | 0.9900     |
| C(12)-H(12B)      | 0.9900     |
| C(12)-C(11)       | 1.535(2)   |
| C(4)-H(4A)        | 0.9800     |
| C(4)-H(4B)        | 0.9800     |
| C(4)-H(4C)        | 0.9800     |
| C(5)-H(5A)        | 0.9800     |
| C(5)-H(5B)        | 0.9800     |
| C(5)-H(5C)        | 0.9800     |
| C(11)-H(11A)      | 0.9900     |
| C(11)-H(11B)      | 0.9900     |
|                   |            |
| C(1)-N(1)-C(15)   | 128.85(13) |
| C(1)-N(1)-H(1)    | 119.7(13)  |
| C(15)-N(1)-H(1)   | 111.4(13)  |
| C(22)-N(2)-C(23)  | 117.51(13) |
| O(1)-C(1)-N(1)    | 123.29(14) |
| O(1)-C(1)-C(2)    | 124.01(13) |
| N(1)-C(1)-C(2)    | 112.68(12) |
| C(18)-C(19)-C(23) | 119.31(14) |
| C(20)-C(19)-C(23) | 117.04(14) |
| C(20)-C(19)-C(18) | 123.65(15) |
| C(7)-C(8)-C(14)   | 108.23(12) |

|                   |            |
|-------------------|------------|
| C(7)-C(8)-C(9)    | 112.51(12) |
| C(7)-C(8)-C(13)   | 107.68(12) |
| C(14)-C(8)-C(9)   | 109.05(13) |
| C(14)-C(8)-C(13)  | 110.57(12) |
| C(13)-C(8)-C(9)   | 108.79(12) |
| N(2)-C(23)-C(19)  | 123.01(13) |
| N(2)-C(23)-C(15)  | 117.29(13) |
| C(19)-C(23)-C(15) | 119.68(14) |
| N(1)-C(15)-C(23)  | 114.75(13) |
| C(16)-C(15)-N(1)  | 125.50(14) |
| C(16)-C(15)-C(23) | 119.69(14) |
| C(8)-C(7)-H(7)    | 107.9      |
| C(8)-C(7)-C(2)    | 121.88(12) |
| C(8)-C(7)-C(6)    | 121.41(13) |
| C(2)-C(7)-H(7)    | 107.9      |
| C(2)-C(7)-C(6)    | 87.86(11)  |
| C(6)-C(7)-H(7)    | 107.9      |
| C(1)-C(2)-C(7)    | 119.93(12) |
| C(1)-C(2)-H(2)    | 109.5      |
| C(1)-C(2)-C(3)    | 118.23(13) |
| C(7)-C(2)-H(2)    | 109.5      |
| C(7)-C(2)-C(3)    | 88.51(11)  |
| C(3)-C(2)-H(2)    | 109.5      |
| C(18)-C(17)-H(17) | 119.1      |
| C(18)-C(17)-C(16) | 121.76(15) |
| C(16)-C(17)-H(17) | 119.1      |
| C(19)-C(18)-H(18) | 120.2      |
| C(17)-C(18)-C(19) | 119.62(15) |
| C(17)-C(18)-H(18) | 120.2      |
| C(15)-C(16)-C(17) | 119.85(14) |
| C(15)-C(16)-H(16) | 120.1      |
| C(17)-C(16)-H(16) | 120.1      |
| C(6)-C(3)-C(2)    | 86.77(11)  |
| C(4)-C(3)-C(2)    | 116.02(12) |
| C(4)-C(3)-C(6)    | 117.16(14) |
| C(4)-C(3)-C(5)    | 110.98(13) |



|                     |            |
|---------------------|------------|
| C(5)-C(3)-C(2)      | 111.89(13) |
| C(5)-C(3)-C(6)      | 112.06(13) |
| N(2)-C(22)-H(22)    | 118.0      |
| N(2)-C(22)-C(21)    | 123.90(15) |
| C(21)-C(22)-H(22)   | 118.0      |
| O(2)-C(10)-C(9)     | 123.15(15) |
| O(2)-C(10)-C(11)    | 122.04(15) |
| C(11)-C(10)-C(9)    | 114.80(14) |
| C(8)-C(14)-H(14A)   | 109.5      |
| C(8)-C(14)-H(14B)   | 109.5      |
| C(8)-C(14)-H(14C)   | 109.5      |
| H(14A)-C(14)-H(14B) | 109.5      |
| H(14A)-C(14)-H(14C) | 109.5      |
| H(14B)-C(14)-H(14C) | 109.5      |
| C(22)-C(21)-H(21)   | 120.7      |
| C(20)-C(21)-C(22)   | 118.69(15) |
| C(20)-C(21)-H(21)   | 120.7      |
| C(8)-C(9)-H(9A)     | 109.4      |
| C(8)-C(9)-H(9B)     | 109.4      |
| C(10)-C(9)-C(8)     | 111.24(12) |
| C(10)-C(9)-H(9A)    | 109.4      |
| C(10)-C(9)-H(9B)    | 109.4      |
| H(9A)-C(9)-H(9B)    | 108.0      |
| C(7)-C(6)-C(3)      | 89.19(11)  |
| C(7)-C(6)-H(6A)     | 113.8      |
| C(7)-C(6)-H(6B)     | 113.8      |
| C(3)-C(6)-H(6A)     | 113.8      |
| C(3)-C(6)-H(6B)     | 113.8      |
| H(6A)-C(6)-H(6B)    | 111.0      |
| C(8)-C(13)-H(13A)   | 108.8      |
| C(8)-C(13)-H(13B)   | 108.8      |
| H(13A)-C(13)-H(13B) | 107.7      |
| C(12)-C(13)-C(8)    | 113.71(13) |
| C(12)-C(13)-H(13A)  | 108.8      |
| C(12)-C(13)-H(13B)  | 108.8      |
| C(19)-C(20)-H(20)   | 120.1      |

|                     |            |
|---------------------|------------|
| C(21)-C(20)-C(19)   | 119.80(15) |
| C(21)-C(20)-H(20)   | 120.1      |
| C(13)-C(12)-H(12A)  | 109.4      |
| C(13)-C(12)-H(12B)  | 109.4      |
| C(13)-C(12)-C(11)   | 111.00(13) |
| H(12A)-C(12)-H(12B) | 108.0      |
| C(11)-C(12)-H(12A)  | 109.4      |
| C(11)-C(12)-H(12B)  | 109.4      |
| C(3)-C(4)-H(4A)     | 109.5      |
| C(3)-C(4)-H(4B)     | 109.5      |
| C(3)-C(4)-H(4C)     | 109.5      |
| H(4A)-C(4)-H(4B)    | 109.5      |
| H(4A)-C(4)-H(4C)    | 109.5      |
| H(4B)-C(4)-H(4C)    | 109.5      |
| C(3)-C(5)-H(5A)     | 109.5      |
| C(3)-C(5)-H(5B)     | 109.5      |
| C(3)-C(5)-H(5C)     | 109.5      |
| H(5A)-C(5)-H(5B)    | 109.5      |
| H(5A)-C(5)-H(5C)    | 109.5      |
| H(5B)-C(5)-H(5C)    | 109.5      |
| C(10)-C(11)-C(12)   | 110.96(13) |
| C(10)-C(11)-H(11A)  | 109.4      |
| C(10)-C(11)-H(11B)  | 109.4      |
| C(12)-C(11)-H(11A)  | 109.4      |
| C(12)-C(11)-H(11B)  | 109.4      |
| H(11A)-C(11)-H(11B) | 108.0      |

---

**Table S9.** Anisotropic displacement parameters ( $\text{\AA}^2 \times 10^4$ ) for minor ketone **50**. The anisotropic displacement factor exponent takes the form:  $-2\pi^2 [h^2 a^{*2} U^{11} + \dots + 2 h k a^* b^* U^{12}]$

|       | U <sup>11</sup> | U <sup>22</sup> | U <sup>33</sup> | U <sup>23</sup> | U <sup>13</sup> | U <sup>12</sup> |
|-------|-----------------|-----------------|-----------------|-----------------|-----------------|-----------------|
| O(2)  | 36(1)           | 22(1)           | 27(1)           | 0(1)            | -3(1)           | 8(1)            |
| O(1)  | 19(1)           | 47(1)           | 18(1)           | -3(1)           | 4(1)            | -2(1)           |
| N(1)  | 15(1)           | 21(1)           | 16(1)           | -2(1)           | 3(1)            | -3(1)           |
| N(2)  | 18(1)           | 17(1)           | 17(1)           | 1(1)            | 1(1)            | 1(1)            |
| C(1)  | 20(1)           | 16(1)           | 16(1)           | 1(1)            | 2(1)            | 2(1)            |
| C(19) | 20(1)           | 12(1)           | 21(1)           | 2(1)            | -6(1)           | 2(1)            |
| C(8)  | 17(1)           | 16(1)           | 14(1)           | 1(1)            | 2(1)            | 0(1)            |
| C(23) | 16(1)           | 12(1)           | 17(1)           | 1(1)            | -1(1)           | 2(1)            |
| C(15) | 17(1)           | 13(1)           | 18(1)           | 0(1)            | -1(1)           | 2(1)            |
| C(7)  | 19(1)           | 15(1)           | 14(1)           | 0(1)            | 1(1)            | 1(1)            |
| C(2)  | 18(1)           | 15(1)           | 14(1)           | 0(1)            | 3(1)            | 0(1)            |
| C(17) | 14(1)           | 16(1)           | 33(1)           | 5(1)            | -1(1)           | -1(1)           |
| C(18) | 20(1)           | 16(1)           | 28(1)           | 2(1)            | -9(1)           | -2(1)           |
| C(16) | 18(1)           | 16(1)           | 22(1)           | 2(1)            | 2(1)            | 2(1)            |
| C(3)  | 26(1)           | 14(1)           | 16(1)           | 1(1)            | 3(1)            | -2(1)           |
| C(22) | 23(1)           | 23(1)           | 18(1)           | 2(1)            | 1(1)            | 0(1)            |
| C(10) | 16(1)           | 22(1)           | 19(1)           | -1(1)           | 2(1)            | 4(1)            |
| C(14) | 19(1)           | 23(1)           | 25(1)           | 6(1)            | -1(1)           | -3(1)           |
| C(21) | 32(1)           | 24(1)           | 15(1)           | 0(1)            | -1(1)           | 2(1)            |
| C(9)  | 20(1)           | 18(1)           | 15(1)           | -1(1)           | 2(1)            | 1(1)            |
| C(6)  | 25(1)           | 14(1)           | 19(1)           | -1(1)           | 1(1)            | -3(1)           |
| C(13) | 21(1)           | 20(1)           | 15(1)           | -2(1)           | 2(1)            | 3(1)            |
| C(20) | 29(1)           | 17(1)           | 19(1)           | -1(1)           | -8(1)           | 2(1)            |
| C(12) | 24(1)           | 29(1)           | 15(1)           | -3(1)           | 1(1)            | 7(1)            |
| C(4)  | 34(1)           | 21(1)           | 21(1)           | 1(1)            | 8(1)            | -6(1)           |
| C(5)  | 36(1)           | 18(1)           | 22(1)           | 3(1)            | 0(1)            | 4(1)            |
| C(11) | 24(1)           | 30(1)           | 18(1)           | -3(1)           | -3(1)           | 7(1)            |

**Table S10.** Hydrogen coordinates ( $\times 10^4$ ) and isotropic displacement parameters ( $\text{\AA}^2 \times 10^3$ ) for minor ketone **50**.

|        | x        | y        | z       | U(eq) |
|--------|----------|----------|---------|-------|
| H(7)   | 6064     | 3539     | 3245    | 19    |
| H(2)   | 3872     | 4950     | 3959    | 19    |
| H(17)  | 12993    | 6751     | 4913    | 25    |
| H(18)  | 12112    | 7066     | 5712    | 25    |
| H(16)  | 10677    | 5874     | 4361    | 22    |
| H(22)  | 4228     | 5051     | 6044    | 25    |
| H(14A) | 6225     | 6198     | 3166    | 34    |
| H(14B) | 5607     | 6327     | 2609    | 34    |
| H(14C) | 7162     | 5270     | 2775    | 34    |
| H(21)  | 6258     | 6078     | 6612    | 28    |
| H(9A)  | 1121     | 5052     | 3180    | 21    |
| H(9B)  | 2548     | 6159     | 3361    | 21    |
| H(6A)  | 3511     | 2101     | 3353    | 23    |
| H(6B)  | 1810     | 3142     | 3492    | 23    |
| H(13A) | 4948     | 3668     | 2389    | 22    |
| H(13B) | 2627     | 3502     | 2556    | 22    |
| H(20)  | 9454     | 6811     | 6382    | 26    |
| H(12A) | 2645     | 4379     | 1783    | 27    |
| H(12B) | 4127     | 5466     | 1959    | 27    |
| H(4A)  | 3400     | 3189     | 4747    | 38    |
| H(4B)  | 2174     | 2105     | 4483    | 38    |
| H(4C)  | 1557     | 3513     | 4389    | 38    |
| H(5A)  | 6918     | 2181     | 3833    | 38    |
| H(5B)  | 5430     | 1261     | 4117    | 38    |
| H(5C)  | 6654     | 2302     | 4406    | 38    |
| H(11A) | 825      | 6286     | 1936    | 29    |
| H(11B) | -67      | 5153     | 2242    | 29    |
| H(1)   | 5760(30) | 4900(20) | 4724(7) | 29    |

**Table S11.** Torsion angles [°] for minor ketone **50**.

---

|                         |             |
|-------------------------|-------------|
| O(2)-C(10)-C(9)-C(8)    | -125.20(17) |
| O(2)-C(10)-C(11)-C(12)  | 127.00(17)  |
| O(1)-C(1)-C(2)-C(7)     | 0.1(2)      |
| O(1)-C(1)-C(2)-C(3)     | 106.07(18)  |
| N(1)-C(1)-C(2)-C(7)     | -178.49(13) |
| N(1)-C(1)-C(2)-C(3)     | -72.53(17)  |
| N(1)-C(15)-C(16)-C(17)  | 176.96(14)  |
| N(2)-C(23)-C(15)-N(1)   | 3.66(19)    |
| N(2)-C(23)-C(15)-C(16)  | -179.03(13) |
| N(2)-C(22)-C(21)-C(20)  | -2.0(3)     |
| C(1)-N(1)-C(15)-C(23)   | -177.11(14) |
| C(1)-N(1)-C(15)-C(16)   | 5.8(3)      |
| C(1)-C(2)-C(3)-C(6)     | -144.20(13) |
| C(1)-C(2)-C(3)-C(4)     | 97.03(17)   |
| C(1)-C(2)-C(3)-C(5)     | -31.70(18)  |
| C(19)-C(23)-C(15)-N(1)  | -174.83(13) |
| C(19)-C(23)-C(15)-C(16) | 2.5(2)      |
| C(8)-C(7)-C(2)-C(1)     | -91.02(17)  |
| C(8)-C(7)-C(2)-C(3)     | 146.90(14)  |
| C(8)-C(7)-C(6)-C(3)     | -147.60(13) |
| C(8)-C(13)-C(12)-C(11)  | -55.22(18)  |
| C(23)-N(2)-C(22)-C(21)  | 1.6(2)      |
| C(23)-C(19)-C(18)-C(17) | 0.3(2)      |
| C(23)-C(19)-C(20)-C(21) | 0.9(2)      |
| C(23)-C(15)-C(16)-C(17) | 0.0(2)      |
| C(15)-N(1)-C(1)-O(1)    | 6.0(3)      |
| C(15)-N(1)-C(1)-C(2)    | -175.39(14) |
| C(7)-C(8)-C(9)-C(10)    | -172.85(13) |
| C(7)-C(8)-C(13)-C(12)   | 177.89(13)  |
| C(7)-C(2)-C(3)-C(6)     | -20.67(11)  |
| C(7)-C(2)-C(3)-C(4)     | -139.44(14) |
| C(7)-C(2)-C(3)-C(5)     | 91.84(14)   |
| C(2)-C(7)-C(6)-C(3)     | -20.99(11)  |
| C(2)-C(3)-C(6)-C(7)     | 20.61(11)   |

|                         |             |
|-------------------------|-------------|
| C(18)-C(19)-C(23)-N(2)  | 179.01(14)  |
| C(18)-C(19)-C(23)-C(15) | -2.6(2)     |
| C(18)-C(19)-C(20)-C(21) | -179.54(15) |
| C(18)-C(17)-C(16)-C(15) | -2.4(2)     |
| C(16)-C(17)-C(18)-C(19) | 2.3(2)      |
| C(22)-N(2)-C(23)-C(19)  | 0.2(2)      |
| C(22)-N(2)-C(23)-C(15)  | -178.22(14) |
| C(22)-C(21)-C(20)-C(19) | 0.7(2)      |
| C(14)-C(8)-C(7)-C(2)    | 71.18(17)   |
| C(14)-C(8)-C(7)-C(6)    | -179.66(13) |
| C(14)-C(8)-C(9)-C(10)   | 67.06(16)   |
| C(14)-C(8)-C(13)-C(12)  | -64.05(17)  |
| C(9)-C(8)-C(7)-C(2)     | -49.38(18)  |
| C(9)-C(8)-C(7)-C(6)     | 59.77(18)   |
| C(9)-C(8)-C(13)-C(12)   | 55.69(16)   |
| C(9)-C(10)-C(11)-C(12)  | -52.89(19)  |
| C(6)-C(7)-C(2)-C(1)     | 142.76(14)  |
| C(6)-C(7)-C(2)-C(3)     | 20.68(11)   |
| C(13)-C(8)-C(7)-C(2)    | -169.26(13) |
| C(13)-C(8)-C(7)-C(6)    | -60.10(17)  |
| C(13)-C(8)-C(9)-C(10)   | -53.62(16)  |
| C(13)-C(12)-C(11)-C(10) | 51.44(19)   |
| C(20)-C(19)-C(23)-N(2)  | -1.4(2)     |
| C(20)-C(19)-C(23)-C(15) | 176.96(13)  |
| C(20)-C(19)-C(18)-C(17) | -179.26(15) |
| C(4)-C(3)-C(6)-C(7)     | 138.32(14)  |
| C(5)-C(3)-C(6)-C(7)     | -91.73(14)  |
| C(11)-C(10)-C(9)-C(8)   | 54.70(18)   |

---

## References

- (1) Isolation of psiguadials A and B: Shao, M.; Wang, Y.; Liu, Z.; Zhang, D.-M.; Cao, H.-H.; Jiang, R.-W.; Fan, C.-L.; Zhang, X.-Q.; Chen, H.-R.; Yao, X.-S.; Ye, W.-C. *Org. Lett.* **2010**, *12*, 5040. Except where designated, multiplicities are not specified.
- (2) Shao et al. report the two protons at 7.23 ppm as corresponding to the carbon signal at 126.2 ppm (carbons 10' and 12'). This is assumed to be a typographical error based on the reported plot of their HSQC spectrum and our own data showing a correlation between the proton signal at 7.26 ppm and the more downfield carbon shift at 128.2 ppm, which corresponds to carbons 9' and 13'. The remaining three aromatic proton signals are adjusted accordingly in the comparison list.
- (3) The center peak of CDCl<sub>3</sub> is referenced to 76.999 ppm, as shown in the Shao et al. report, see <sup>13</sup>C spectral comparison on page S18.
- (4) APEX2, Version 2 User Manual, M86-E01078, Bruker Analytical X-ray Systems, Madison, WI, June 2006.
- (5) Sheldrick, G.M. "*SADABS (version 2008/1): Program for Absorption Correction for Data from Area Detector Frames*", University of Göttingen, 2008.
- (6) Sheldrick, G. M. *Acta Crystallogr A* **2008**, *64*, 112.
- (7) Müller, P. *Crystallogr. Rev.* **2009**, *15*, 57.
- (8) Parsons, S.; Flack, H. D.; Wagner, T. *Acta Cryst.* **2013**, *69*, 249.
- (9) Macrae, C. F.; Edgington, P. R.; McCabe, P.; Pidcock, E.; Shields, G. P.; Taylor, R.; Towler M.; van de Streek, J. *J. Appl. Cryst.* **2006**, *39*, 453.

CRL-01-67-diazo.1.fid

| Parameter              | Value                                                      |
|------------------------|------------------------------------------------------------|
| Data File Name         | / Volumes/ nmrdata/ lchapman/ nmr/ CRL-01-67-diazo/ 1/ fid |
| Title                  | CRL-01-67-diazo.1.fid                                      |
| Origin                 | Bruker BioSpin GmbH                                        |
| Spectrometer           | spect                                                      |
| Solvent                | CDCl <sub>3</sub>                                          |
| Temperature            | 295.0                                                      |
| Pulse Sequence         | zg30                                                       |
| Experiment             | 1D                                                         |
| Number of Scans        | 1                                                          |
| Receiver Gain          | 14                                                         |
| Relaxation Delay       | 1.0000                                                     |
| Pulse Width            | 11.7000                                                    |
| Acquisition Time       | 4.0894                                                     |
| Acquisition Date       | 2017-04-10T14:06:42                                        |
| Spectrometer Frequency | 400.13                                                     |
| Spectral Width         | 8012.8                                                     |
| Nucleus                | <sup>1</sup> H                                             |
| Acquired Size          | 32768                                                      |
| Spectral Size          | 65536                                                      |

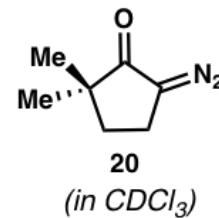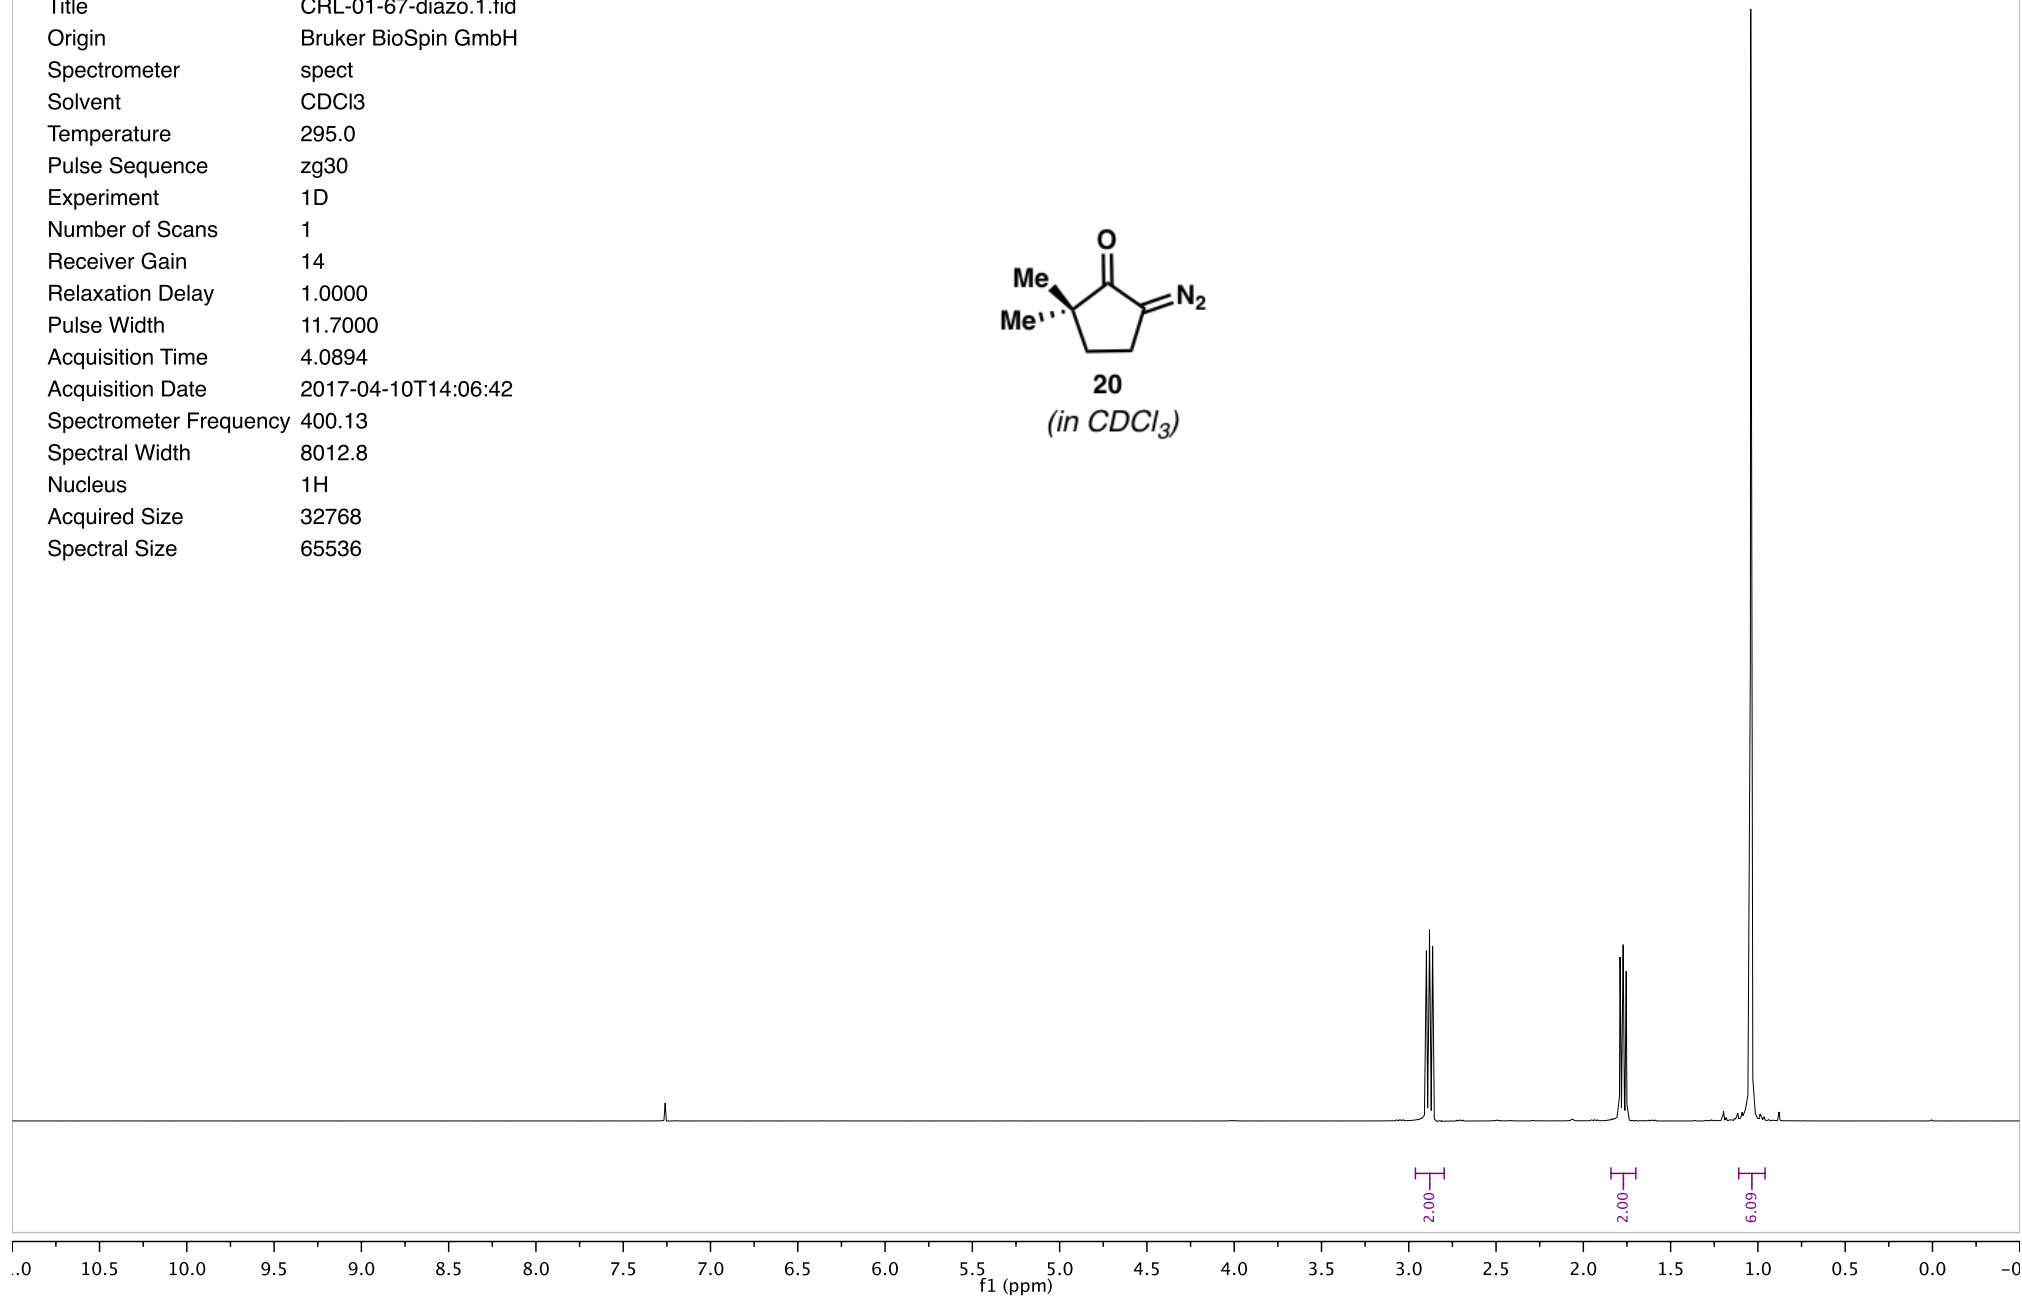



| Parameter              | Value                                                      |
|------------------------|------------------------------------------------------------|
| Data File Name         | / Volumes/ nmrdata/ lchapman/ nmr/ CRL-01-67-diazo/ 2/ fid |
| Title                  | CRL-01-67-diazo.2.fid                                      |
| Origin                 | Bruker BioSpin GmbH                                        |
| Spectrometer           | spect                                                      |
| Solvent                | CDCl <sub>3</sub>                                          |
| Temperature            | 295.0                                                      |
| Pulse Sequence         | zgpg30                                                     |
| Experiment             | 1D                                                         |
| Number of Scans        | 128                                                        |
| Receiver Gain          | 50                                                         |
| Relaxation Delay       | 2.0000                                                     |
| Pulse Width            | 10.0000                                                    |
| Acquisition Time       | 1.3631                                                     |
| Acquisition Date       | 2017-04-10T14:22:29                                        |
| Spectrometer Frequency | 100.62                                                     |
| Spectral Width         | 24038.5                                                    |
| Nucleus                | <sup>13</sup> C                                            |
| Acquired Size          | 32768                                                      |
| Spectral Size          | 65536                                                      |

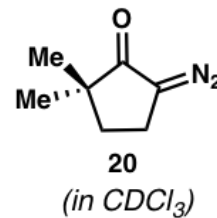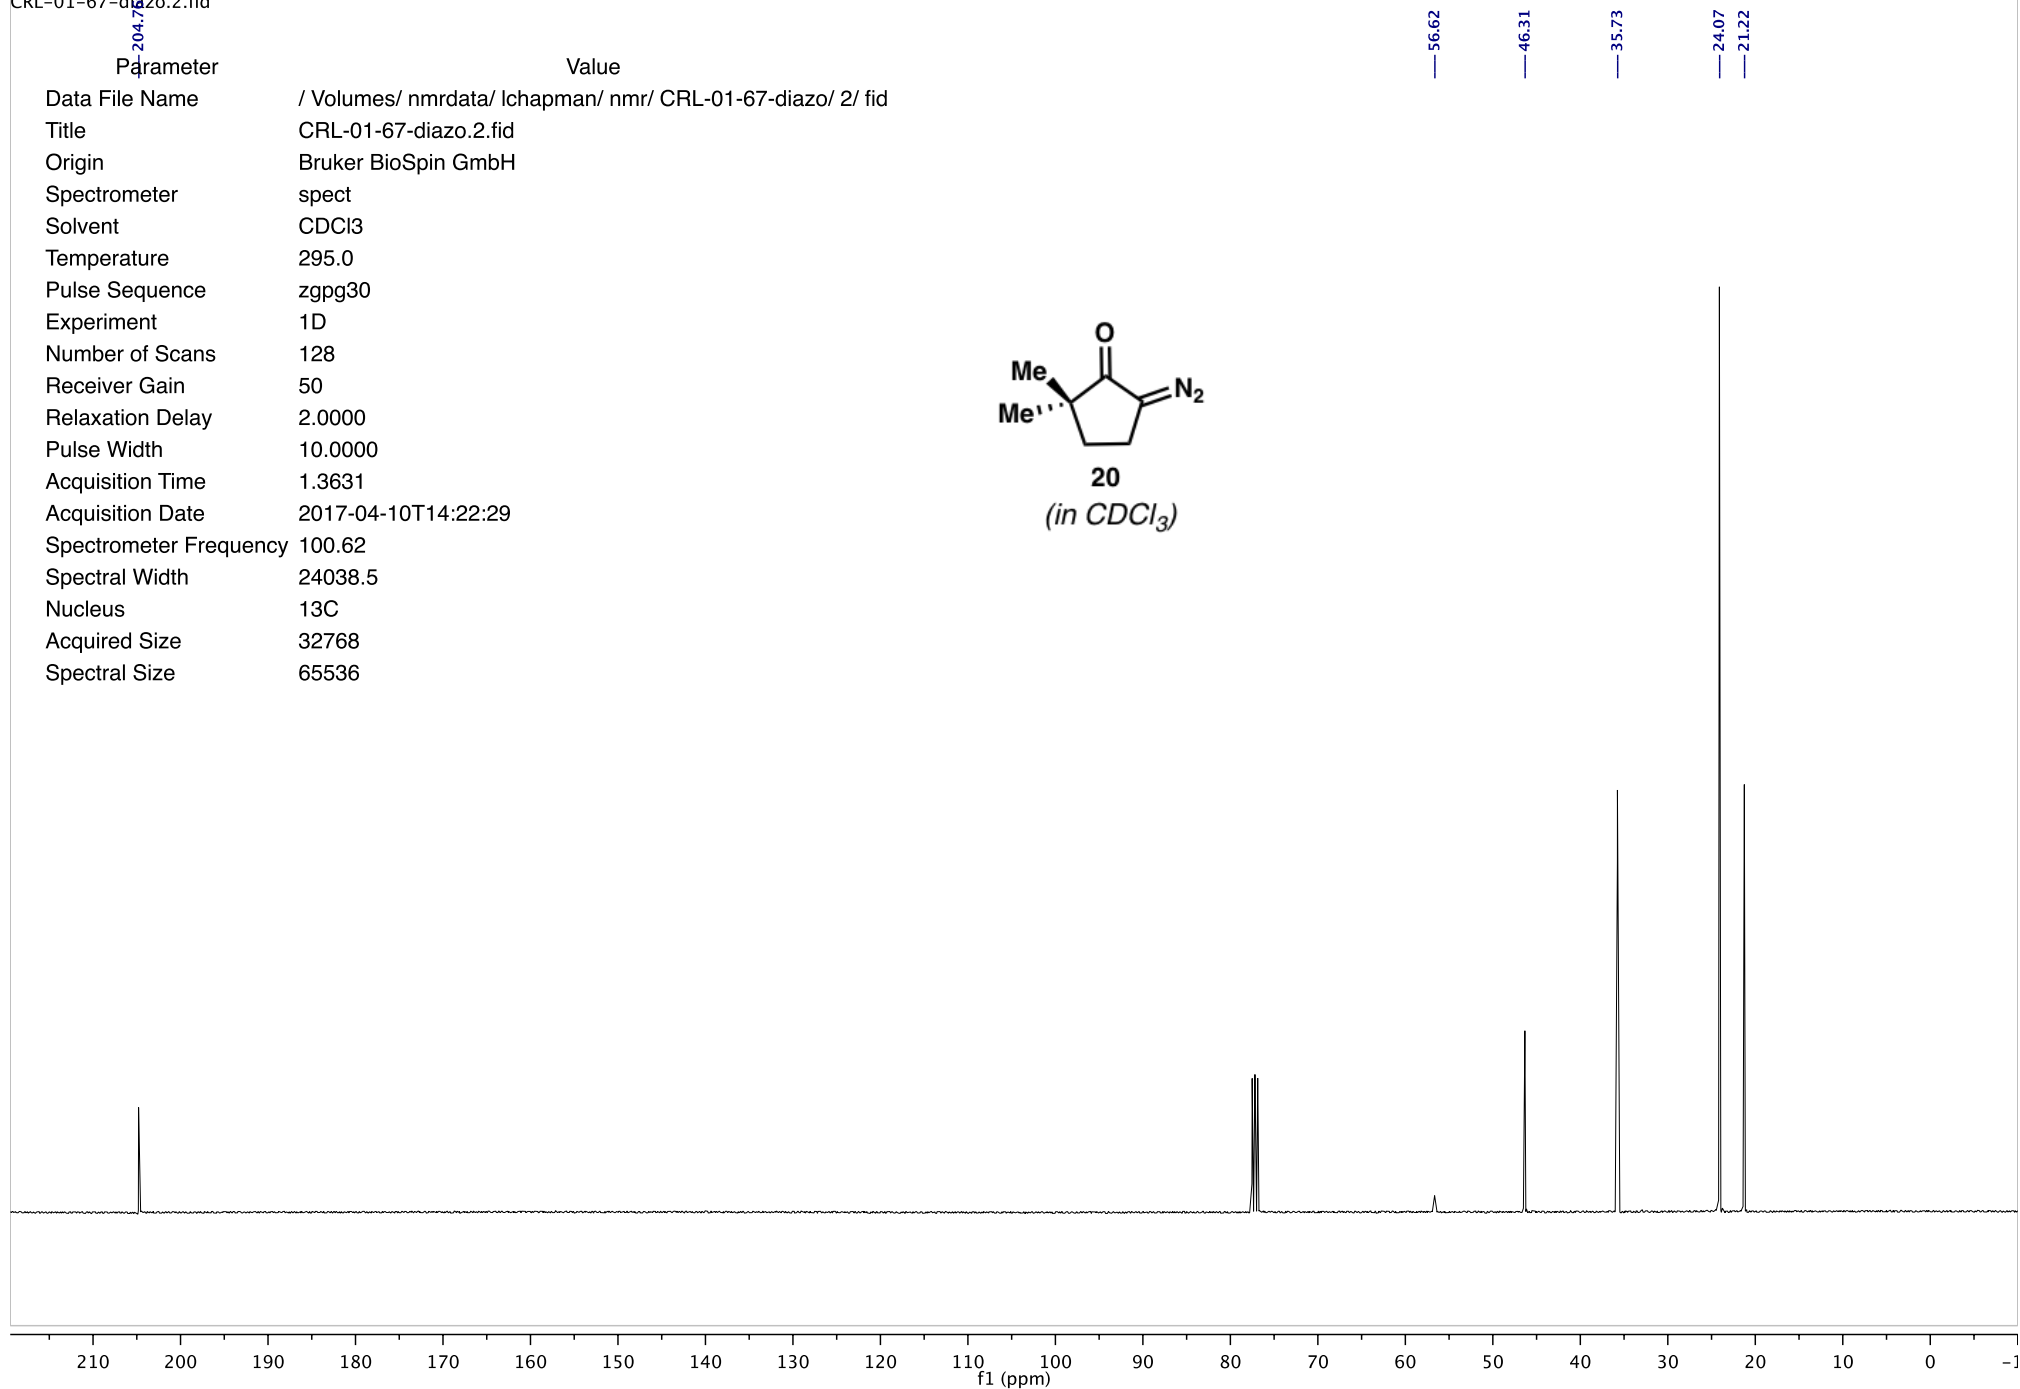

| Parameter              | Value                                                          |
|------------------------|----------------------------------------------------------------|
| Data File Name         | / Volumes/ nmrdata/ lchapman/ nmr/ LMC-04-273-diazo-SM/ 1/ fid |
| Title                  | LMC-04-273-diazo-SM.1.fid                                      |
| Origin                 | Bruker BioSpin GmbH                                            |
| Spectrometer           | spect                                                          |
| Solvent                | THF                                                            |
| Temperature            | 294.9                                                          |
| Pulse Sequence         | zg30                                                           |
| Experiment             | 1D                                                             |
| Number of Scans        | 16                                                             |
| Receiver Gain          | 88                                                             |
| Relaxation Delay       | 1.0000                                                         |
| Pulse Width            | 11.7000                                                        |
| Acquisition Time       | 4.0894                                                         |
| Acquisition Date       | 2017-04-05T18:51:19                                            |
| Spectrometer Frequency | 400.13                                                         |
| Spectral Width         | 8012.8                                                         |
| Nucleus                | <sup>1</sup> H                                                 |
| Acquired Size          | 32768                                                          |
| Spectral Size          | 65536                                                          |

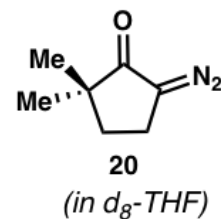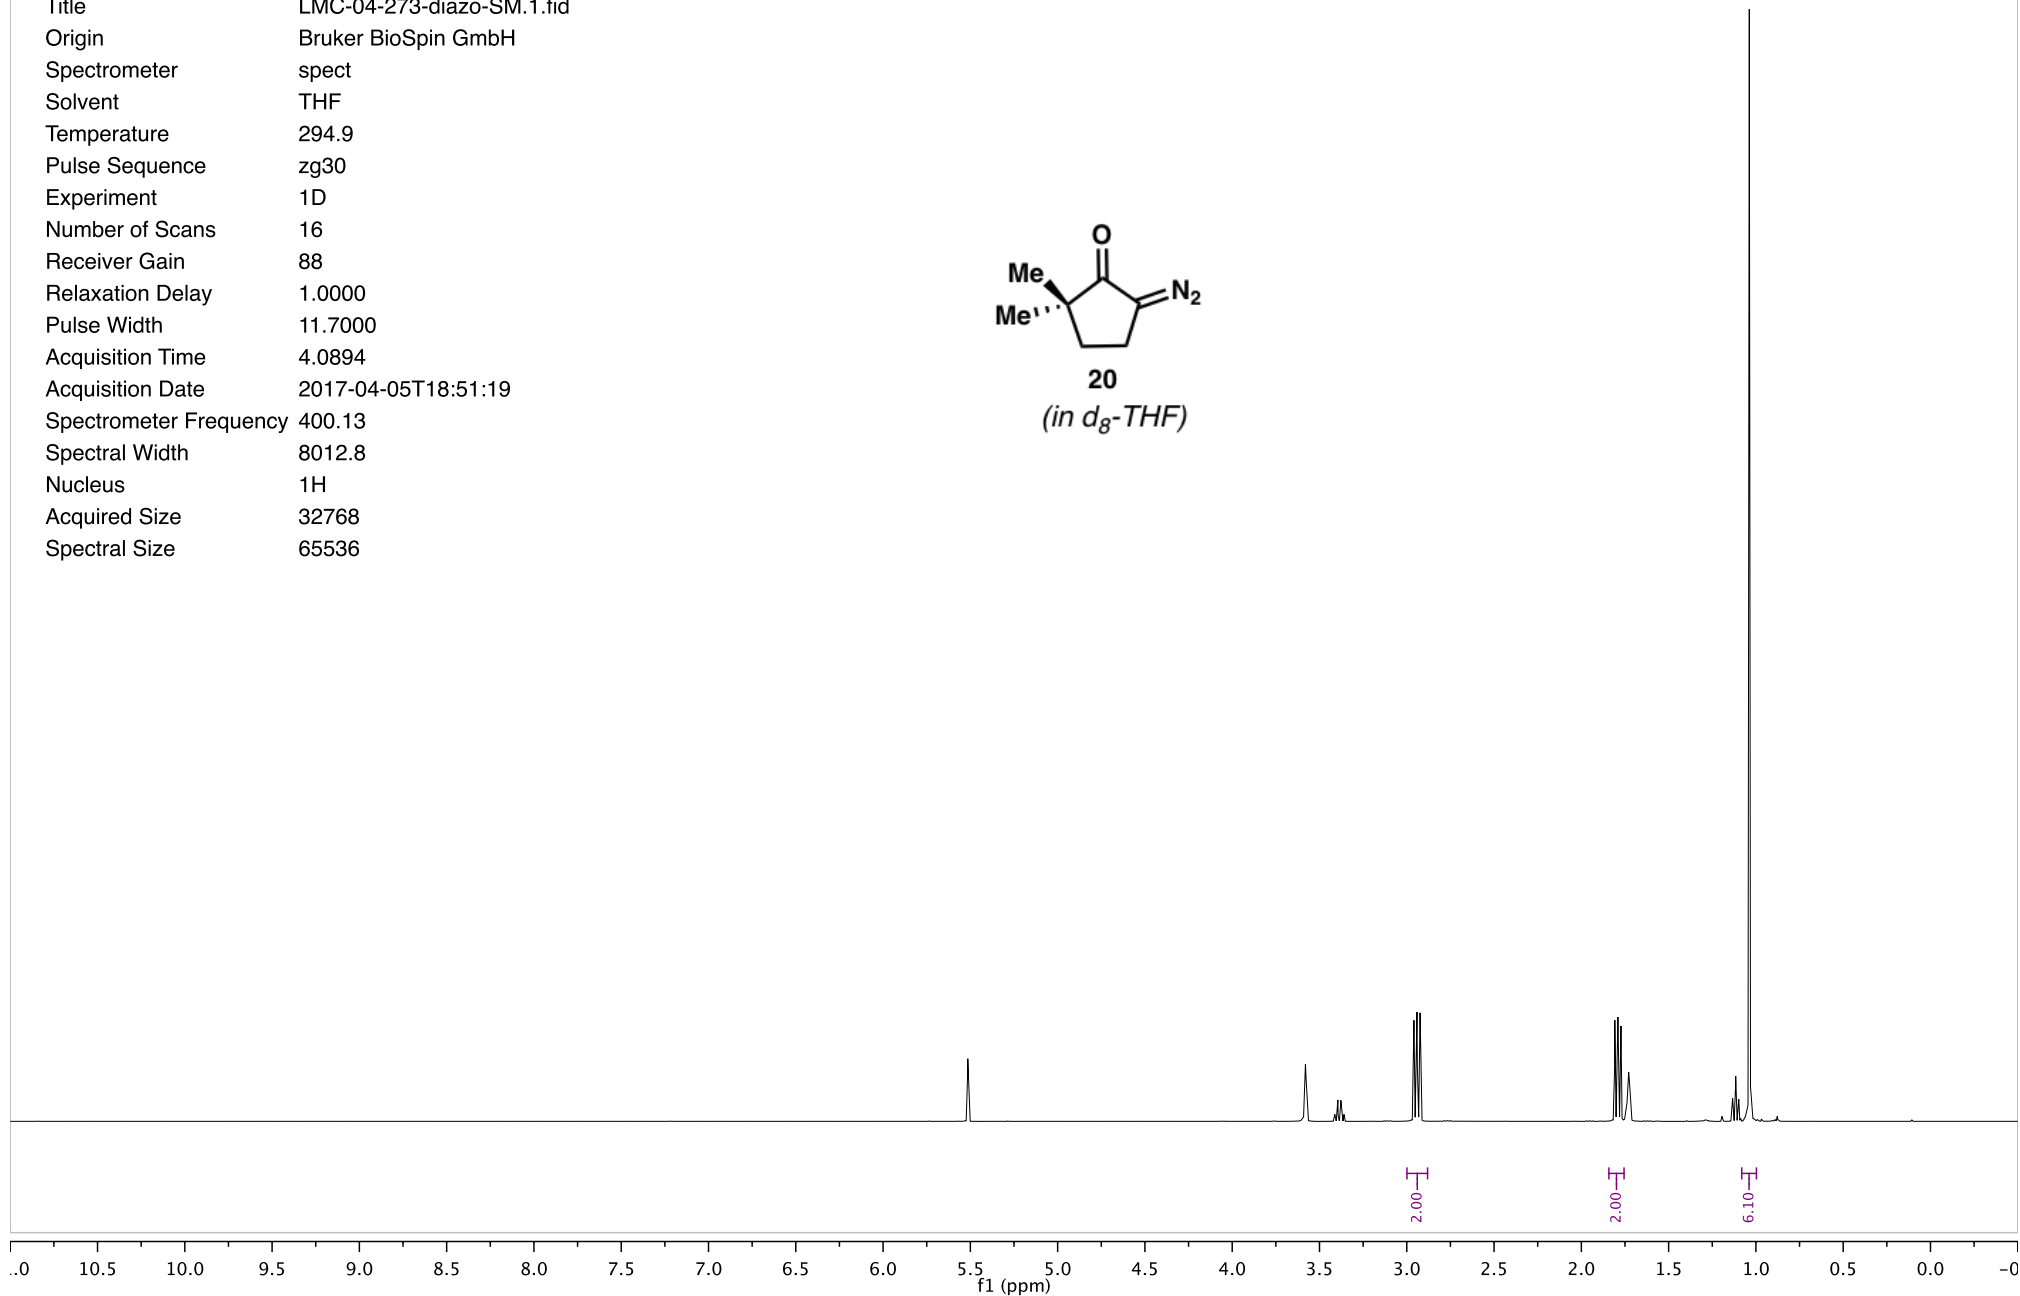

| Parameter              | Value                                                          |
|------------------------|----------------------------------------------------------------|
| Data File Name         | / Volumes/ nmrdata/ lchapman/ nmr/ LMC-04-273-diazo-SM/ 2/ fid |
| Title                  | LMC-04-273-diazo-SM.2.fid                                      |
| Origin                 | Bruker BioSpin GmbH                                            |
| Spectrometer           | spect                                                          |
| Solvent                | THF                                                            |
| Temperature            | 295.0                                                          |
| Pulse Sequence         | zgpg30                                                         |
| Experiment             | 1D                                                             |
| Number of Scans        | 256                                                            |
| Receiver Gain          | 50                                                             |
| Relaxation Delay       | 2.0000                                                         |
| Pulse Width            | 10.0000                                                        |
| Acquisition Time       | 1.3631                                                         |
| Acquisition Date       | 2017-04-05T19:06:38                                            |
| Spectrometer Frequency | 100.62                                                         |
| Spectral Width         | 24038.5                                                        |
| Nucleus                | 13C                                                            |
| Acquired Size          | 32768                                                          |
| Spectral Size          | 65536                                                          |

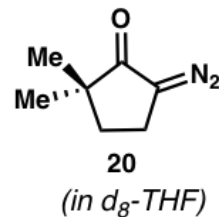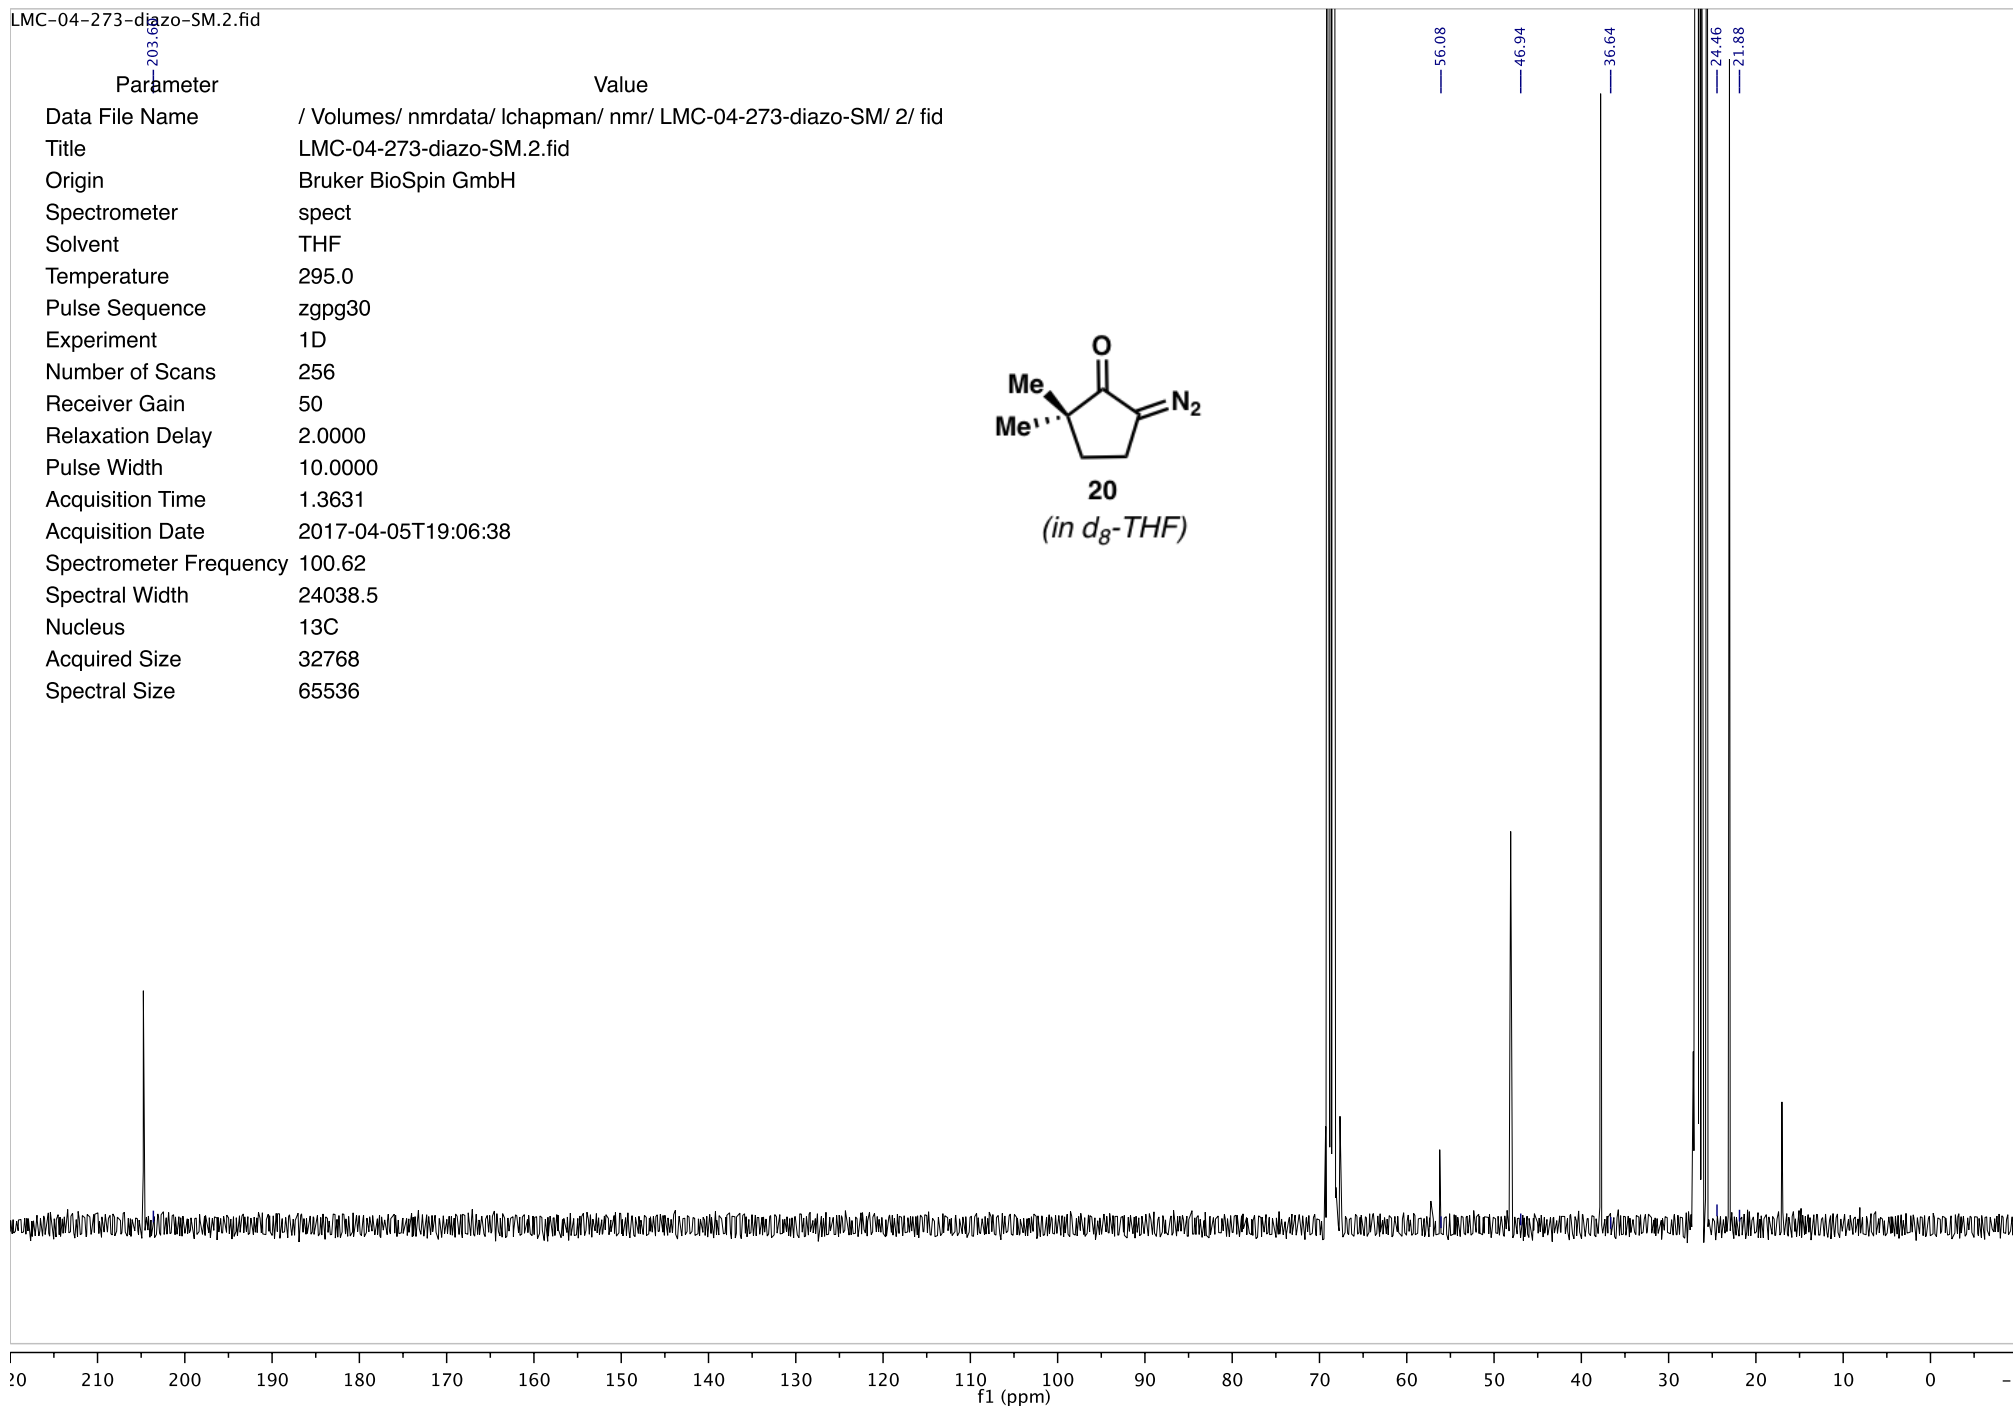

| Parameter              | Value                                                        |
|------------------------|--------------------------------------------------------------|
| Data File Name         | / Volumes/ nmrdata-1/ clacker/ nmr/ CRL_01_113_1_Nov/ 1/ fid |
| Title                  | CRL_01_113_1_Nov.1.fid                                       |
| Origin                 | Bruker BioSpin GmbH                                          |
| Solvent                | CDCl3                                                        |
| Temperature            | 295.0                                                        |
| Pulse Sequence         | zg30                                                         |
| Number of Scans        | 16                                                           |
| Receiver Gain          | 79                                                           |
| Relaxation Delay       | 1.0000                                                       |
| Pulse Width            | 11.7000                                                      |
| Acquisition Time       | 4.0894                                                       |
| Acquisition Date       | 2017-11-20T17:48:00                                          |
| Spectrometer Frequency | 400.13                                                       |
| Spectral Width         | 8012.8                                                       |
| Lowest Frequency       | -1522.5                                                      |
| Nucleus                | 1H                                                           |
| Acquired Size          | 32768                                                        |
| Spectral Size          | 65536                                                        |

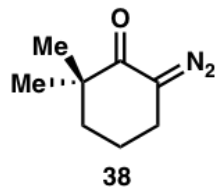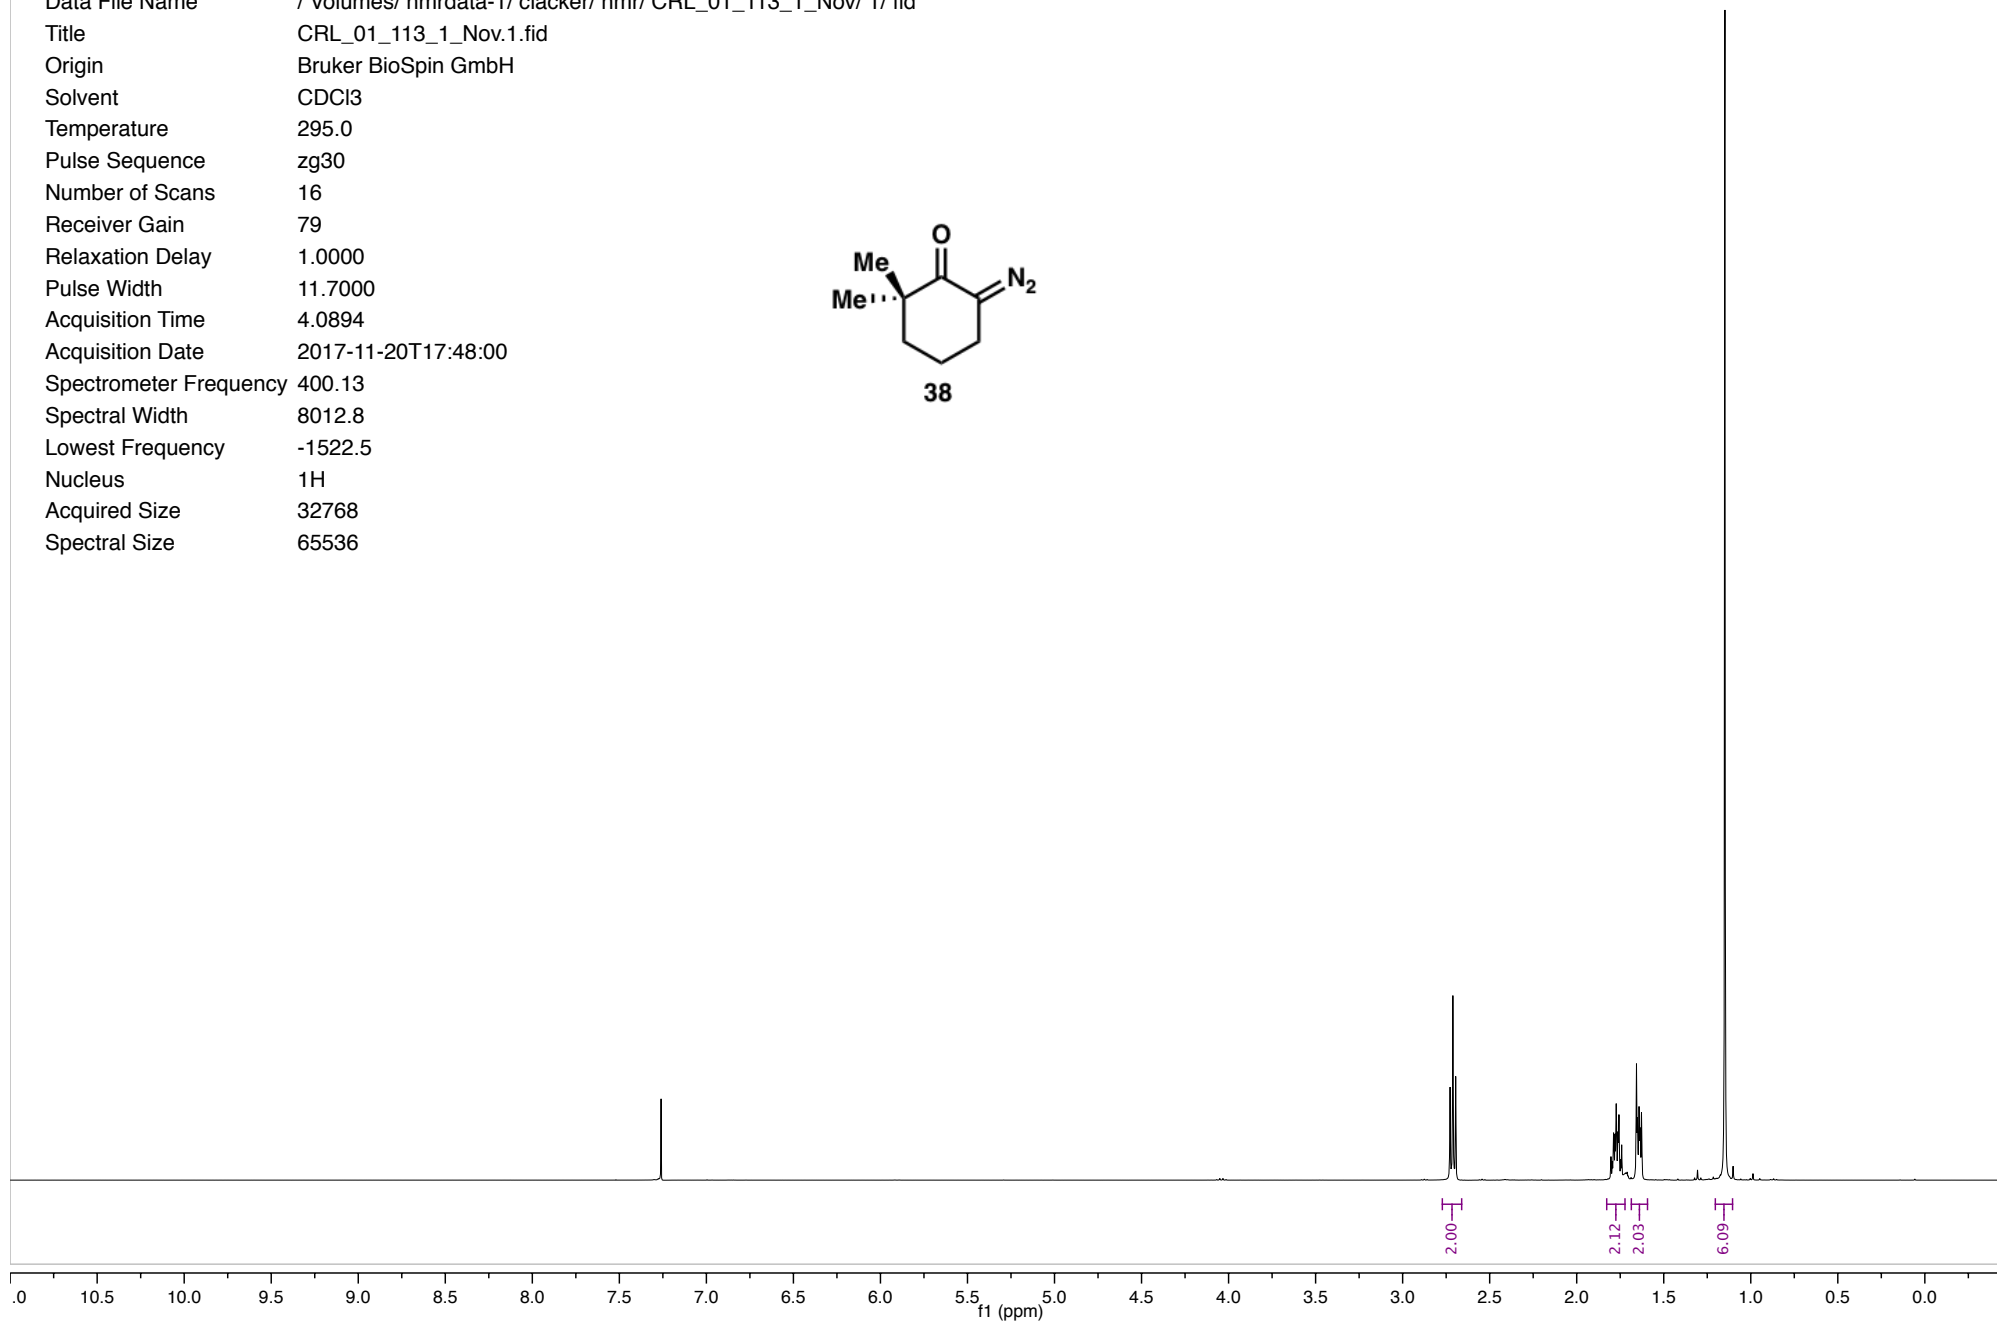

| Parameter              | Value                                                        |
|------------------------|--------------------------------------------------------------|
| Data File Name         | / Volumes/ nmrdata-1/ clacker/ nmr/ CRL_01_113_1_Nov/ 3/ fid |
| Title                  | CRL_01_113_1_Nov.3.fid                                       |
| Origin                 | Bruker BioSpin GmbH                                          |
| Solvent                | CDCl3                                                        |
| Temperature            | 295.0                                                        |
| Pulse Sequence         | zgpg30                                                       |
| Number of Scans        | 512                                                          |
| Receiver Gain          | 72                                                           |
| Relaxation Delay       | 1.0000                                                       |
| Pulse Width            | 10.0000                                                      |
| Acquisition Time       | 1.3631                                                       |
| Acquisition Date       | 2017-11-20T18:09:47                                          |
| Spectrometer Frequency | 100.62                                                       |
| Spectral Width         | 24038.5                                                      |
| Lowest Frequency       | -1935.1                                                      |
| Nucleus                | 13C                                                          |
| Acquired Size          | 32768                                                        |
| Spectral Size          | 65536                                                        |

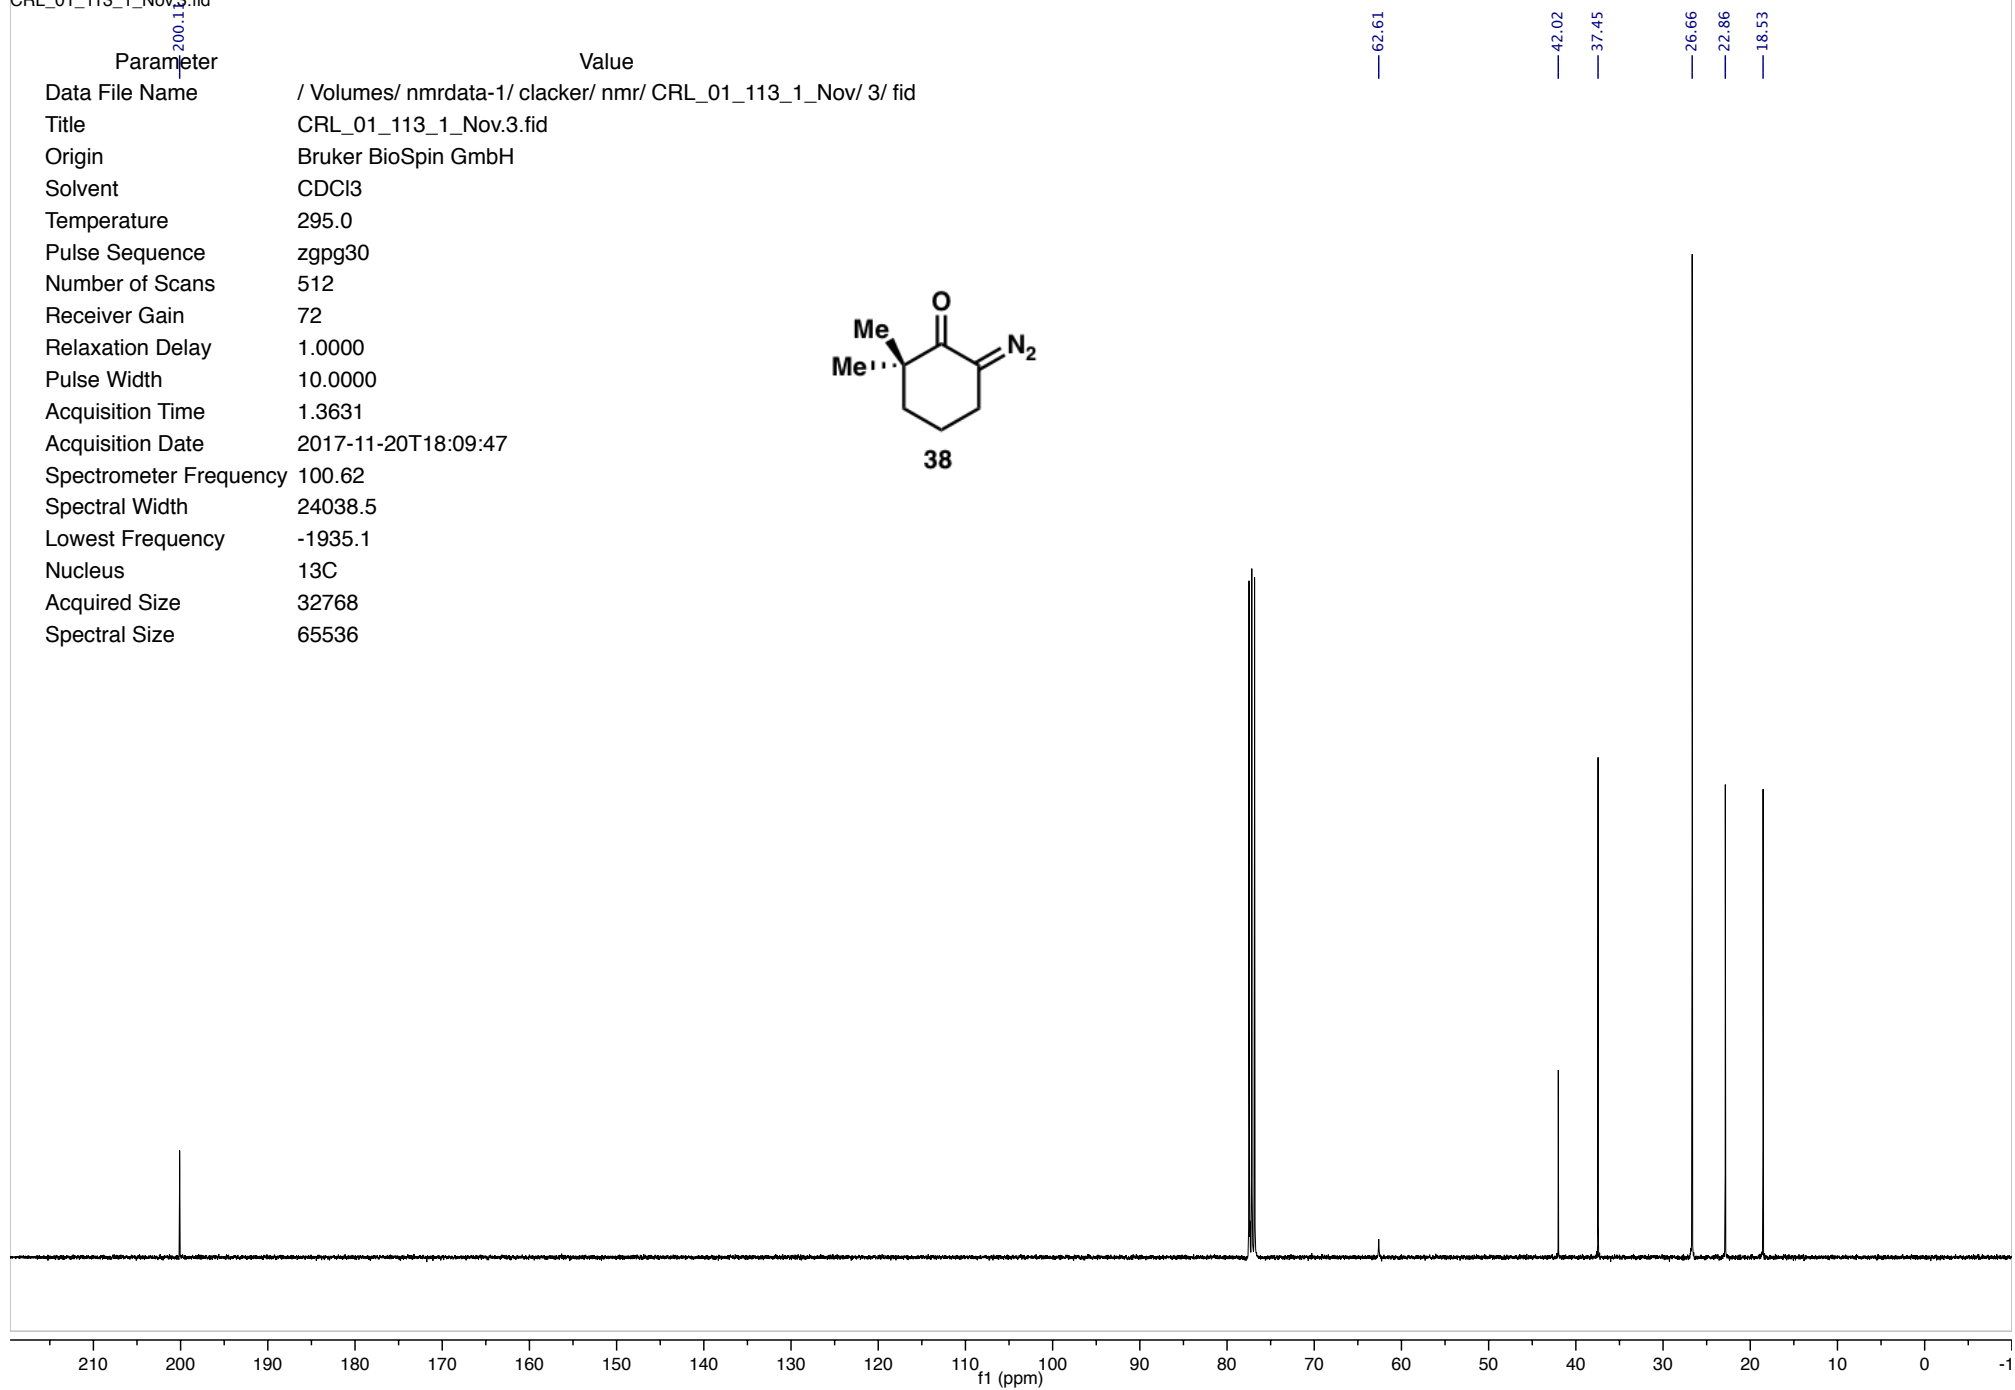

| Parameter              | Value                                                        |
|------------------------|--------------------------------------------------------------|
| Data File Name         | / Volumes/ nmrdata-1/ clacker/ nmr/ CRL_01_203_1_Nov/ 1/ fid |
| Title                  | CRL_01_203_1_Nov.1.fid                                       |
| Origin                 | Bruker BioSpin GmbH                                          |
| Solvent                | CDCl3                                                        |
| Temperature            | 294.9                                                        |
| Pulse Sequence         | zg30                                                         |
| Number of Scans        | 16                                                           |
| Receiver Gain          | 88                                                           |
| Relaxation Delay       | 1.0000                                                       |
| Pulse Width            | 11.7000                                                      |
| Acquisition Time       | 4.0894                                                       |
| Acquisition Date       | 2017-11-20T18:14:57                                          |
| Spectrometer Frequency | 400.13                                                       |
| Spectral Width         | 8012.8                                                       |
| Lowest Frequency       | -1520.9                                                      |
| Nucleus                | 1H                                                           |
| Acquired Size          | 32768                                                        |
| Spectral Size          | 65536                                                        |

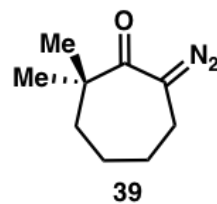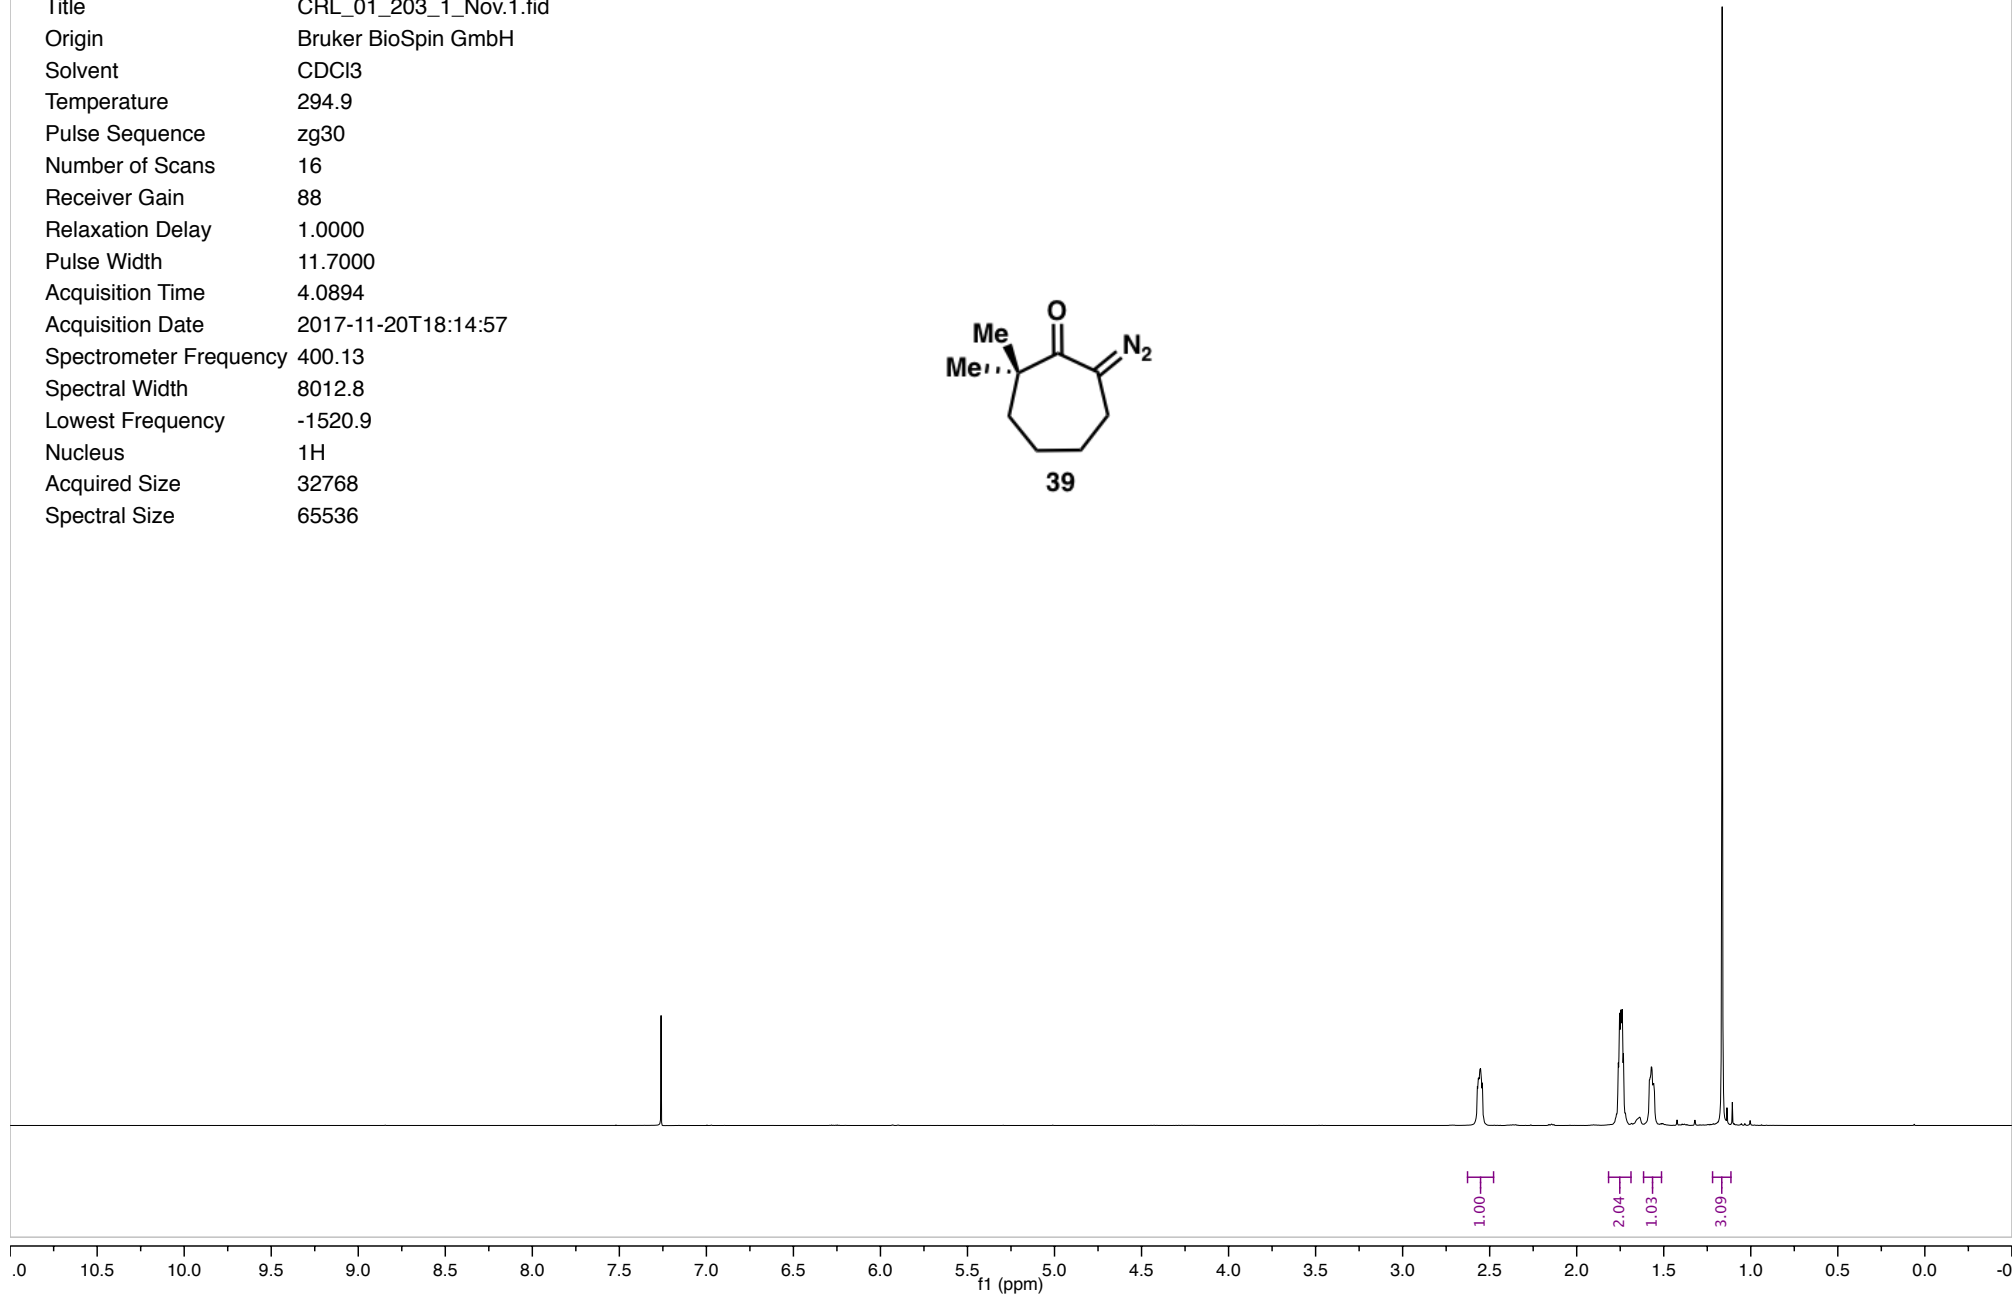

| Parameter              | Value                                                 |
|------------------------|-------------------------------------------------------|
| Data File Name         | /Volumes/nmrdata-1/clacker/nmr/CRL_01_203_1_Nov/3/fid |
| Title                  | CRL_01_203_1_Nov.3.fid                                |
| Origin                 | Bruker BioSpin GmbH                                   |
| Solvent                | CDCl <sub>3</sub>                                     |
| Temperature            | 295.0                                                 |
| Pulse Sequence         | zgpg30                                                |
| Number of Scans        | 512                                                   |
| Receiver Gain          | 88                                                    |
| Relaxation Delay       | 1.0000                                                |
| Pulse Width            | 10.0000                                               |
| Acquisition Time       | 1.3631                                                |
| Acquisition Date       | 2017-11-20T18:36:43                                   |
| Spectrometer Frequency | 100.62                                                |
| Spectral Width         | 24038.5                                               |
| Lowest Frequency       | -1933.7                                               |
| Nucleus                | <sup>13</sup> C                                       |
| Acquired Size          | 32768                                                 |
| Spectral Size          | 65536                                                 |

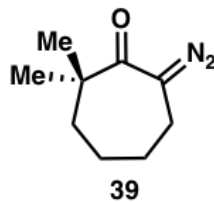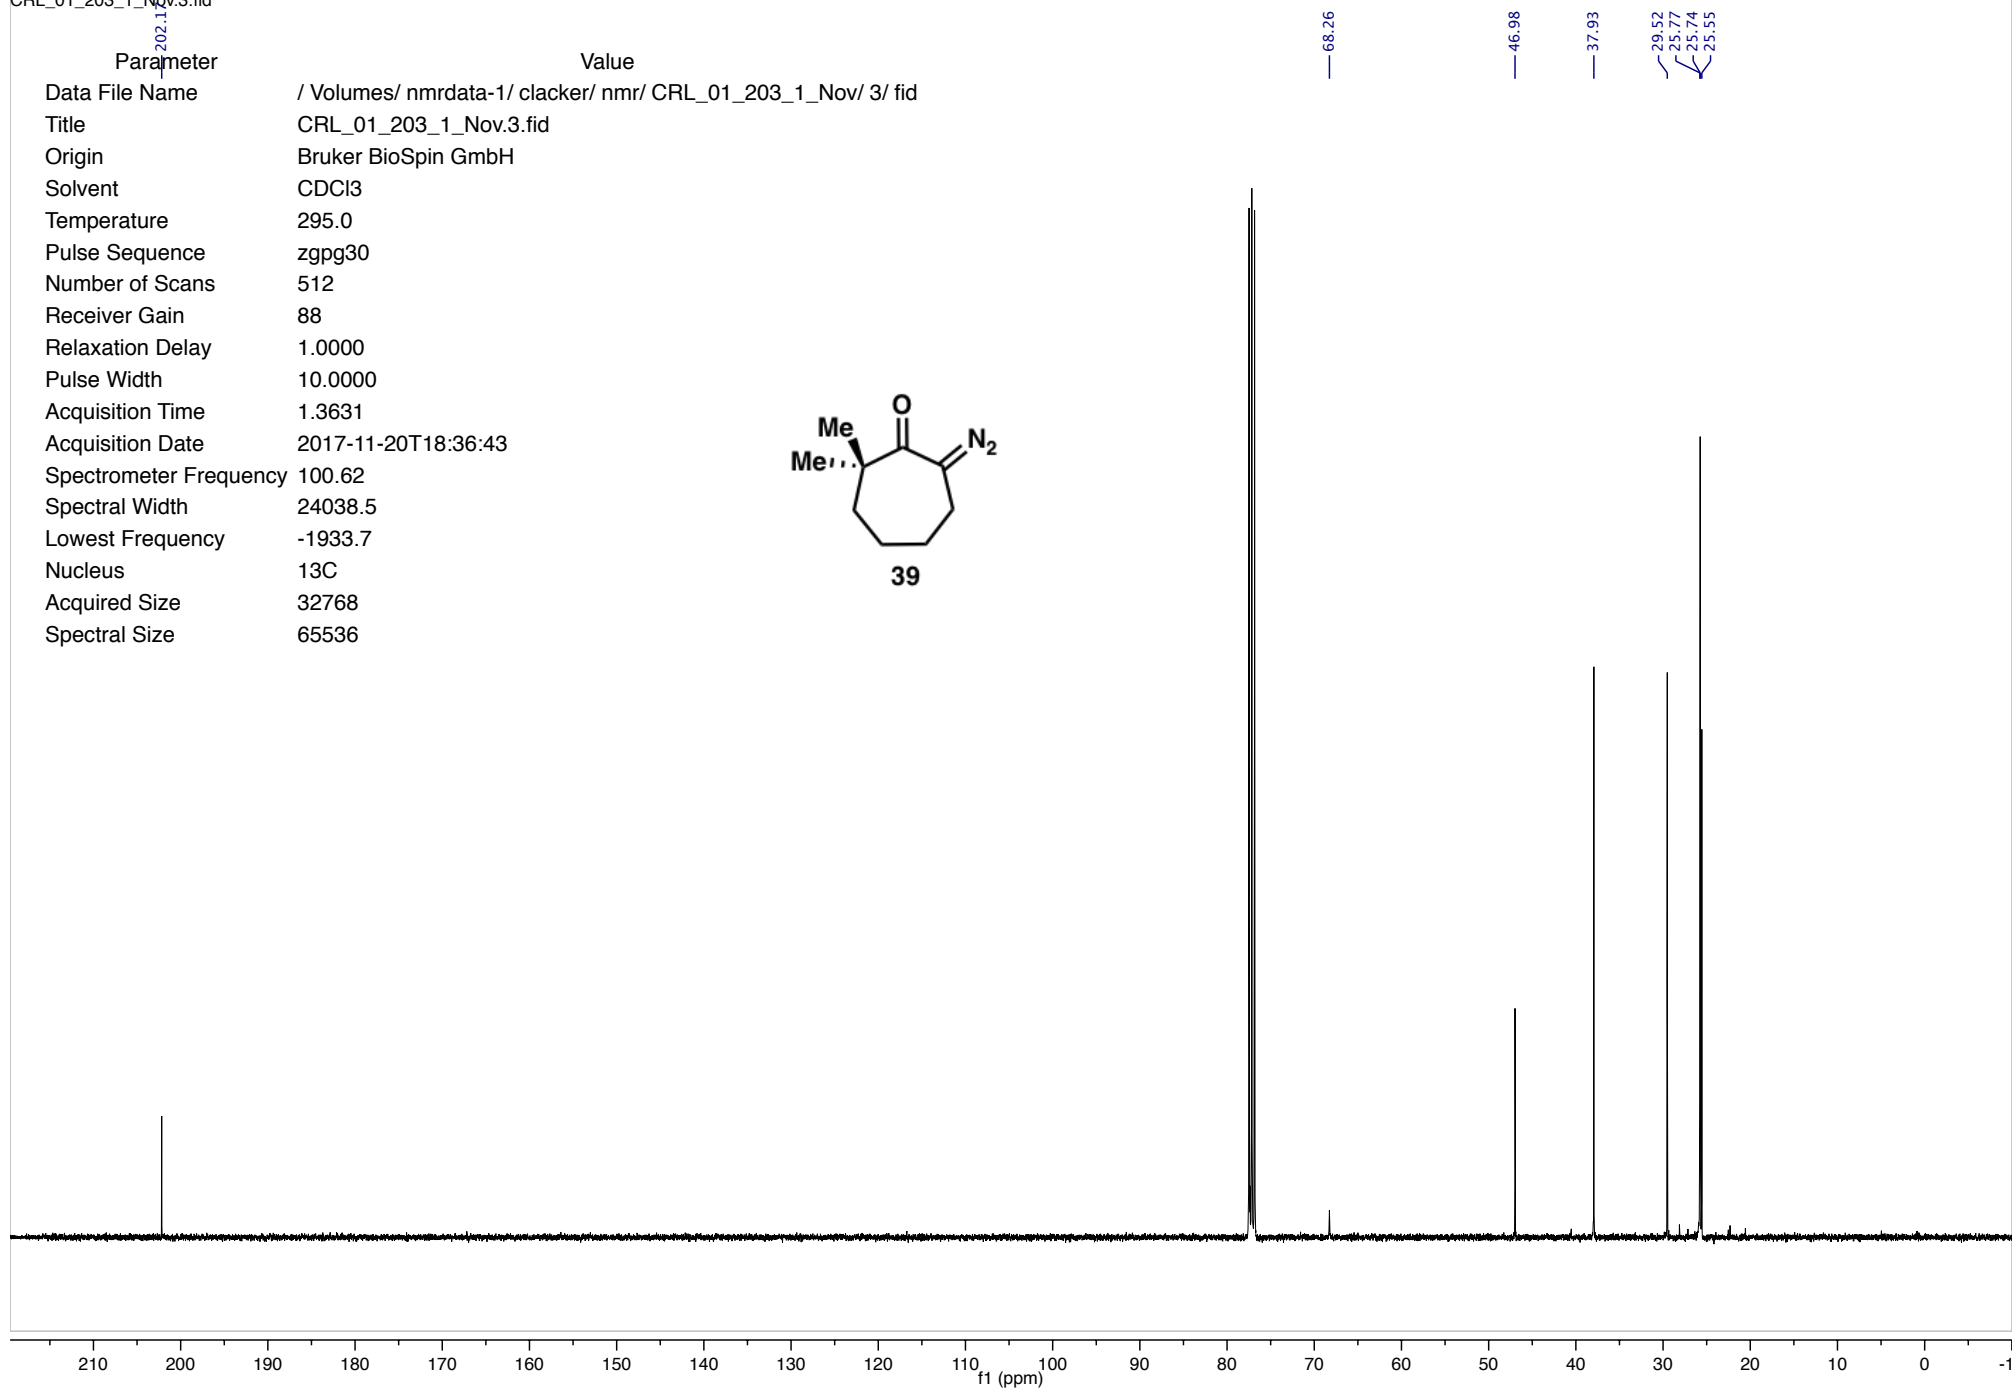

| Parameter              | Value                                                            |
|------------------------|------------------------------------------------------------------|
| Data File Name         | / Volumes/ nmrdata/ jbeck/ nmr/ JCB_cyclobutamide_060916/ 1/ fid |
| Title                  | JCB_cyclobutamide_060916.1.fid                                   |
| Origin                 | Bruker BioSpin GmbH                                              |
| Solvent                | CDCl3                                                            |
| Temperature            | 295.0                                                            |
| Pulse Sequence         | zg30                                                             |
| Number of Scans        | 1                                                                |
| Receiver Gain          | 197                                                              |
| Relaxation Delay       | 1.0000                                                           |
| Pulse Width            | 11.7000                                                          |
| Acquisition Time       | 4.0894                                                           |
| Acquisition Date       | 2016-06-09T16:38:44                                              |
| Spectrometer Frequency | 400.13                                                           |
| Spectral Width         | 8012.8                                                           |
| Lowest Frequency       | -1545.6                                                          |
| Nucleus                | 1H                                                               |
| Acquired Size          | 32768                                                            |
| Spectral Size          | 65536                                                            |

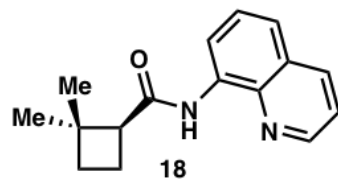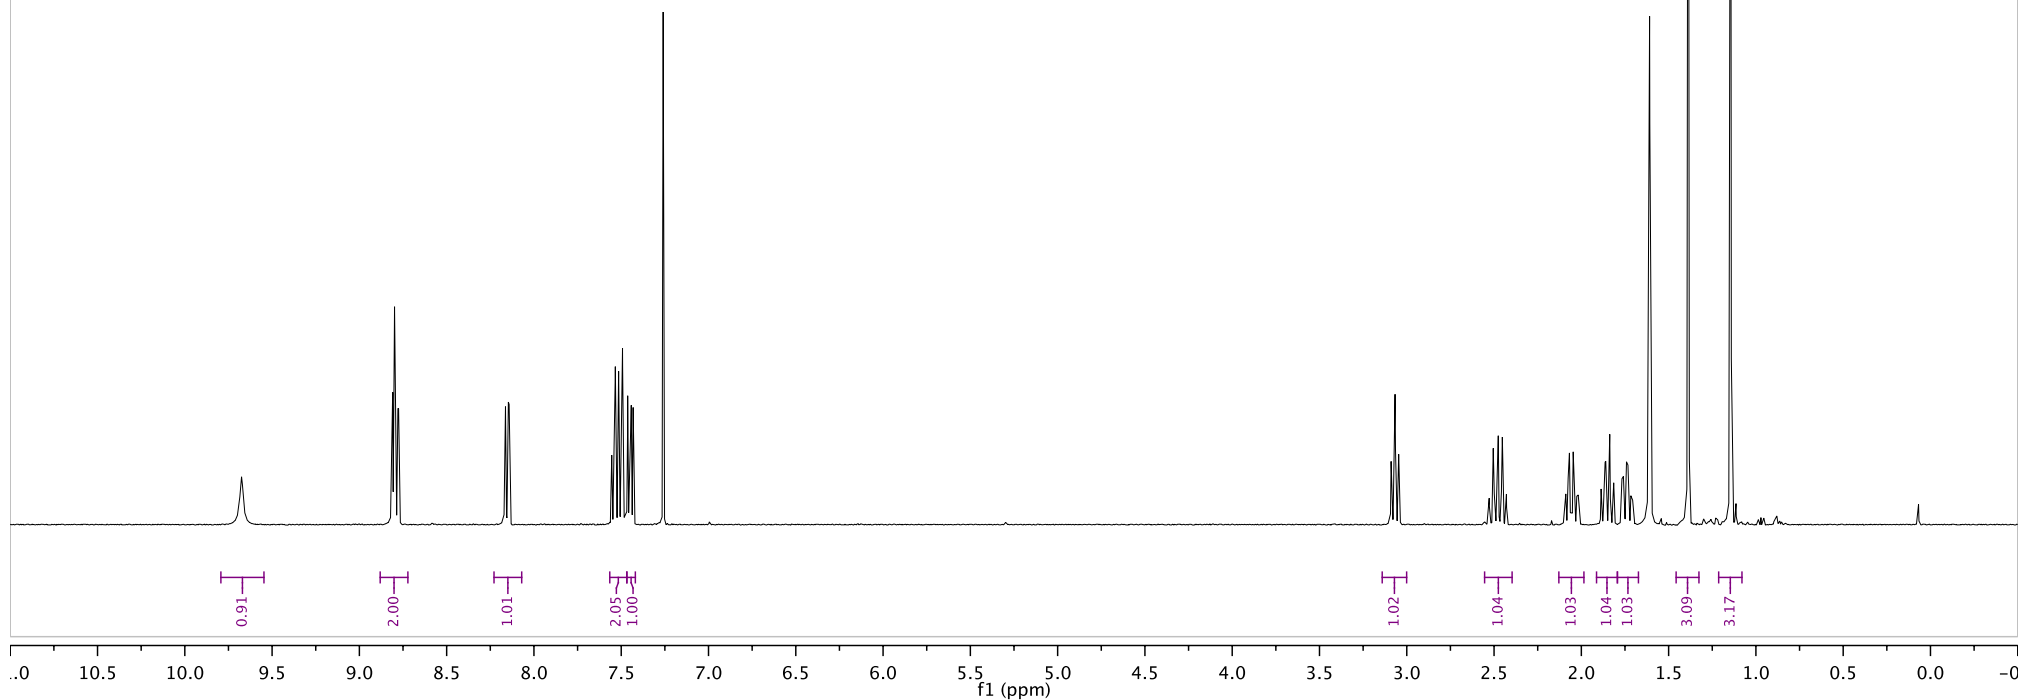



| Parameter              | Value                                                            |
|------------------------|------------------------------------------------------------------|
| Data File Name         | / Volumes/ nmrdata/ jbeck/ nmr/ JCB_cyclobutamide_060916/ 3/ fid |
| Title                  | JCB_cyclobutamide_060916.3.fid                                   |
| Origin                 | Bruker BioSpin GmbH                                              |
| Solvent                | CDCl3                                                            |
| Temperature            | 294.9                                                            |
| Pulse Sequence         | zgpg30                                                           |
| Number of Scans        | 441                                                              |
| Receiver Gain          | 79                                                               |
| Relaxation Delay       | 2.0000                                                           |
| Pulse Width            | 10.0000                                                          |
| Acquisition Time       | 1.3631                                                           |
| Acquisition Date       | 2016-06-09T17:10:30                                              |
| Spectrometer Frequency | 100.62                                                           |
| Spectral Width         | 24038.5                                                          |
| Lowest Frequency       | -1945.5                                                          |
| Nucleus                | 13C                                                              |
| Acquired Size          | 32768                                                            |
| Spectral Size          | 65536                                                            |

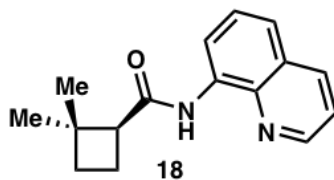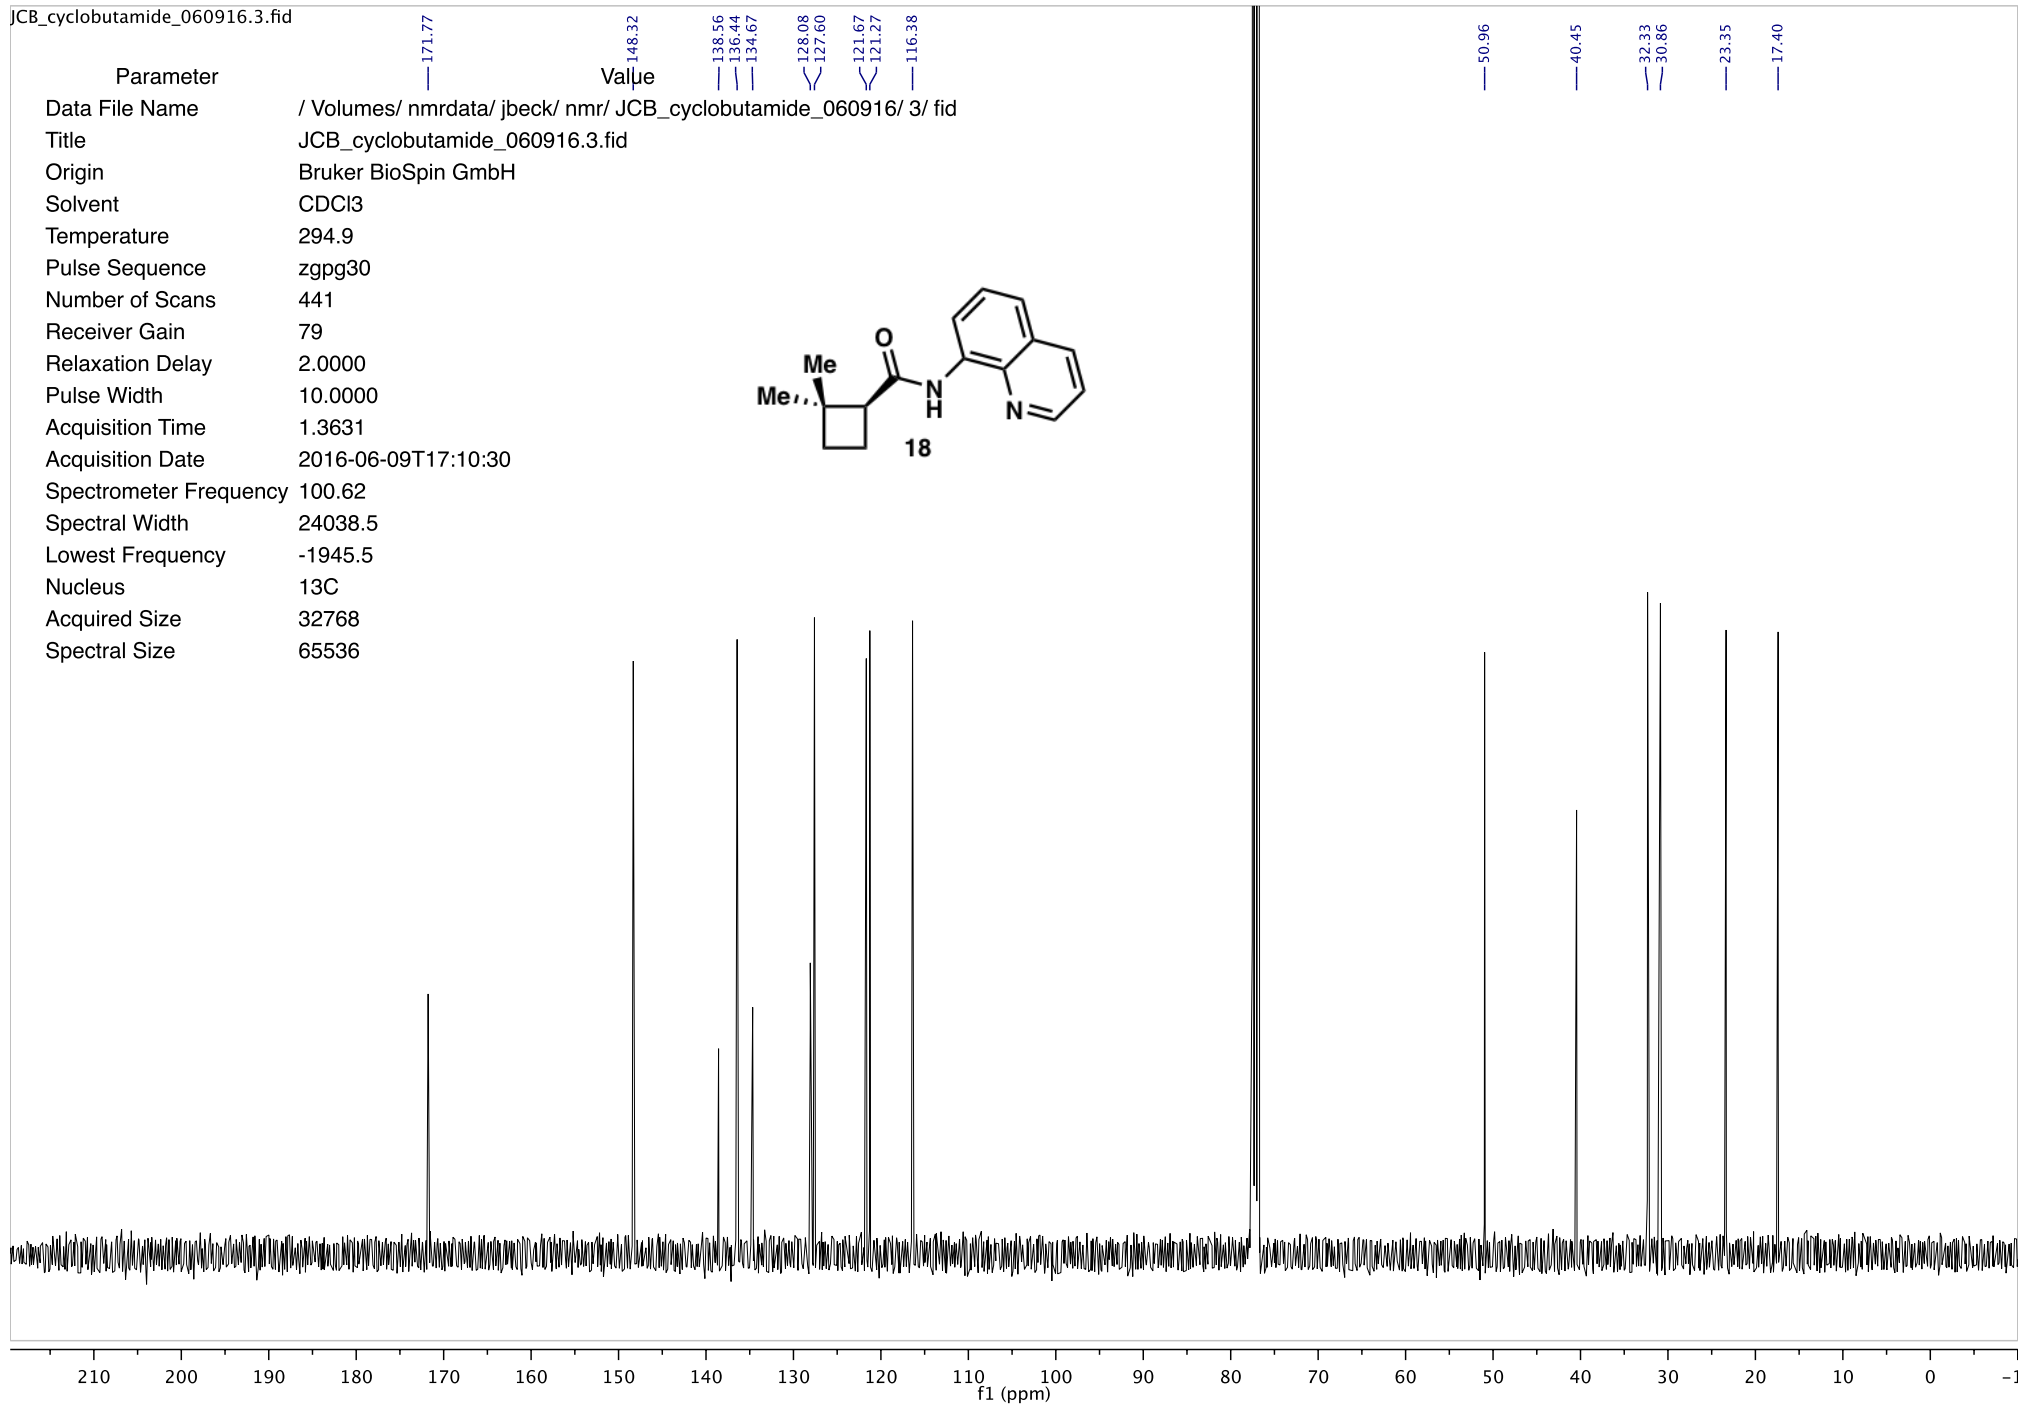

| Parameter              | Value                                               |
|------------------------|-----------------------------------------------------|
| Data File Name         | /Volumes/nmrdata-1/clacker/nmr/CRL_01_074_2/ 2/ fid |
| Title                  | CRL_01_074_2.2.fid                                  |
| Origin                 | Bruker BioSpin GmbH                                 |
| Solvent                | CDCl3                                               |
| Temperature            | 294.9                                               |
| Pulse Sequence         | zg30                                                |
| Number of Scans        | 1                                                   |
| Receiver Gain          | 197                                                 |
| Relaxation Delay       | 1.0000                                              |
| Pulse Width            | 11.7000                                             |
| Acquisition Time       | 4.0894                                              |
| Acquisition Date       | 2017-04-19T21:04:33                                 |
| Spectrometer Frequency | 400.13                                              |
| Spectral Width         | 8012.8                                              |
| Lowest Frequency       | -1555.6                                             |
| Nucleus                | 1H                                                  |
| Acquired Size          | 32768                                               |
| Spectral Size          | 65536                                               |

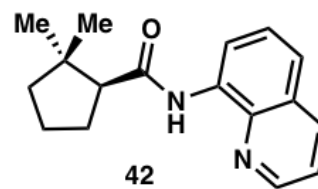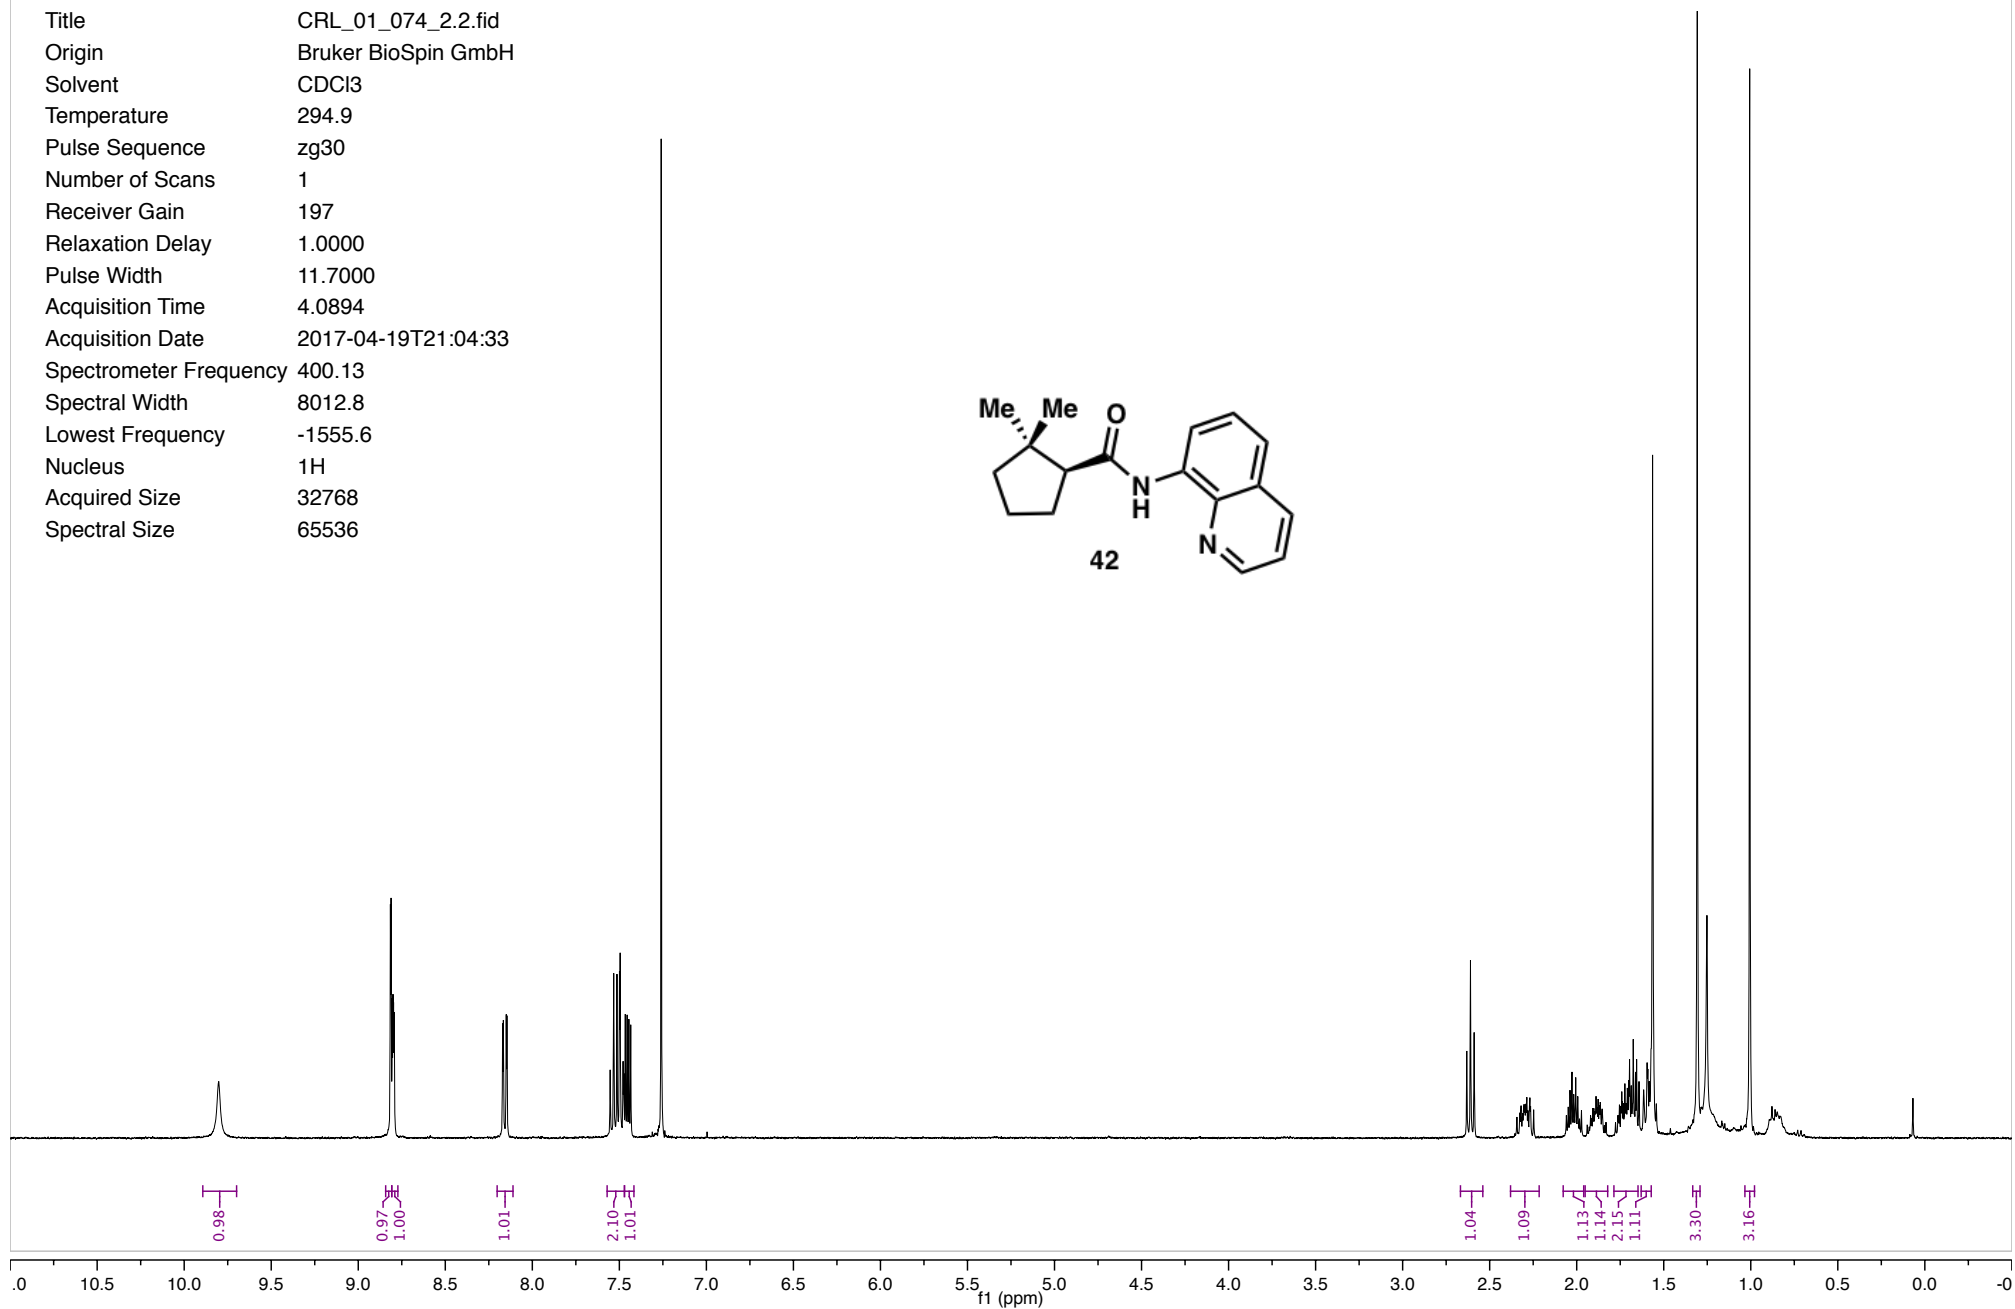

| Parameter              | Value                                                   |
|------------------------|---------------------------------------------------------|
| Data File Name         | /Volumes/nmrdata-1/clacker/nmr/CRL_01_074_2_1scan/2/fid |
| Title                  | CRL_01_074_2_1scan.2.fid                                |
| Origin                 | Bruker BioSpin GmbH                                     |
| Solvent                | CDCl3                                                   |
| Temperature            | 294.9                                                   |
| Pulse Sequence         | zgpg30                                                  |
| Number of Scans        | 1024                                                    |
| Receiver Gain          | 79                                                      |
| Relaxation Delay       | 2.0000                                                  |
| Pulse Width            | 10.0000                                                 |
| Acquisition Time       | 1.3631                                                  |
| Acquisition Date       | 2017-04-19T22:06:04                                     |
| Spectrometer Frequency | 100.62                                                  |
| Spectral Width         | 24038.5                                                 |
| Lowest Frequency       | -1931.5                                                 |
| Nucleus                | <sup>13</sup> C                                         |
| Acquired Size          | 32768                                                   |
| Spectral Size          | 65536                                                   |

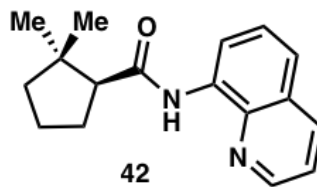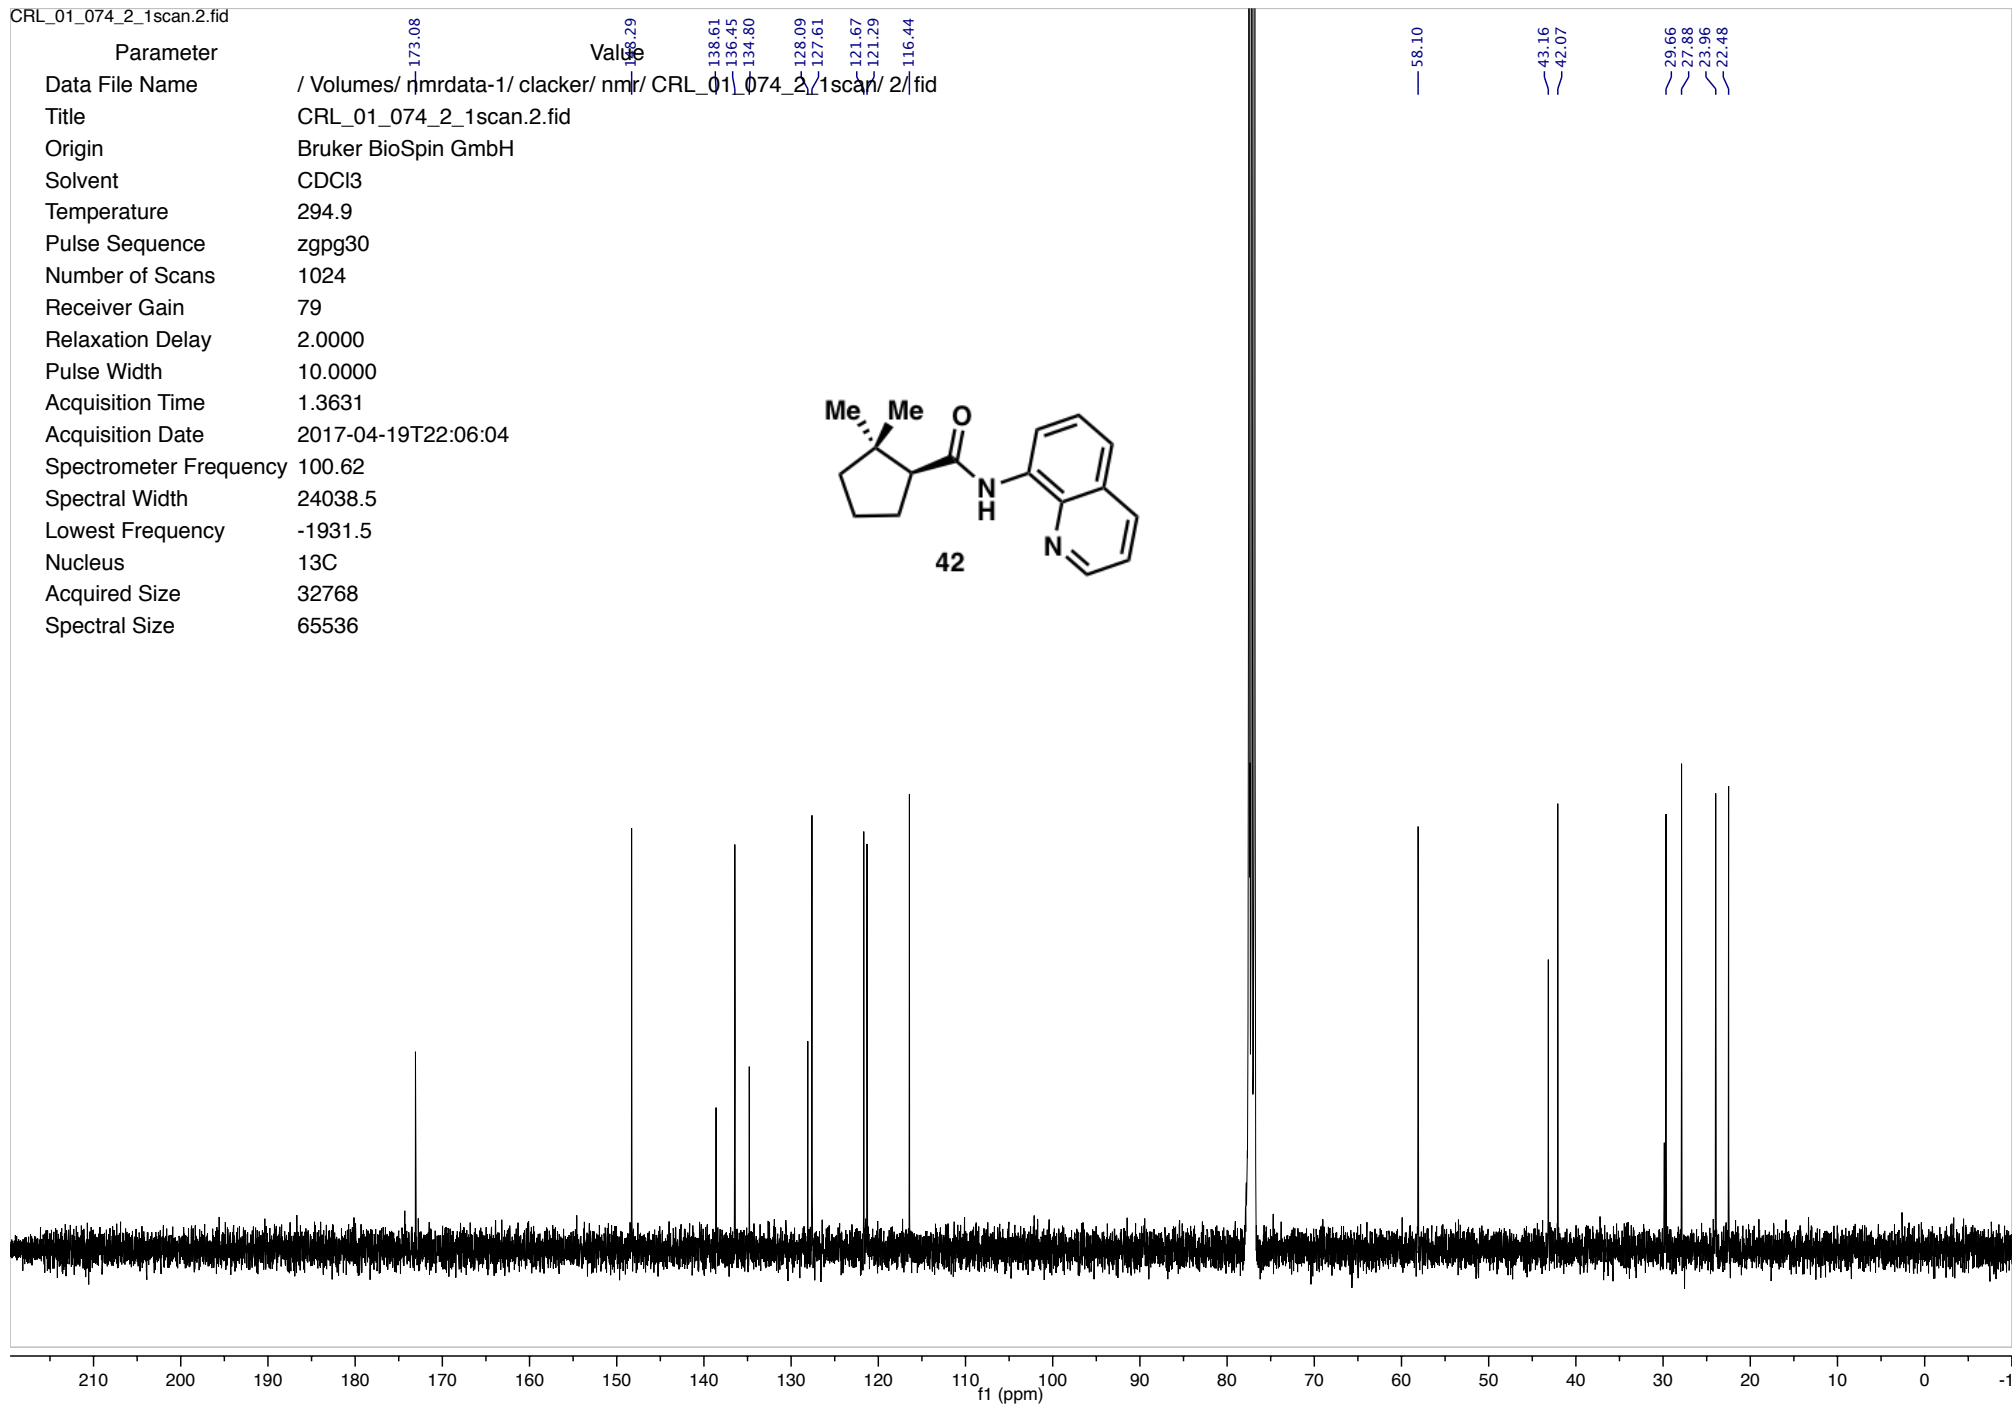

| Parameter              | Value                                                    |
|------------------------|----------------------------------------------------------|
| Data File Name         | / Volumes/ nmrdata-1/ clacker/ nmr/ CRL_01_074_4/ 1/ fid |
| Title                  | CRL_01_074_4.1.fid                                       |
| Origin                 | Bruker BioSpin GmbH                                      |
| Solvent                | CDCl3                                                    |
| Temperature            | 295.0                                                    |
| Pulse Sequence         | zg30                                                     |
| Number of Scans        | 16                                                       |
| Receiver Gain          | 197                                                      |
| Relaxation Delay       | 1.0000                                                   |
| Pulse Width            | 11.7000                                                  |
| Acquisition Time       | 4.0894                                                   |
| Acquisition Date       | 2017-04-19T12:22:42                                      |
| Spectrometer Frequency | 400.13                                                   |
| Spectral Width         | 8012.8                                                   |
| Lowest Frequency       | -1555.6                                                  |
| Nucleus                | 1H                                                       |
| Acquired Size          | 32768                                                    |
| Spectral Size          | 65536                                                    |

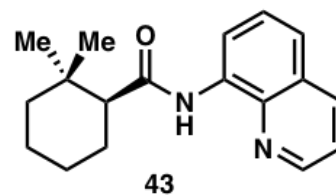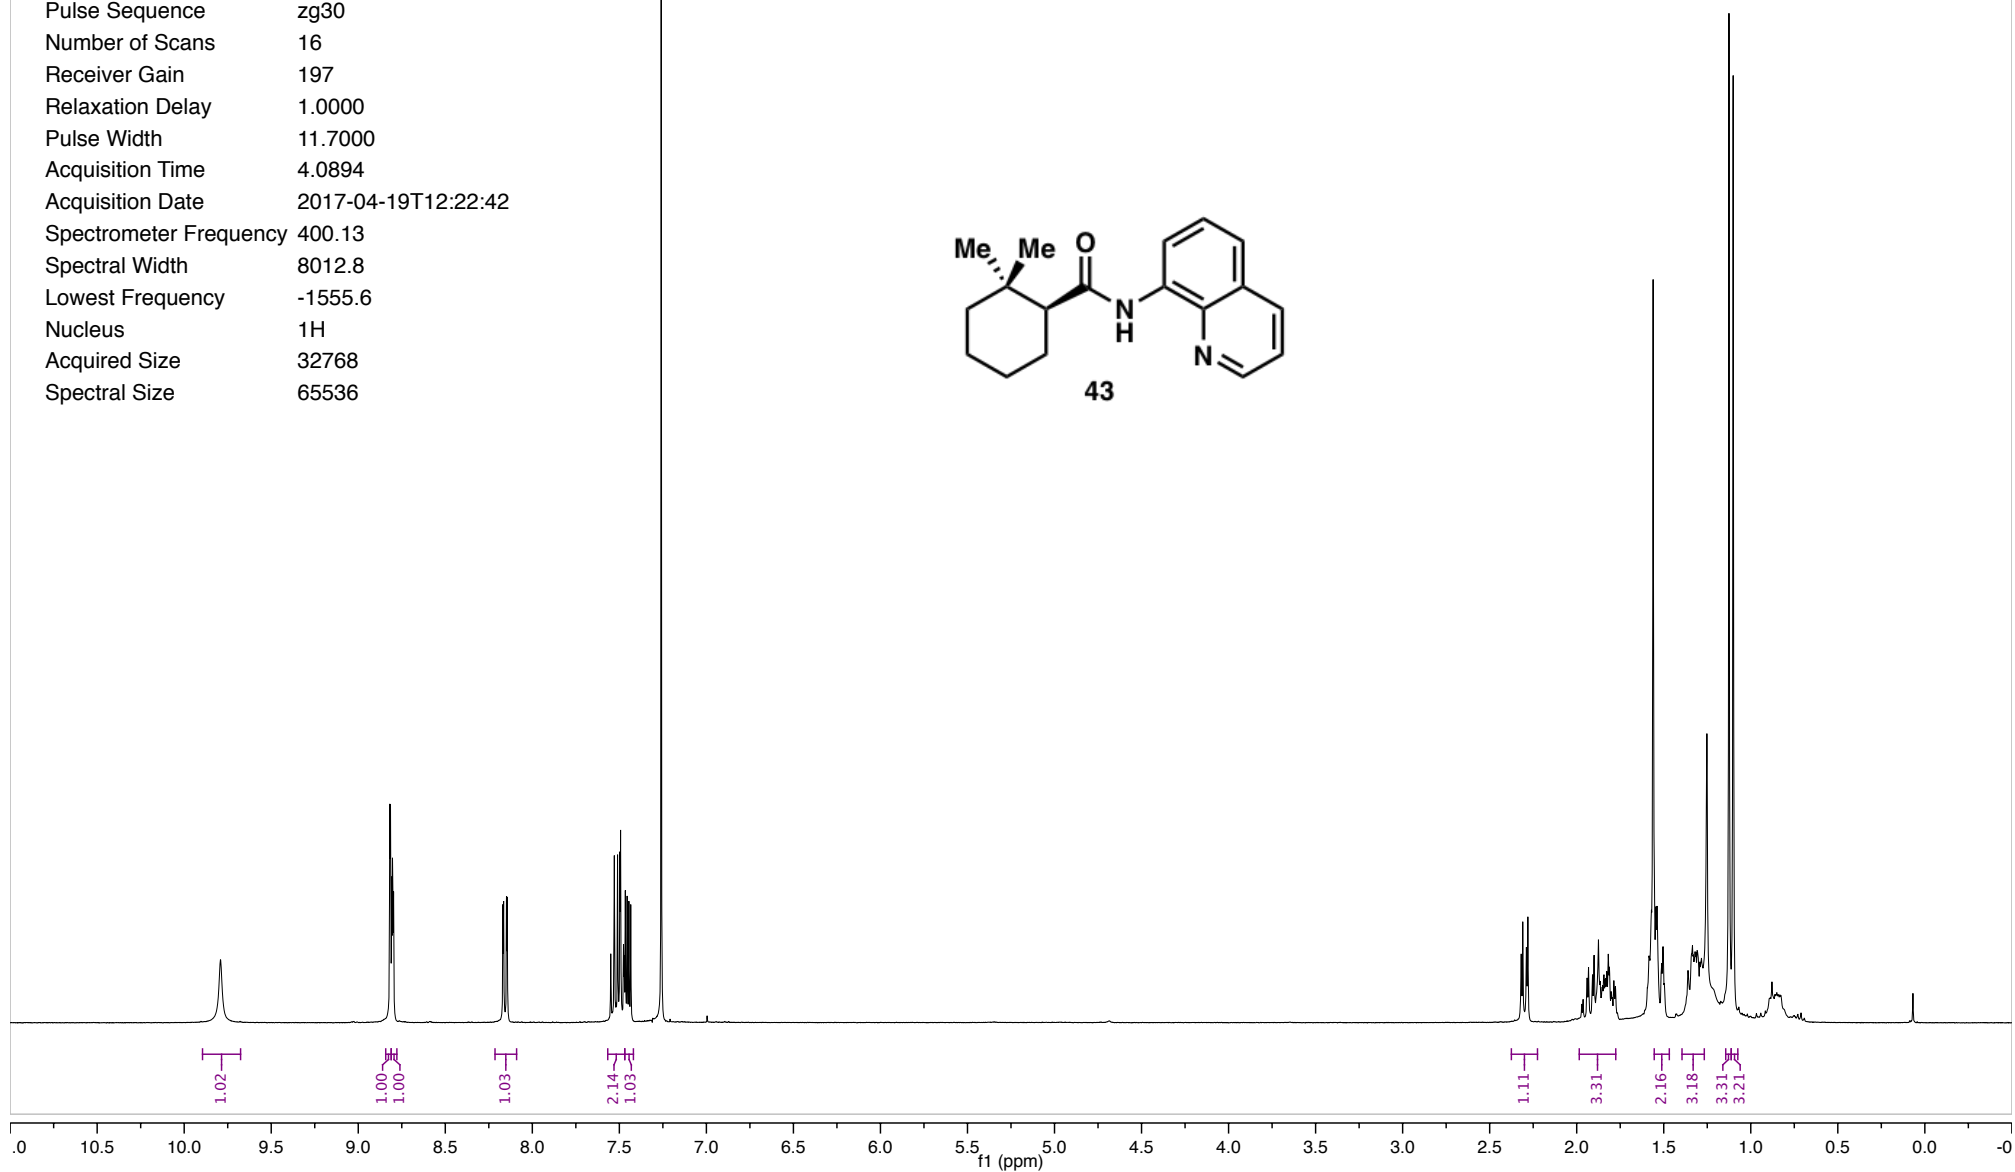

## Parameter

|                        |                                                            |
|------------------------|------------------------------------------------------------|
| Data File Name         | / Volumes/ nmrdata-1/ clacker/ nmr/ CRL_01_074_4_C/ 1/ fid |
| Title                  | CRL_01_074_4_C.1.fid                                       |
| Origin                 | Bruker BioSpin GmbH                                        |
| Solvent                | CDCl <sub>3</sub>                                          |
| Temperature            | 295.0                                                      |
| Pulse Sequence         | zgpg30                                                     |
| Number of Scans        | 1024                                                       |
| Receiver Gain          | 79                                                         |
| Relaxation Delay       | 2.0000                                                     |
| Pulse Width            | 10.0000                                                    |
| Acquisition Time       | 1.3631                                                     |
| Acquisition Date       | 2017-04-20T00:15:34                                        |
| Spectrometer Frequency | 100.62                                                     |
| Spectral Width         | 24038.5                                                    |
| Lowest Frequency       | -1931.5                                                    |
| Nucleus                | <sup>13</sup> C                                            |
| Acquired Size          | 32768                                                      |
| Spectral Size          | 65536                                                      |

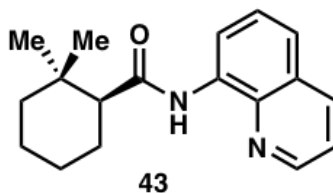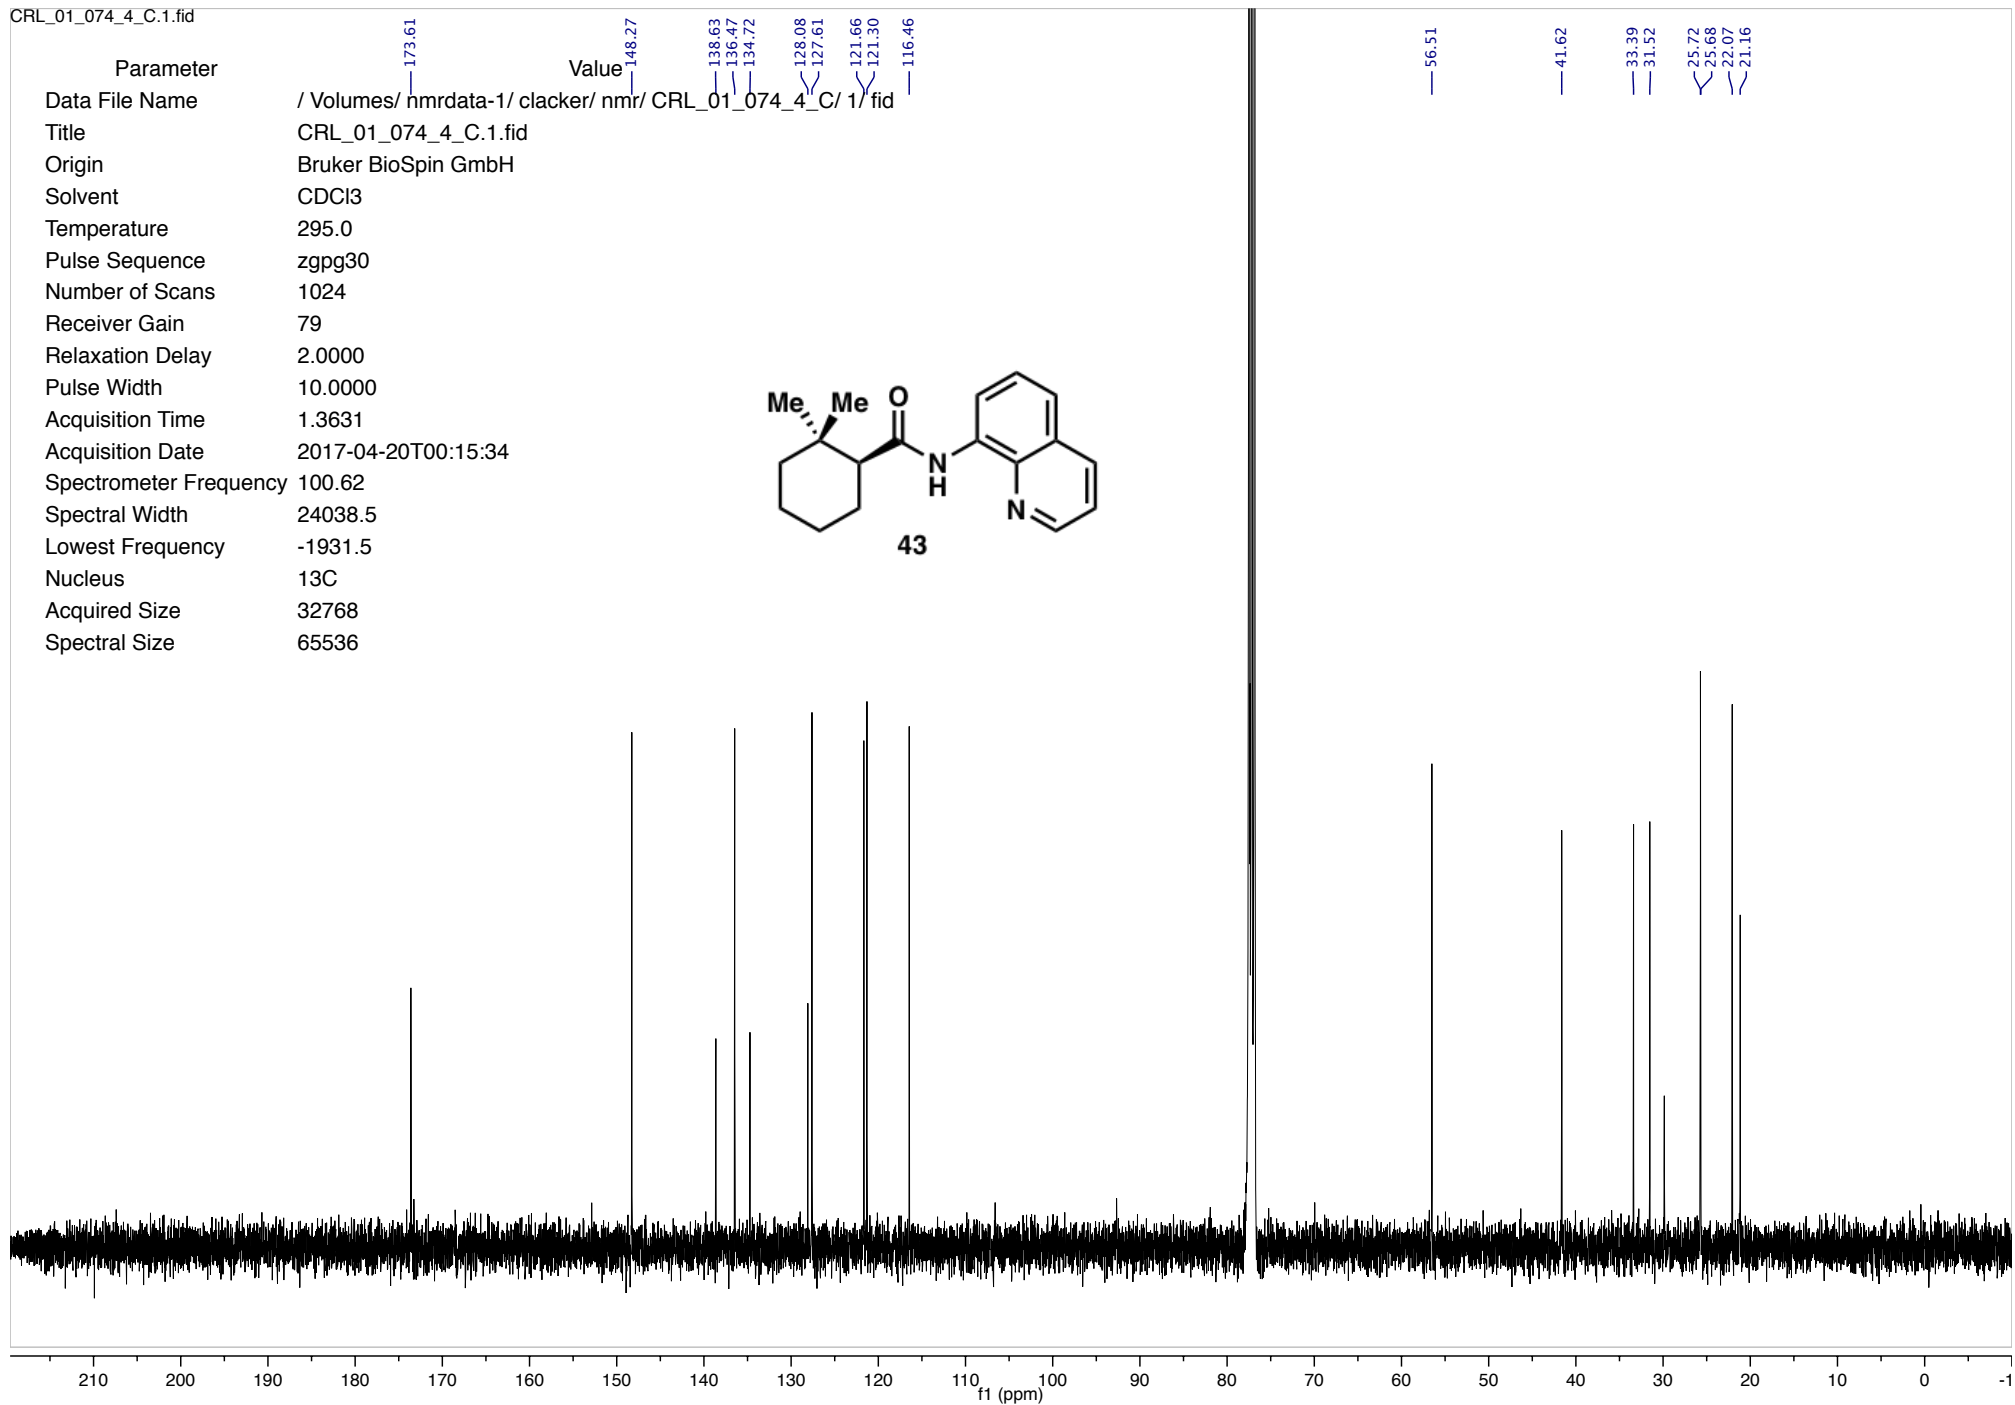

| Parameter              | Value                                              |
|------------------------|----------------------------------------------------|
| Data File Name         | /Volumes/nmrdata-1/clacker/nmr/CRL_01_120A_1/1/fid |
| Title                  | CRL_01_120A_1.1.fid                                |
| Origin                 | Bruker BioSpin GmbH                                |
| Solvent                | CDCl3                                              |
| Temperature            | 295.0                                              |
| Pulse Sequence         | zg30                                               |
| Number of Scans        | 1                                                  |
| Receiver Gain          | 197                                                |
| Relaxation Delay       | 1.0000                                             |
| Pulse Width            | 11.7000                                            |
| Acquisition Time       | 4.0894                                             |
| Acquisition Date       | 2017-06-12T17:08:01                                |
| Spectrometer Frequency | 400.13                                             |
| Spectral Width         | 8012.8                                             |
| Lowest Frequency       | -1555.6                                            |
| Nucleus                | <sup>1</sup> H                                     |
| Acquired Size          | 32768                                              |
| Spectral Size          | 65536                                              |

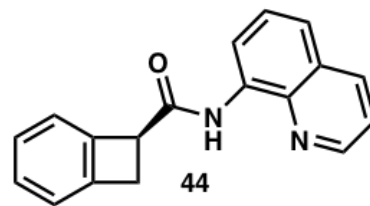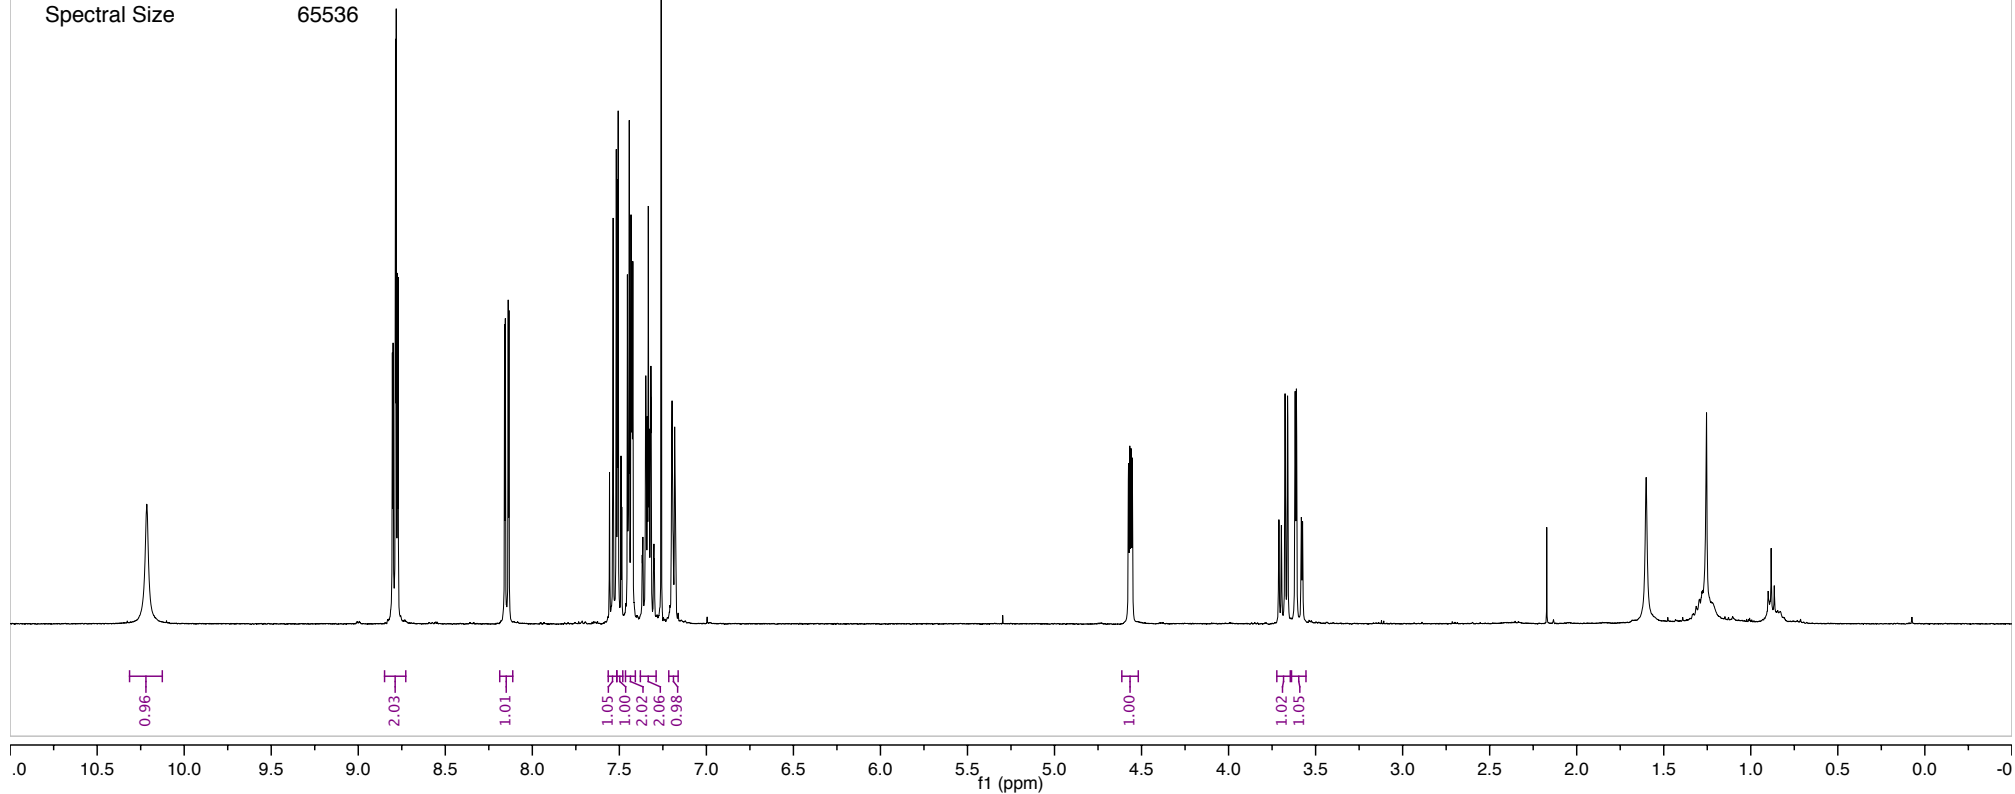

## Parameter

|                        |                                                           |
|------------------------|-----------------------------------------------------------|
| Data File Name         | / Volumes/ nmrdata-1/ clacker/ nmr/ CRL_01_120A_1/ 2/ fid |
| Title                  | CRL_01_120A_1.2.fid                                       |
| Origin                 | Bruker BioSpin GmbH                                       |
| Solvent                | CDCl3                                                     |
| Temperature            | 295.0                                                     |
| Pulse Sequence         | zgpg30                                                    |
| Number of Scans        | 1024                                                      |
| Receiver Gain          | 72                                                        |
| Relaxation Delay       | 2.0000                                                    |
| Pulse Width            | 10.0000                                                   |
| Acquisition Time       | 1.3631                                                    |
| Acquisition Date       | 2017-06-12T18:07:42                                       |
| Spectrometer Frequency | 100.62                                                    |
| Spectral Width         | 24038.5                                                   |
| Lowest Frequency       | -1933.9                                                   |
| Nucleus                | <sup>13</sup> C                                           |
| Acquired Size          | 32768                                                     |
| Spectral Size          | 65536                                                     |

170.55

Value

148.41  
144.73  
142.92  
138.67  
136.41  
134.49  
128.57  
128.02  
127.76  
127.51  
123.45  
122.70  
121.73  
121.71  
116.54

49.29

35.20

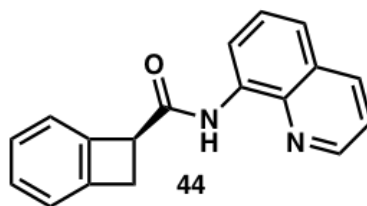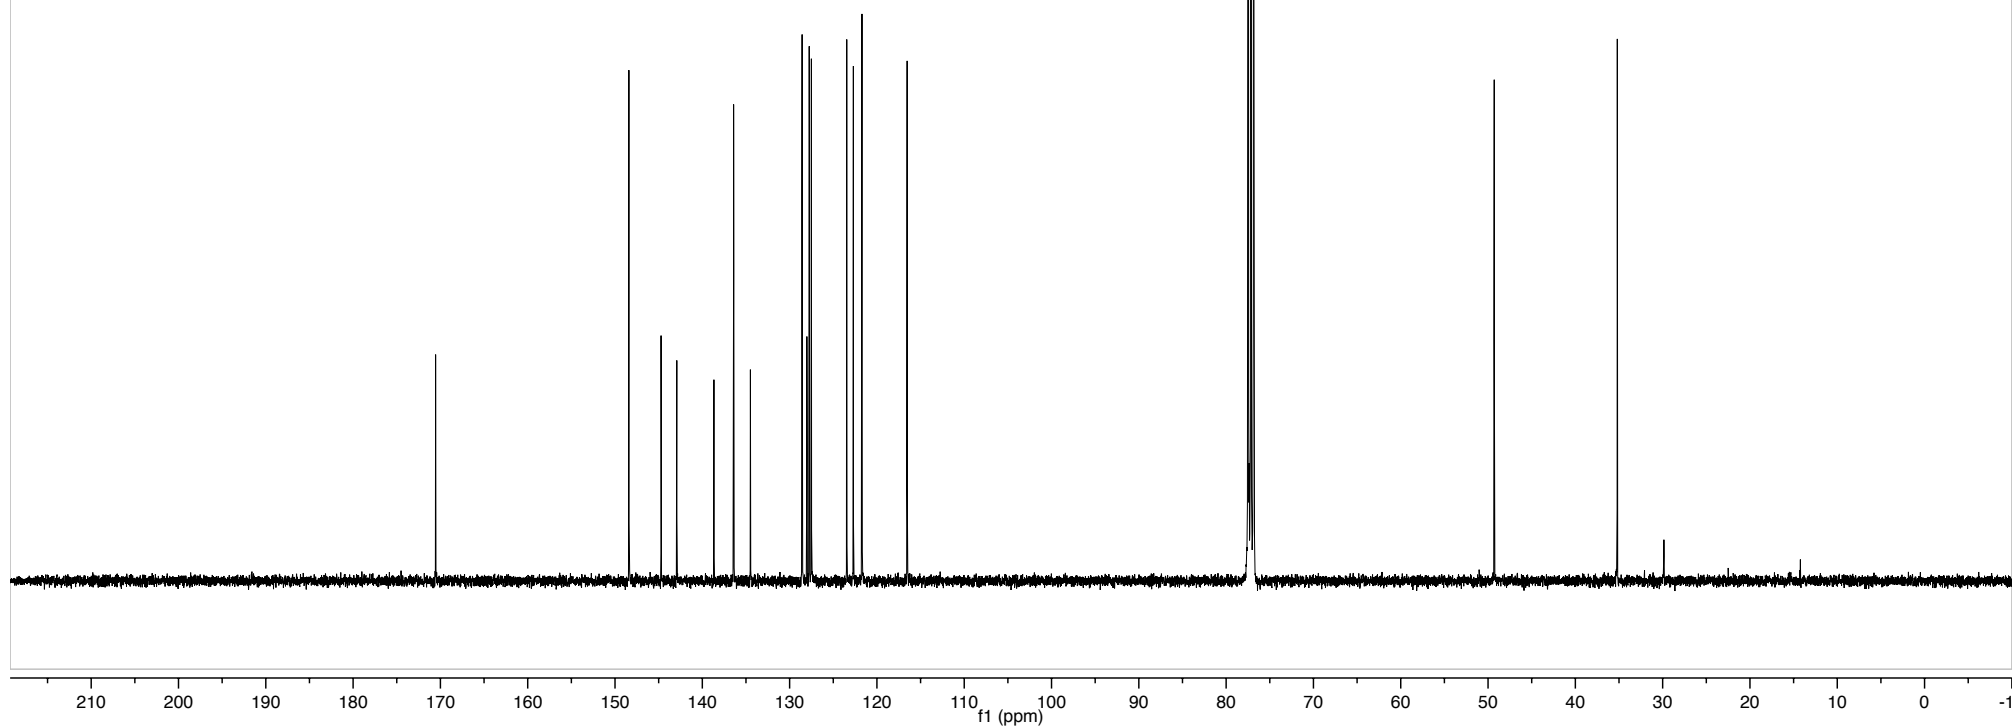

CRL\_01\_074\_3\_H.1.fid

| Parameter              | Value                                                      |
|------------------------|------------------------------------------------------------|
| Data File Name         | / Volumes/ nmrdata-1/ clacker/ nmr/ CRL_01_074_3_H/ 1/ fid |
| Title                  | CRL_01_074_3_H.1.fid                                       |
| Origin                 | Bruker BioSpin GmbH                                        |
| Solvent                | CDCl3                                                      |
| Temperature            | 295.0                                                      |
| Pulse Sequence         | zg30                                                       |
| Number of Scans        | 1                                                          |
| Receiver Gain          | 197                                                        |
| Relaxation Delay       | 1.0000                                                     |
| Pulse Width            | 11.7000                                                    |
| Acquisition Time       | 4.0894                                                     |
| Acquisition Date       | 2017-04-19T22:10:20                                        |
| Spectrometer Frequency | 400.13                                                     |
| Spectral Width         | 8012.8                                                     |
| Lowest Frequency       | -1555.6                                                    |
| Nucleus                | 1H                                                         |
| Acquired Size          | 32768                                                      |
| Spectral Size          | 65536                                                      |

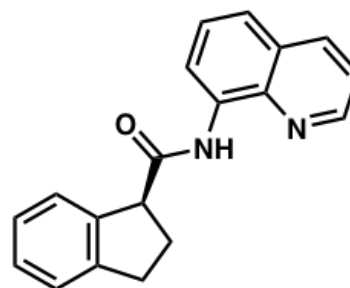

45

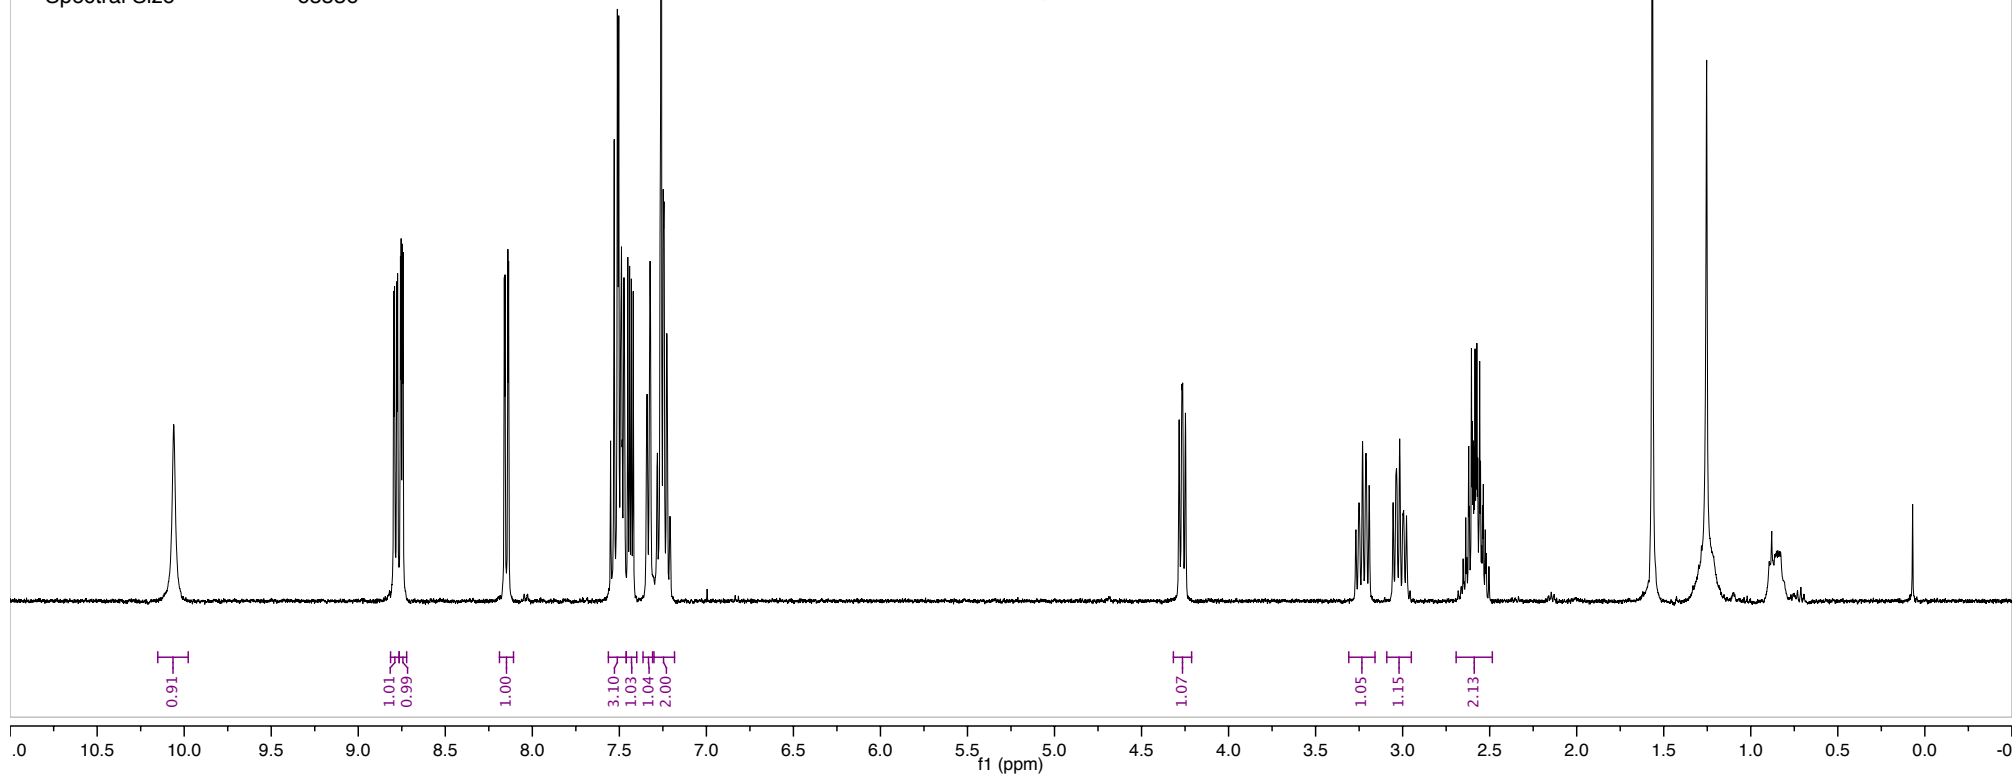



| Parameter              | Value                                                          |
|------------------------|----------------------------------------------------------------|
| Data File Name         | / Volumes/ nmrdata-1/ clacker/ nmr/ CRL_01_074_3_1scan/ 1/ fid |
| Title                  | CRL_01_074_3_1scan.1.fid                                       |
| Origin                 | Bruker BioSpin GmbH                                            |
| Solvent                | CDCl3                                                          |
| Temperature            | 294.9                                                          |
| Pulse Sequence         | zgpg30                                                         |
| Number of Scans        | 1024                                                           |
| Receiver Gain          | 79                                                             |
| Relaxation Delay       | 2.0000                                                         |
| Pulse Width            | 10.0000                                                        |
| Acquisition Time       | 1.3631                                                         |
| Acquisition Date       | 2017-04-19T23:09:28                                            |
| Spectrometer Frequency | 100.62                                                         |
| Spectral Width         | 24038.5                                                        |
| Lowest Frequency       | -1932.1                                                        |
| Nucleus                | <sup>13</sup> C                                                |
| Acquired Size          | 32768                                                          |
| Spectral Size          | 65536                                                          |

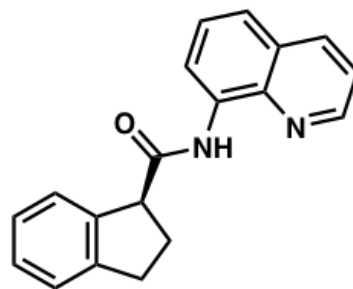

45

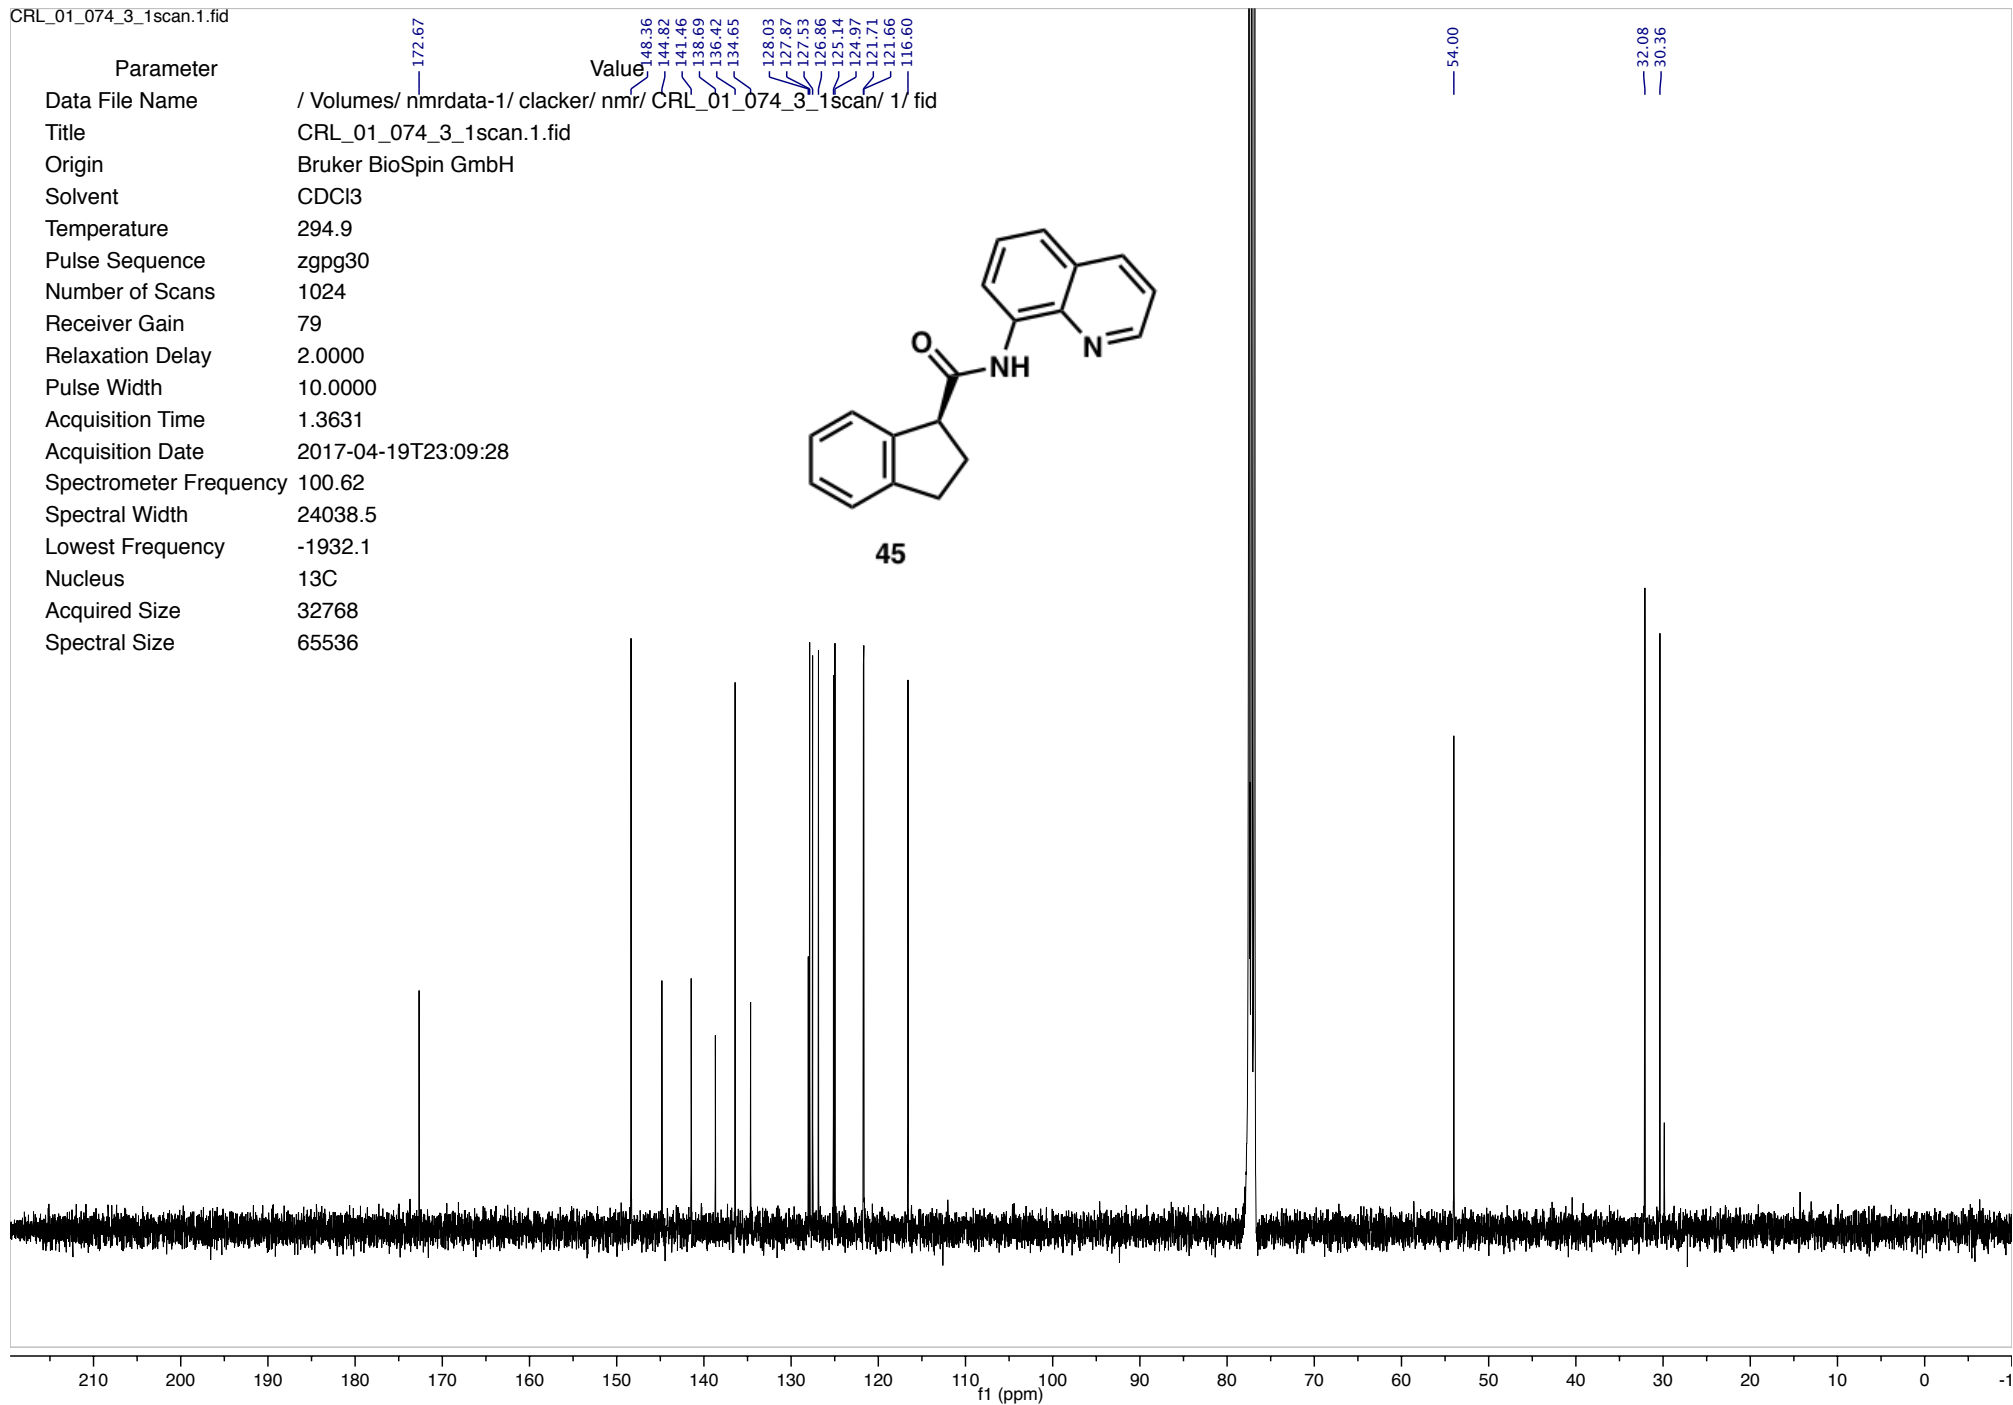

| Parameter              | Value                                                 |
|------------------------|-------------------------------------------------------|
| Data File Name         | / Volumes/ nmrdata/ lchapman/ nmr/ LMC-04-237/ 1/ fid |
| Title                  | LMC-04-237.1.fid                                      |
| Origin                 | Bruker BioSpin GmbH                                   |
| Spectrometer           | spect                                                 |
| Solvent                | CDCl3                                                 |
| Temperature            | 294.9                                                 |
| Pulse Sequence         | zg30                                                  |
| Experiment             | 1D                                                    |
| Number of Scans        | 1                                                     |
| Receiver Gain          | 79                                                    |
| Relaxation Delay       | 1.0000                                                |
| Pulse Width            | 11.7000                                               |
| Acquisition Time       | 4.0894                                                |
| Acquisition Date       | 2016-11-21T17:37:25                                   |
| Spectrometer Frequency | 400.13                                                |
| Spectral Width         | 8012.8                                                |
| Nucleus                | 1H                                                    |
| Acquired Size          | 32768                                                 |
| Spectral Size          | 65536                                                 |

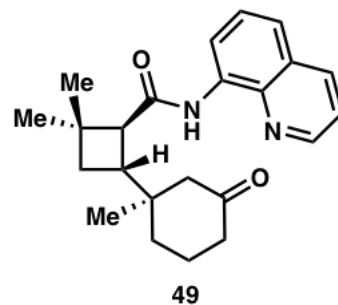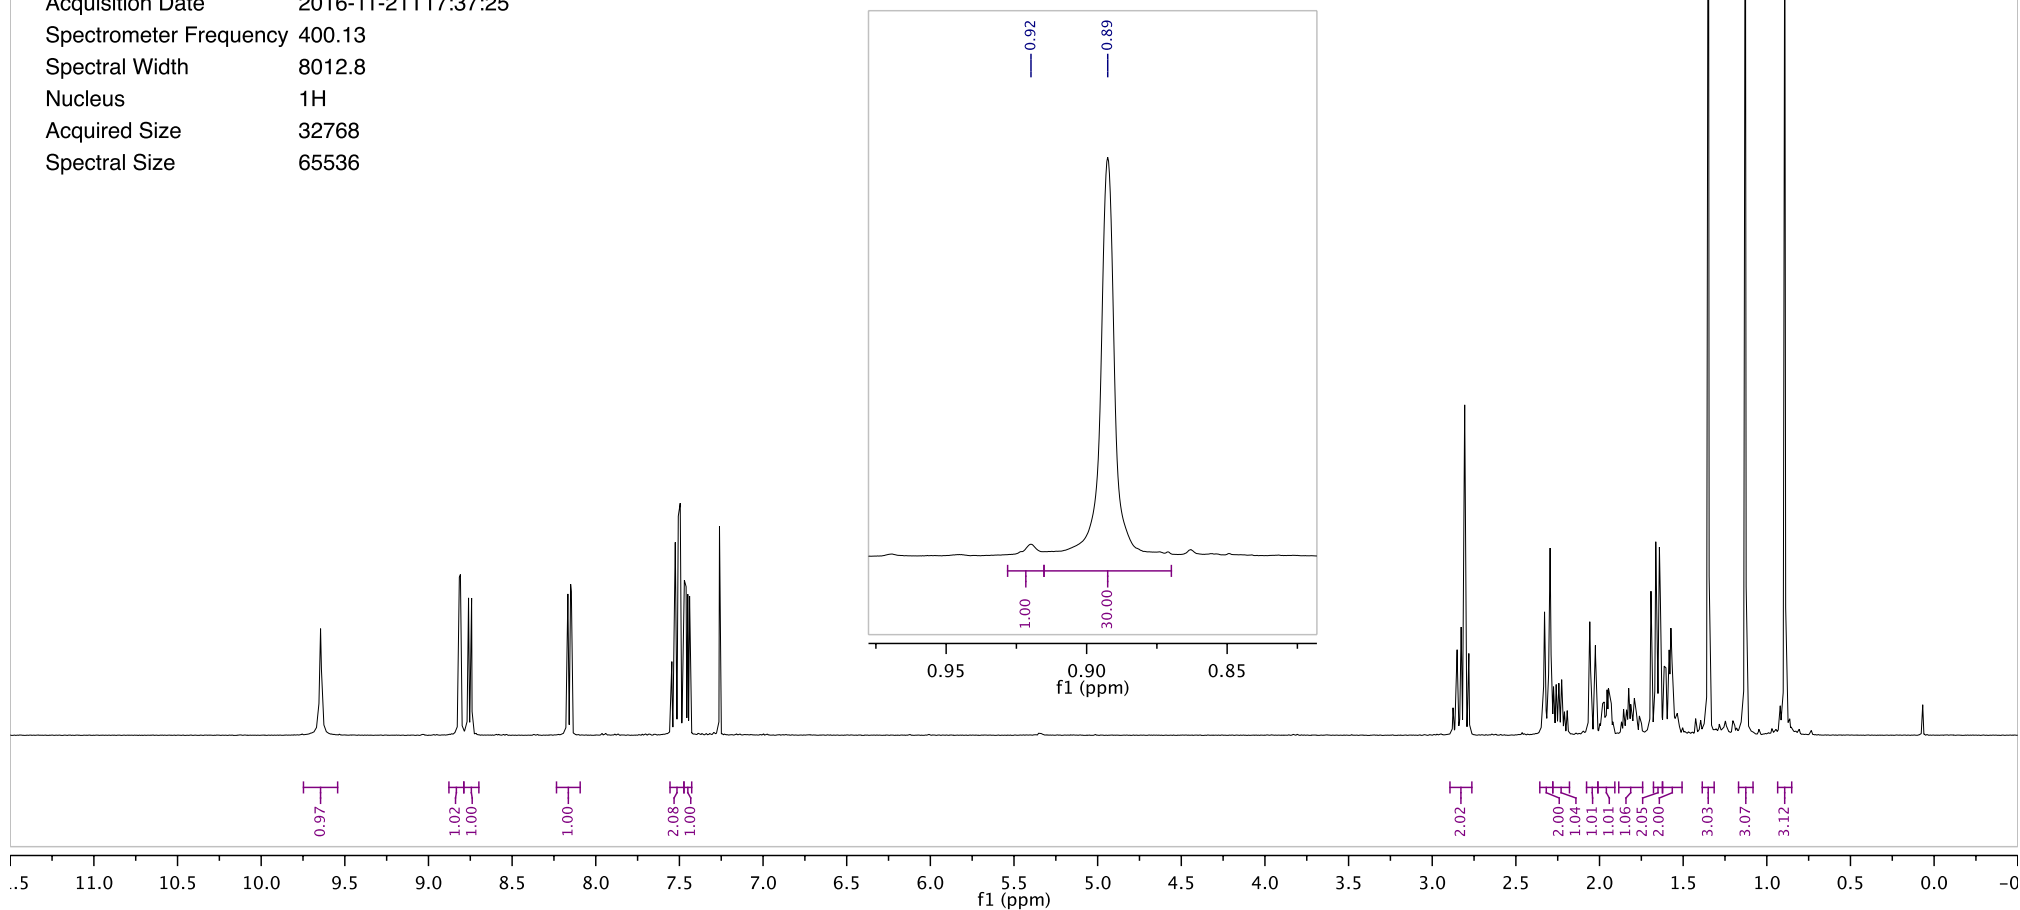

LMC-04-237.3.fid

| Parameter              | Value                                                 |
|------------------------|-------------------------------------------------------|
| Data File Name         | / Volumes/ nmrdata/ lchapman/ nmr/ LMC-04-237/ 3/ fid |
| Title                  | LMC-04-237.3.fid                                      |
| Origin                 | Bruker BioSpin GmbH                                   |
| Spectrometer           | spect                                                 |
| Solvent                | CDCl3                                                 |
| Temperature            | 294.9                                                 |
| Pulse Sequence         | zgpg30                                                |
| Experiment             | 1D                                                    |
| Number of Scans        | 128                                                   |
| Receiver Gain          | 72                                                    |
| Relaxation Delay       | 2.0000                                                |
| Pulse Width            | 10.0000                                               |
| Acquisition Time       | 1.3631                                                |
| Acquisition Date       | 2016-11-21T17:50:45                                   |
| Spectrometer Frequency | 100.62                                                |
| Spectral Width         | 24038.5                                               |
| Nucleus                | 13C                                                   |
| Acquired Size          | 32768                                                 |
| Spectral Size          | 65536                                                 |

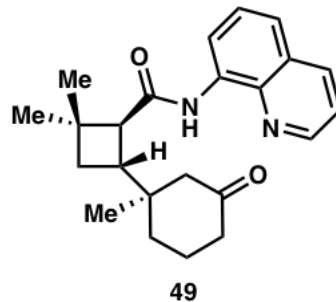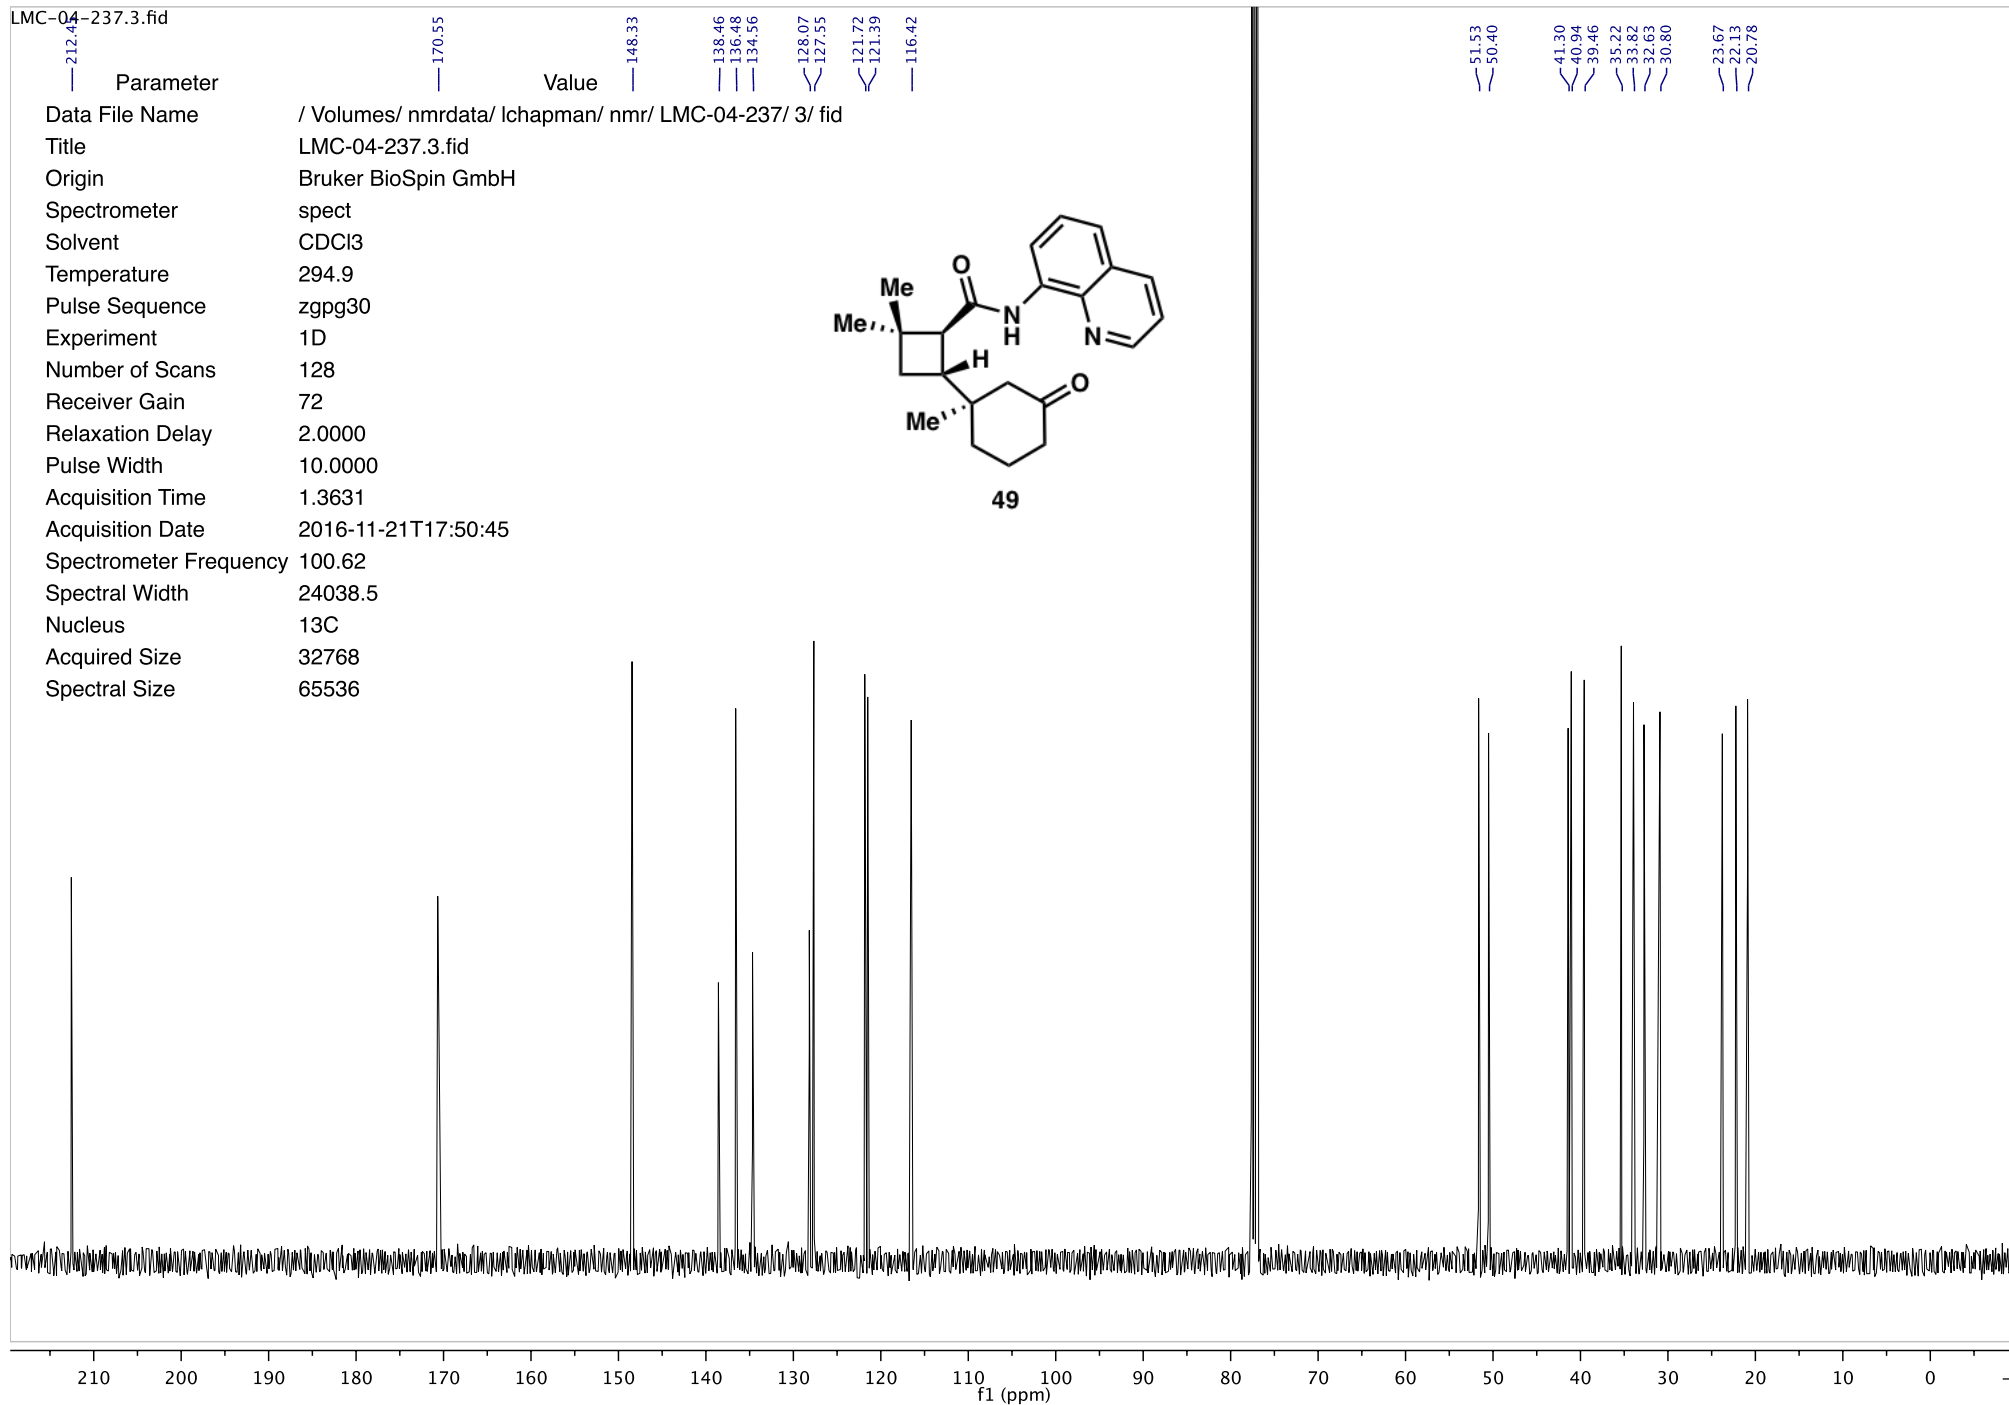

PROTON01  
 LMC-02-08F1  
 Parameter Value  
 Data File Name / Volumes/ data/ indy/ lchapman/ vnmsys/ data/ LMC-02-08F1/ PROTON01.fid/ fid  
 Title PROTON01  
 Comment LMC-02-08F1  
 Origin Varian  
 Spectrometer inova  
 Solvent cdcl3  
 Temperature 25.0  
 Pulse Sequence s2pul  
 Experiment 1D  
 Probe autox7991  
 Number of Scans 64  
 Receiver Gain 40  
 Relaxation Delay 1.0000  
 Pulse Width 0.0000  
 Acquisition Time 3.0000  
 Acquisition Date 2013-10-10T21:10:18  
 Nucleus 1H

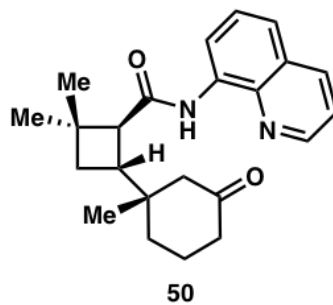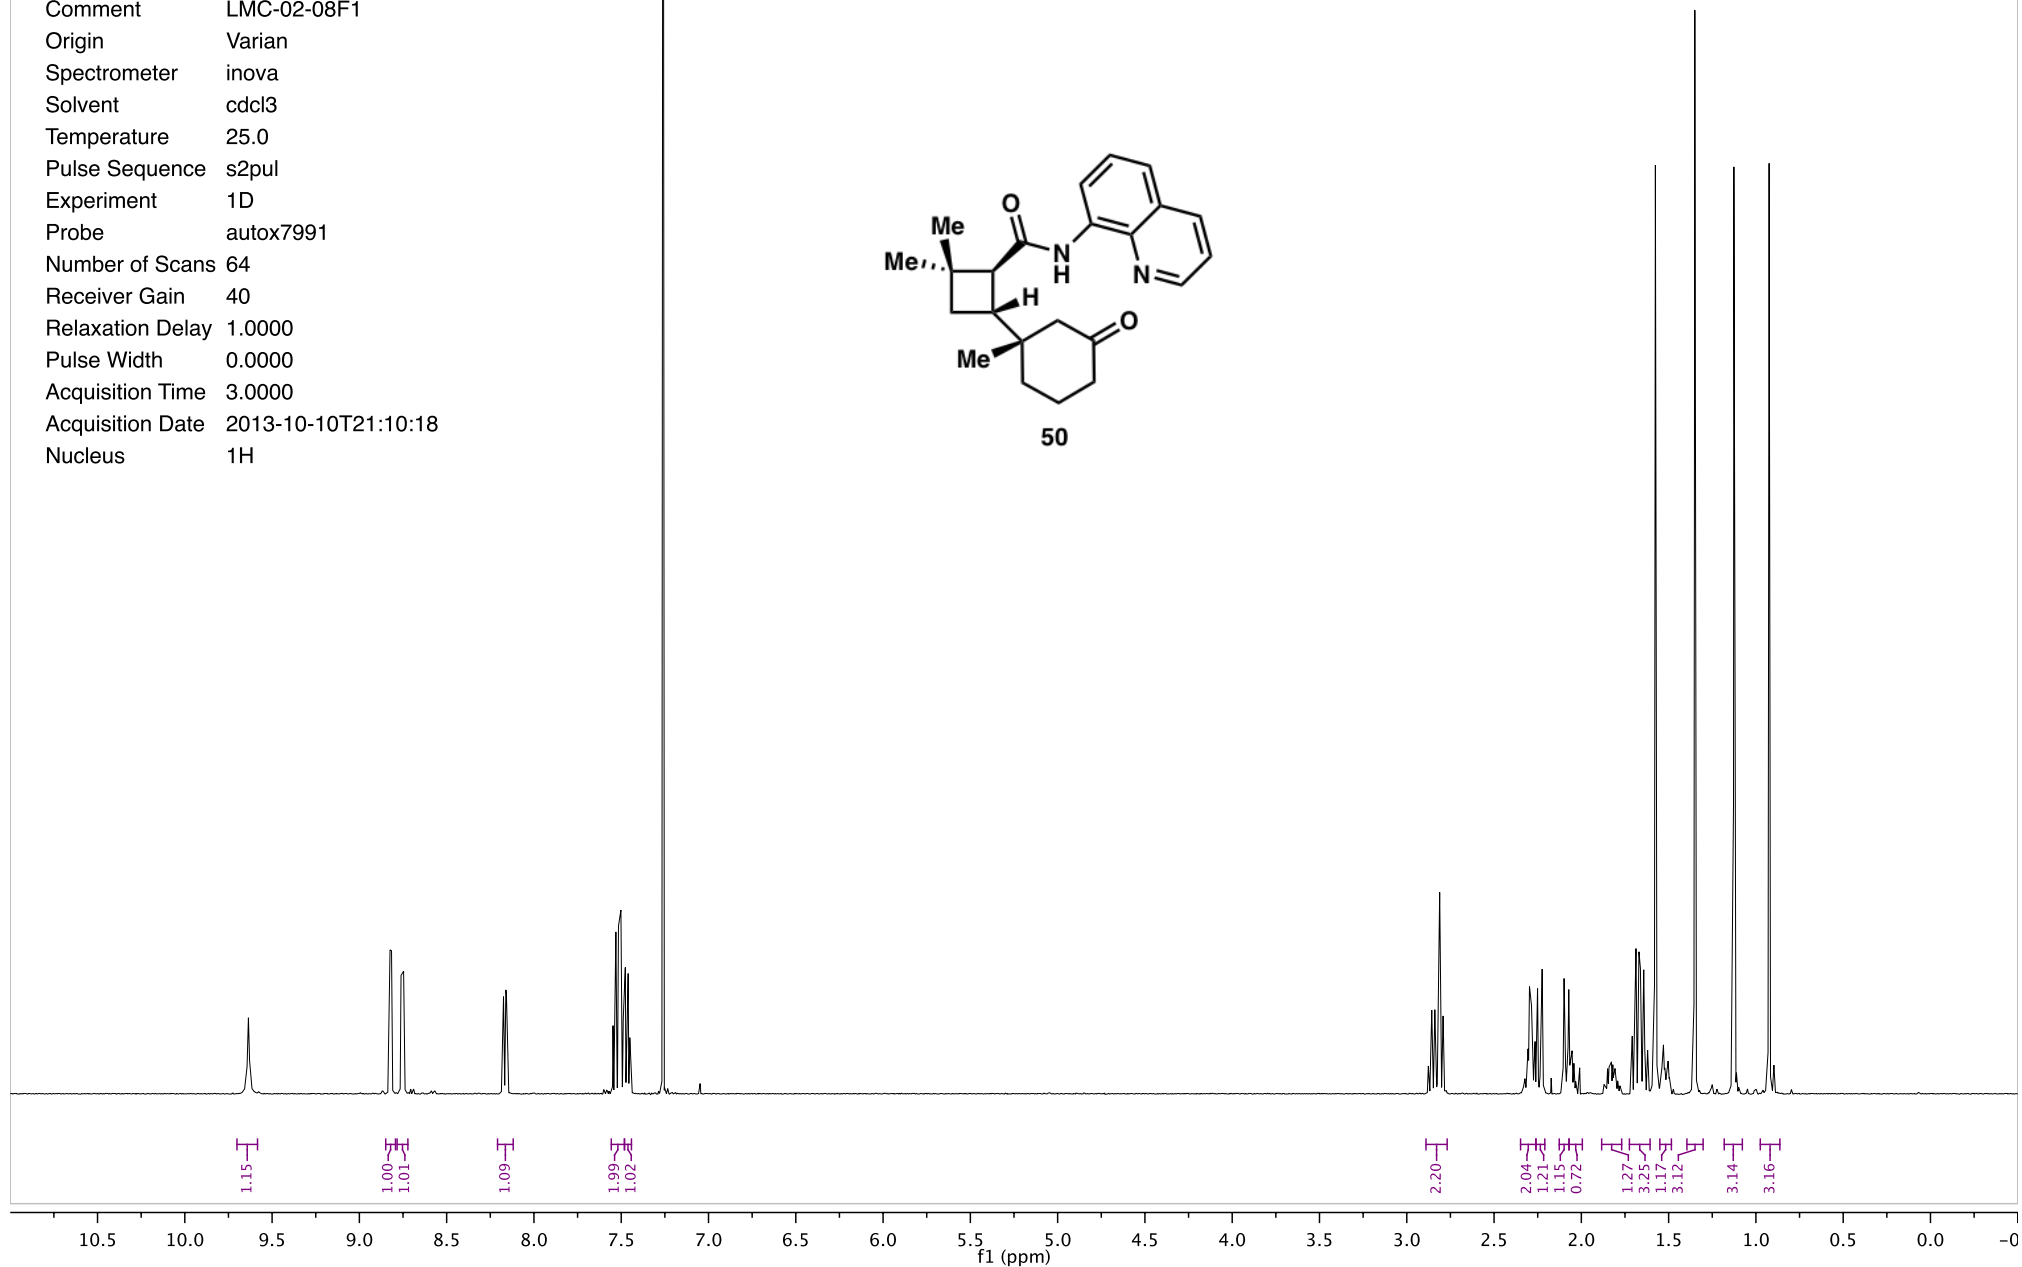

CARBON01

LMC-02-96-2pdt

Parameter

Value

Data File Name / Volumes/ data/ indy/ lchapman/ vnmsys/ data/ LMC-02-96-2pdt/ CARBON01.fid/ fid  
Title CARBON01  
Comment LMC-02-96-2pdt  
Origin Varian  
Spectrometer inova  
Solvent cdcl3  
Temperature 25.0  
Pulse Sequence s2pul  
Experiment 1D  
Probe autox7991  
Number of Scans 1000  
Receiver Gain 30  
Relaxation Delay 1.0000  
Pulse Width 0.0000  
Acquisition Time 1.0420  
Acquisition Date 2014-01-20T19:50:20  
Nucleus 13C

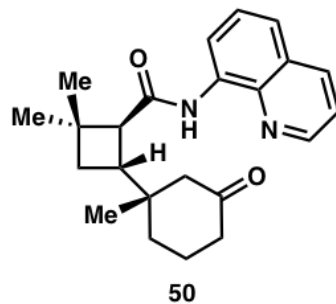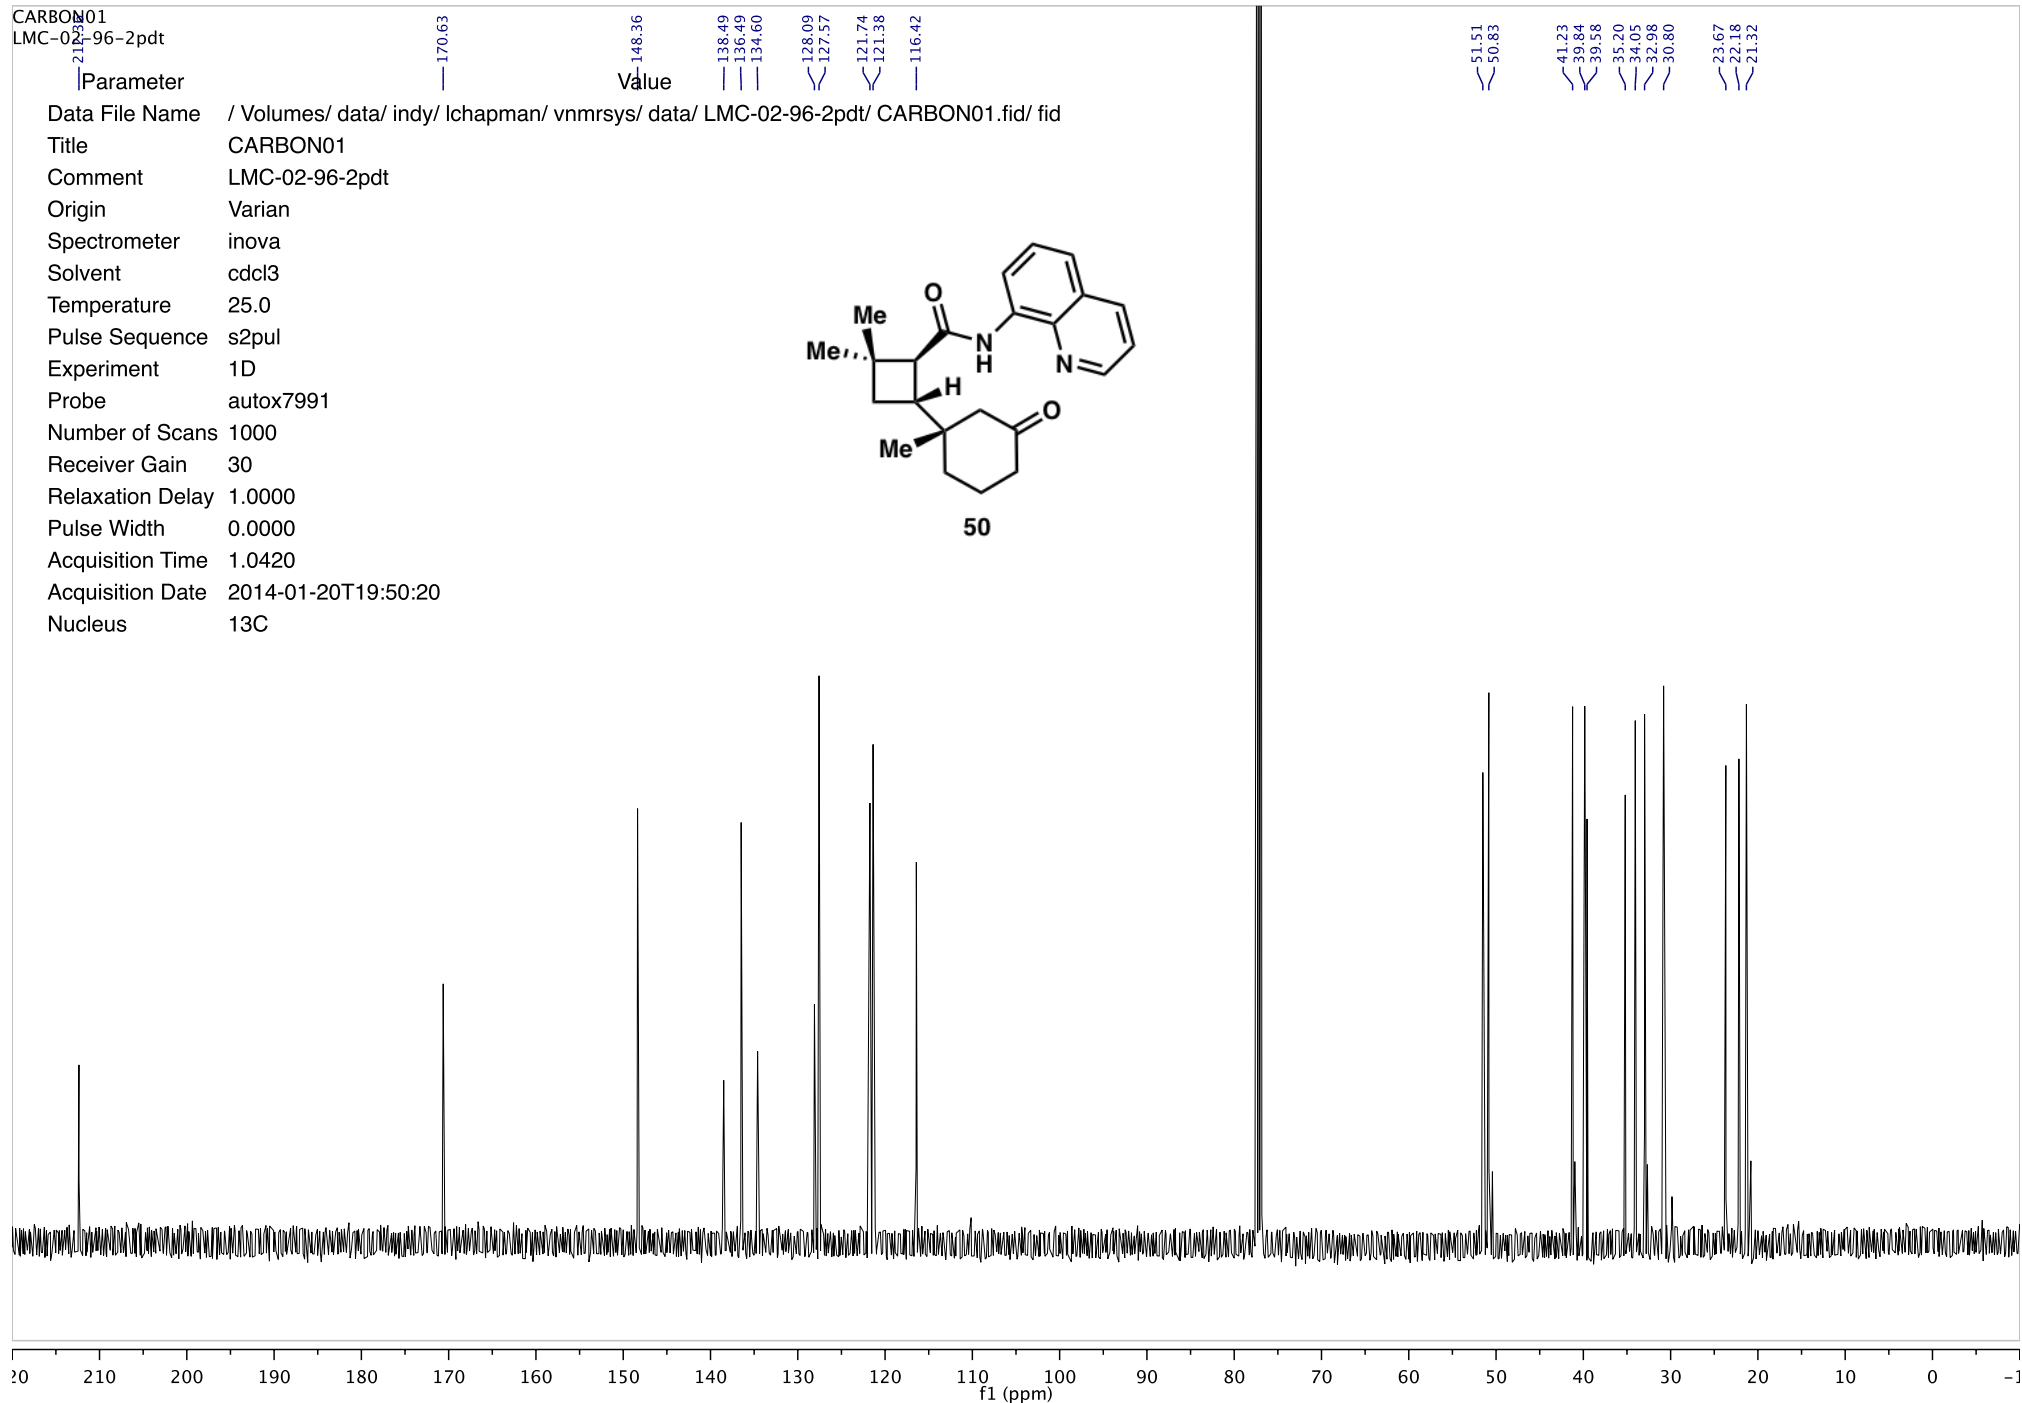

PROTON01

| Parameter        | Value                                                                        |
|------------------|------------------------------------------------------------------------------|
| Data File Name   | / Volumes/ data/ indy/ lchapman/ vnmrsys/ data/ LMC-02-08/ PROTON01.fid/ fid |
| Title            | PROTON01                                                                     |
| Origin           | Varian                                                                       |
| Spectrometer     | inova                                                                        |
| Solvent          | cdcl3                                                                        |
| Temperature      | 25.0                                                                         |
| Pulse Sequence   | s2pul                                                                        |
| Experiment       | 1D                                                                           |
| Probe            | autox7991                                                                    |
| Number of Scans  | 16                                                                           |
| Receiver Gain    | 30                                                                           |
| Relaxation Delay | 1.0000                                                                       |
| Pulse Width      | 0.0000                                                                       |
| Acquisition Time | 3.0000                                                                       |
| Acquisition Date | 2013-09-24T14:44:36                                                          |
| Nucleus          | 1H                                                                           |

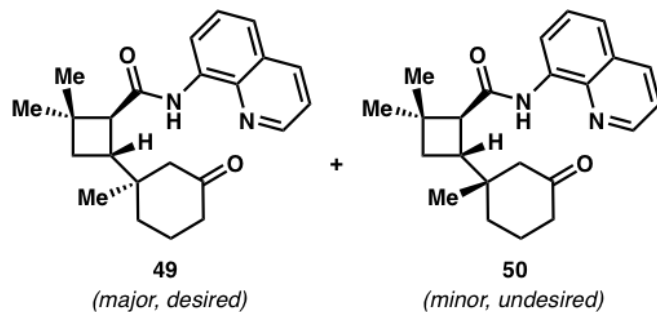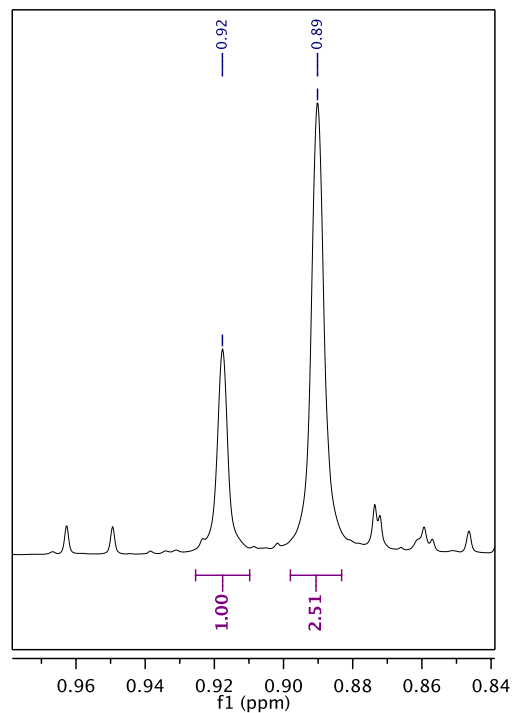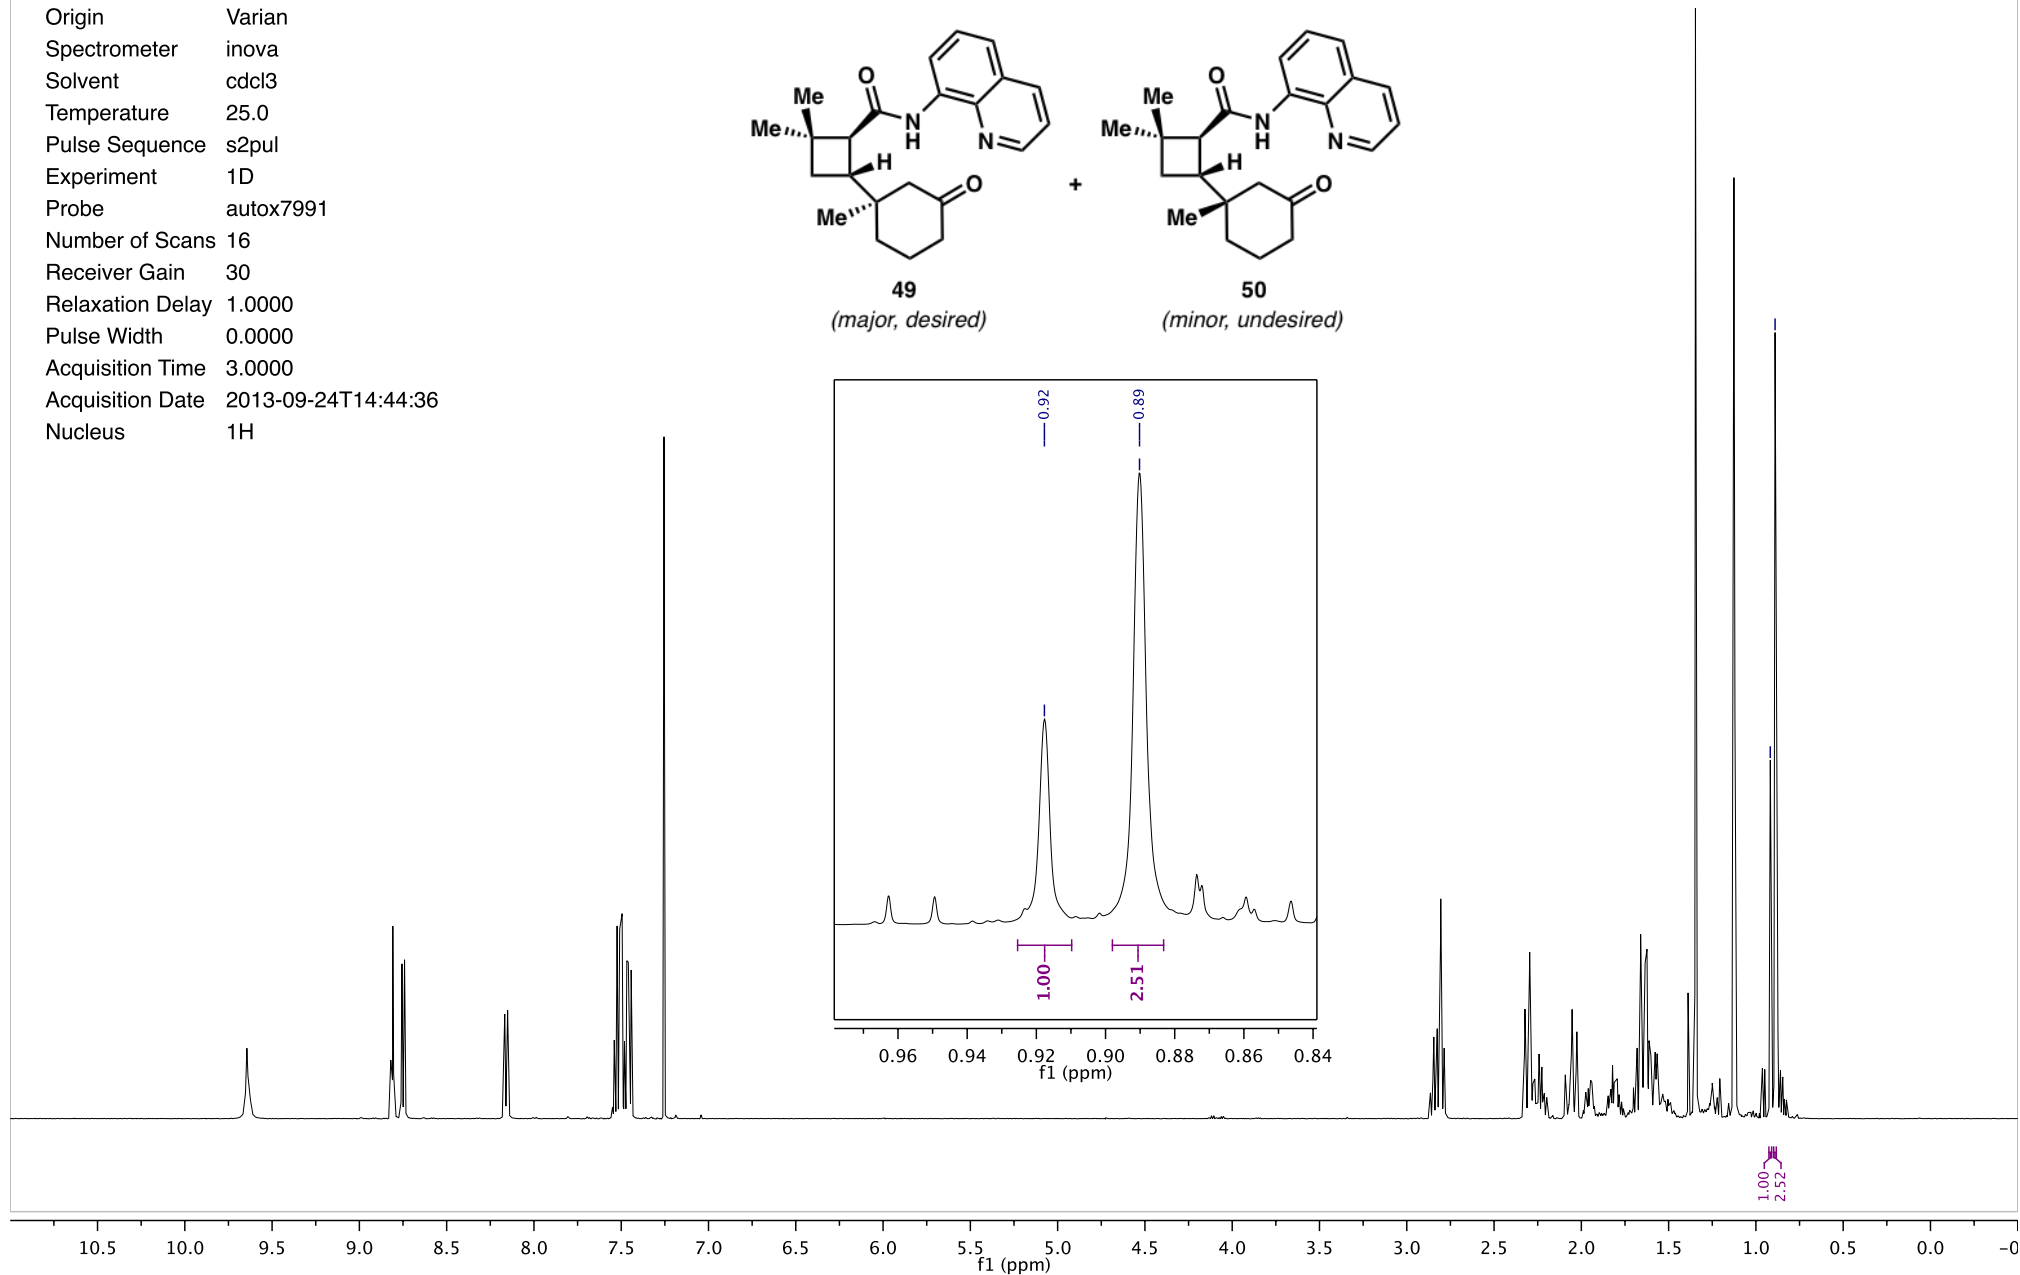

| Parameter              | Value                                                       |
|------------------------|-------------------------------------------------------------|
| Data File Name         | / Volumes/ nmrdata/ lchapman/ nmr/ LMC-04-243-ketal/ 1/ fid |
| Title                  | LMC-04-243-ketal.1.fid                                      |
| Comment                |                                                             |
| Origin                 | Bruker BioSpin GmbH                                         |
| Spectrometer           | spect                                                       |
| Solvent                | CDCl3                                                       |
| Temperature            | 294.9                                                       |
| Pulse Sequence         | zg30                                                        |
| Experiment             | 1D                                                          |
| Number of Scans        | 1                                                           |
| Receiver Gain          | 30                                                          |
| Relaxation Delay       | 1.0000                                                      |
| Pulse Width            | 11.7000                                                     |
| Acquisition Time       | 4.0894                                                      |
| Acquisition Date       | 2016-11-30T19:51:41                                         |
| Spectrometer Frequency | 400.13                                                      |
| Spectral Width         | 8012.8                                                      |
| Nucleus                | 1H                                                          |
| Acquired Size          | 32768                                                       |
| Spectral Size          | 65536                                                       |

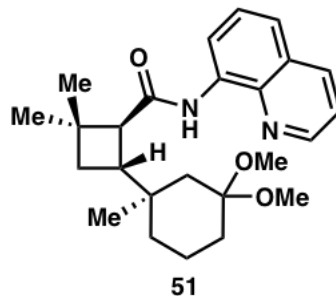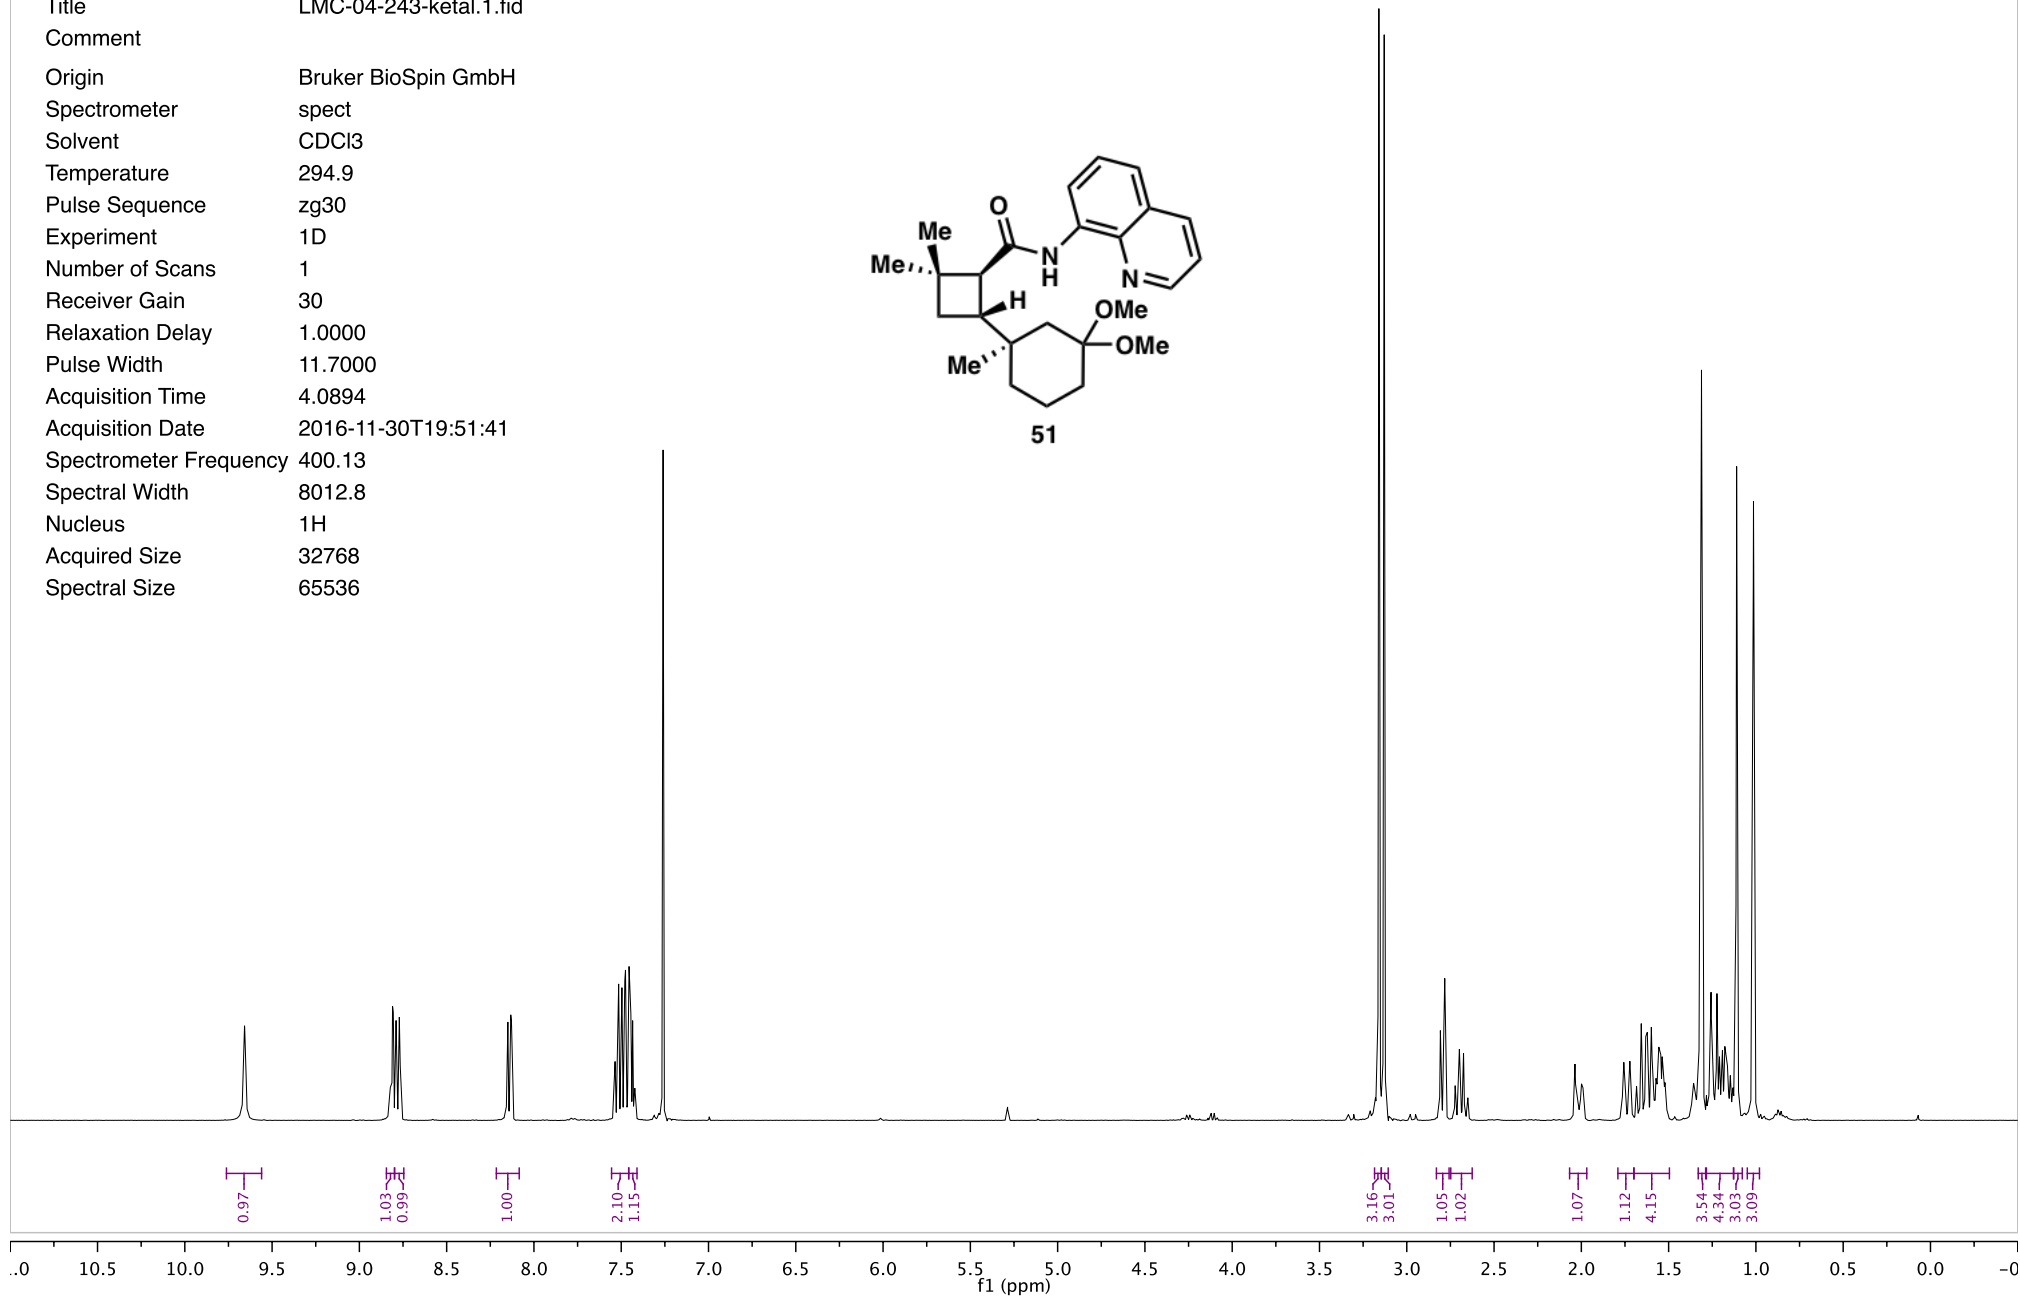

LMC-04-243-ketal.2.fid

| Parameter              | Value                                                       |
|------------------------|-------------------------------------------------------------|
| Data File Name         | / Volumes/ nmrdata/ lchapman/ nmr/ LMC-04-243-ketal/ 2/ fid |
| Title                  | LMC-04-243-ketal.2.fid                                      |
| Origin                 | Bruker BioSpin GmbH                                         |
| Spectrometer           | spect                                                       |
| Solvent                | CDCl3                                                       |
| Temperature            | 295.0                                                       |
| Pulse Sequence         | zgpg30                                                      |
| Experiment             | 1D                                                          |
| Number of Scans        | 128                                                         |
| Receiver Gain          | 88                                                          |
| Relaxation Delay       | 2.0000                                                      |
| Pulse Width            | 10.0000                                                     |
| Acquisition Time       | 1.3631                                                      |
| Acquisition Date       | 2016-11-30T19:59:38                                         |
| Spectrometer Frequency | 100.62                                                      |
| Spectral Width         | 24038.5                                                     |
| Nucleus                | 13C                                                         |
| Acquired Size          | 32768                                                       |
| Spectral Size          | 65536                                                       |

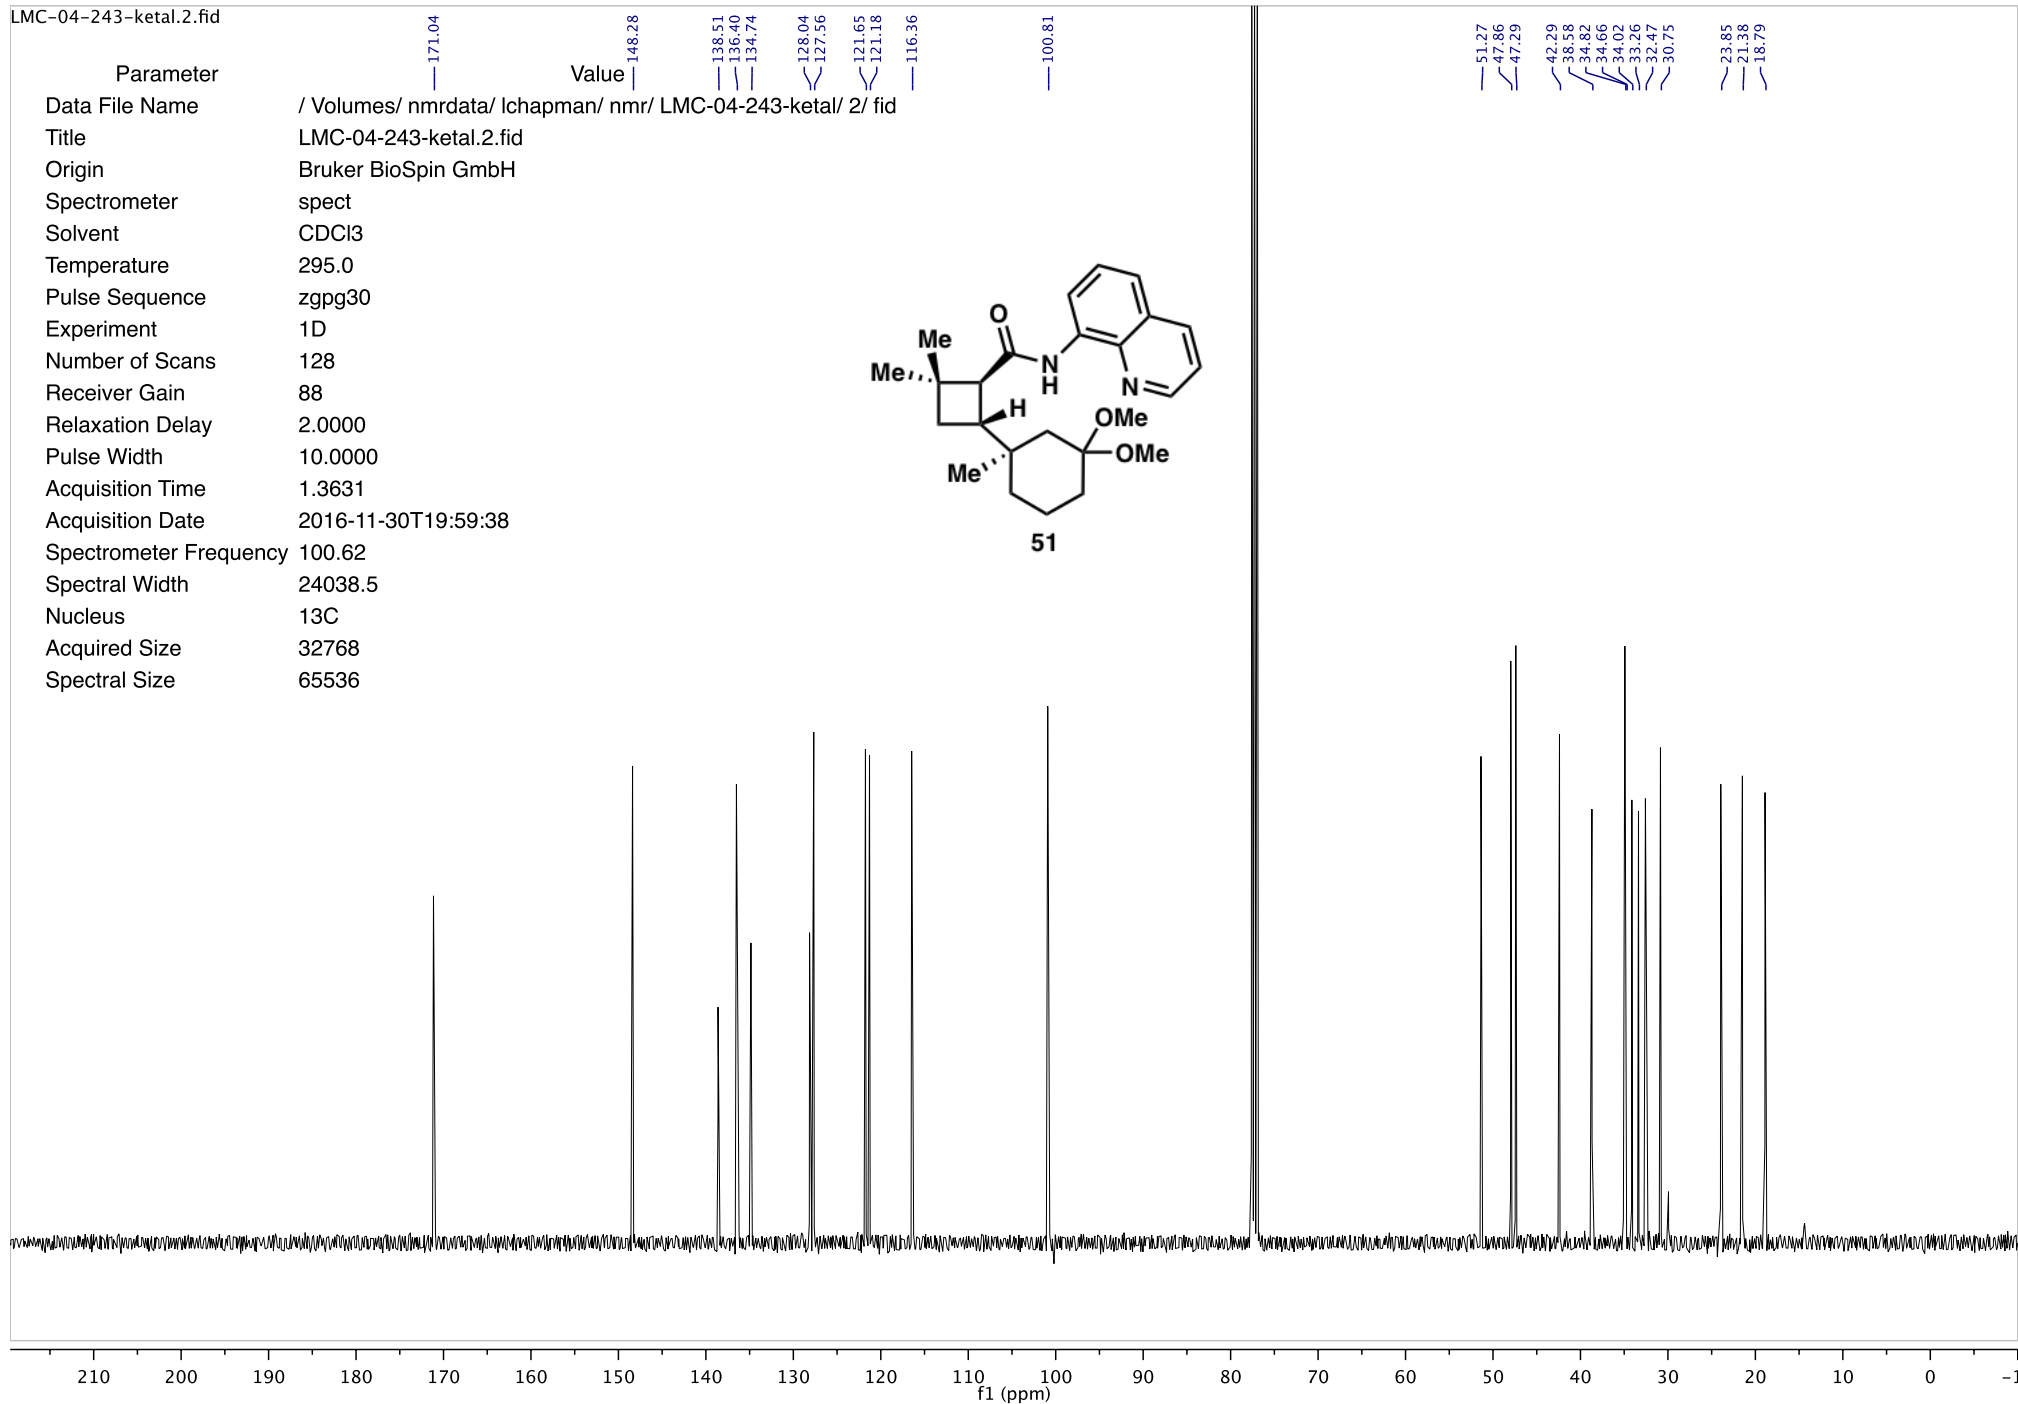



| Parameter              | Value                                                          |
|------------------------|----------------------------------------------------------------|
| Data File Name         | / Volumes/ nmrdata/ lchapman/ nmr/ LMC-04-275-OMe-Enol/ 1/ fid |
| Title                  | LMC-04-275-OMe-Enol.1.fid                                      |
| Comment                |                                                                |
| Origin                 | Bruker BioSpin GmbH                                            |
| Spectrometer           | spect                                                          |
| Solvent                | CDCl3                                                          |
| Temperature            | 295.0                                                          |
| Pulse Sequence         | zg30                                                           |
| Experiment             | 1D                                                             |
| Number of Scans        | 1                                                              |
| Receiver Gain          | 99                                                             |
| Relaxation Delay       | 1.0000                                                         |
| Pulse Width            | 11.7000                                                        |
| Acquisition Time       | 4.0894                                                         |
| Acquisition Date       | 2017-04-10T21:29:29                                            |
| Spectrometer Frequency | 400.13                                                         |
| Spectral Width         | 8012.8                                                         |
| Nucleus                | 1H                                                             |
| Acquired Size          | 32768                                                          |
| Spectral Size          | 65536                                                          |

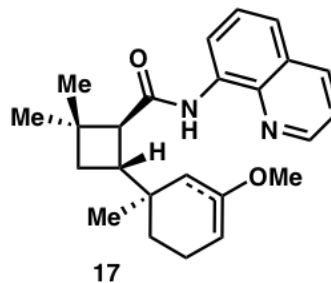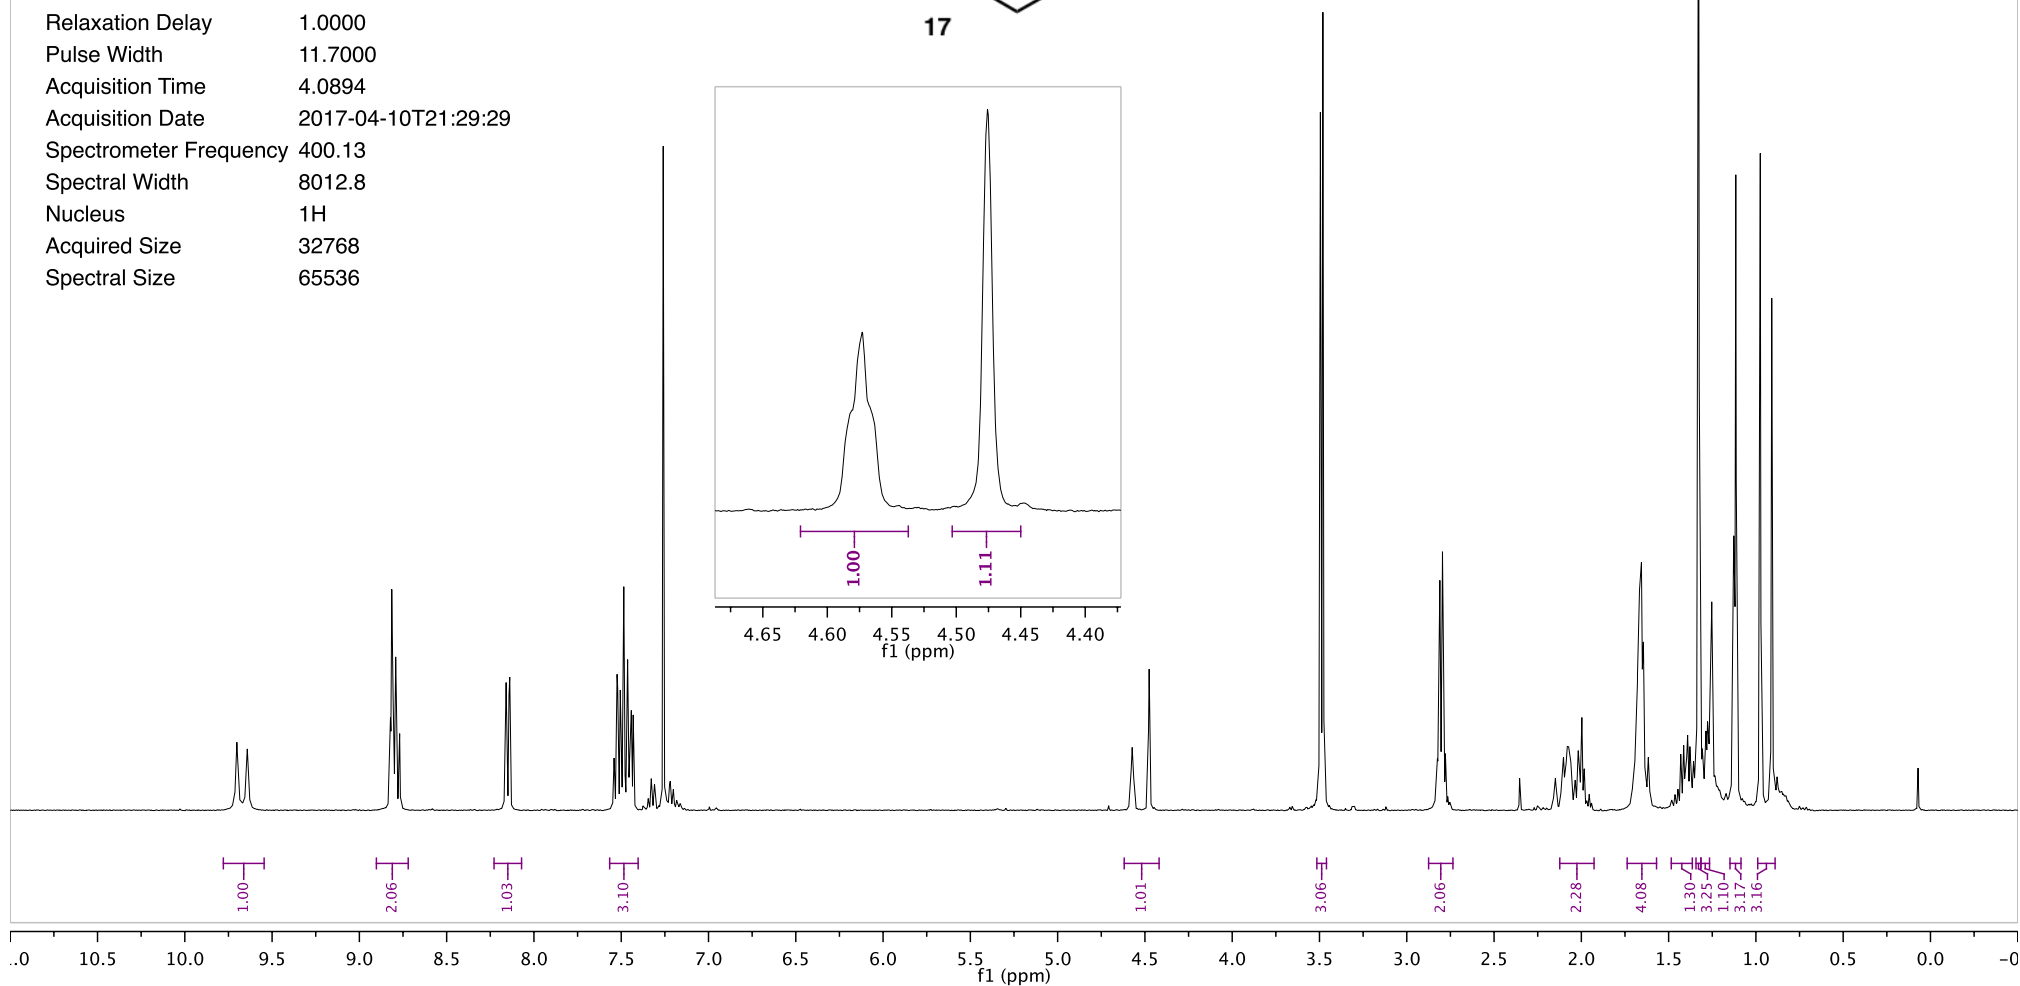

| Parameter              | Value                                                          |
|------------------------|----------------------------------------------------------------|
| Data File Name         | / Volumes/ nmrdata/ lchapman/ nmr/ LMC-04-275-OMe-Enol/ 2/ fid |
| Title                  | LMC-04-275-OMe-Enol.2.fid                                      |
| Origin                 | Bruker BioSpin GmbH                                            |
| Spectrometer           | spect                                                          |
| Solvent                | CDCl3                                                          |
| Temperature            | 294.9                                                          |
| Pulse Sequence         | zgpg30                                                         |
| Experiment             | 1D                                                             |
| Number of Scans        | 256                                                            |
| Receiver Gain          | 79                                                             |
| Relaxation Delay       | 2.0000                                                         |
| Pulse Width            | 10.0000                                                        |
| Acquisition Time       | 1.3631                                                         |
| Acquisition Date       | 2017-04-10T21:44:44                                            |
| Spectrometer Frequency | 100.62                                                         |
| Spectral Width         | 24038.5                                                        |
| Nucleus                | 13C                                                            |
| Acquired Size          | 32768                                                          |
| Spectral Size          | 65536                                                          |

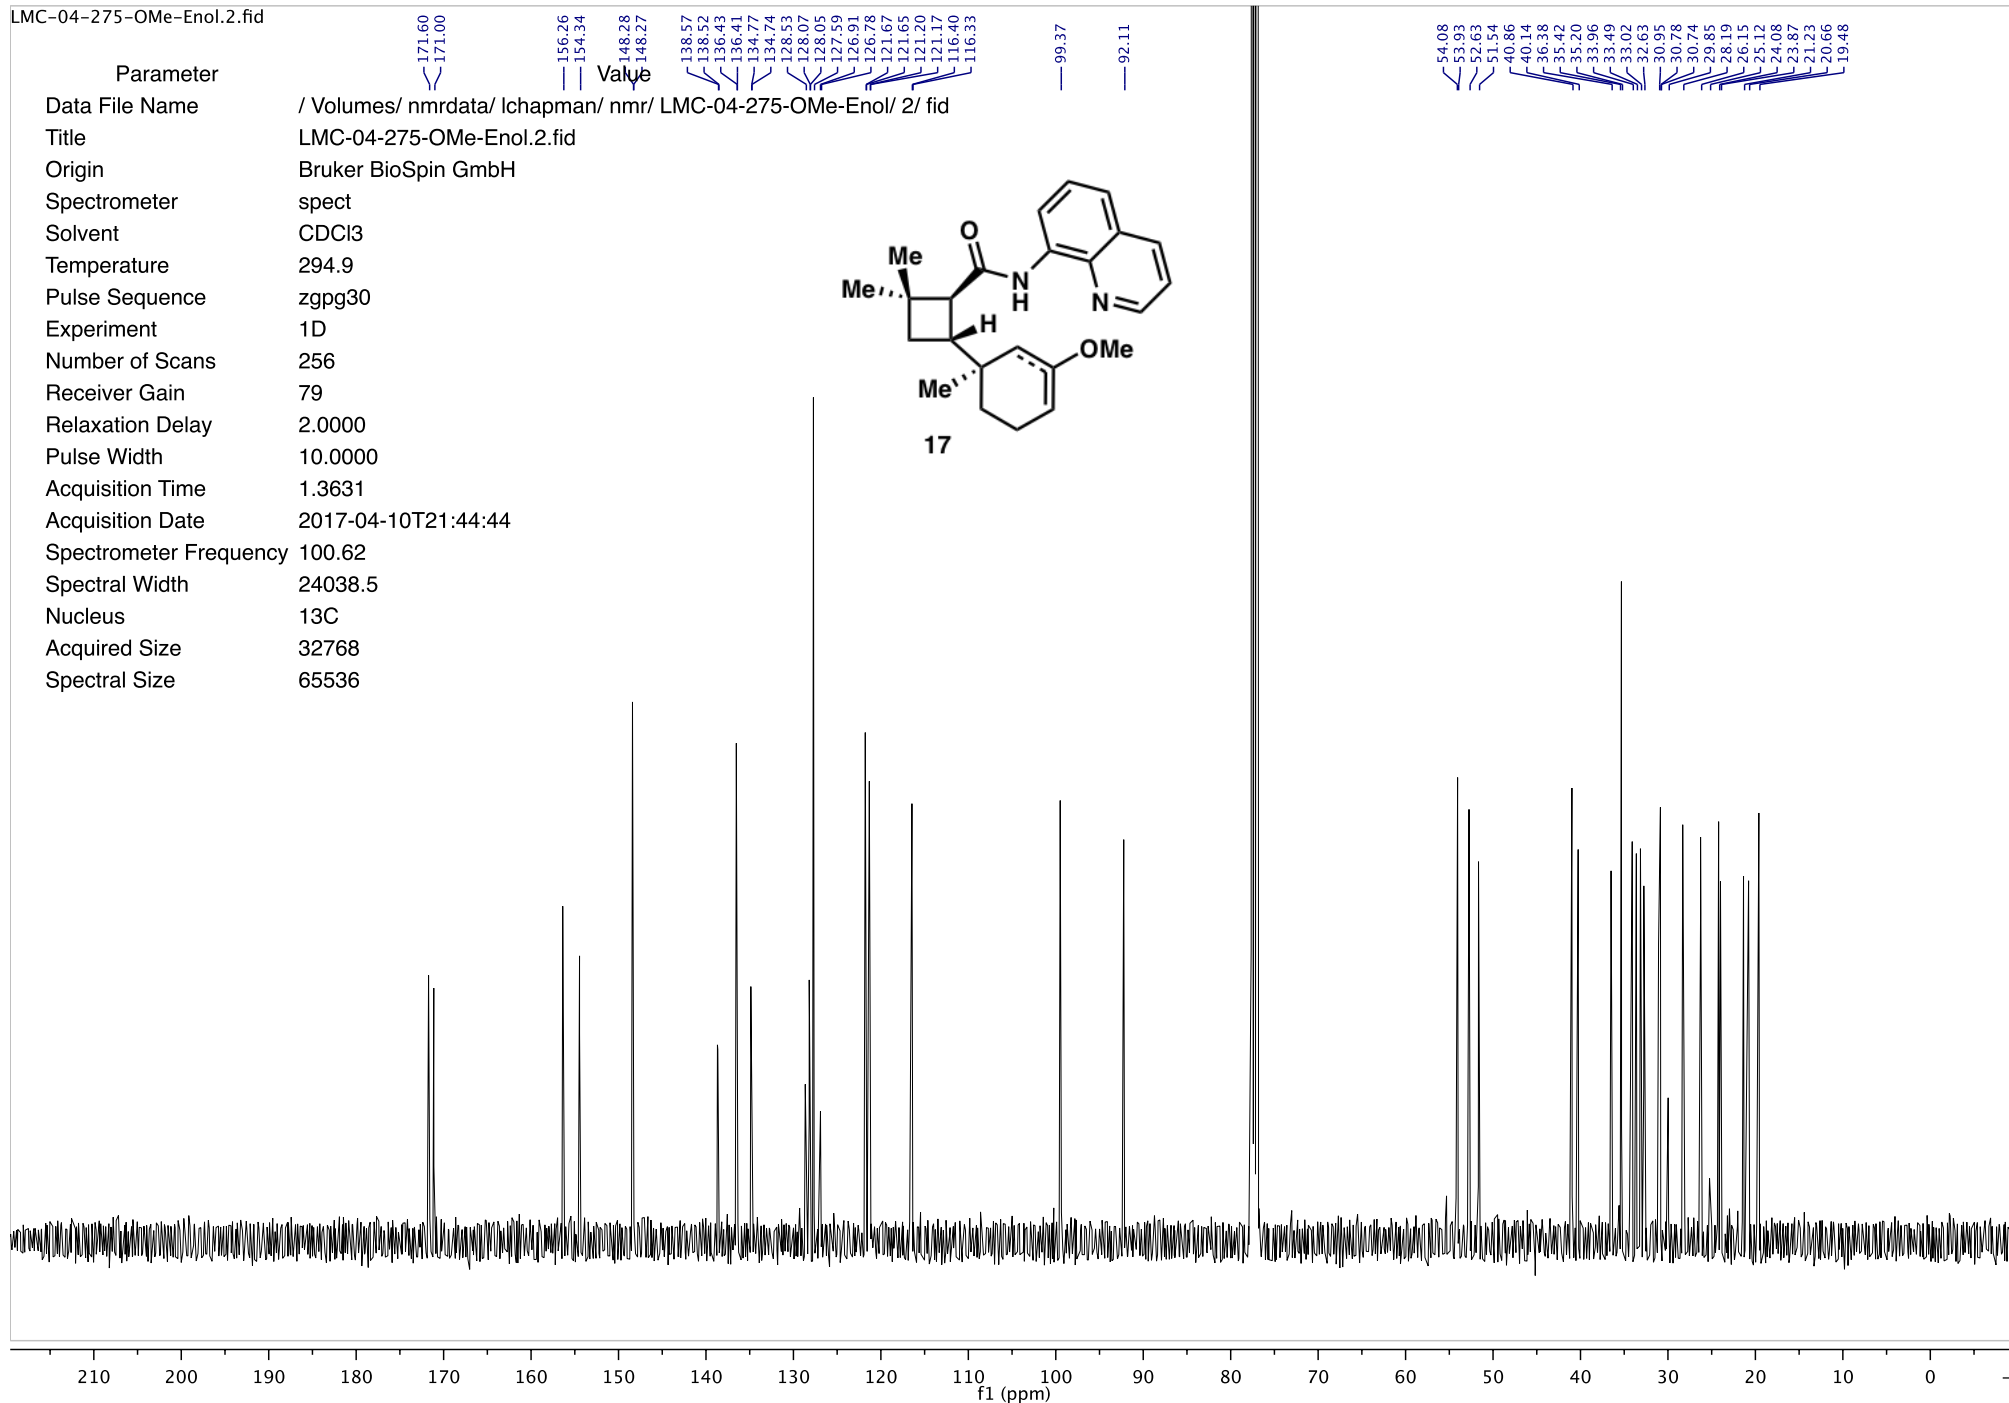

| Parameter              | Value                                                      |
|------------------------|------------------------------------------------------------|
| Data File Name         | / Volumes/ nmrdata/ lchapman/ nmr/ LMC-03-96-flash/ 3/ fid |
| Title                  | LMC-03-96-flash.3.fid                                      |
| Comment                |                                                            |
| Origin                 | Bruker BioSpin GmbH                                        |
| Spectrometer           | spect                                                      |
| Solvent                | CDCl3                                                      |
| Temperature            | 293.2                                                      |
| Pulse Sequence         | zg30                                                       |
| Experiment             | 1D                                                         |
| Number of Scans        | 16                                                         |
| Receiver Gain          | 30                                                         |
| Relaxation Delay       | 1.0000                                                     |
| Pulse Width            | 11.7000                                                    |
| Acquisition Time       | 4.0894                                                     |
| Acquisition Date       | 2016-12-08T14:30:07                                        |
| Spectrometer Frequency | 400.13                                                     |
| Spectral Width         | 8012.8                                                     |
| Nucleus                | 1H                                                         |
| Acquired Size          | 32768                                                      |
| Spectral Size          | 65536                                                      |

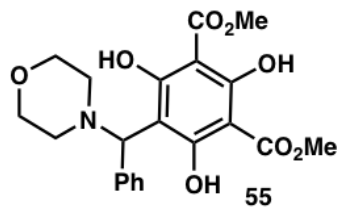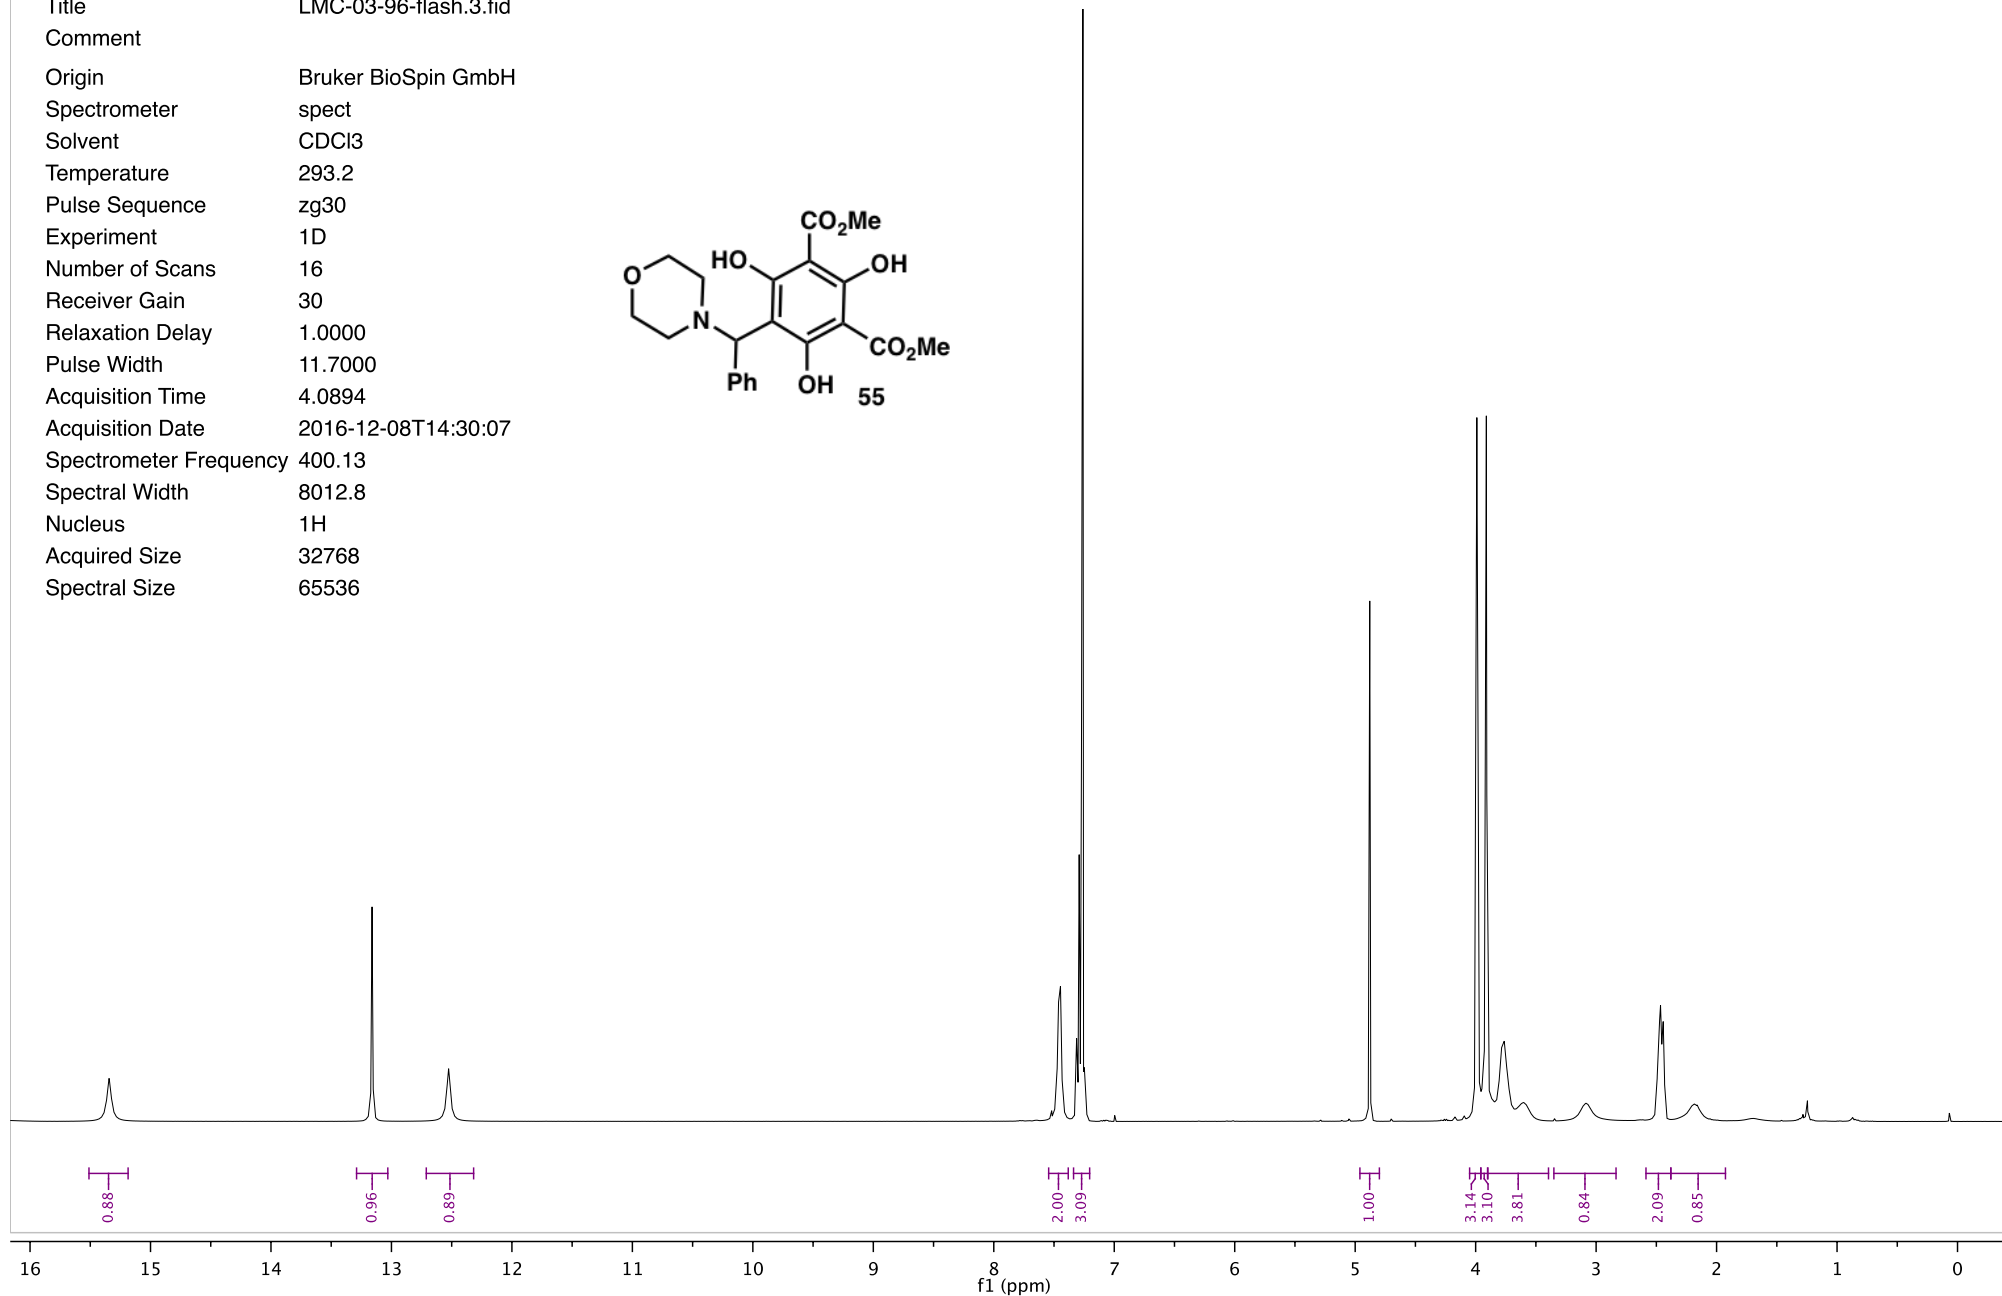

| Parameter              | Value                                                      |
|------------------------|------------------------------------------------------------|
| Data File Name         | / Volumes/ nmrdata/ lchapman/ nmr/ LMC-03-96-flash/ 2/ fid |
| Title                  | LMC-03-96-flash.2.fid                                      |
| Origin                 | Bruker BioSpin GmbH                                        |
| Spectrometer           | spect                                                      |
| Solvent                | CDCl3                                                      |
| Temperature            | 293.1                                                      |
| Pulse Sequence         | zgpg30                                                     |
| Experiment             | 1D                                                         |
| Number of Scans        | 128                                                        |
| Receiver Gain          | 64                                                         |
| Relaxation Delay       | 2.0000                                                     |
| Pulse Width            | 10.0000                                                    |
| Acquisition Time       | 1.3631                                                     |
| Acquisition Date       | 2016-12-08T14:28:20                                        |
| Spectrometer Frequency | 100.62                                                     |
| Spectral Width         | 24038.5                                                    |
| Nucleus                | 13C                                                        |
| Acquired Size          | 32768                                                      |
| Spectral Size          | 65536                                                      |

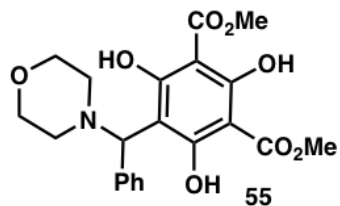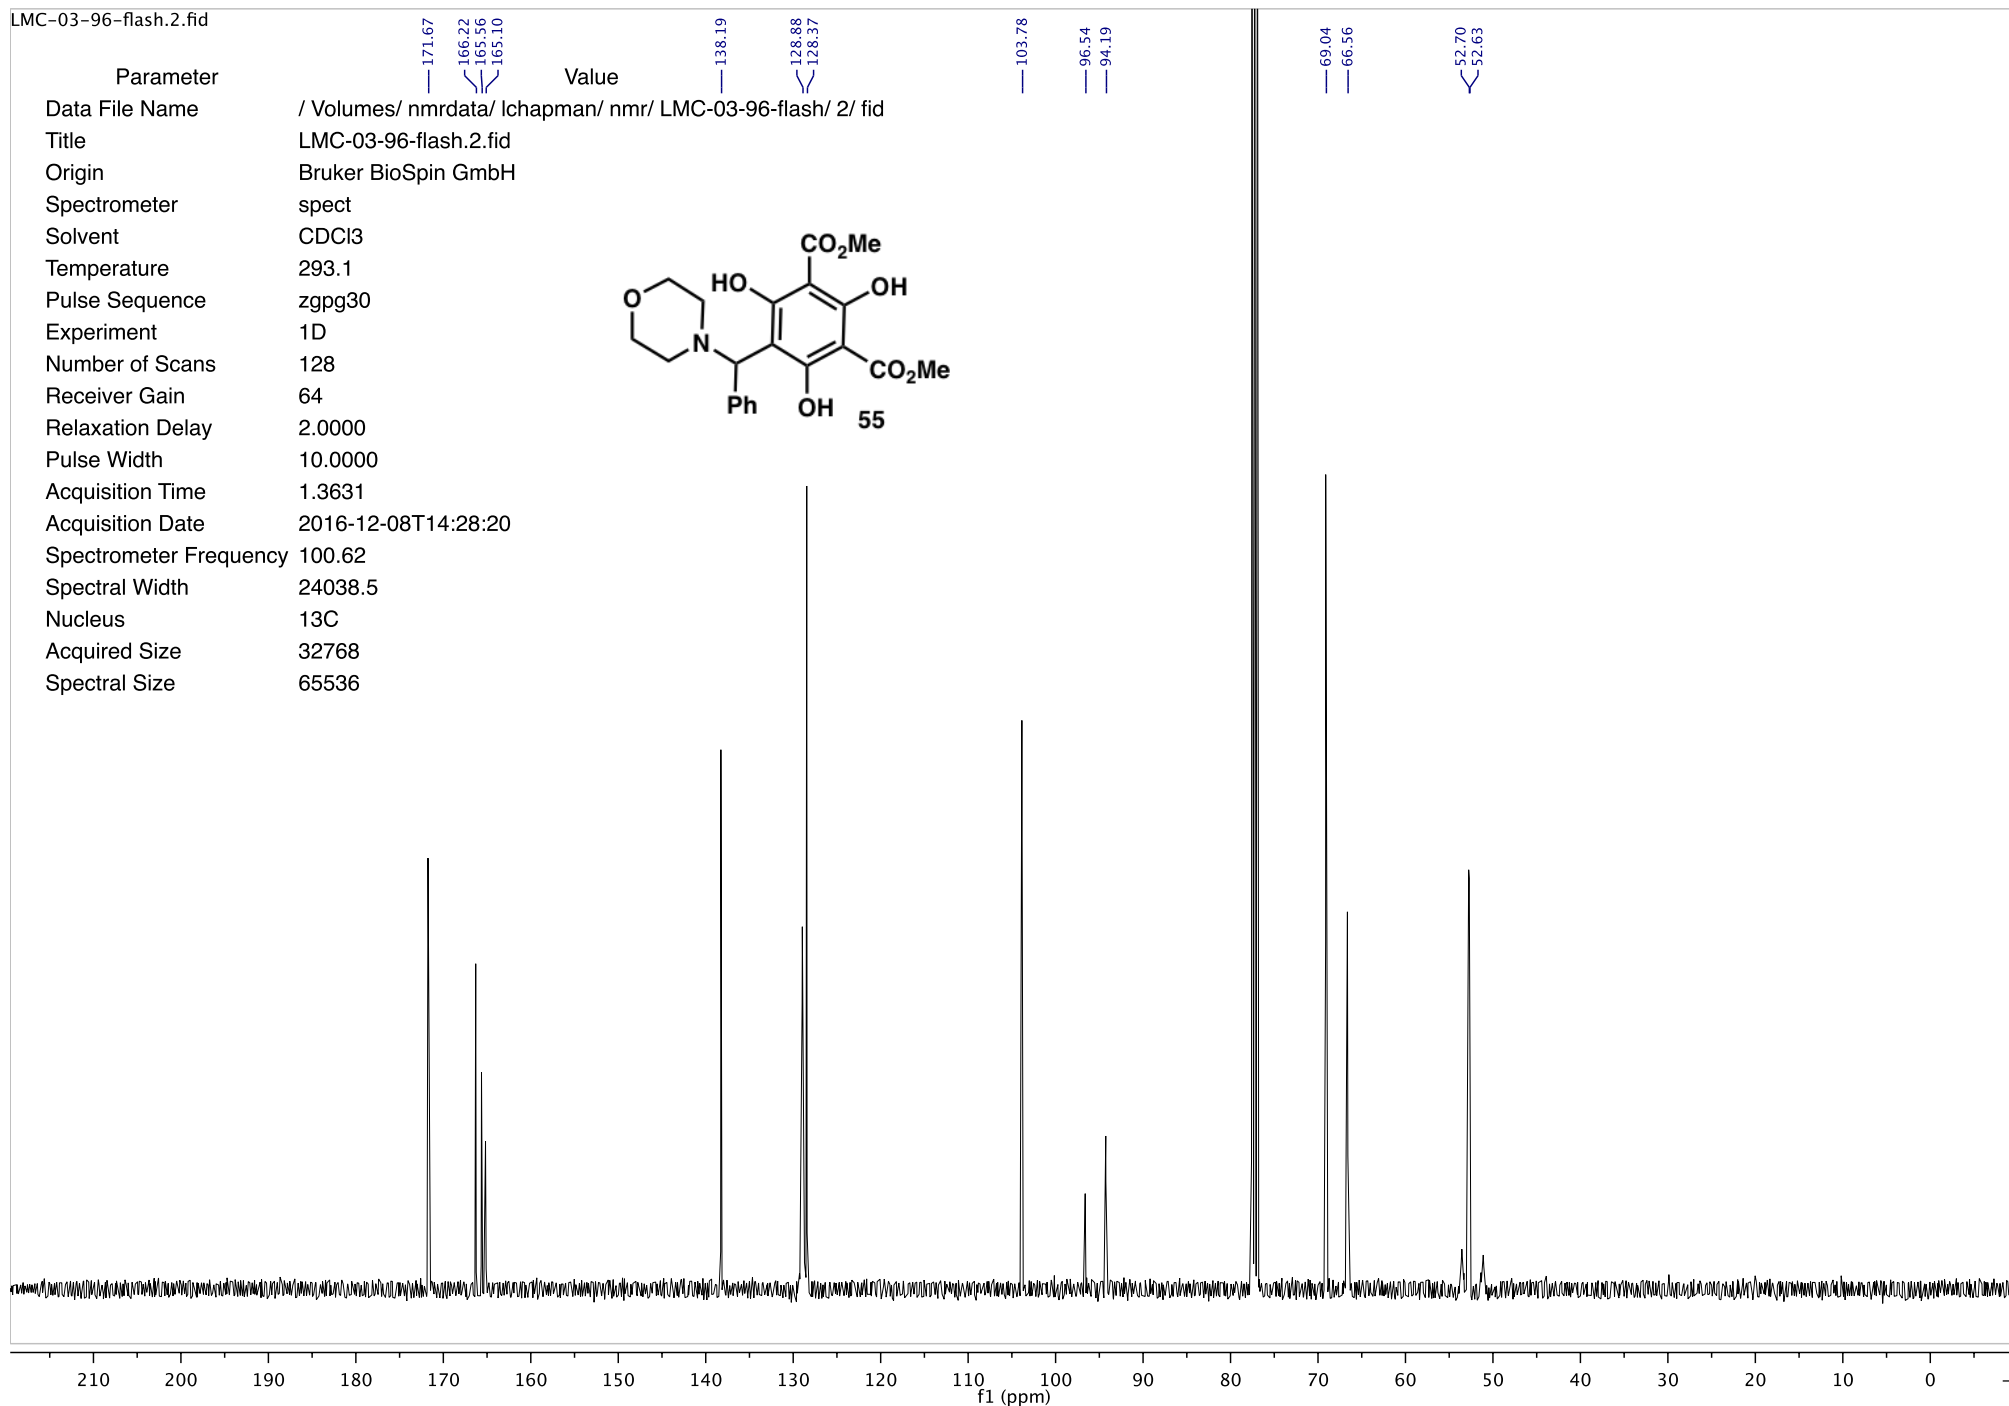

| Parameter              | Value                                                        |
|------------------------|--------------------------------------------------------------|
| Data File Name         | / Volumes/ nmrdata/ lchapman/ nmr/ LMC-04-250-carbon/ 1/ fid |
| Title                  | LMC-04-250-carbon.1.fid                                      |
| Comment                |                                                              |
| Origin                 | Bruker BioSpin GmbH                                          |
| Spectrometer           | spect                                                        |
| Solvent                | CDCl3                                                        |
| Temperature            | 293.1                                                        |
| Pulse Sequence         | zg30                                                         |
| Experiment             | 1D                                                           |
| Number of Scans        | 1                                                            |
| Receiver Gain          | 177                                                          |
| Relaxation Delay       | 1.0000                                                       |
| Pulse Width            | 11.7000                                                      |
| Acquisition Time       | 4.0894                                                       |
| Acquisition Date       | 2016-12-09T10:20:26                                          |
| Spectrometer Frequency | 400.13                                                       |
| Spectral Width         | 8012.8                                                       |
| Nucleus                | 1H                                                           |
| Acquired Size          | 32768                                                        |
| Spectral Size          | 65536                                                        |

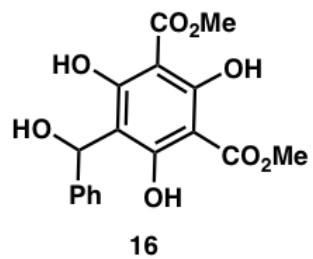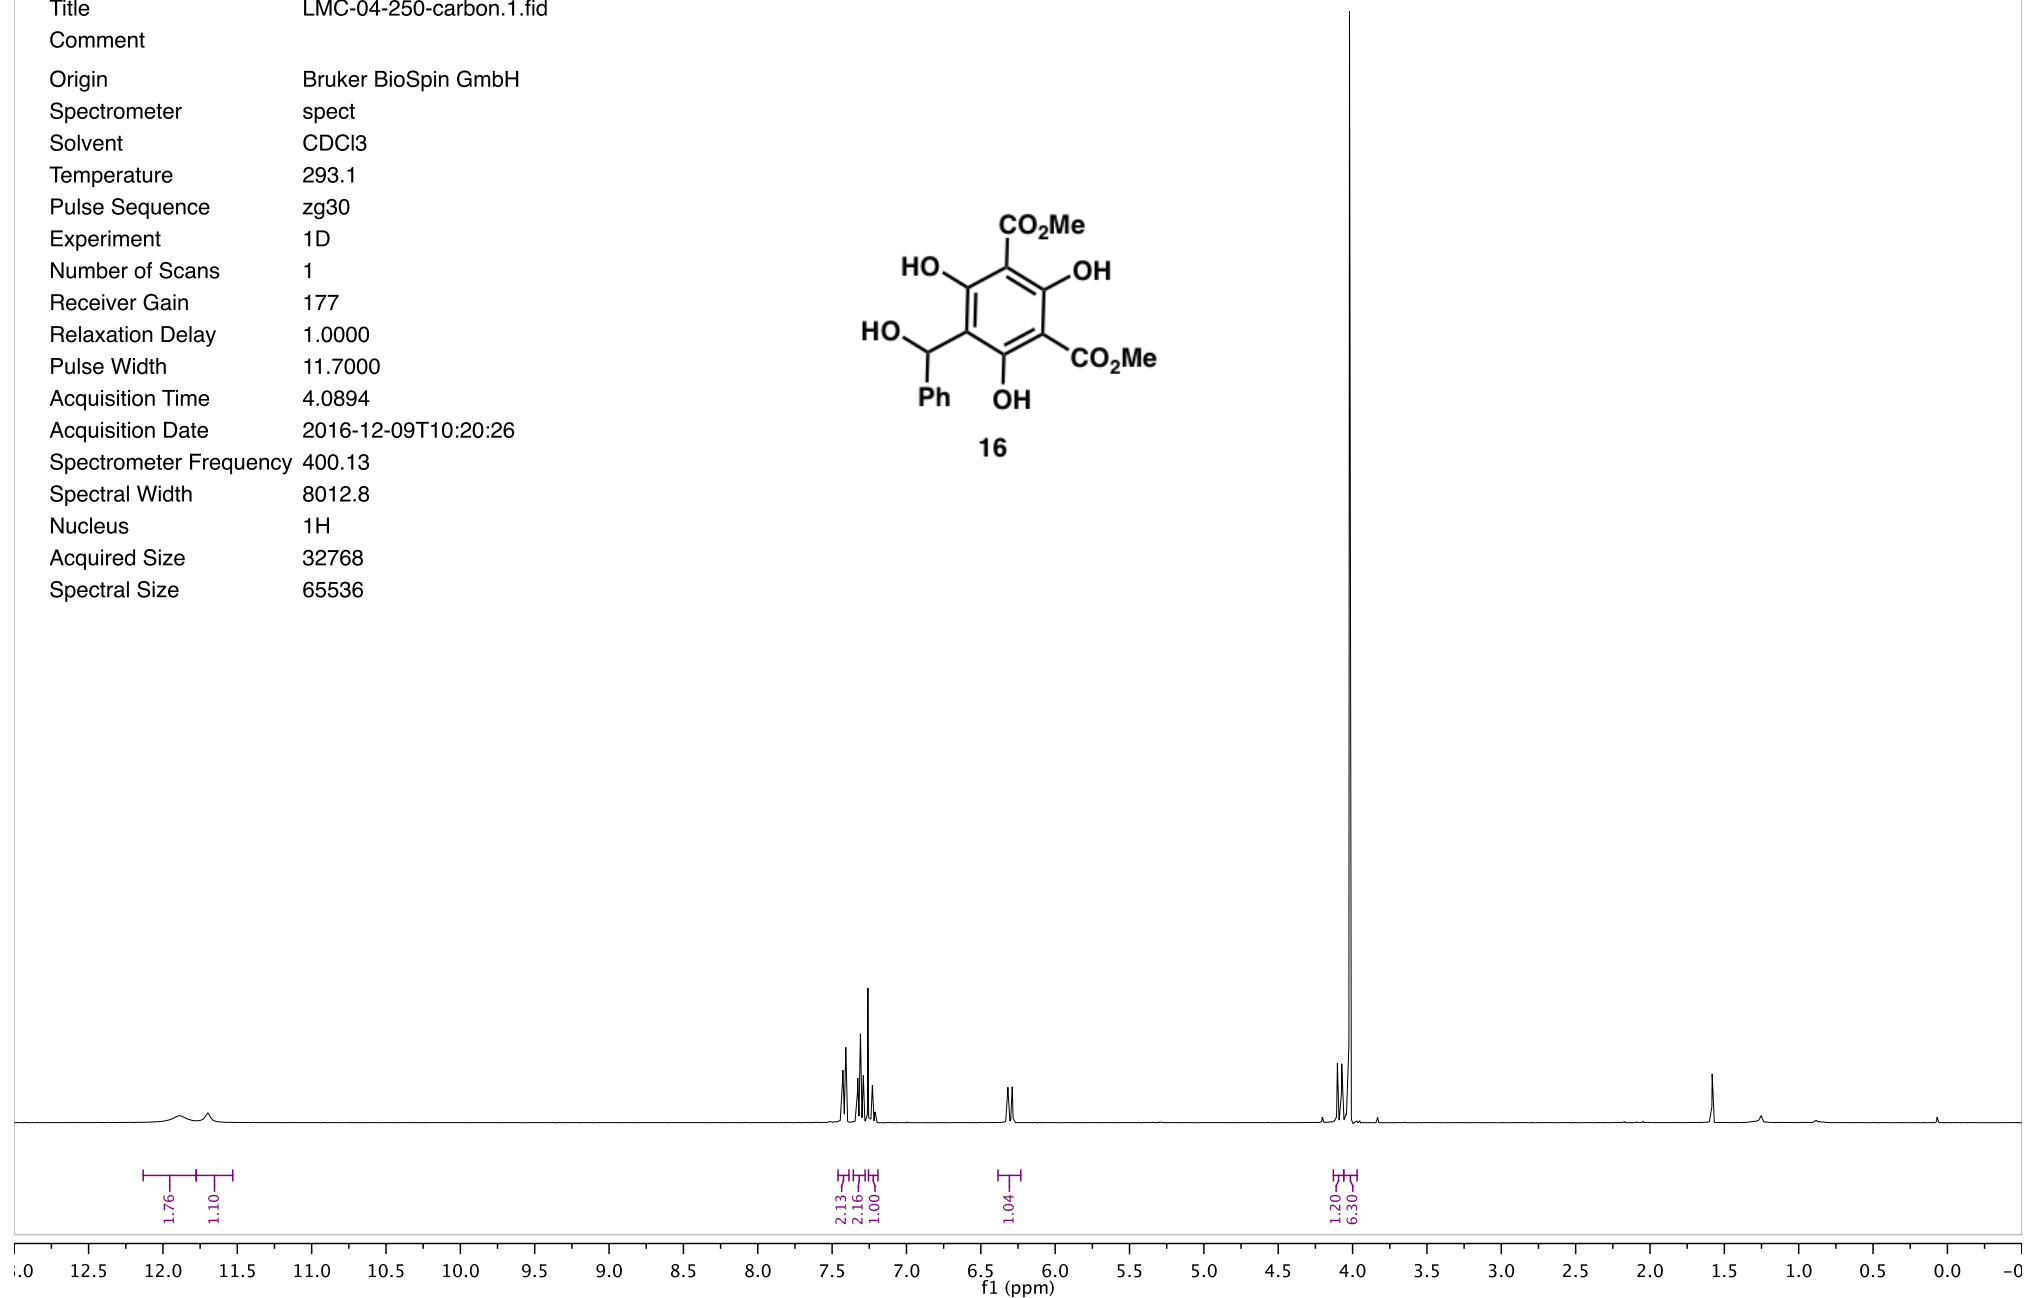

| Parameter              | Value                                                        |
|------------------------|--------------------------------------------------------------|
| Data File Name         | / Volumes/ nmrdata/ lchapman/ nmr/ LMC-04-250-carbon/ 2/ fid |
| Title                  | LMC-04-250-carbon.2.fid                                      |
| Origin                 | Bruker BioSpin GmbH                                          |
| Spectrometer           | spect                                                        |
| Solvent                | CDCl3                                                        |
| Temperature            | 293.2                                                        |
| Pulse Sequence         | zgpg30                                                       |
| Experiment             | 1D                                                           |
| Number of Scans        | 512                                                          |
| Receiver Gain          | 88                                                           |
| Relaxation Delay       | 2.0000                                                       |
| Pulse Width            | 10.0000                                                      |
| Acquisition Time       | 1.3631                                                       |
| Acquisition Date       | 2016-12-09T10:50:19                                          |
| Spectrometer Frequency | 100.62                                                       |
| Spectral Width         | 24038.5                                                      |
| Nucleus                | <sup>13</sup> C                                              |
| Acquired Size          | 32768                                                        |
| Spectral Size          | 65536                                                        |

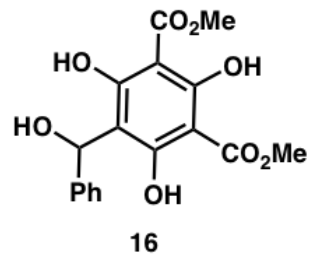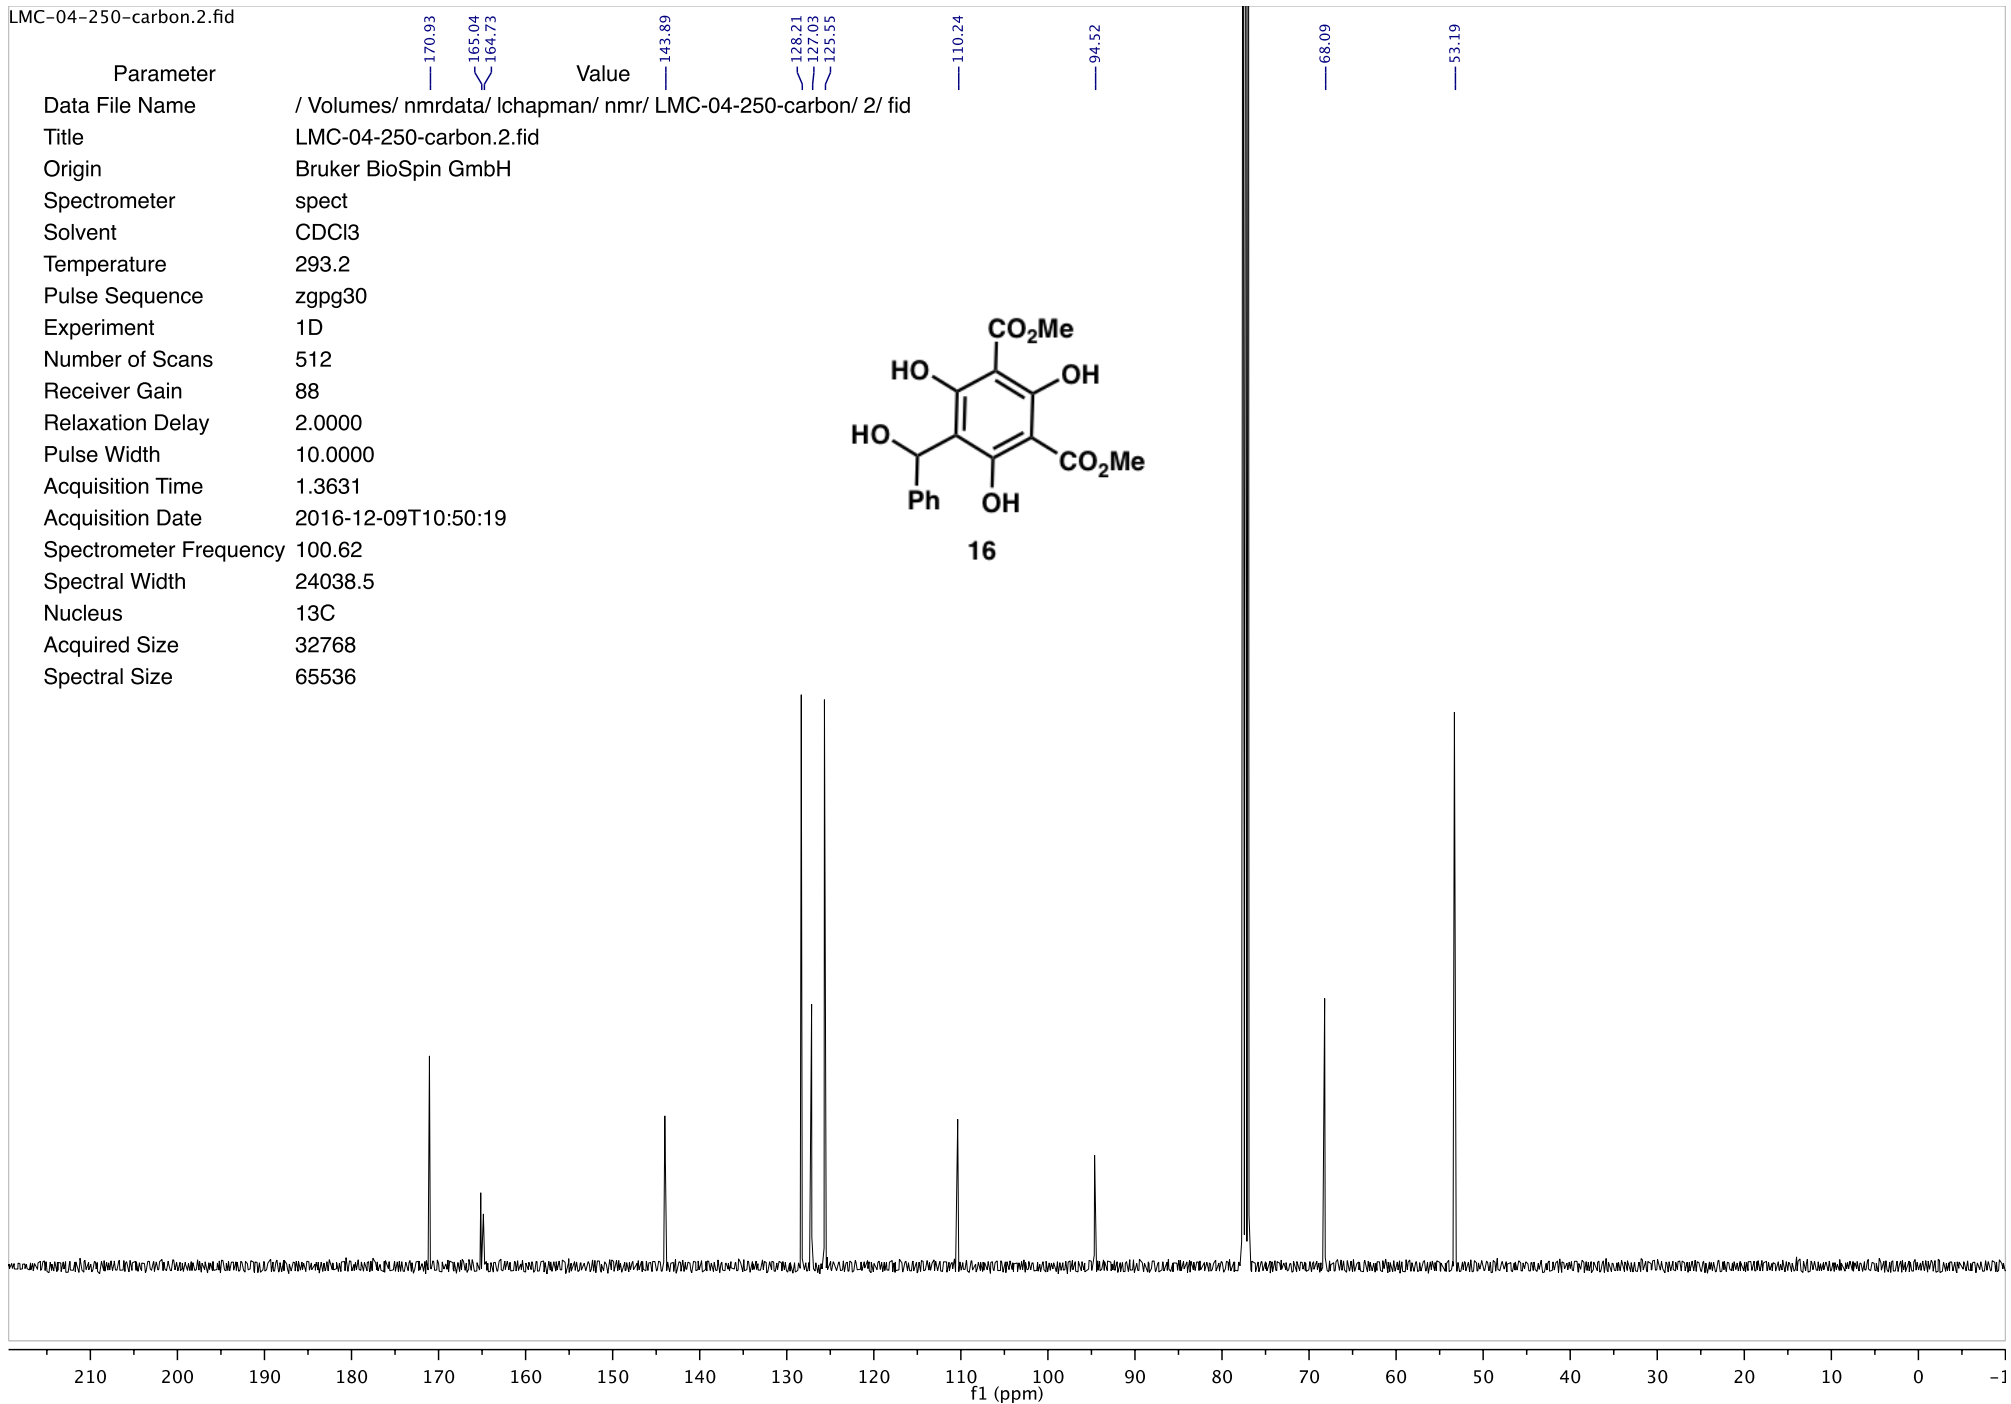

| Parameter              | Value                                                         |
|------------------------|---------------------------------------------------------------|
| Data File Name         | / Volumes/ nmrdata/ lchapman/ nmr/ LMC-04-253-HPLC-P2/ 1/ fid |
| Title                  | LMC-04-253-HPLC-P2.1.fid                                      |
| Origin                 | Bruker BioSpin GmbH                                           |
| Spectrometer           | spect                                                         |
| Solvent                | CDCl3                                                         |
| Temperature            | 295.0                                                         |
| Pulse Sequence         | zg30                                                          |
| Experiment             | 1D                                                            |
| Number of Scans        | 1                                                             |
| Receiver Gain          | 197                                                           |
| Relaxation Delay       | 1.0000                                                        |
| Pulse Width            | 11.7000                                                       |
| Acquisition Time       | 4.0894                                                        |
| Acquisition Date       | 2016-12-21T04:34:12                                           |
| Spectrometer Frequency | 400.13                                                        |
| Spectral Width         | 8012.8                                                        |
| Nucleus                | 1H                                                            |
| Acquired Size          | 32768                                                         |
| Spectral Size          | 65536                                                         |

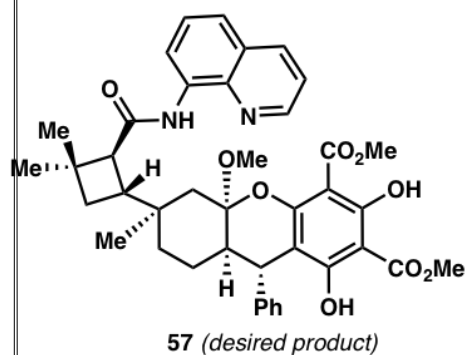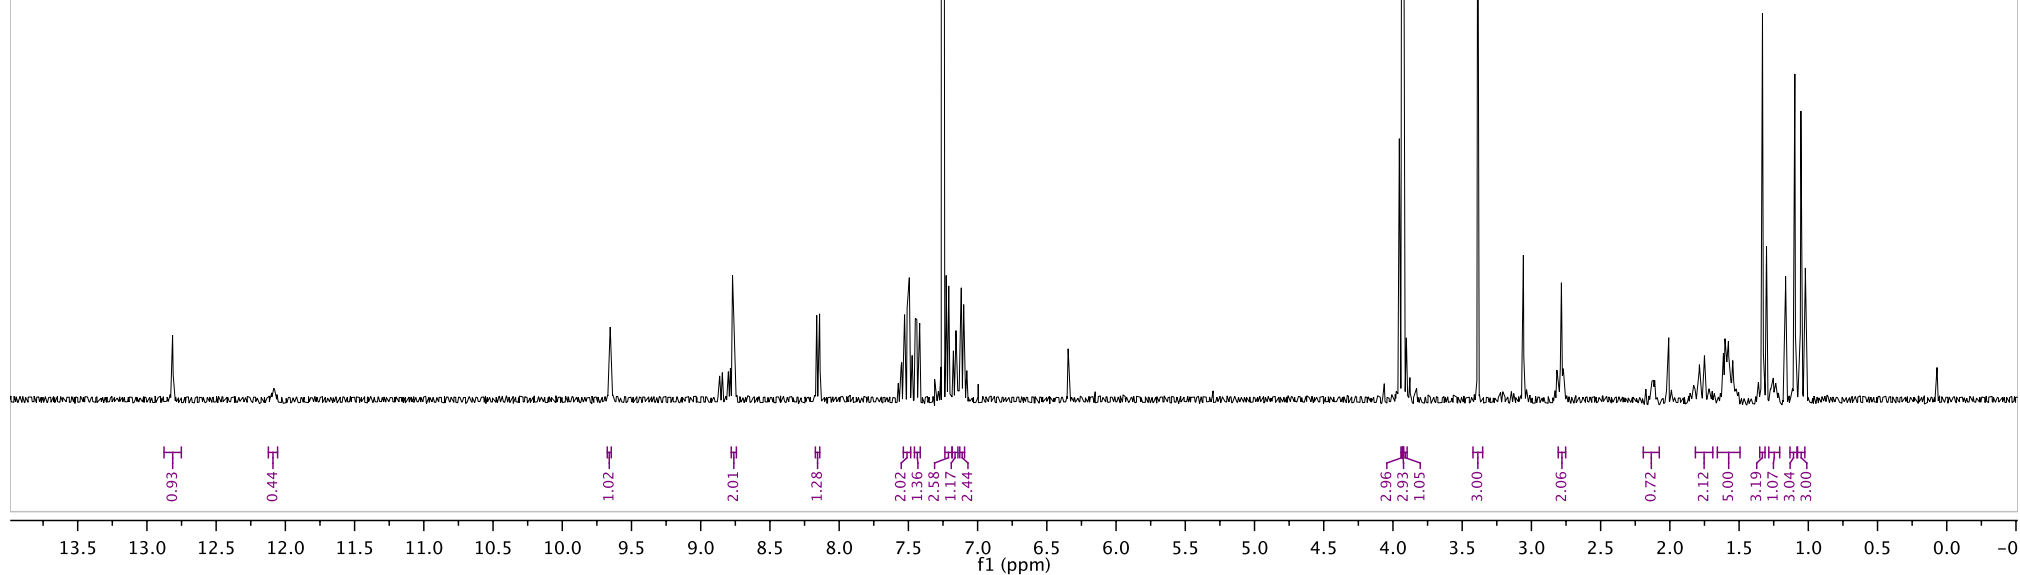

Parameter

Data File Name / Volumes/nmrdata/lchapman/nmr/ LMC-04-253-HPLC-P2/ 3/ fid  
 Title LMC-04-253-HPLC-P2.3.fid  
 Comment  
 Origin Bruker BioSpin GmbH  
 Spectrometer spect  
 Solvent CDCl3  
 Temperature 294.9  
 Pulse Sequence zgpg30  
 Experiment 1D  
 Number of Scans 1024  
 Receiver Gain 64  
 Relaxation Delay 2.0000  
 Pulse Width 10.0000  
 Acquisition Time 1.3631  
 Acquisition Date 2016-12-21T05:49:49  
 Spectrometer Frequency 100.62  
 Spectral Width 24038.5  
 Nucleus 13C  
 Acquired Size 32768  
 Spectral Size 65536

Value |  
 171.38  
 170.84  
 169.95  
 165.97  
 164.67  
 158.87  
 148.31  
 145.88  
 138.49  
 136.45  
 134.68  
 128.10  
 128.08  
 127.75  
 127.57  
 125.98  
 121.69  
 121.30  
 116.29  
 104.16  
 104.10  
 97.12  
 95.65

52.72  
 52.69  
 52.15  
 48.96  
 44.16  
 41.66  
 39.89  
 37.69  
 35.13  
 35.05  
 33.92  
 30.80  
 28.89  
 23.96  
 23.51  
 22.84

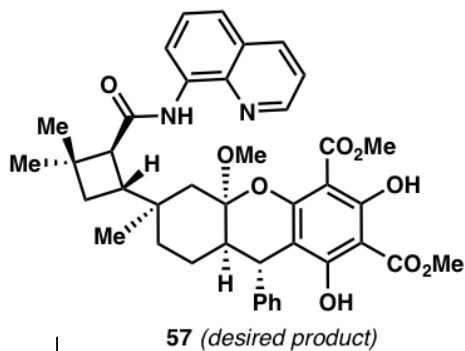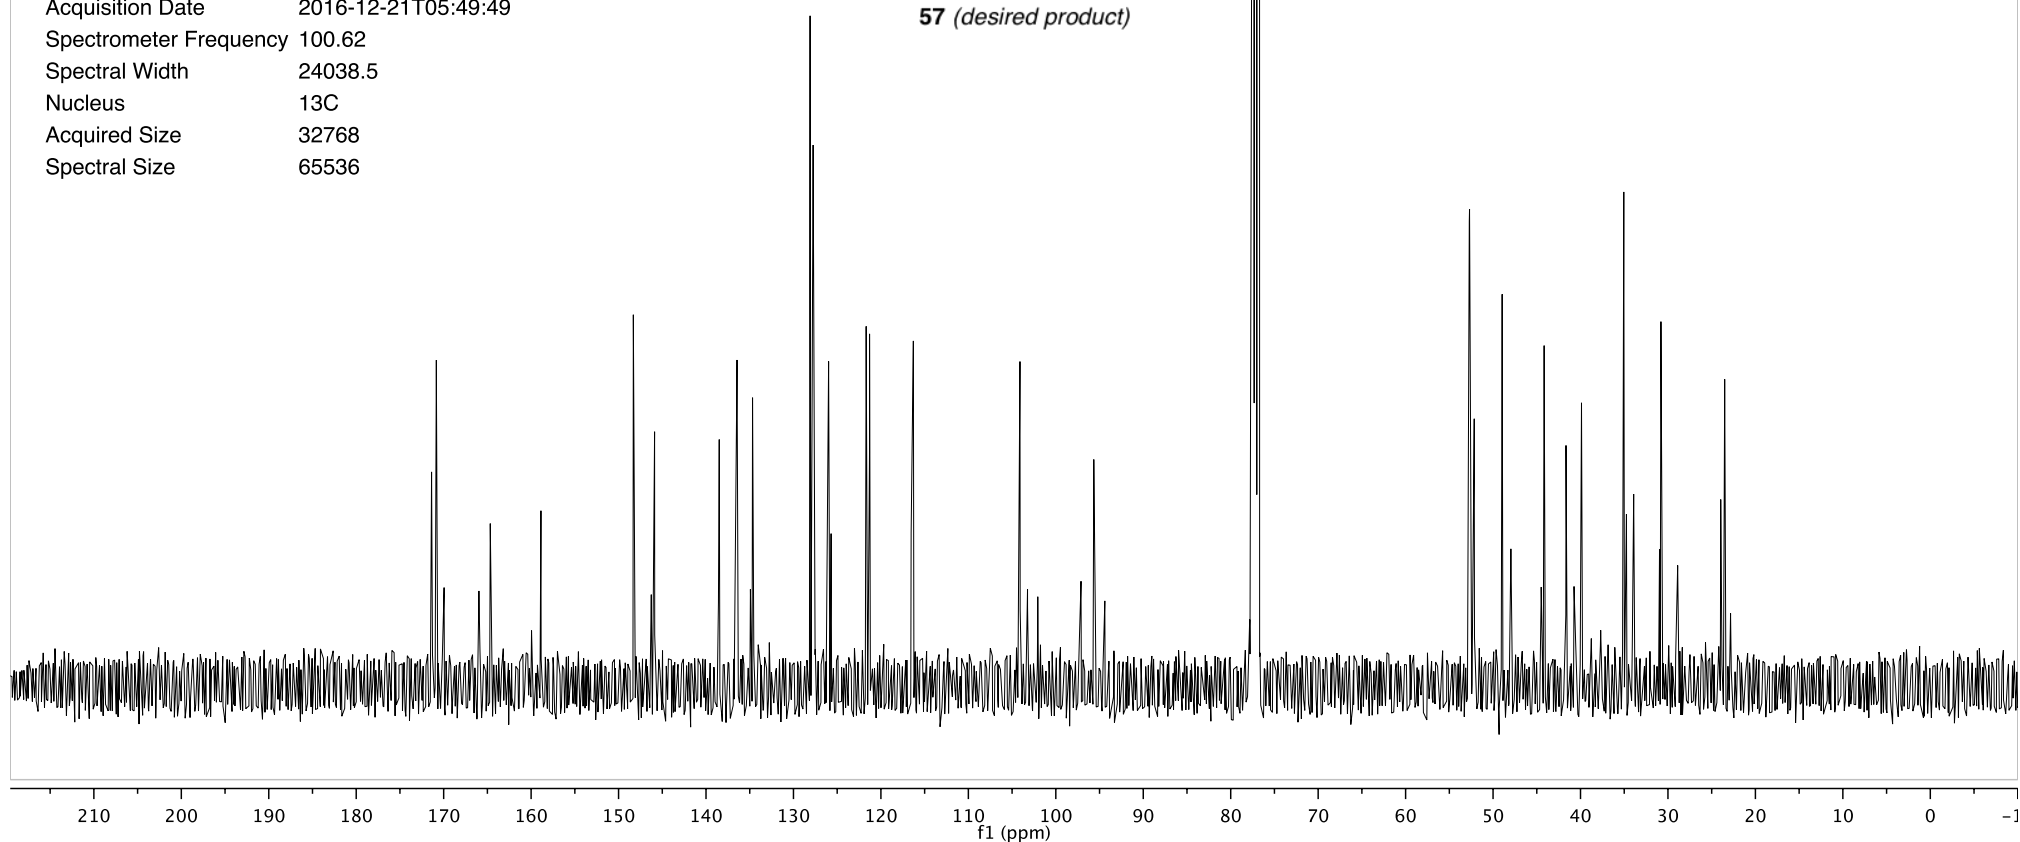



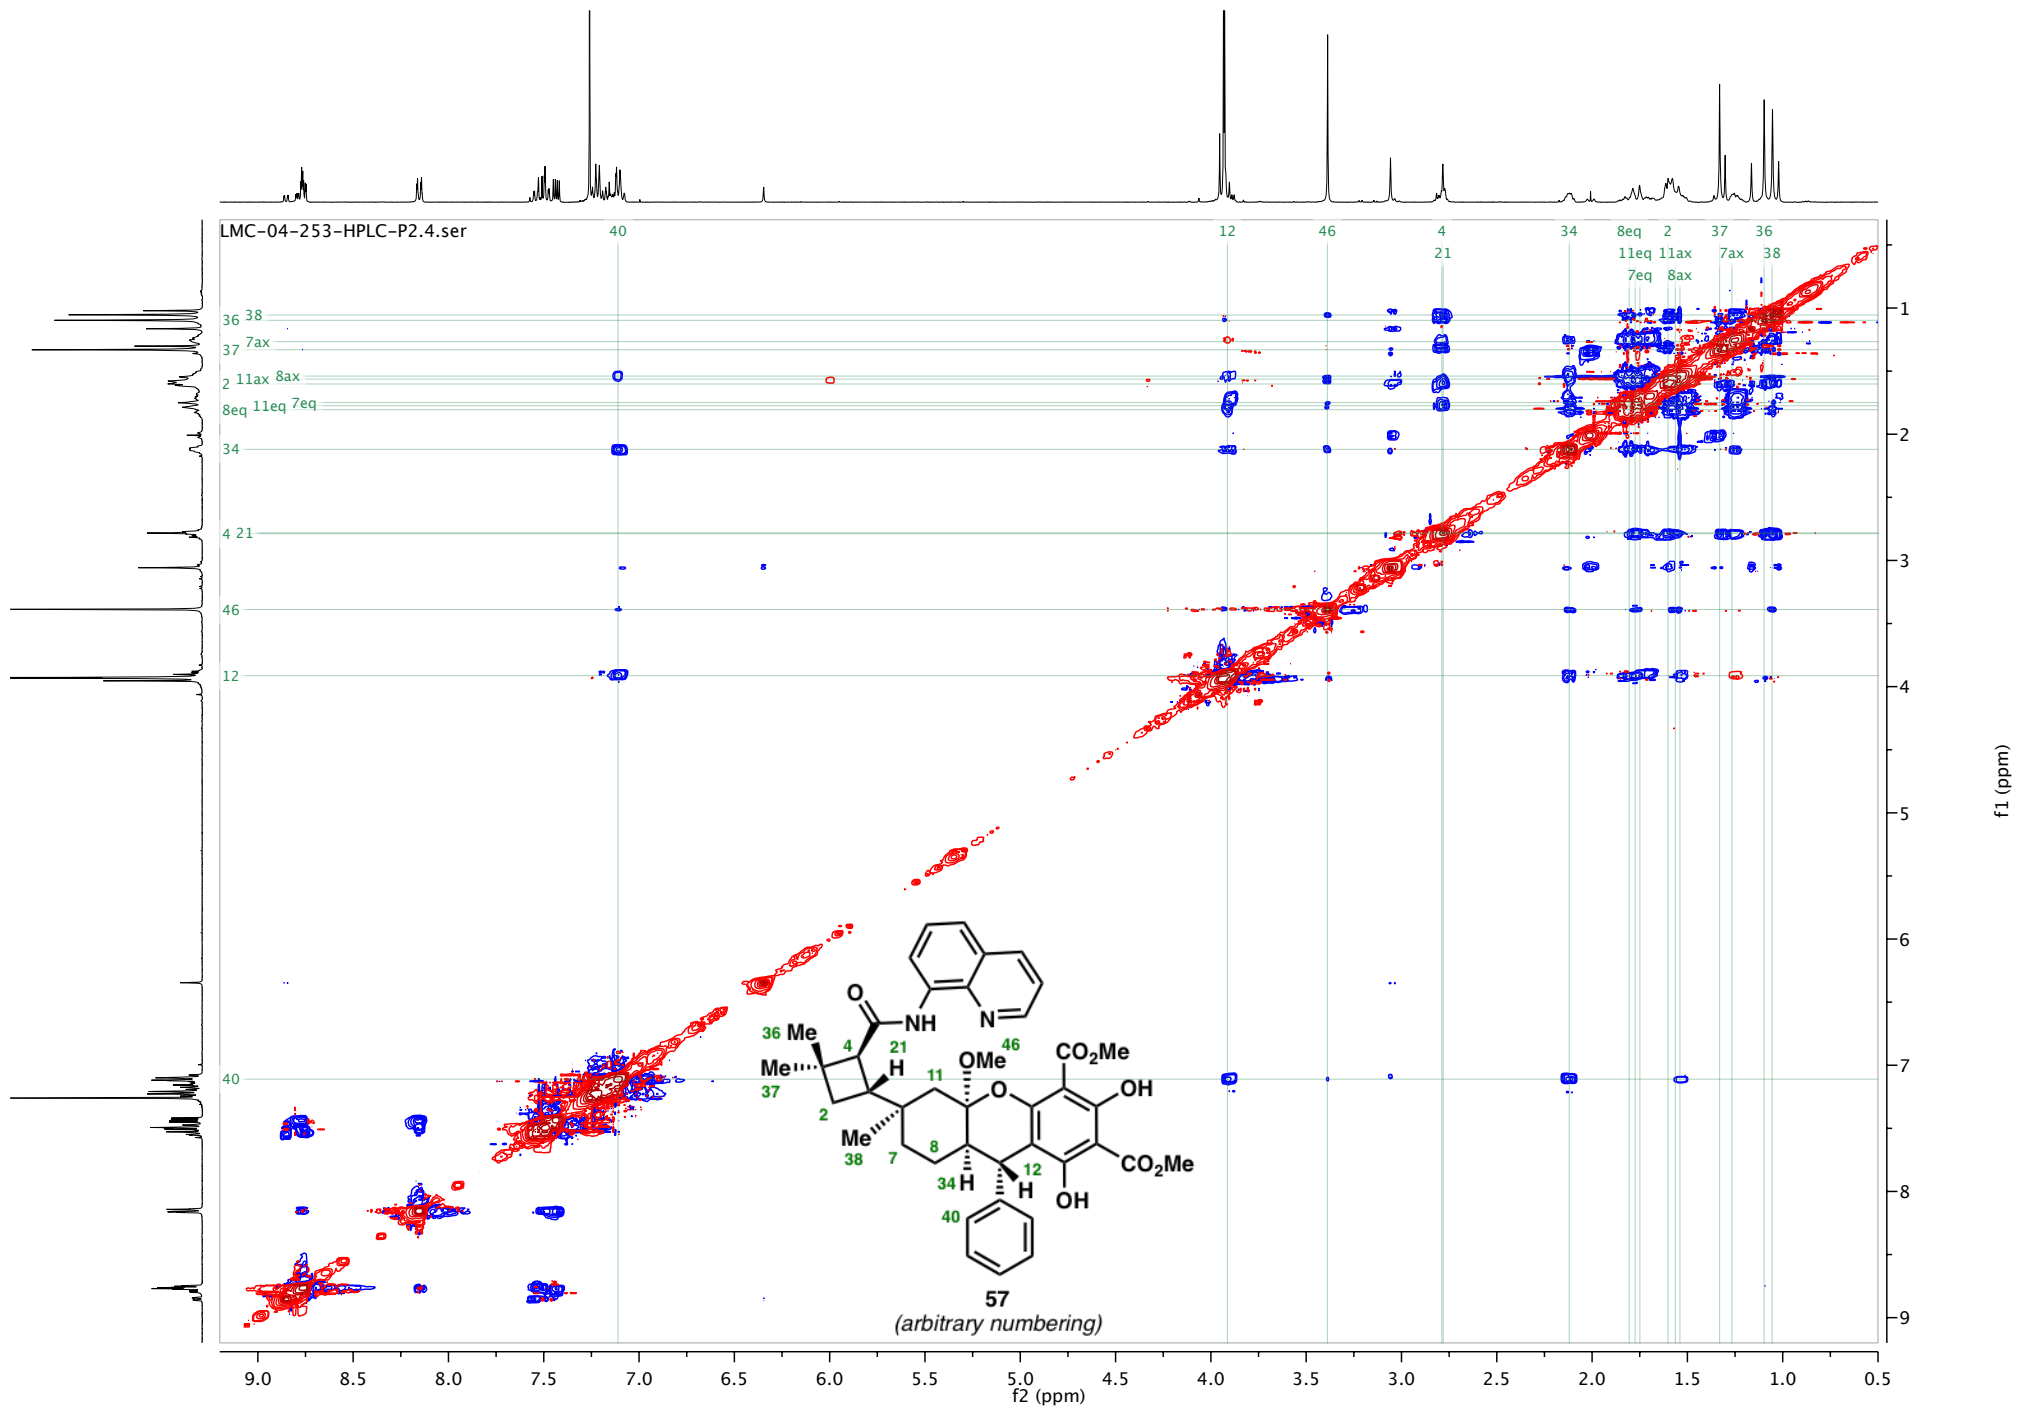

| Parameter              | Value                                                         |
|------------------------|---------------------------------------------------------------|
| Data File Name         | / Volumes/ nmrdata/ lchapman/ nmr/ LMC-04-253-HPLC-P1/ 1/ fid |
| Title                  | LMC-04-253-HPLC-P1.1.fid                                      |
| Origin                 | Bruker BioSpin GmbH                                           |
| Spectrometer           | spect                                                         |
| Solvent                | CDCl3                                                         |
| Temperature            | 295.0                                                         |
| Pulse Sequence         | zg30                                                          |
| Experiment             | 1D                                                            |
| Number of Scans        | 1                                                             |
| Receiver Gain          | 177                                                           |
| Relaxation Delay       | 1.0000                                                        |
| Pulse Width            | 11.7000                                                       |
| Acquisition Time       | 4.0894                                                        |
| Acquisition Date       | 2016-12-20T21:11:31                                           |
| Spectrometer Frequency | 400.13                                                        |
| Spectral Width         | 8012.8                                                        |
| Nucleus                | 1H                                                            |
| Acquired Size          | 32768                                                         |
| Spectral Size          | 65536                                                         |

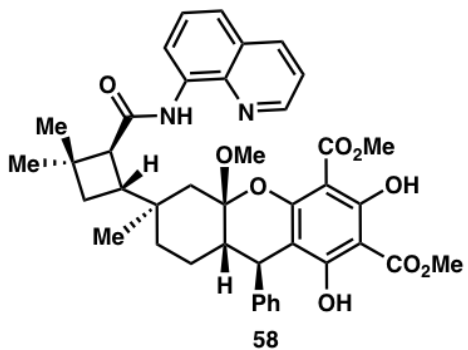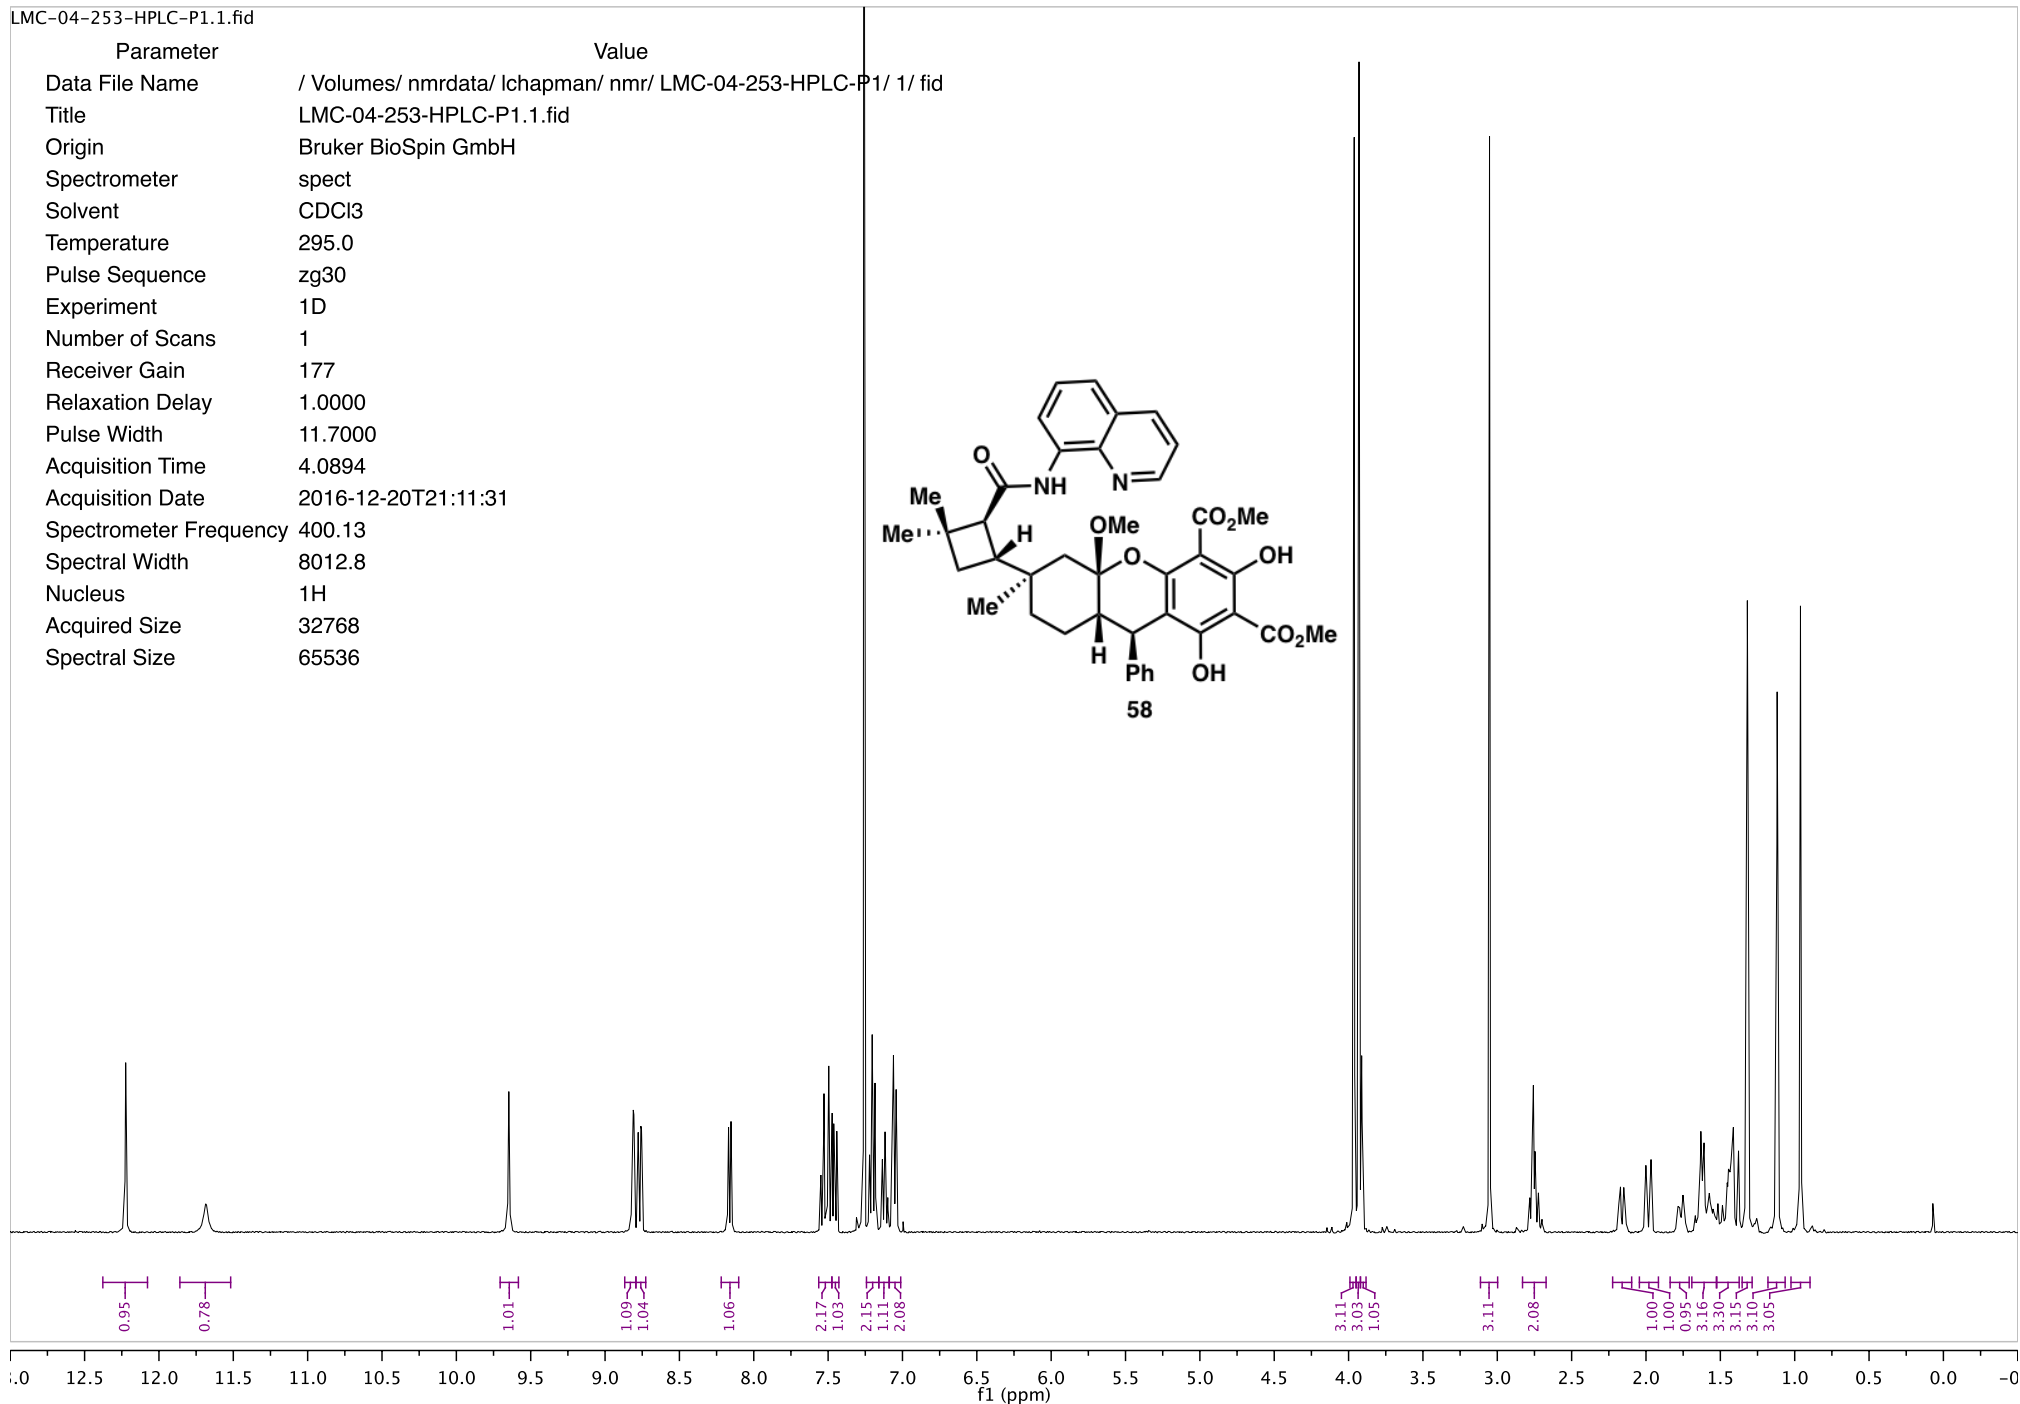

| Parameter              | Value                                                         |
|------------------------|---------------------------------------------------------------|
| Data File Name         | / Volumes/ nmrdata/ lchapman/ nmr/ LMC-04-253-HPLC-P1/ 3/ fid |
| Title                  | LMC-04-253-HPLC-P1.3.fid                                      |
| Origin                 | Bruker BioSpin GmbH                                           |
| Spectrometer           | spect                                                         |
| Solvent                | CDCl3                                                         |
| Temperature            | 295.0                                                         |
| Pulse Sequence         | zgpg30                                                        |
| Experiment             | 1D                                                            |
| Number of Scans        | 512                                                           |
| Receiver Gain          | 64                                                            |
| Relaxation Delay       | 2.0000                                                        |
| Pulse Width            | 10.0000                                                       |
| Acquisition Time       | 1.3631                                                        |
| Acquisition Date       | 2016-12-20T21:57:47                                           |
| Spectrometer Frequency | 100.62                                                        |
| Spectral Width         | 24038.5                                                       |
| Nucleus                | 13C                                                           |
| Acquired Size          | 32768                                                         |
| Spectral Size          | 65536                                                         |

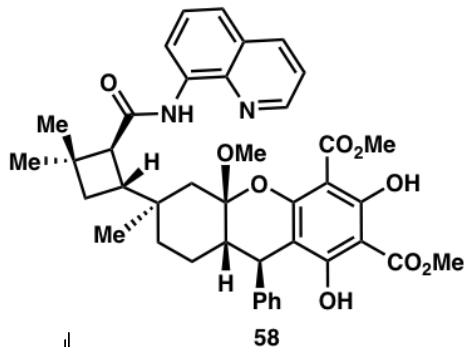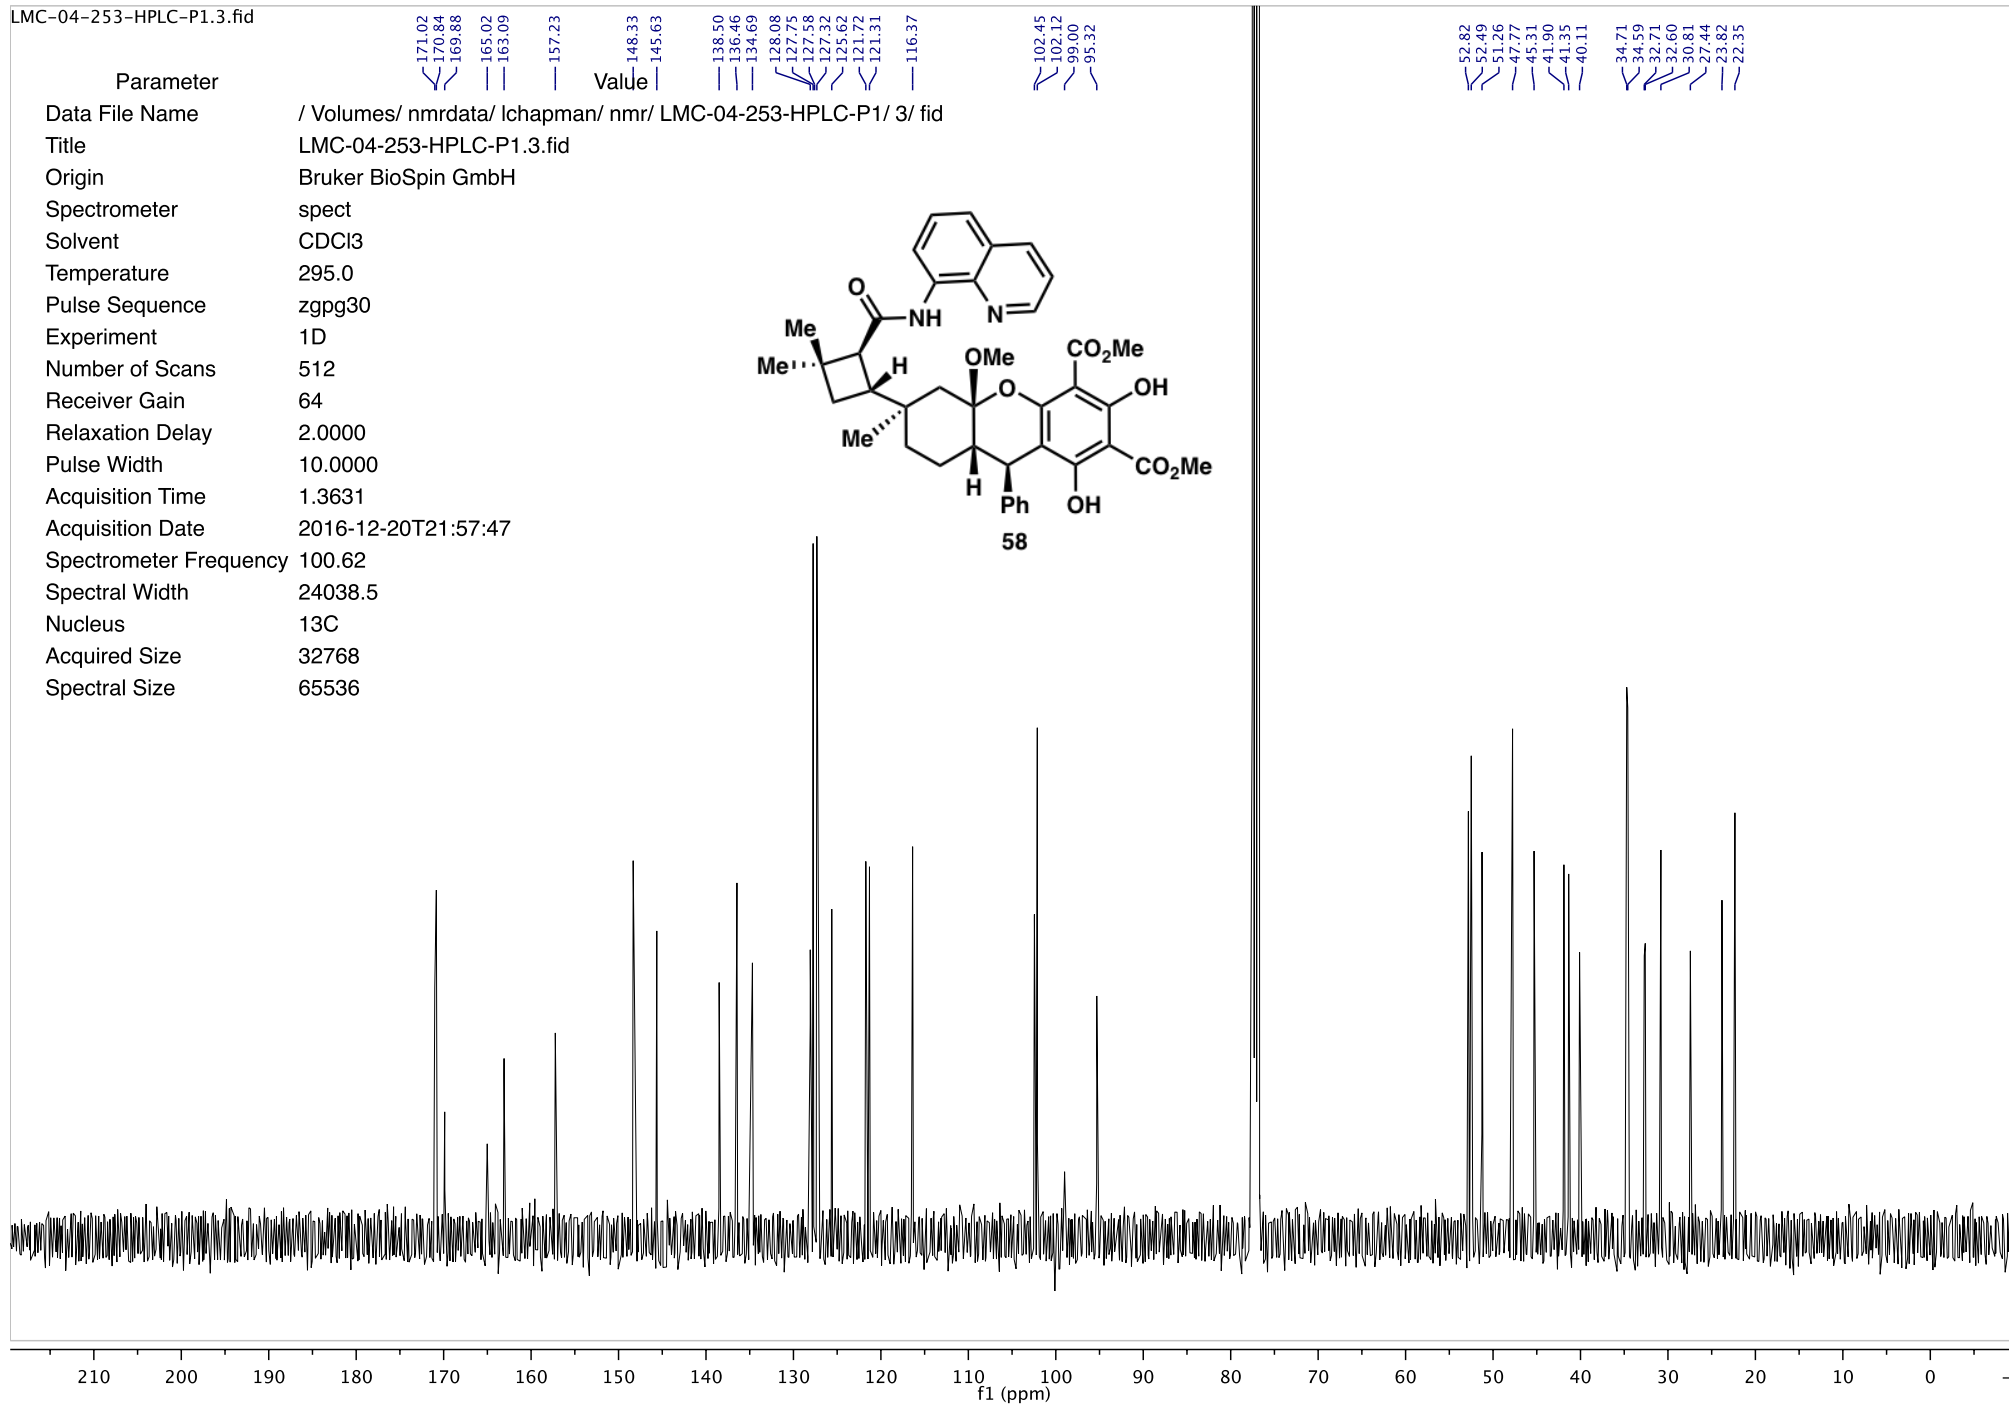

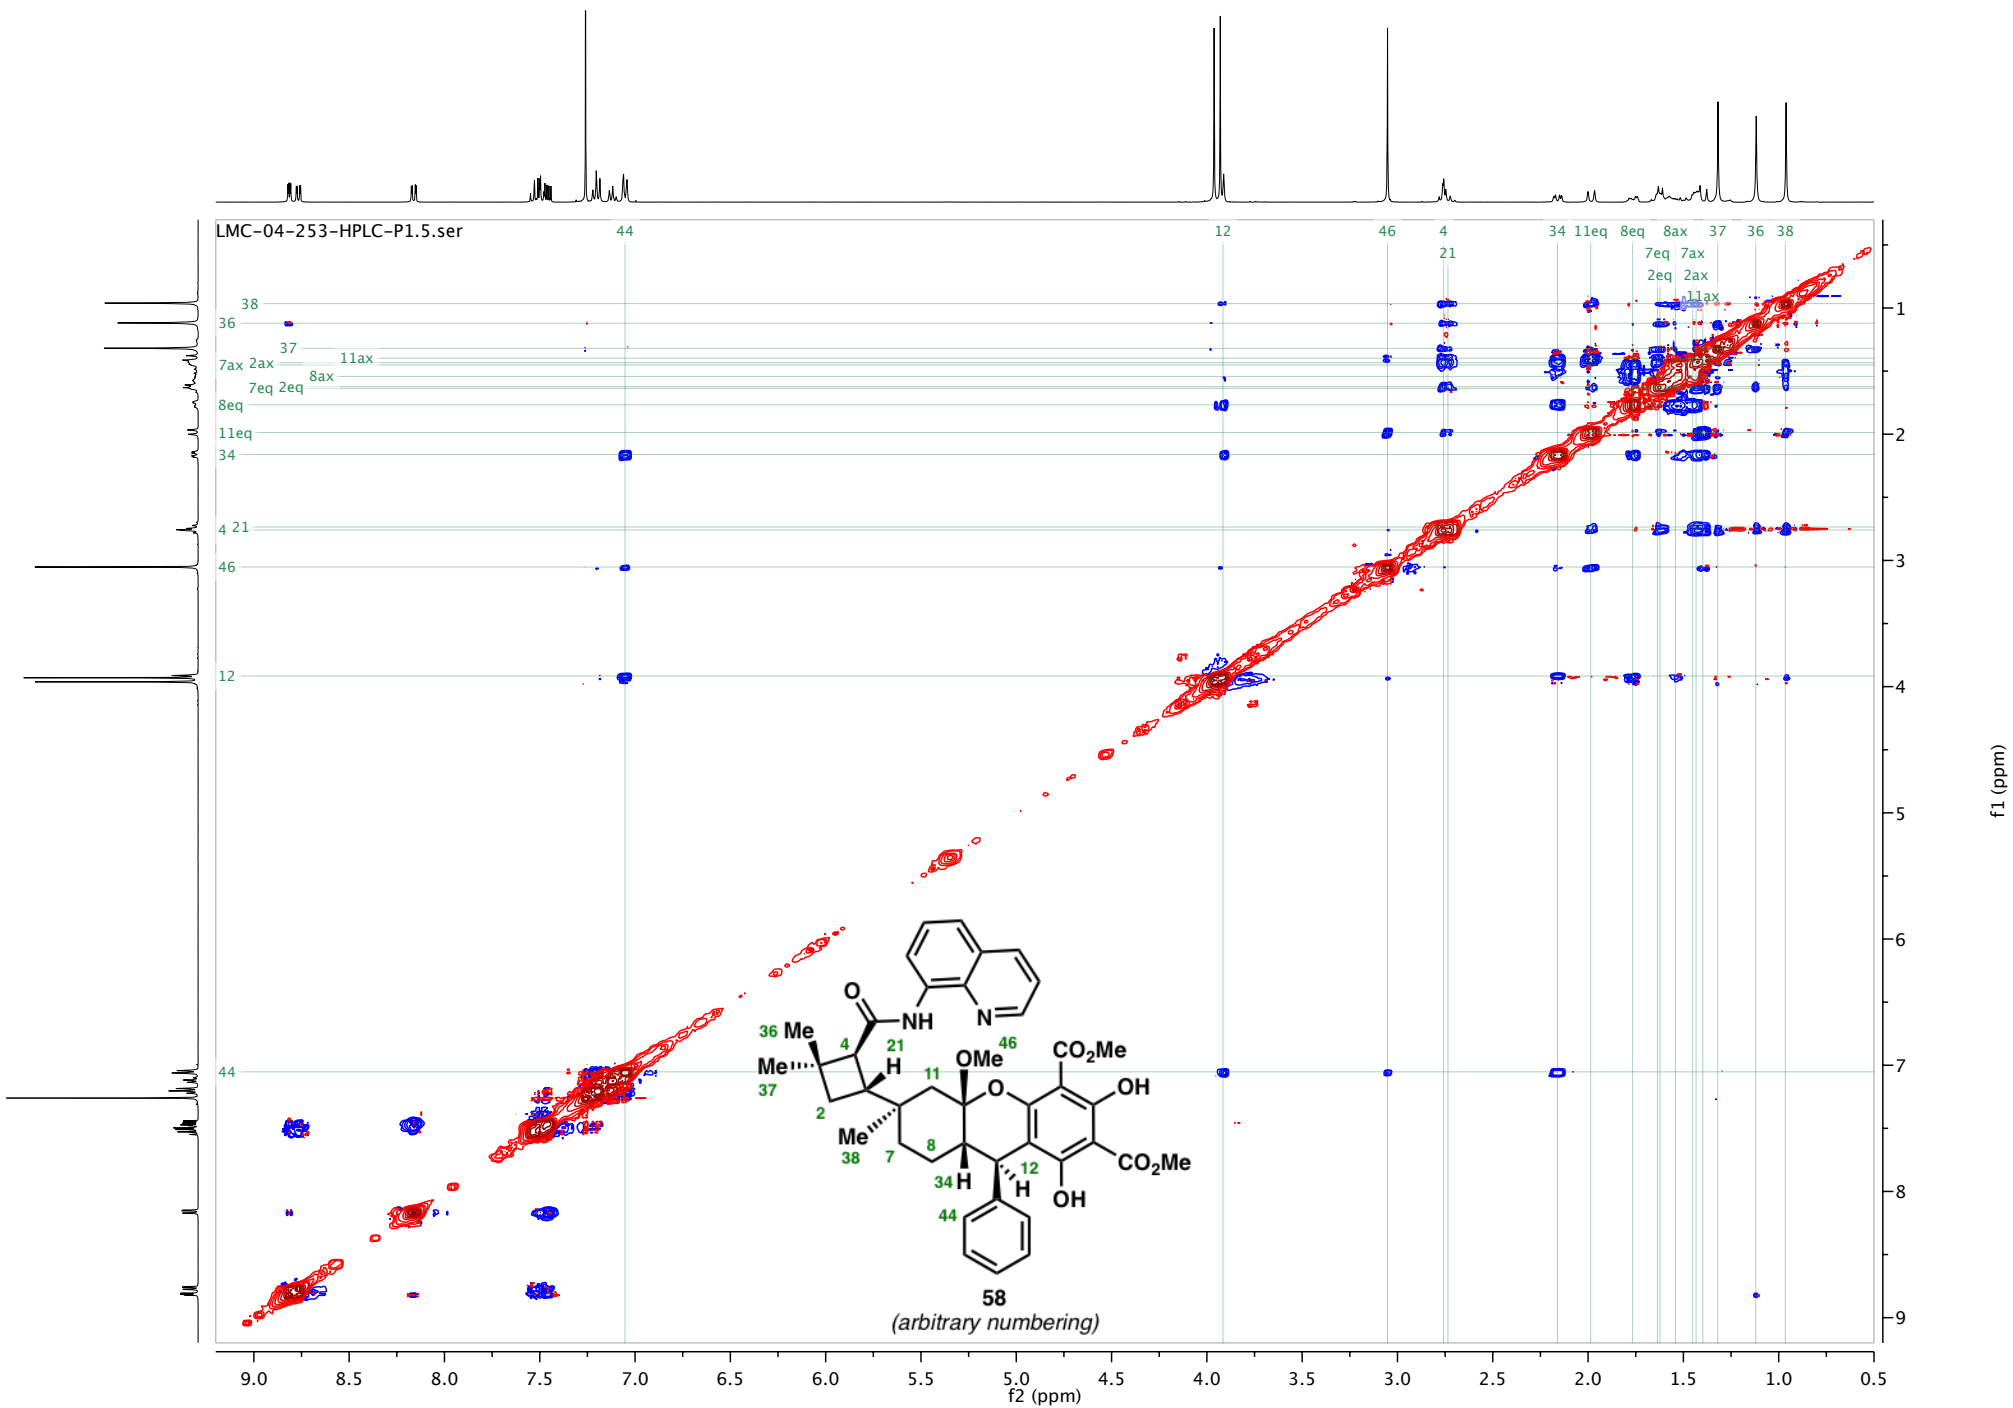

| Parameter              | Value                                                         |
|------------------------|---------------------------------------------------------------|
| Data File Name         | / Volumes/ nmrdata/ lchapman/ nmr/ LMC-04-253-HPLC-P3/ 1/ fid |
| Title                  | LMC-04-253-HPLC-P3.1.fid                                      |
| Origin                 | Bruker BioSpin GmbH                                           |
| Spectrometer           | spect                                                         |
| Solvent                | CDCl3                                                         |
| Temperature            | 295.0                                                         |
| Pulse Sequence         | zg30                                                          |
| Experiment             | 1D                                                            |
| Number of Scans        | 1                                                             |
| Receiver Gain          | 197                                                           |
| Relaxation Delay       | 1.0000                                                        |
| Pulse Width            | 11.7000                                                       |
| Acquisition Time       | 4.0894                                                        |
| Acquisition Date       | 2016-12-20T23:17:16                                           |
| Spectrometer Frequency | 400.13                                                        |
| Spectral Width         | 8012.8                                                        |
| Nucleus                | 1H                                                            |
| Acquired Size          | 32768                                                         |
| Spectral Size          | 65536                                                         |

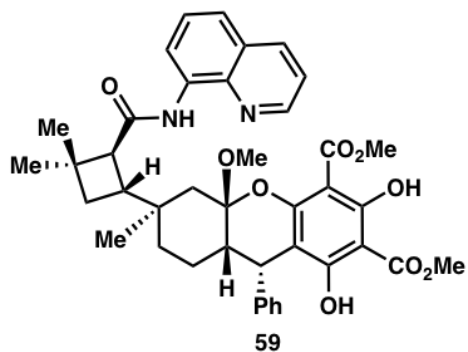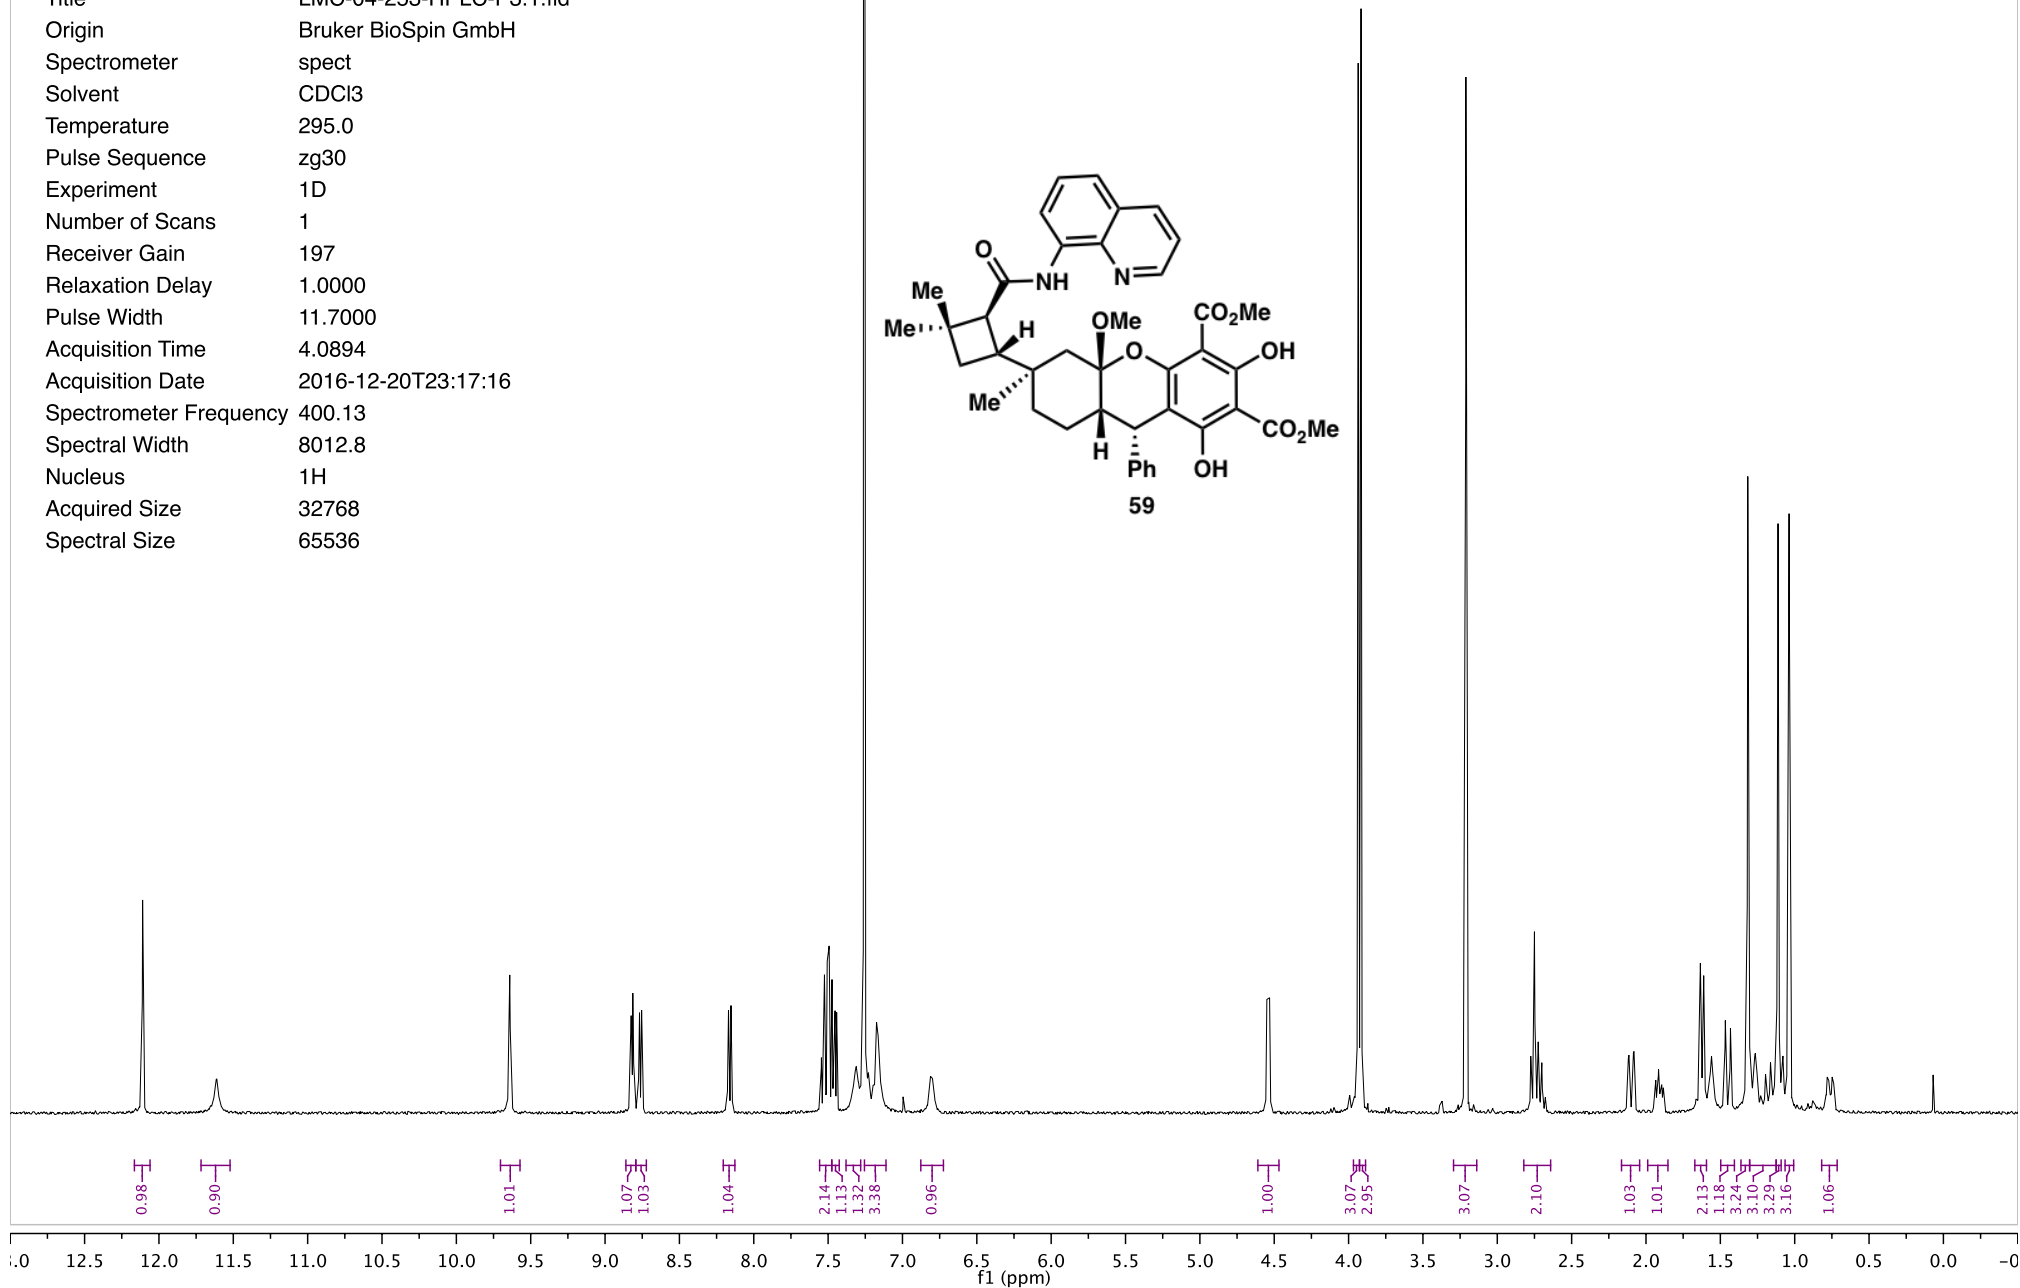

| Parameter              | Value                                                         |
|------------------------|---------------------------------------------------------------|
| Data File Name         | / Volumes/ nmrdata/ lchapman/ nmr/ LMC-04-253-HPLC-P3/ 3/ fid |
| Title                  | LMC-04-253-HPLC-P3.3.fid                                      |
| Origin                 | Bruker BioSpin GmbH                                           |
| Spectrometer           | spect                                                         |
| Solvent                | CDCl3                                                         |
| Temperature            | 294.9                                                         |
| Pulse Sequence         | zgpg30                                                        |
| Experiment             | 1D                                                            |
| Number of Scans        | 1024                                                          |
| Receiver Gain          | 72                                                            |
| Relaxation Delay       | 2.0000                                                        |
| Pulse Width            | 10.0000                                                       |
| Acquisition Time       | 1.3631                                                        |
| Acquisition Date       | 2016-12-21T00:32:48                                           |
| Spectrometer Frequency | 100.62                                                        |
| Spectral Width         | 24038.5                                                       |
| Nucleus                | 13C                                                           |
| Acquired Size          | 32768                                                         |
| Spectral Size          | 65536                                                         |

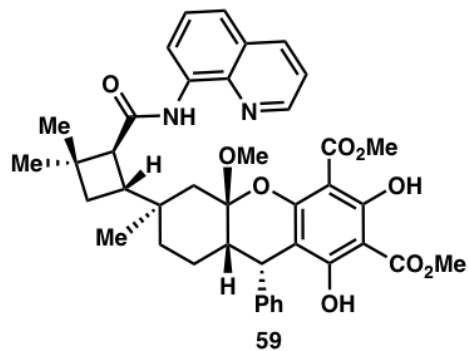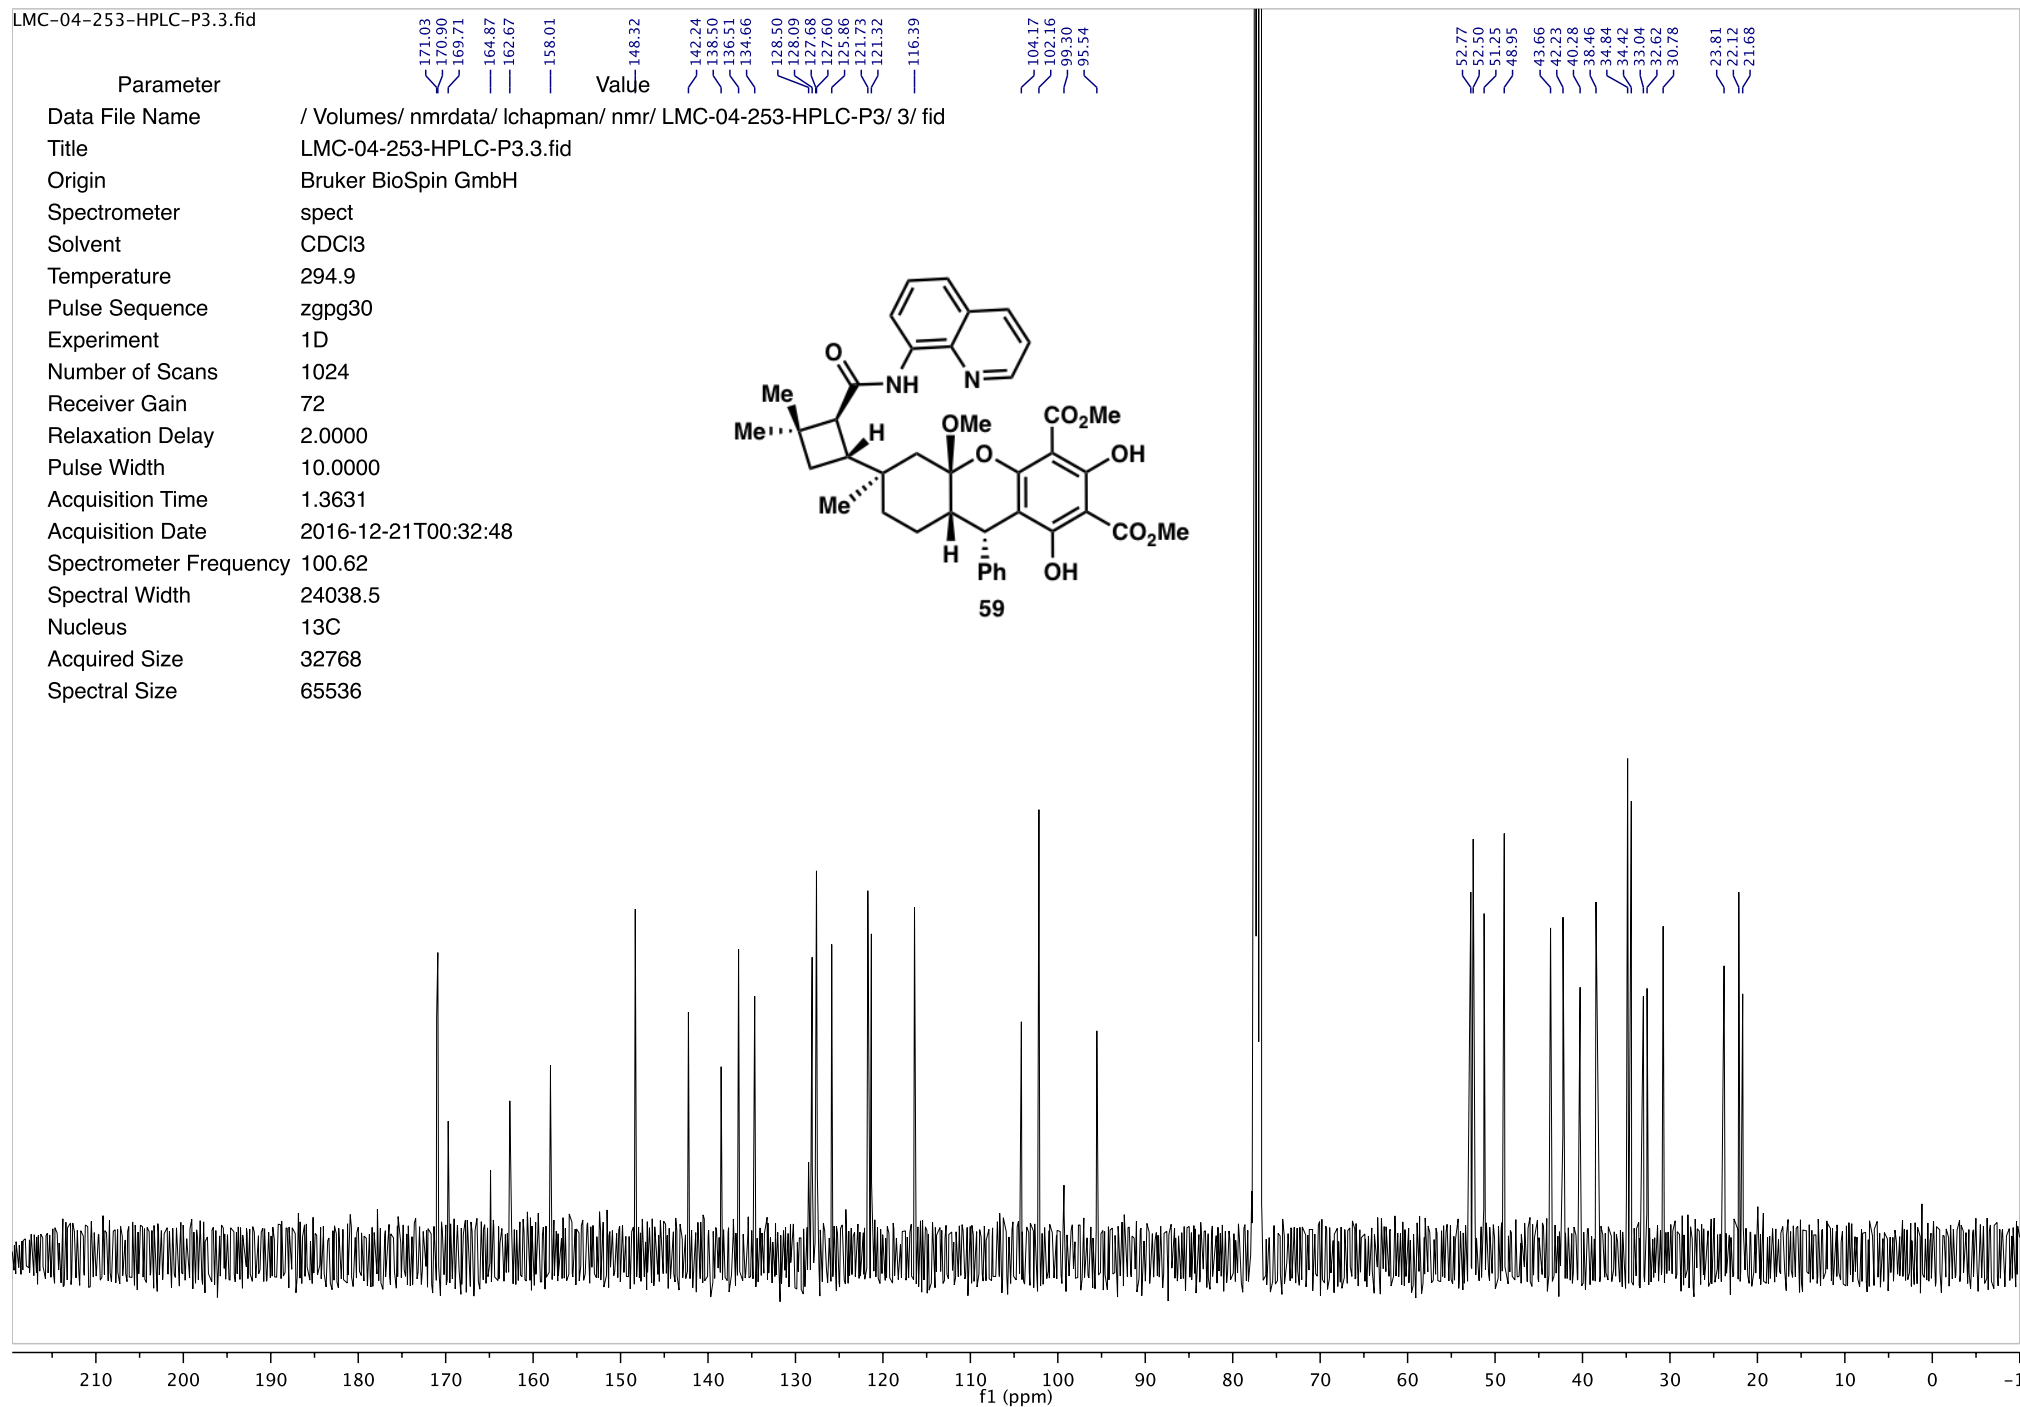

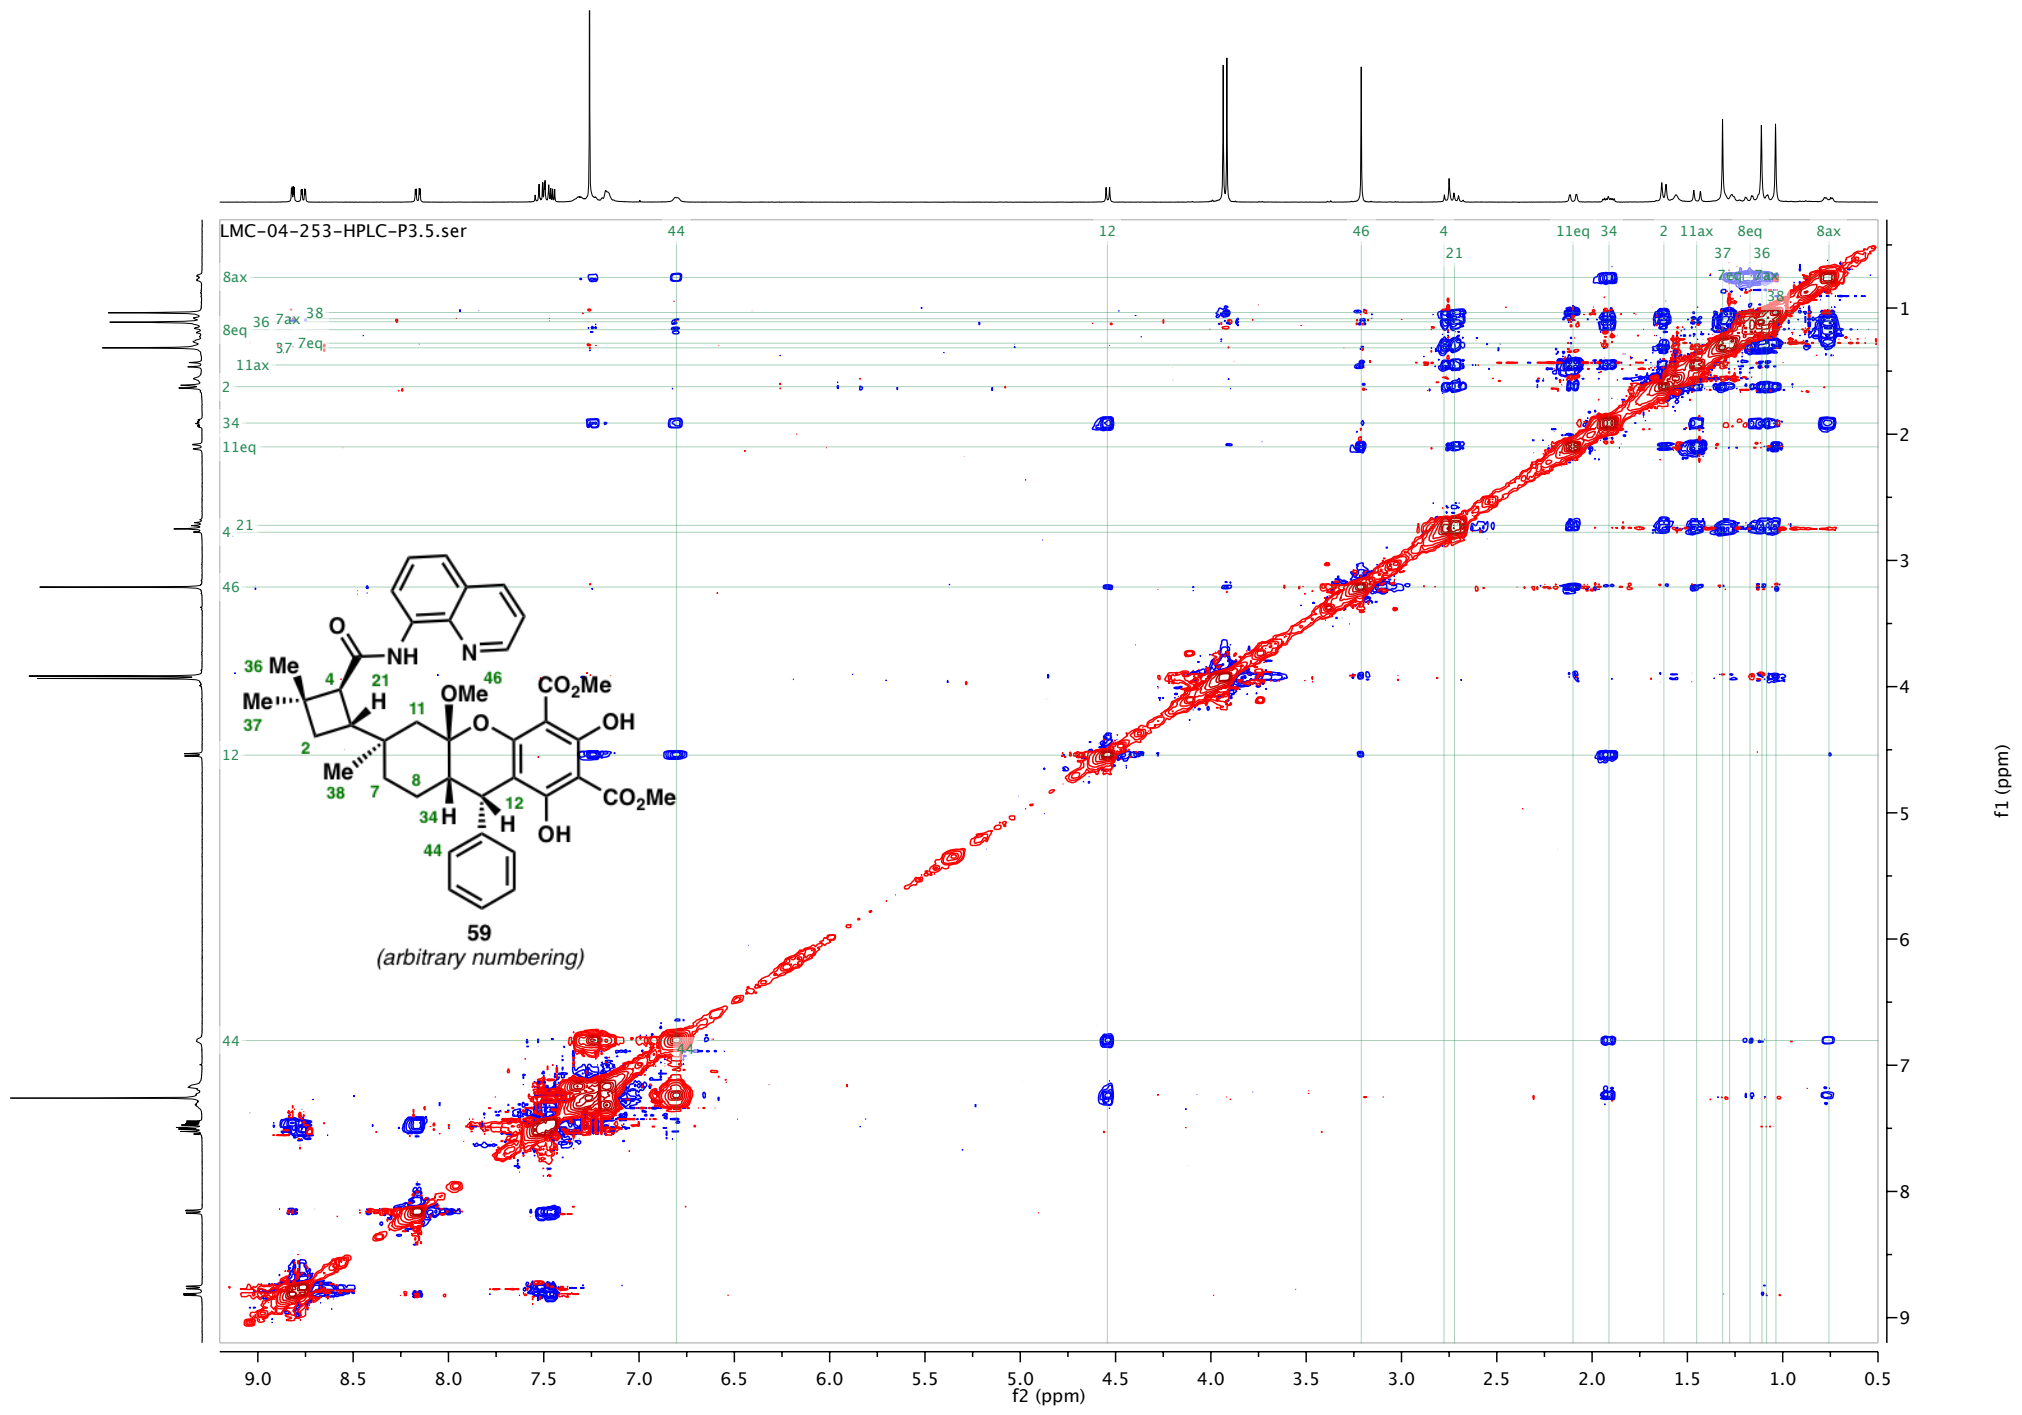

| Parameter              | Value                                                         |
|------------------------|---------------------------------------------------------------|
| Data File Name         | / Volumes/ nmrdata/ lchapman/ nmr/ LMC-04-253-HPLC-P4/ 1/ fid |
| Title                  | LMC-04-253-HPLC-P4.1.fid                                      |
| Origin                 | Bruker BioSpin GmbH                                           |
| Spectrometer           | spect                                                         |
| Solvent                | CDCl3                                                         |
| Temperature            | 294.9                                                         |
| Pulse Sequence         | zg30                                                          |
| Experiment             | 1D                                                            |
| Number of Scans        | 1                                                             |
| Receiver Gain          | 197                                                           |
| Relaxation Delay       | 1.0000                                                        |
| Pulse Width            | 11.7000                                                       |
| Acquisition Time       | 4.0894                                                        |
| Acquisition Date       | 2016-12-21T02:19:19                                           |
| Spectrometer Frequency | 400.13                                                        |
| Spectral Width         | 8012.8                                                        |
| Nucleus                | 1H                                                            |
| Acquired Size          | 32768                                                         |
| Spectral Size          | 65536                                                         |

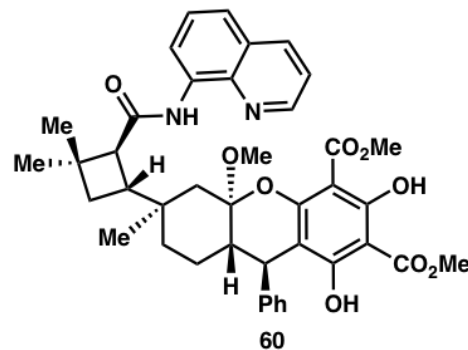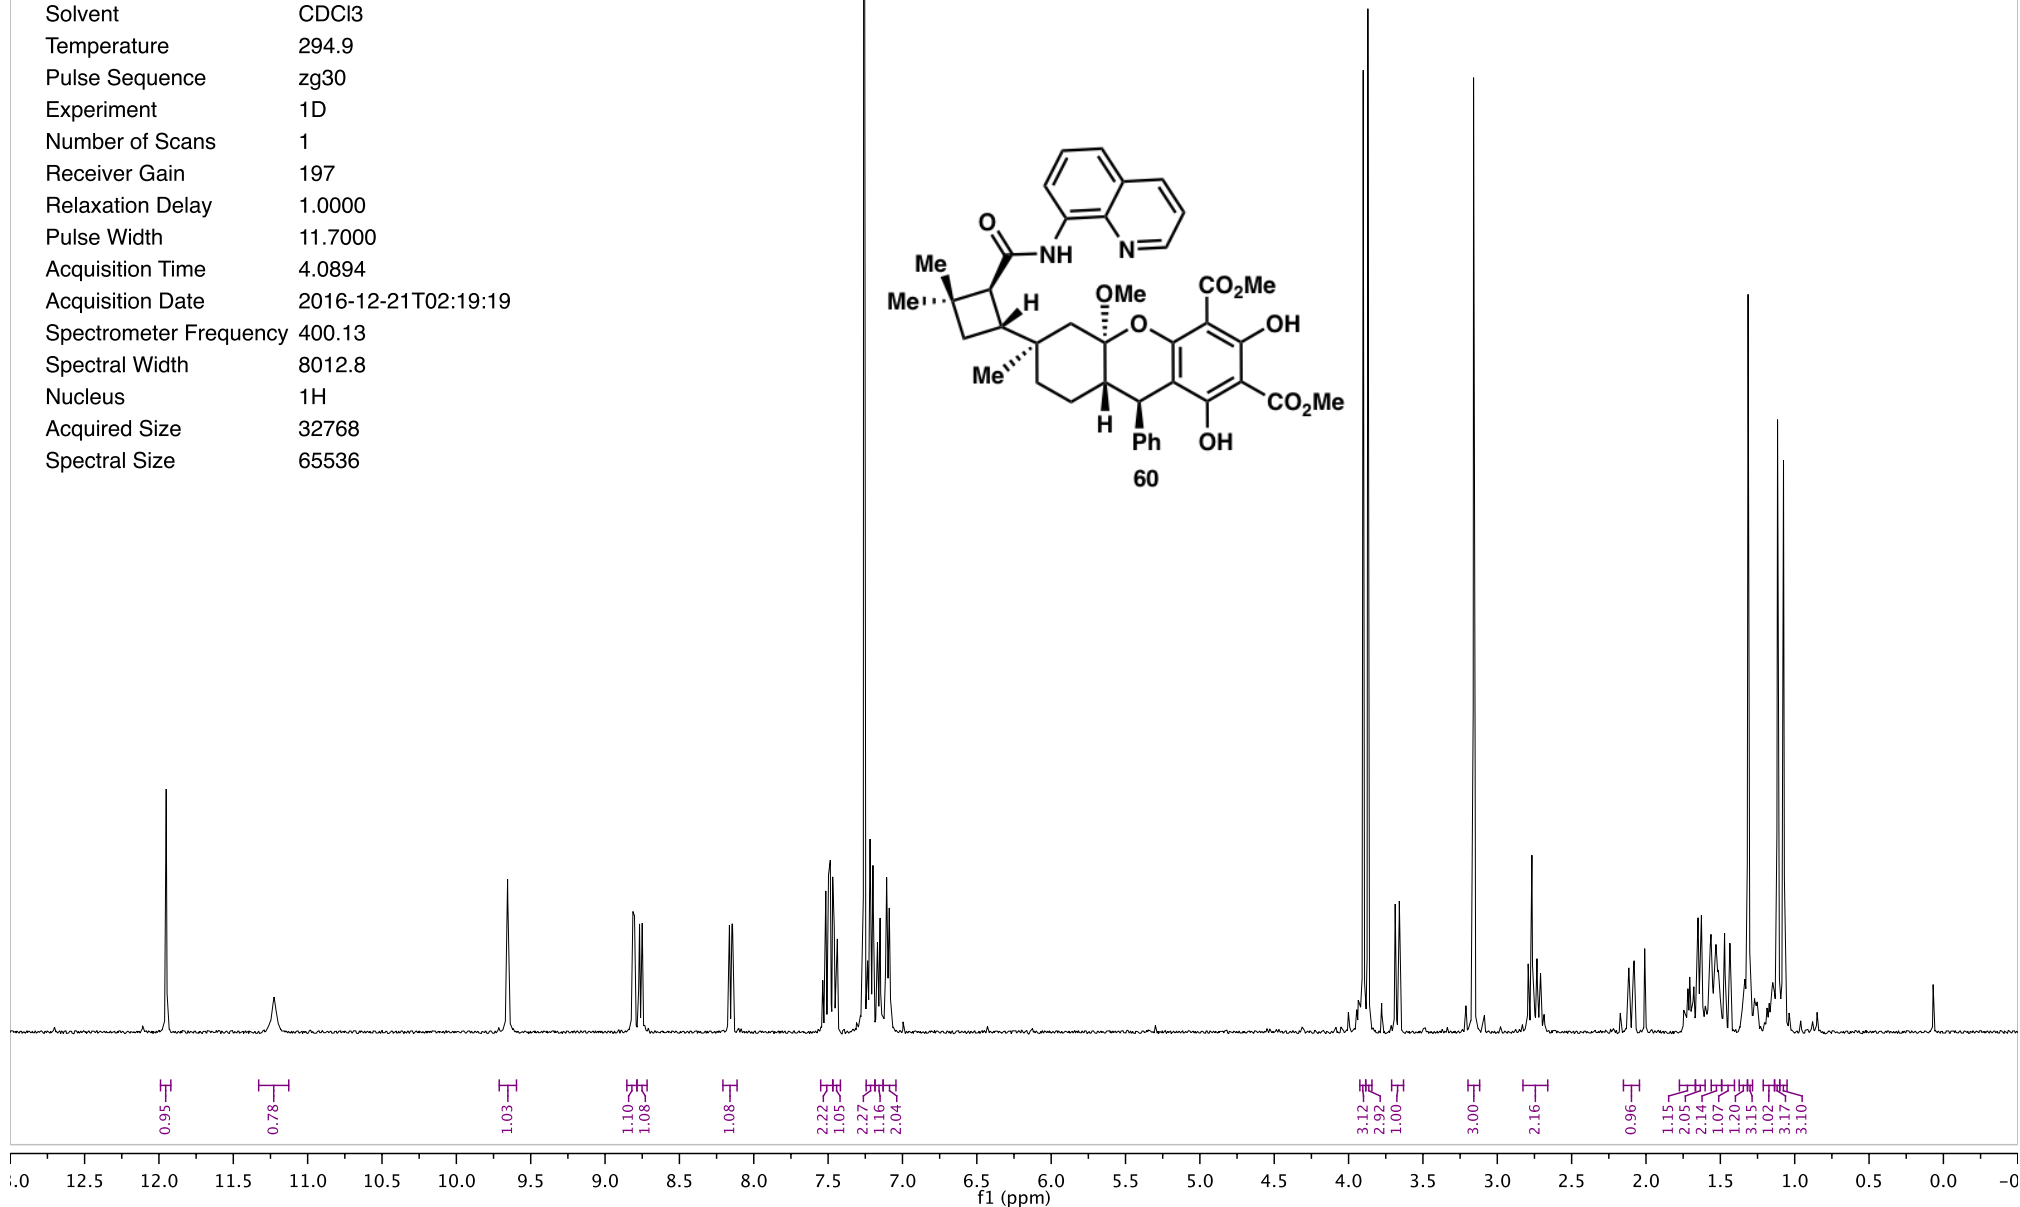



Parameter

Data File Name / Volumes/ nmrdata/ lchapman/ nmr/ LMC-04-253-HPLC-P4/ 3/ fid  
 Title LMC-04-253-HPLC-P4.3.fid  
 Origin Bruker BioSpin GmbH  
 Spectrometer spect  
 Solvent CDCl3  
 Temperature 294.9  
 Pulse Sequence zgpg30  
 Experiment 1D  
 Number of Scans 1024  
 Receiver Gain 72  
 Relaxation Delay 2.0000  
 Pulse Width 10.0000  
 Acquisition Time 1.3631  
 Acquisition Date 2016-12-21T03:35:03  
 Spectrometer Frequency 100.62  
 Spectral Width 24038.5  
 Nucleus 13C  
 Acquired Size 32768  
 Spectral Size 65536

Value  
 170.85  
 170.81  
 169.46  
 164.01  
 162.35  
 157.43  
 148.32  
 145.45  
 138.49  
 136.46  
 134.68  
 128.08  
 128.08  
 127.58  
 125.93  
 121.72  
 121.29  
 116.37  
 108.00  
 101.65  
 99.62  
 95.54

52.72  
 52.47  
 51.19  
 49.37  
 49.05  
 42.05  
 41.10  
 36.24  
 35.33  
 34.83  
 33.26  
 32.62  
 30.78  
 23.80  
 22.54  
 21.08

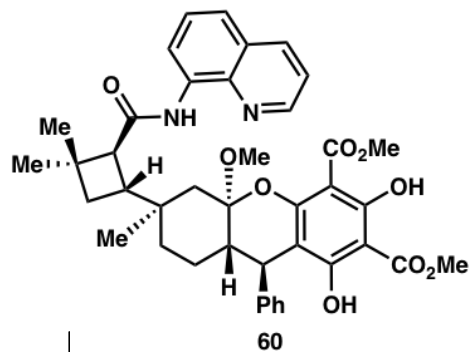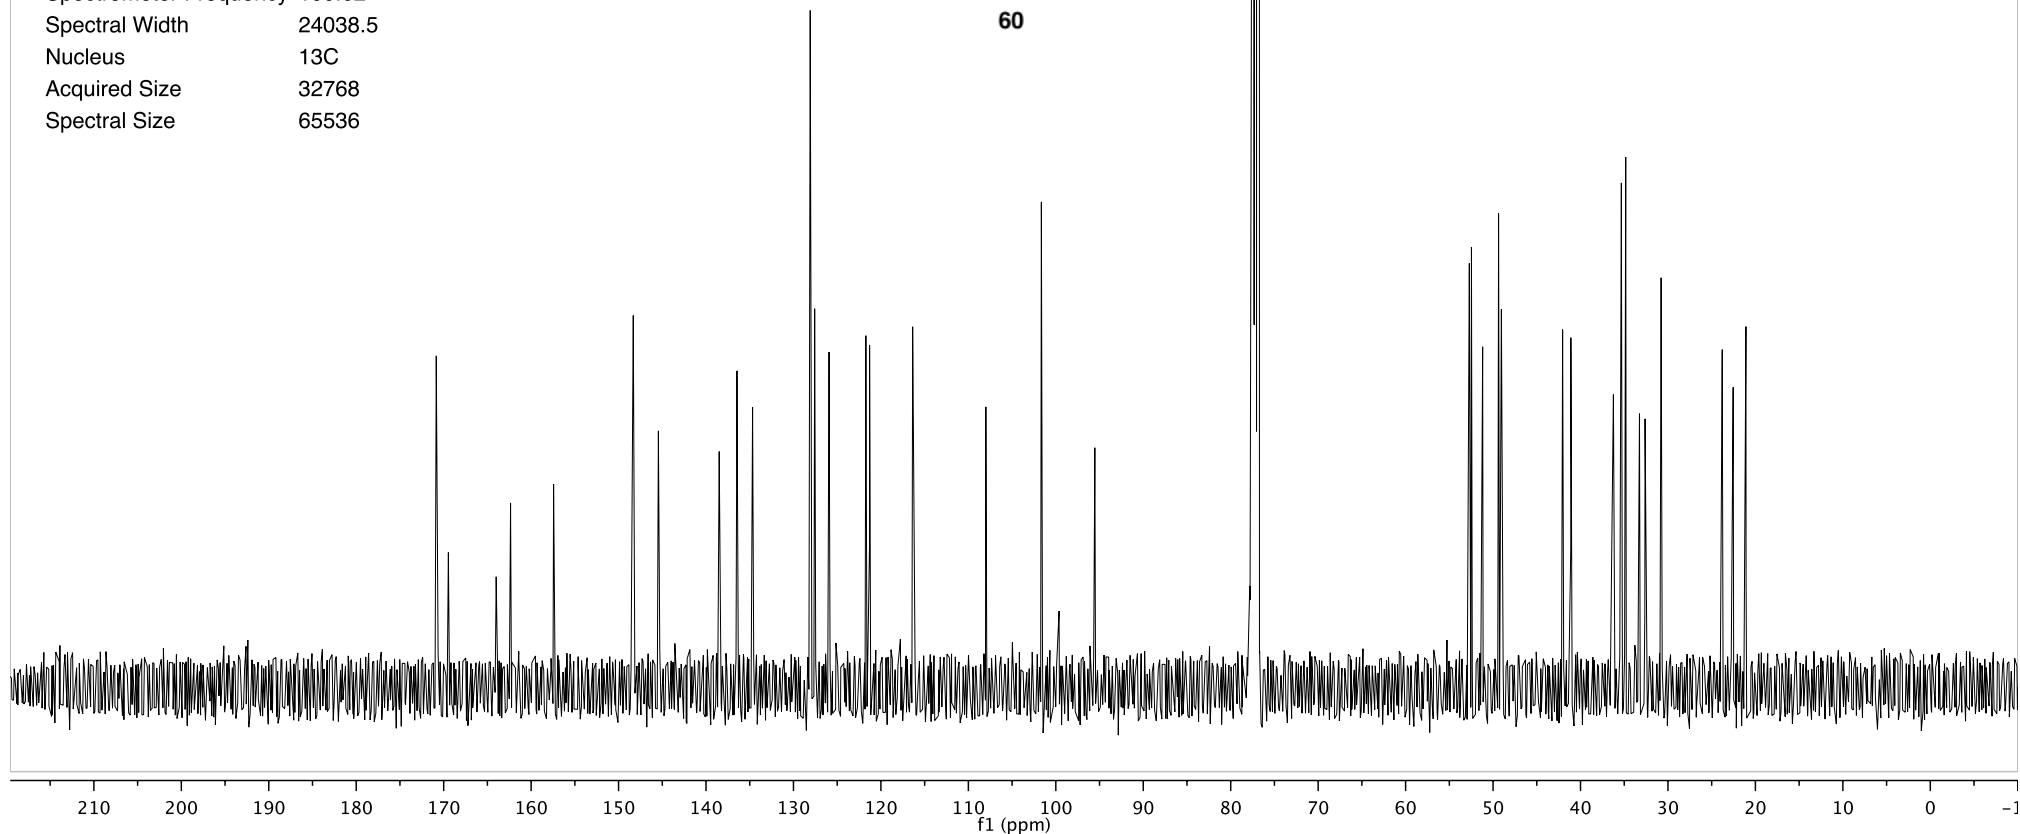

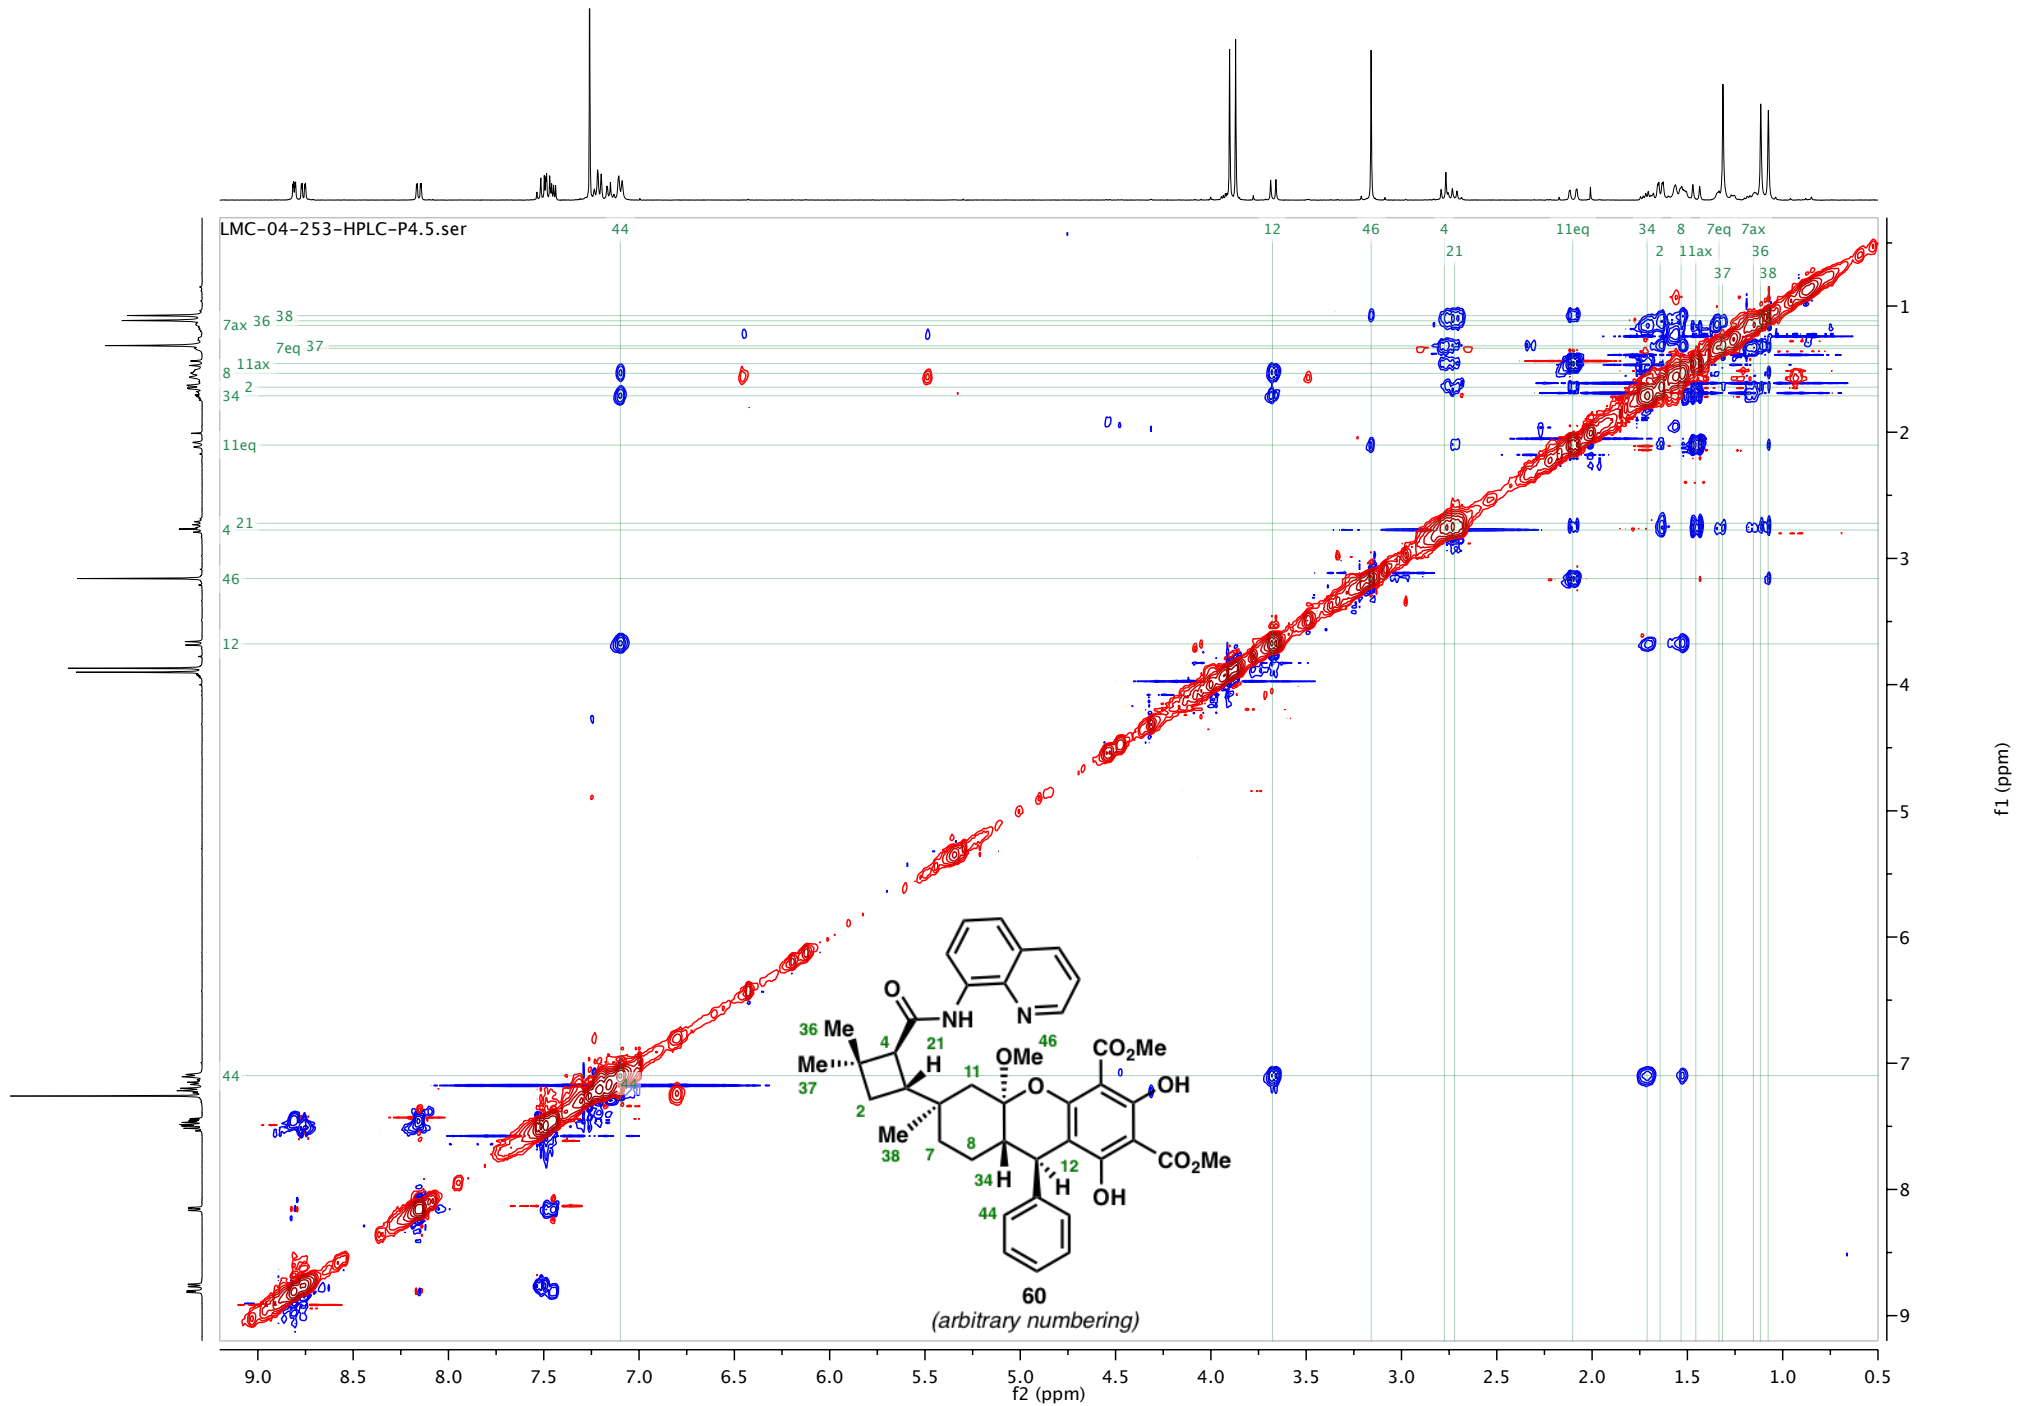

| Parameter              | Value                                                     |
|------------------------|-----------------------------------------------------------|
| Data File Name         | / Volumes/ nmrdata/ lchapman/ nmr/ LMC-04-244-CHO/ 1/ fid |
| Title                  | LMC-04-244-CHO.1.fid                                      |
| Origin                 | Bruker BioSpin GmbH                                       |
| Spectrometer           | spect                                                     |
| Solvent                | CDCl3                                                     |
| Temperature            | 294.9                                                     |
| Pulse Sequence         | zg30                                                      |
| Experiment             | 1D                                                        |
| Number of Scans        | 1                                                         |
| Receiver Gain          | 30                                                        |
| Relaxation Delay       | 1.0000                                                    |
| Pulse Width            | 11.7000                                                   |
| Acquisition Time       | 4.0894                                                    |
| Acquisition Date       | 2016-12-01T13:44:14                                       |
| Spectrometer Frequency | 400.13                                                    |
| Spectral Width         | 8012.8                                                    |
| Nucleus                | 1H                                                        |
| Acquired Size          | 32768                                                     |
| Spectral Size          | 65536                                                     |

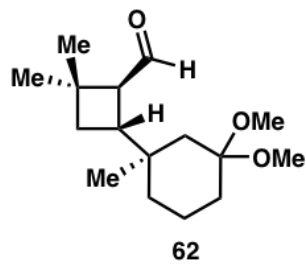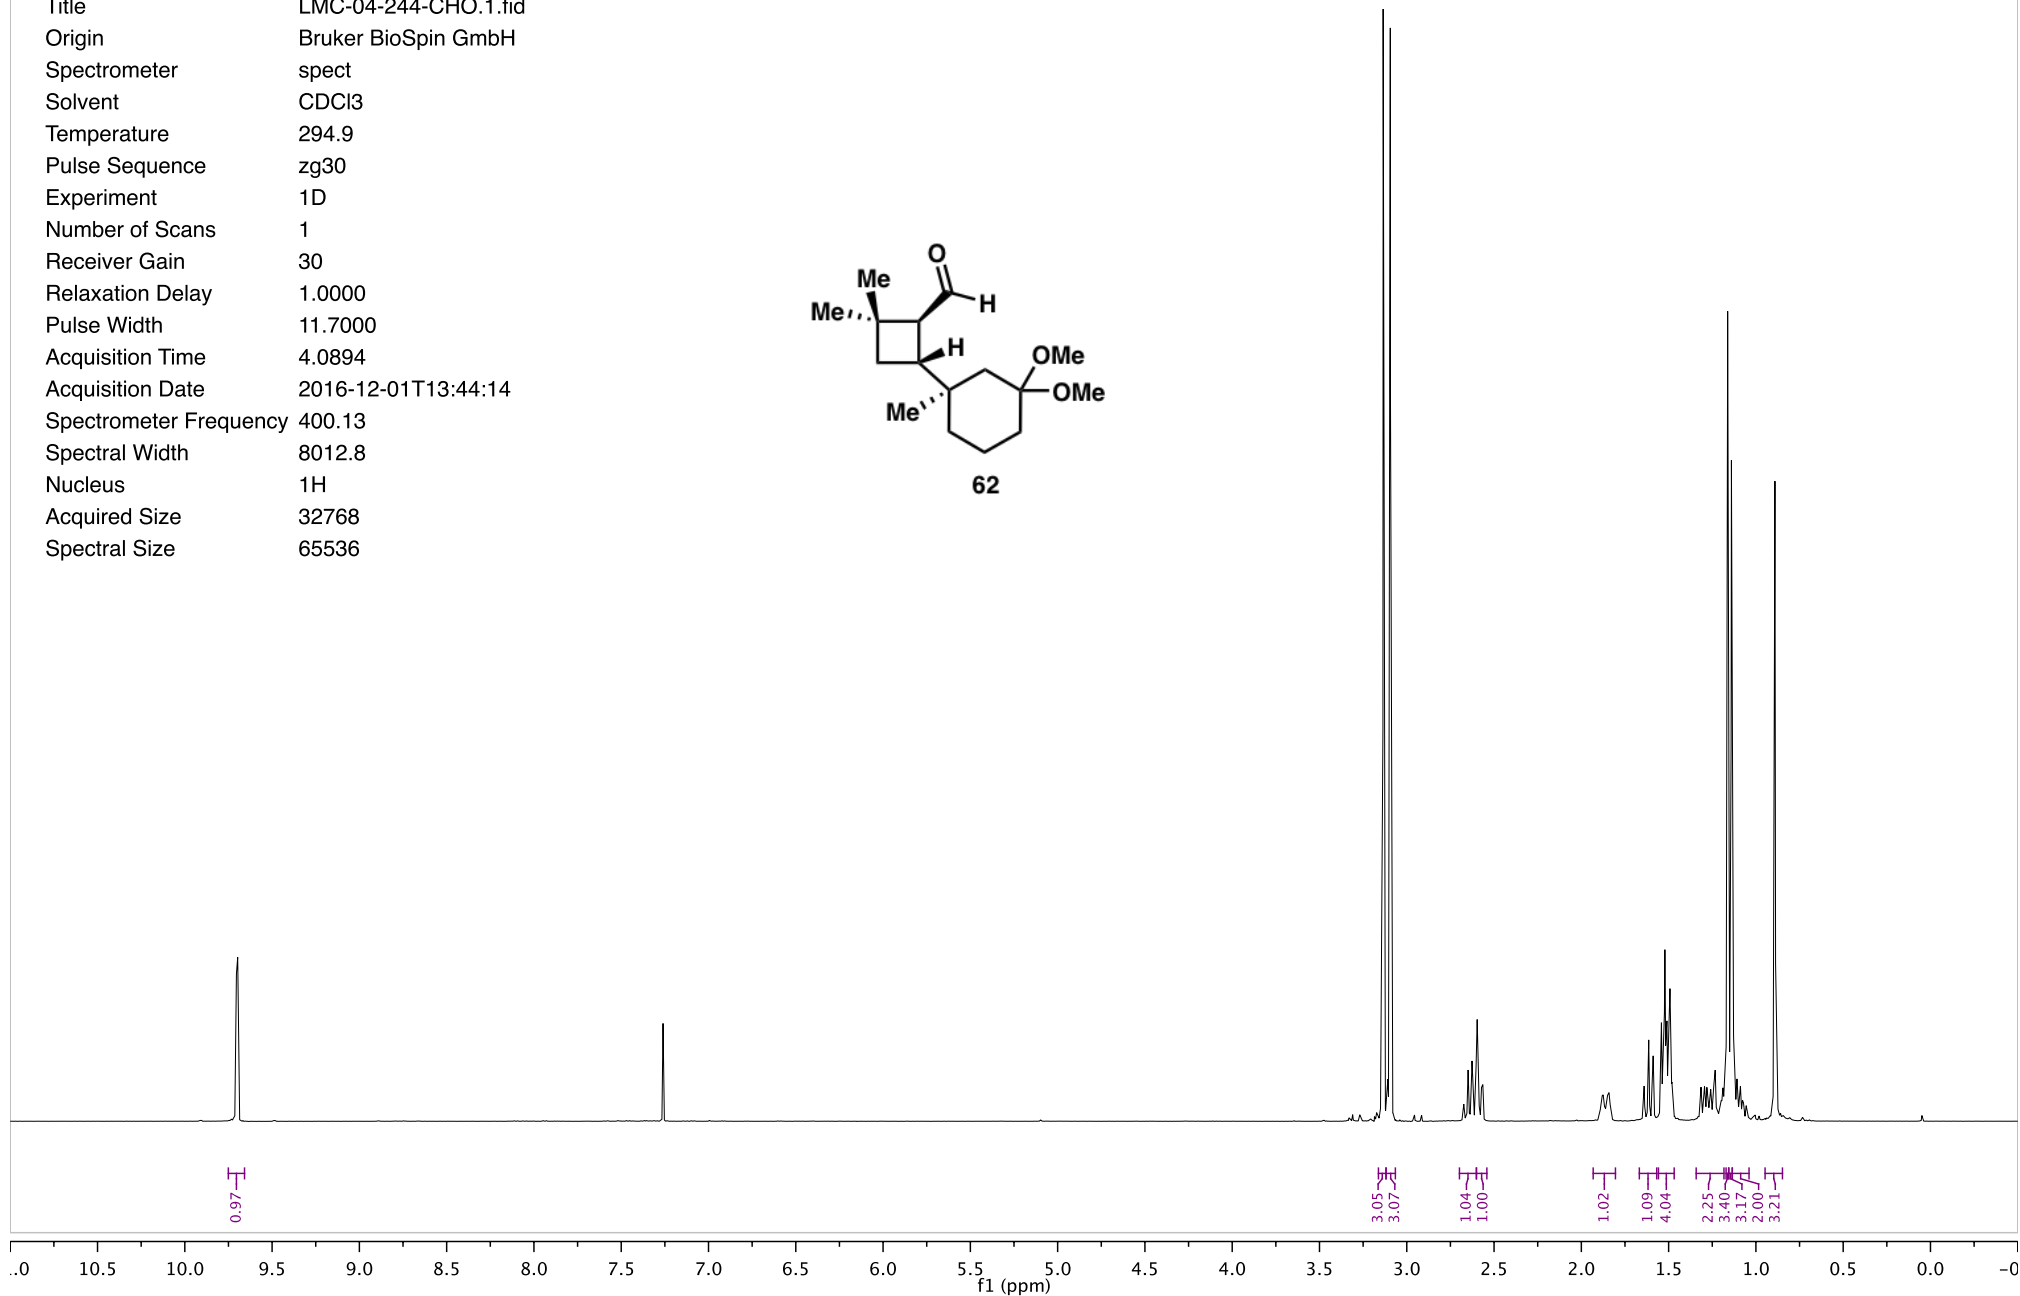

| Parameter              | Value                                                     |
|------------------------|-----------------------------------------------------------|
| Data File Name         | / Volumes/ nmrdata/ lchapman/ nmr/ LMC-04-244-CHO/ 2/ fid |
| Title                  | LMC-04-244-CHO.2.fid                                      |
| Origin                 | Bruker BioSpin GmbH                                       |
| Spectrometer           | spect                                                     |
| Solvent                | CDCl3                                                     |
| Temperature            | 295.0                                                     |
| Pulse Sequence         | zgpg30                                                    |
| Experiment             | 1D                                                        |
| Number of Scans        | 128                                                       |
| Receiver Gain          | 79                                                        |
| Relaxation Delay       | 2.0000                                                    |
| Pulse Width            | 10.0000                                                   |
| Acquisition Time       | 1.3631                                                    |
| Acquisition Date       | 2016-12-01T13:52:11                                       |
| Spectrometer Frequency | 100.62                                                    |
| Spectral Width         | 24038.5                                                   |
| Nucleus                | 13C                                                       |
| Acquired Size          | 32768                                                     |
| Spectral Size          | 65536                                                     |

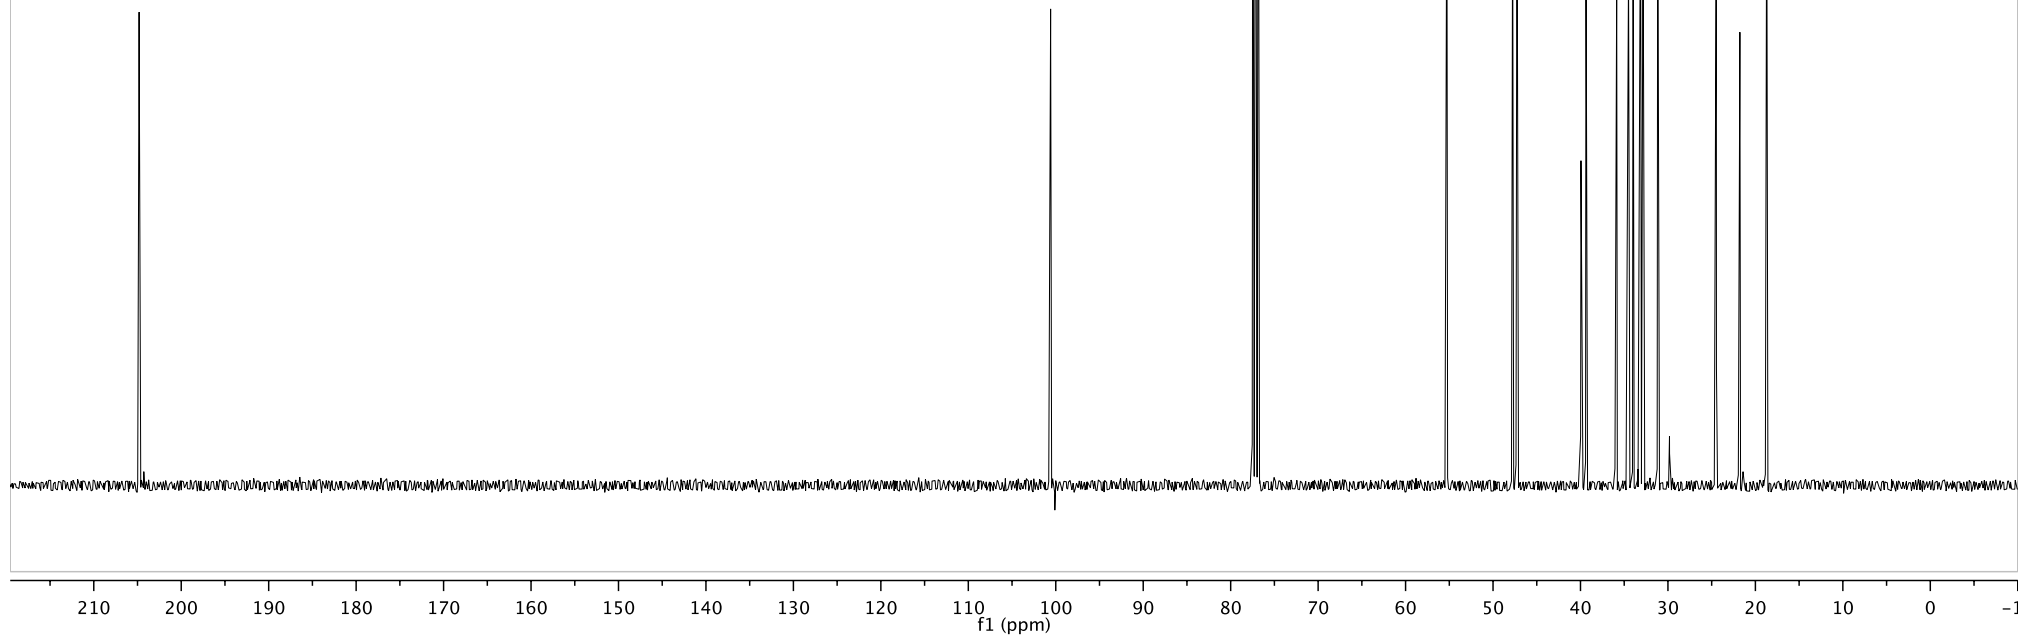

| Parameter              | Value                                                        |
|------------------------|--------------------------------------------------------------|
| Data File Name         | / Volumes/ nmrdata/ lchapman/ nmr/ LMC-04-245-alkyne/ 1/ fid |
| Title                  | LMC-04-245-alkyne.1.fid                                      |
| Comment                |                                                              |
| Origin                 | Bruker BioSpin GmbH                                          |
| Spectrometer           | spect                                                        |
| Solvent                | CDCl3                                                        |
| Temperature            | 294.9                                                        |
| Pulse Sequence         | zg30                                                         |
| Experiment             | 1D                                                           |
| Number of Scans        | 1                                                            |
| Receiver Gain          | 30                                                           |
| Relaxation Delay       | 1.0000                                                       |
| Pulse Width            | 11.7000                                                      |
| Acquisition Time       | 4.0894                                                       |
| Acquisition Date       | 2016-12-02T13:56:26                                          |
| Spectrometer Frequency | 400.13                                                       |
| Spectral Width         | 8012.8                                                       |
| Nucleus                | 1H                                                           |
| Acquired Size          | 32768                                                        |
| Spectral Size          | 65536                                                        |

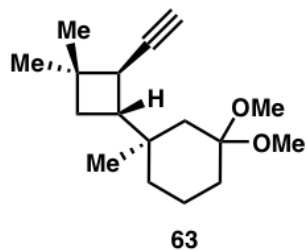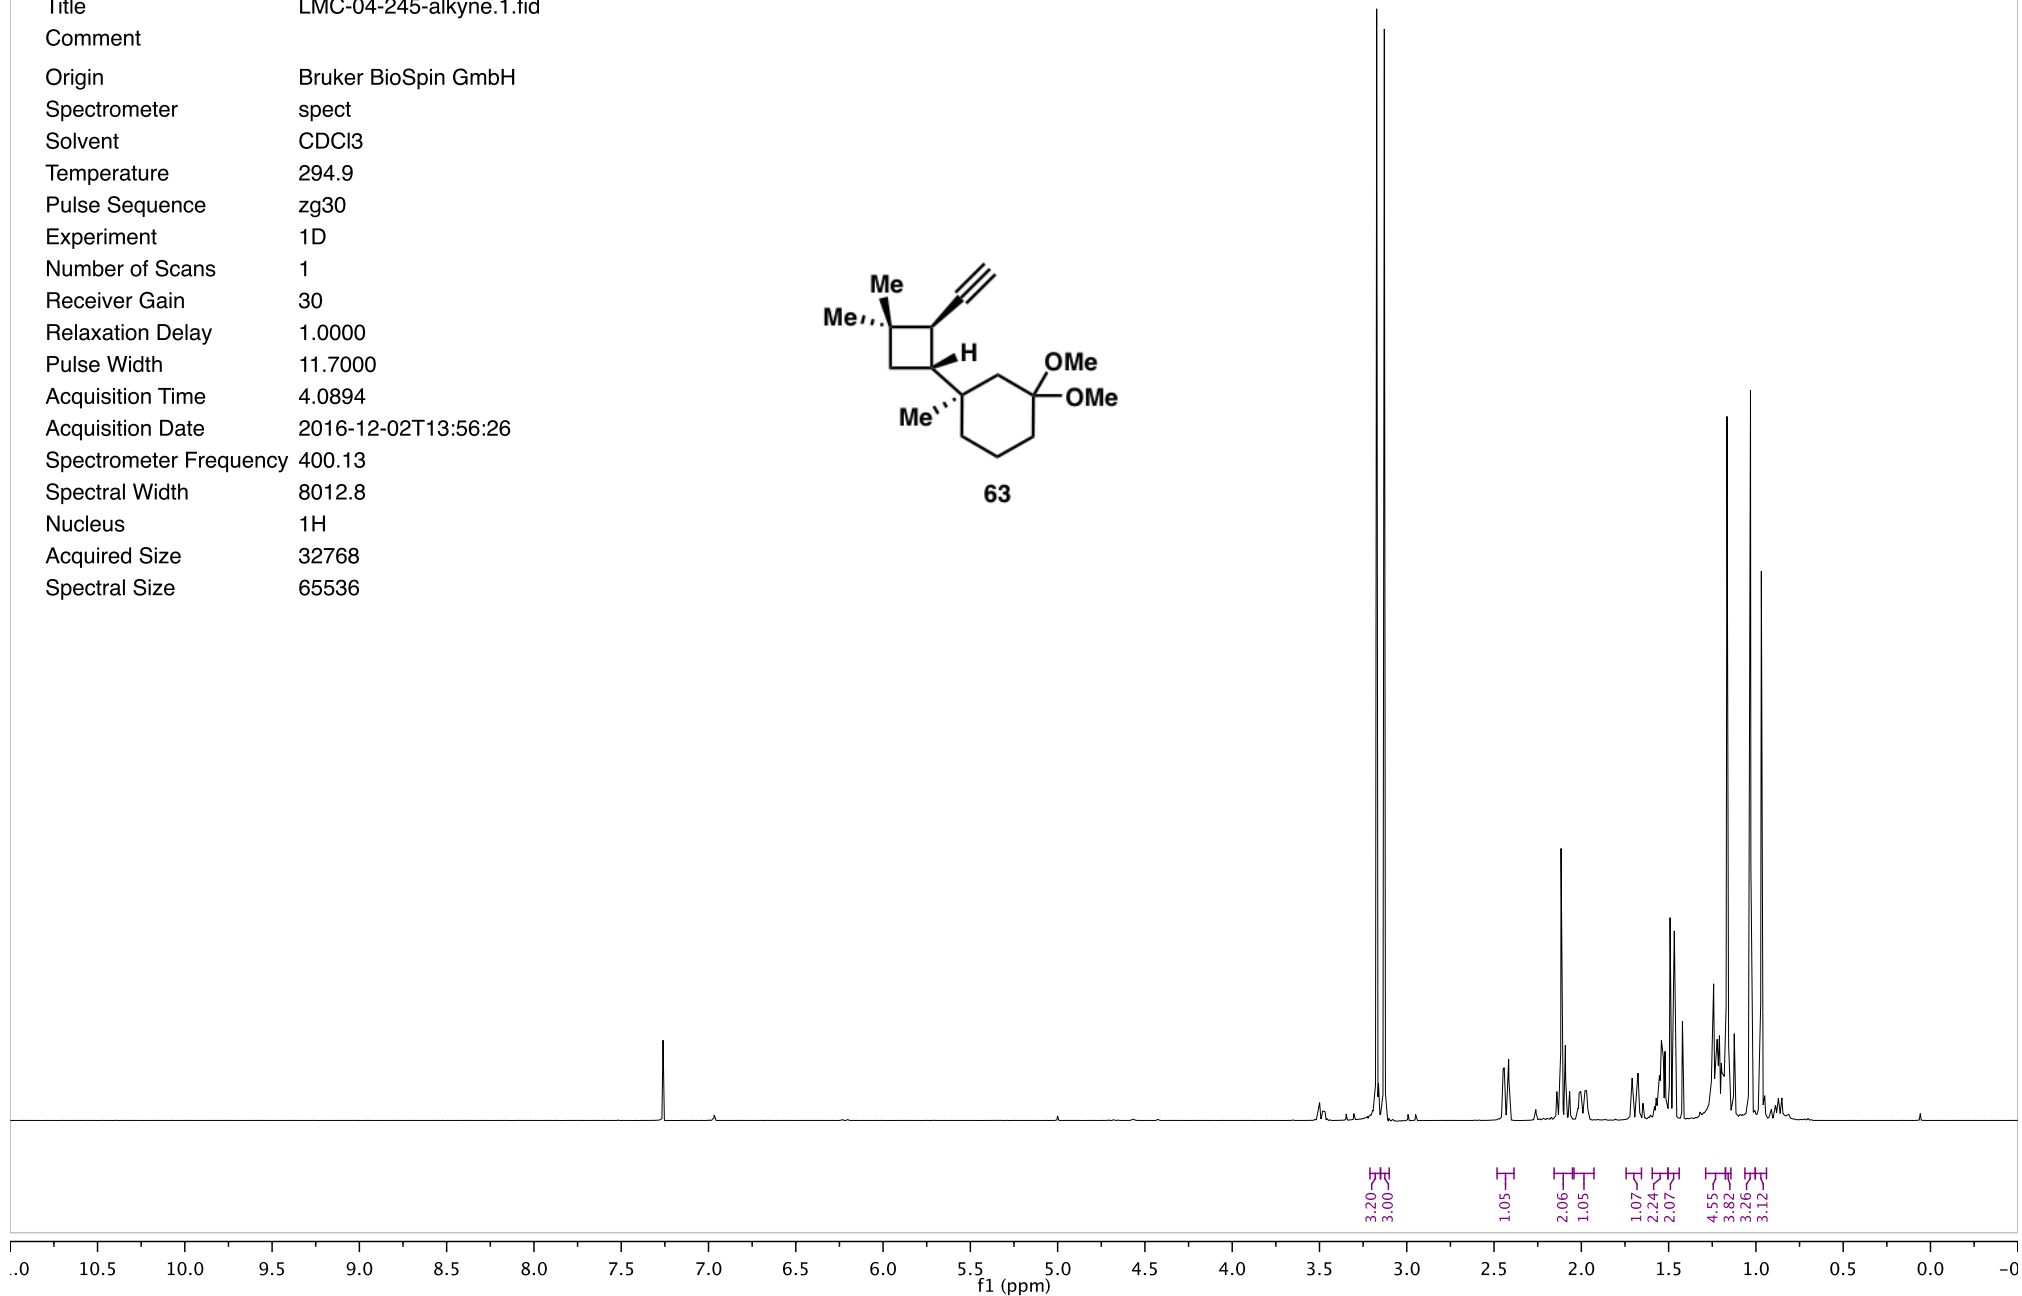

| Parameter              | Value                                                        |
|------------------------|--------------------------------------------------------------|
| Data File Name         | / Volumes/ nmrdata/ lchapman/ nmr/ LMC-04-245-alkyne/ 2/ fid |
| Title                  | LMC-04-245-alkyne.2.fid                                      |
| Comment                |                                                              |
| Origin                 | Bruker BioSpin GmbH                                          |
| Spectrometer           | spect                                                        |
| Solvent                | CDCl3                                                        |
| Temperature            | 294.9                                                        |
| Pulse Sequence         | zgpg30                                                       |
| Experiment             | 1D                                                           |
| Number of Scans        | 128                                                          |
| Receiver Gain          | 64                                                           |
| Relaxation Delay       | 2.0000                                                       |
| Pulse Width            | 10.0000                                                      |
| Acquisition Time       | 1.3631                                                       |
| Acquisition Date       | 2016-12-02T14:04:23                                          |
| Spectrometer Frequency | 100.62                                                       |
| Spectral Width         | 24038.5                                                      |
| Nucleus                | 13C                                                          |
| Acquired Size          | 32768                                                        |
| Spectral Size          | 65536                                                        |

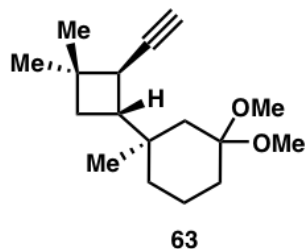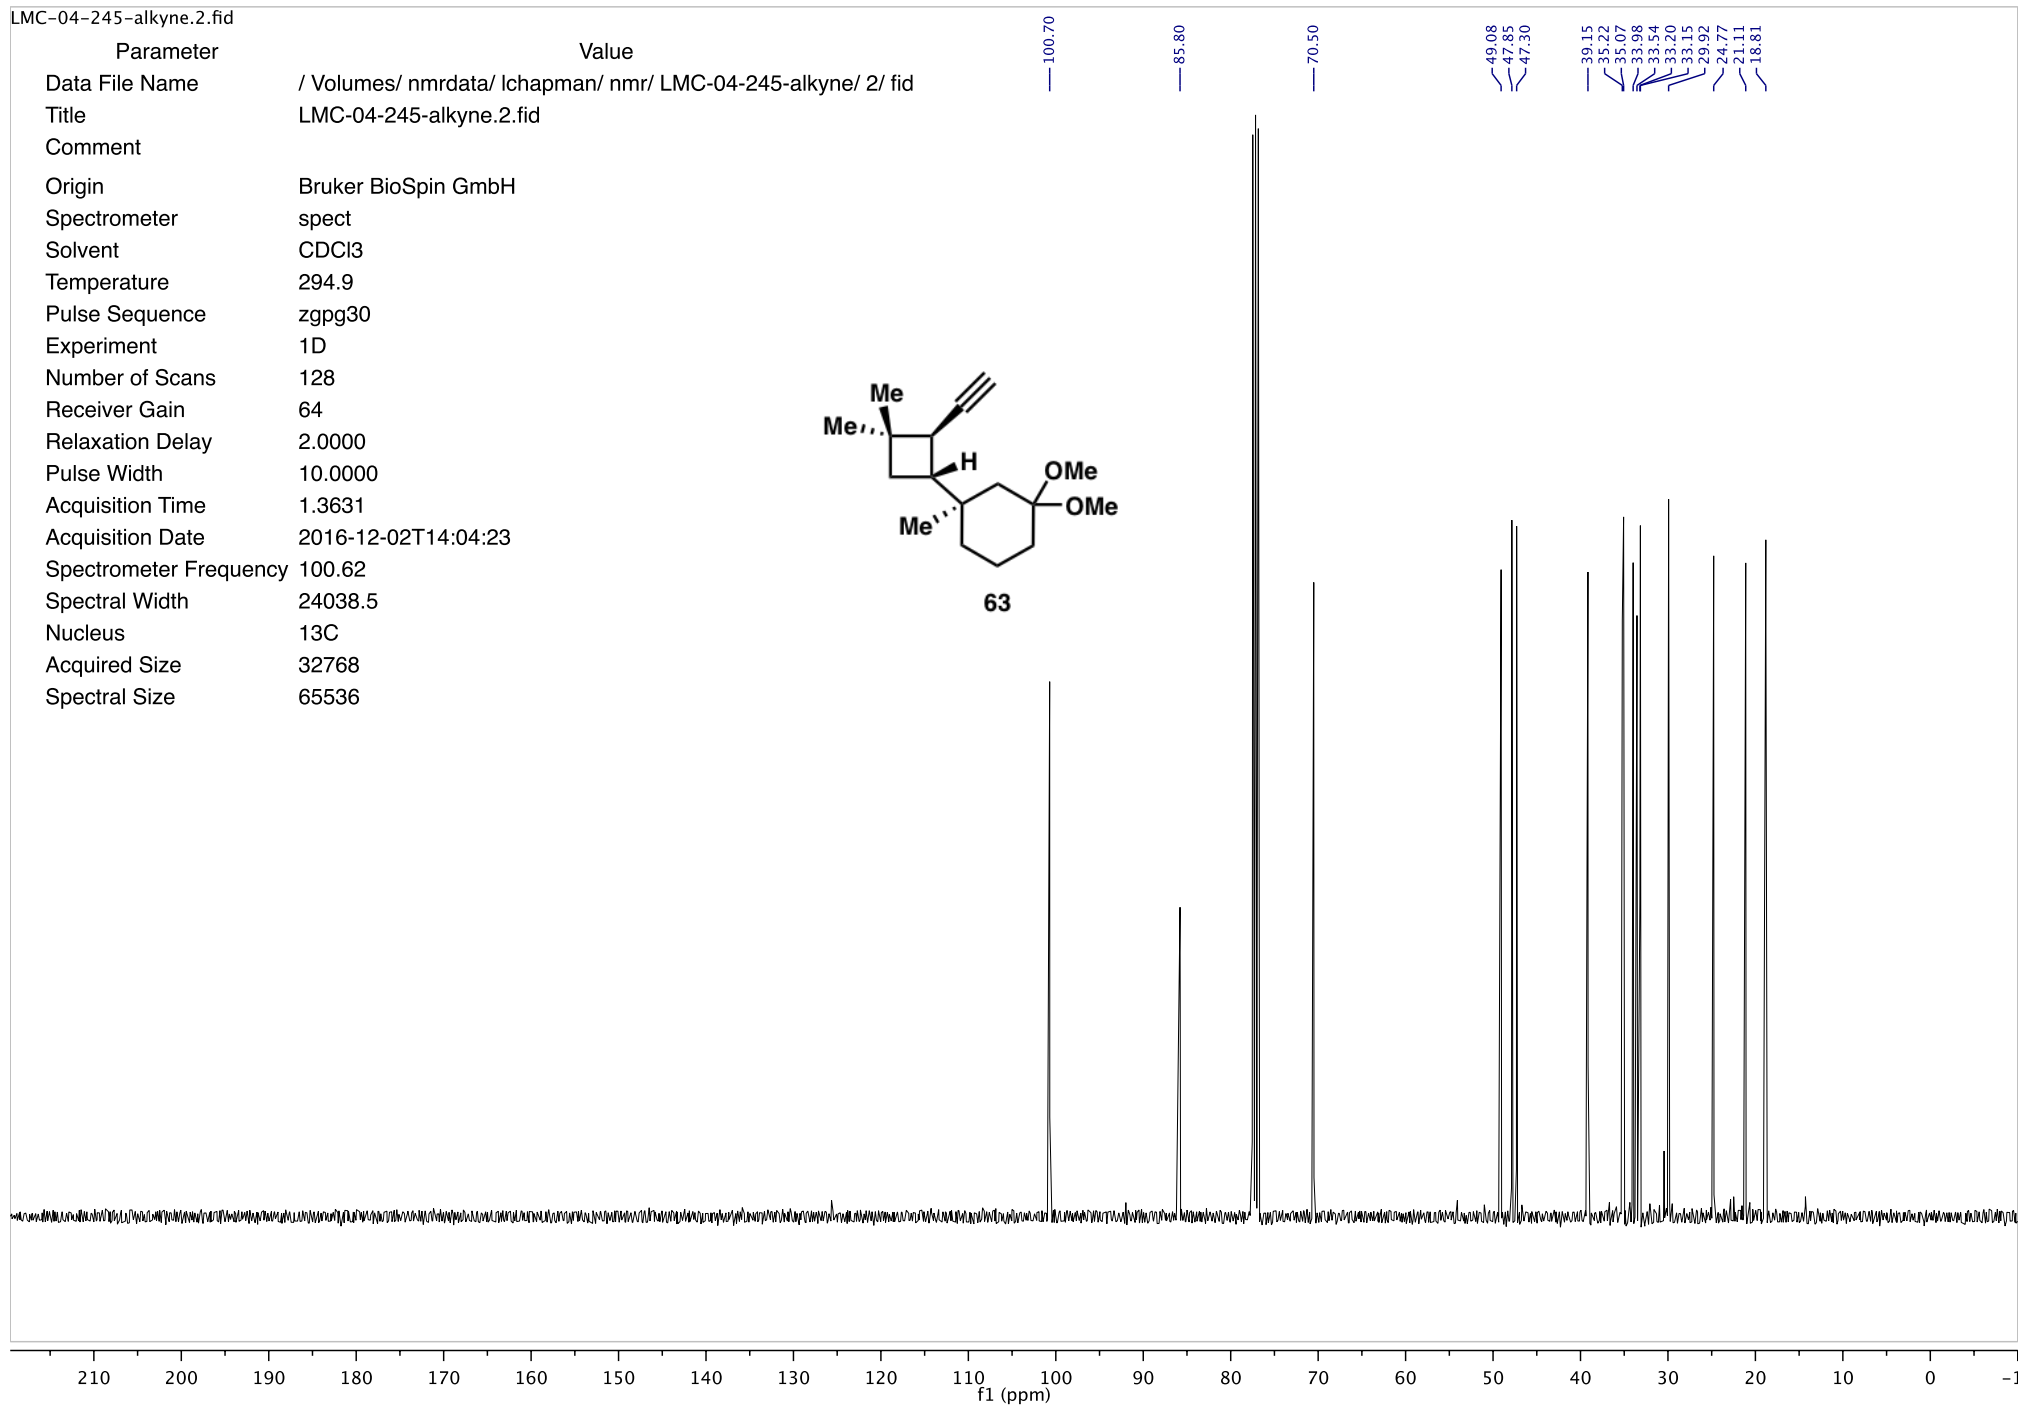

LMC-04-247-P2-ketal.2.fid

| Parameter              | Value                                                          |
|------------------------|----------------------------------------------------------------|
| Data File Name         | / Volumes/ nmrdata/ lchapman/ nmr/ LMC-04-247-P2-ketal/ 2/ fid |
| Title                  | LMC-04-247-P2-ketal.2.fid                                      |
| Comment                |                                                                |
| Origin                 | Bruker BioSpin GmbH                                            |
| Spectrometer           | spect                                                          |
| Solvent                | CDCl3                                                          |
| Temperature            | 294.9                                                          |
| Pulse Sequence         | zg30                                                           |
| Experiment             | 1D                                                             |
| Number of Scans        | 16                                                             |
| Receiver Gain          | 197                                                            |
| Relaxation Delay       | 10.0000                                                        |
| Pulse Width            | 11.7000                                                        |
| Acquisition Time       | 4.0894                                                         |
| Acquisition Date       | 2016-12-05T17:38:01                                            |
| Spectrometer Frequency | 400.13                                                         |
| Spectral Width         | 8012.8                                                         |
| Nucleus                | 1H                                                             |
| Acquired Size          | 32768                                                          |
| Spectral Size          | 65536                                                          |

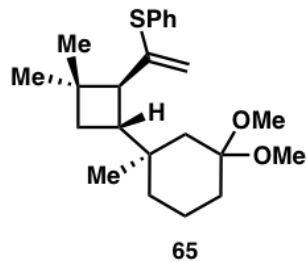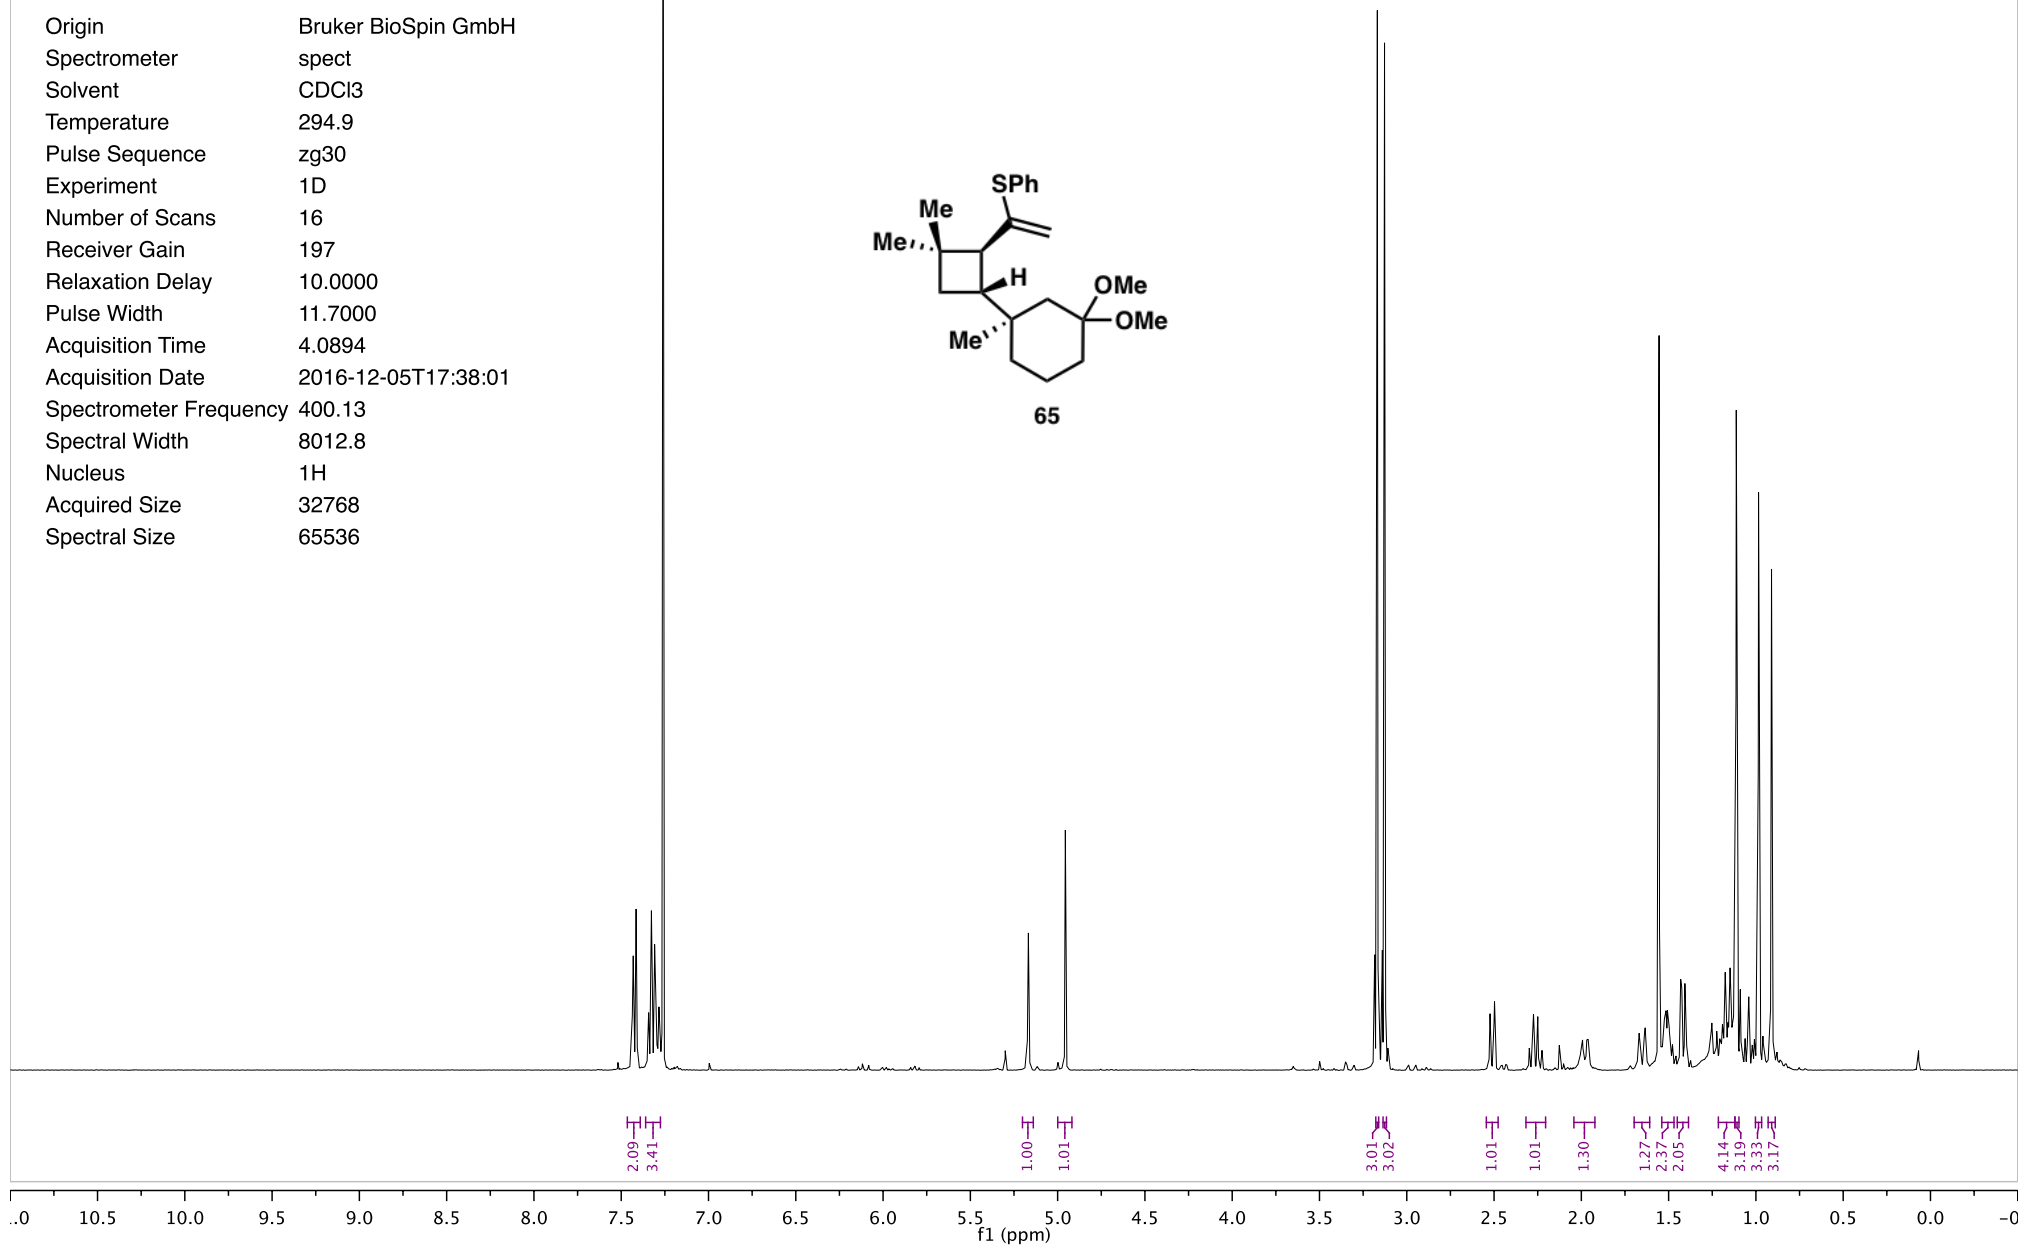

| Parameter              | Value                                                          |
|------------------------|----------------------------------------------------------------|
| Data File Name         | / Volumes/ nmrdata/ lchapman/ nmr/ LMC-04-247-P2-ketal/ 4/ fid |
| Title                  | LMC-04-247-P2-ketal.4.fid                                      |
| Comment                |                                                                |
| Origin                 | Bruker BioSpin GmbH                                            |
| Spectrometer           | spect                                                          |
| Solvent                | CDCl3                                                          |
| Temperature            | 295.0                                                          |
| Pulse Sequence         | zgpg30                                                         |
| Experiment             | 1D                                                             |
| Number of Scans        | 3072                                                           |
| Receiver Gain          | 72                                                             |
| Relaxation Delay       | 2.0000                                                         |
| Pulse Width            | 10.0000                                                        |
| Acquisition Time       | 1.3631                                                         |
| Acquisition Date       | 2016-12-06T00:56:39                                            |
| Spectrometer Frequency | 100.62                                                         |
| Spectral Width         | 24038.5                                                        |
| Nucleus                | 13C                                                            |
| Acquired Size          | 32768                                                          |
| Spectral Size          | 65536                                                          |

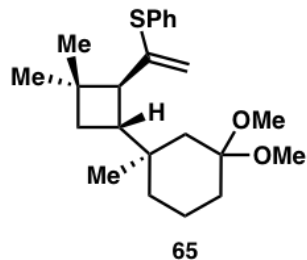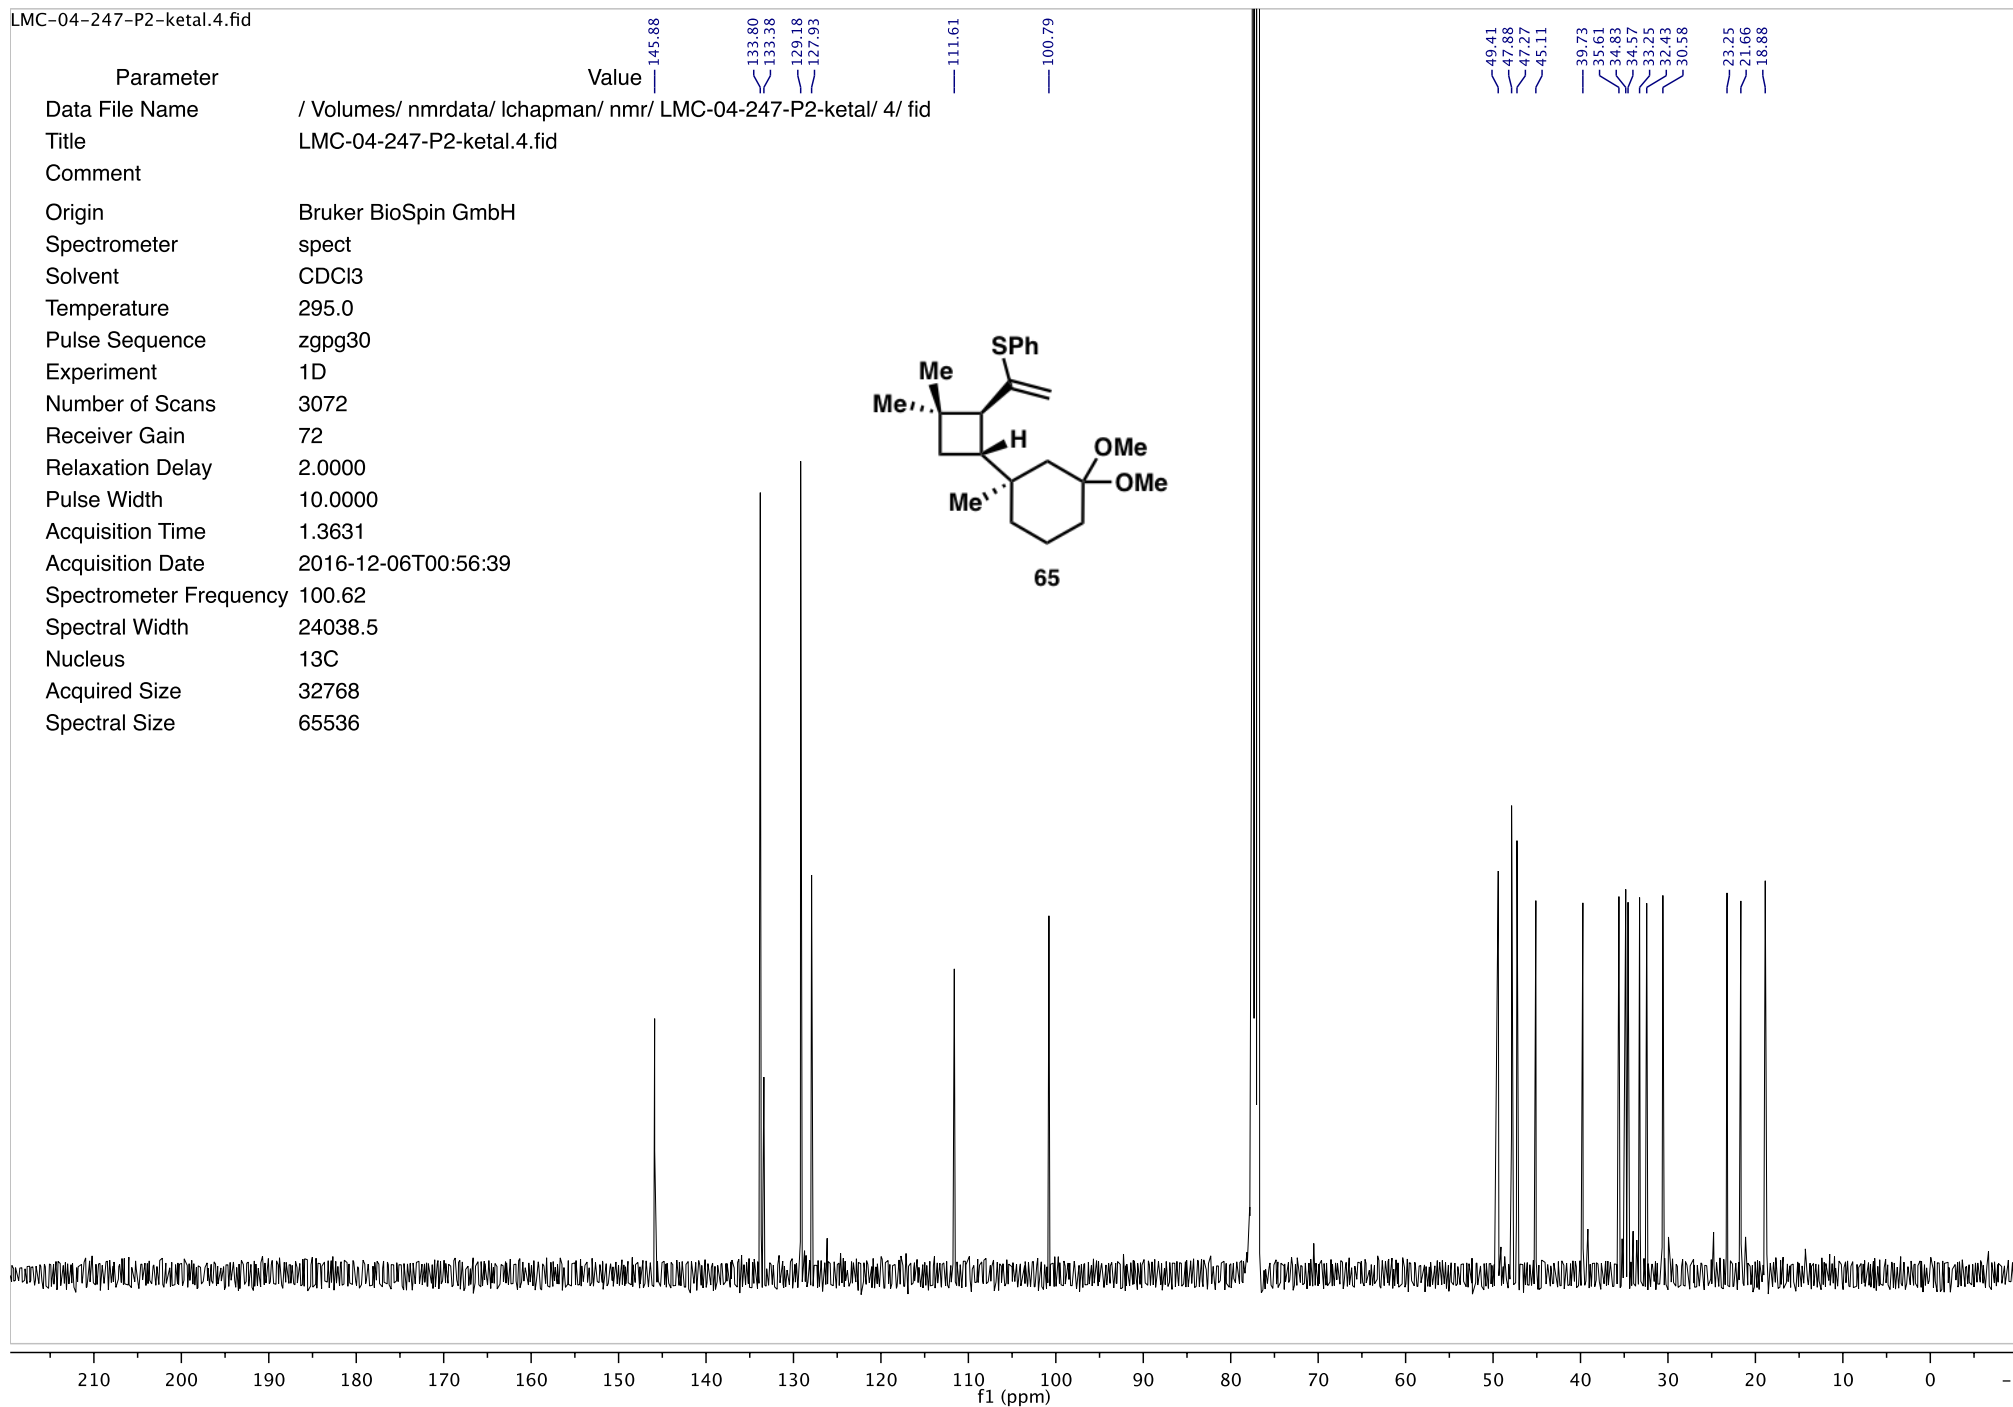



| Parameter              | Value                                                           |
|------------------------|-----------------------------------------------------------------|
| Data File Name         | / Volumes/ nmrdata/ lchapman/ nmr/ LMC-04-247-P1-carbon/ 1/ fid |
| Title                  | LMC-04-247-P1-carbon.1.fid                                      |
| Comment                |                                                                 |
| Origin                 | Bruker BioSpin GmbH                                             |
| Spectrometer           | spect                                                           |
| Solvent                | CDCl3                                                           |
| Temperature            | 294.9                                                           |
| Pulse Sequence         | zg30                                                            |
| Experiment             | 1D                                                              |
| Number of Scans        | 1                                                               |
| Receiver Gain          | 156                                                             |
| Relaxation Delay       | 1.0000                                                          |
| Pulse Width            | 11.7000                                                         |
| Acquisition Time       | 4.0894                                                          |
| Acquisition Date       | 2017-04-29T14:05:18                                             |
| Spectrometer Frequency | 400.13                                                          |
| Spectral Width         | 8012.8                                                          |
| Nucleus                | 1H                                                              |
| Acquired Size          | 32768                                                           |
| Spectral Size          | 65536                                                           |

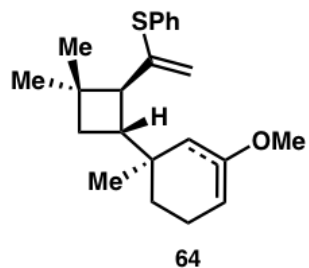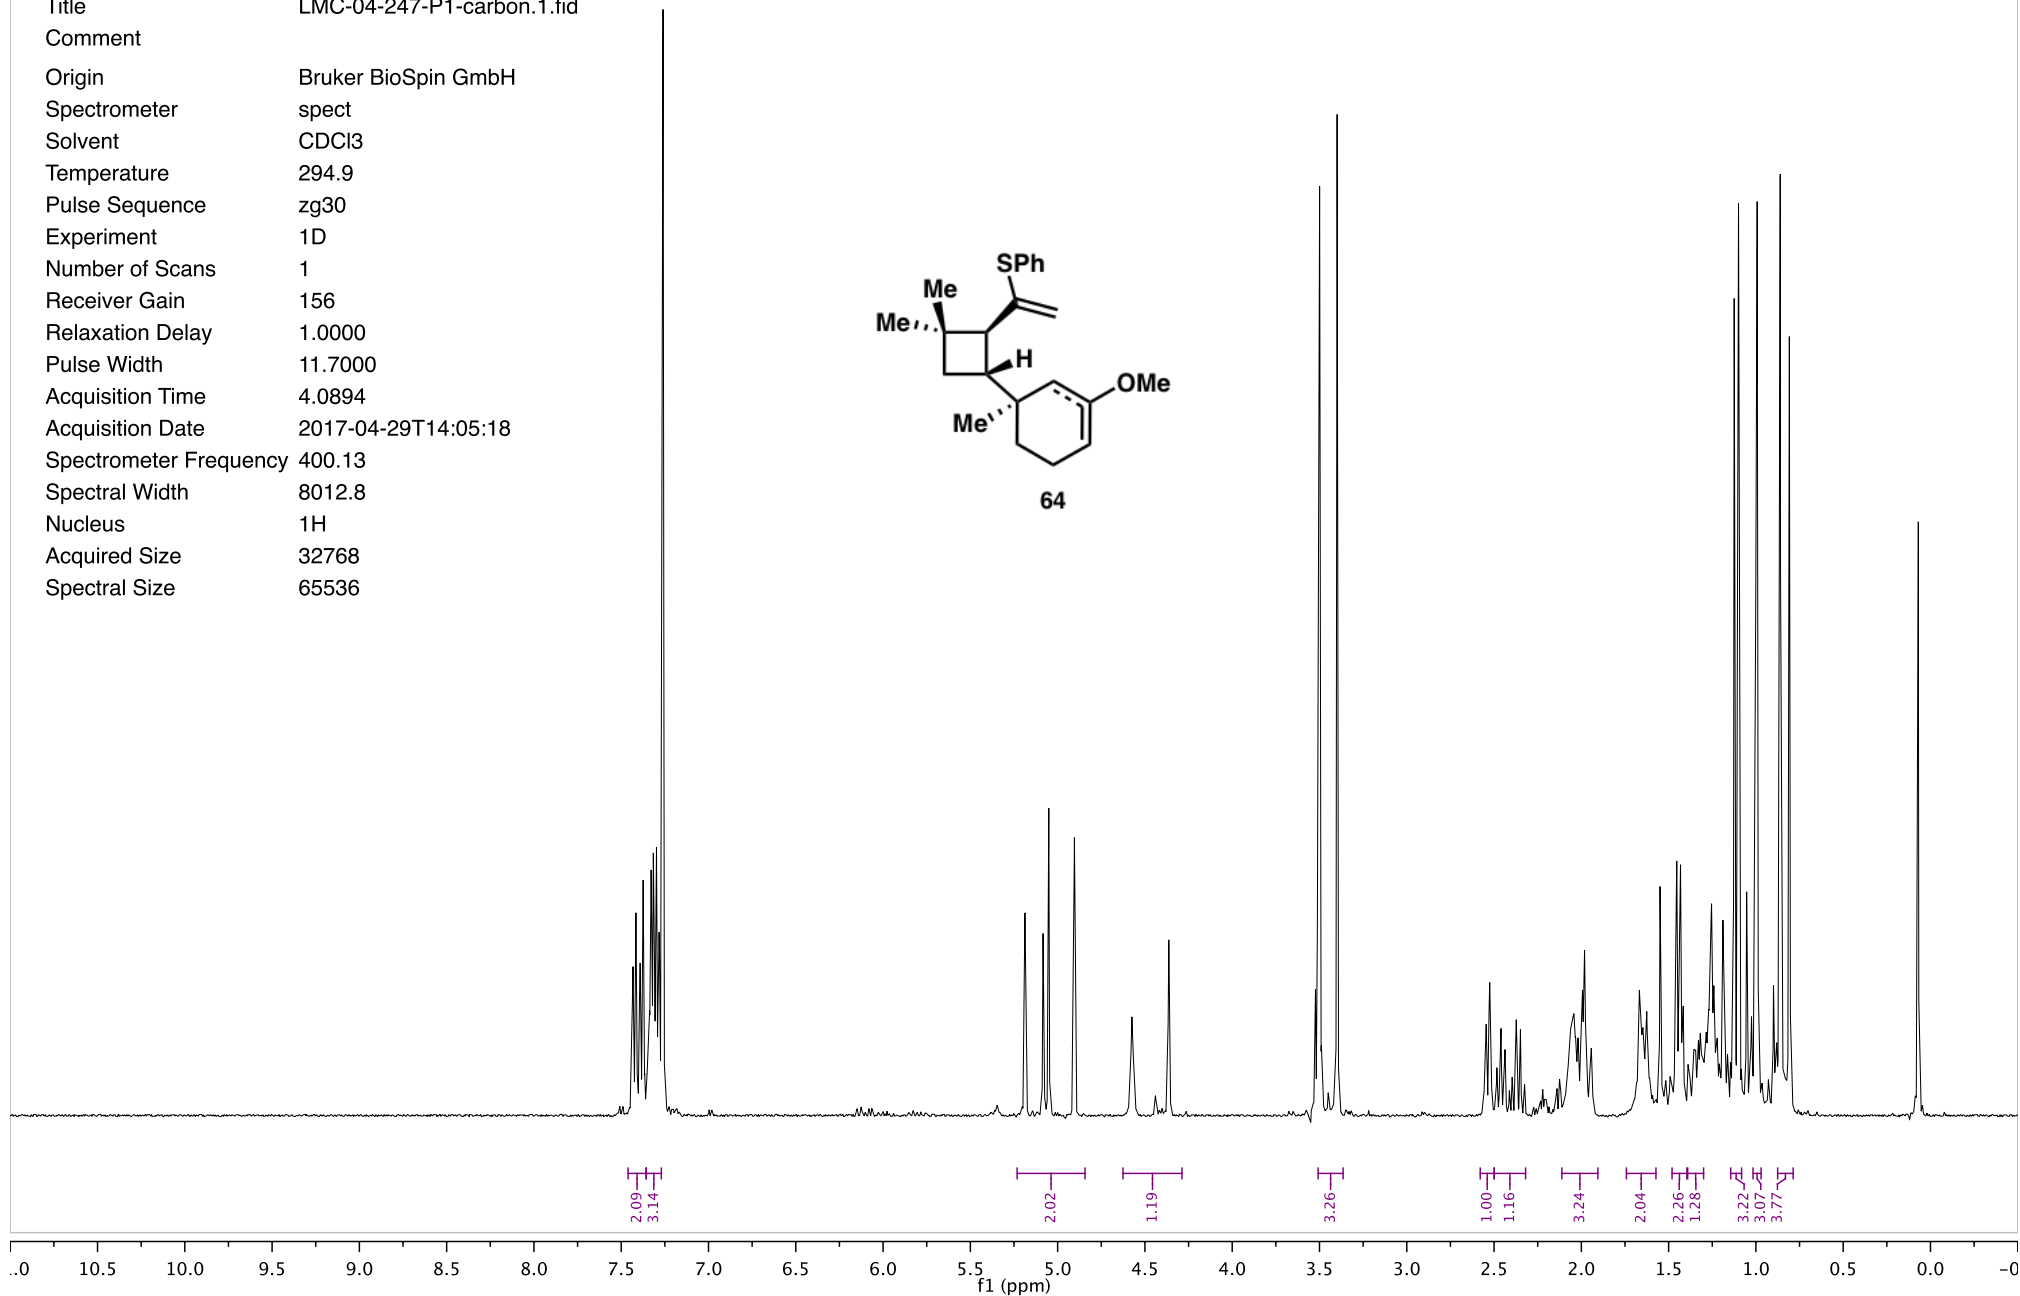

| Parameter              | Value                                                           |
|------------------------|-----------------------------------------------------------------|
| Data File Name         | / Volumes/ nmrdata/ lchapman/ nmr/ LMC-04-247-P1-carbon/ 2/ fid |
| Title                  | LMC-04-247-P1-carbon.2.fid                                      |
| Comment                |                                                                 |
| Origin                 | Bruker BioSpin GmbH                                             |
| Spectrometer           | spect                                                           |
| Solvent                | CDCl3                                                           |
| Temperature            | 295.0                                                           |
| Pulse Sequence         | zgpg30                                                          |
| Experiment             | 1D                                                              |
| Number of Scans        | 1024                                                            |
| Receiver Gain          | 79                                                              |
| Relaxation Delay       | 2.0000                                                          |
| Pulse Width            | 10.0000                                                         |
| Acquisition Time       | 1.3631                                                          |
| Acquisition Date       | 2017-04-29T15:04:26                                             |
| Spectrometer Frequency | 100.62                                                          |
| Spectral Width         | 24038.5                                                         |
| Nucleus                | 13C                                                             |
| Acquired Size          | 32768                                                           |
| Spectral Size          | 65536                                                           |

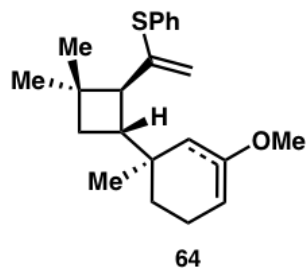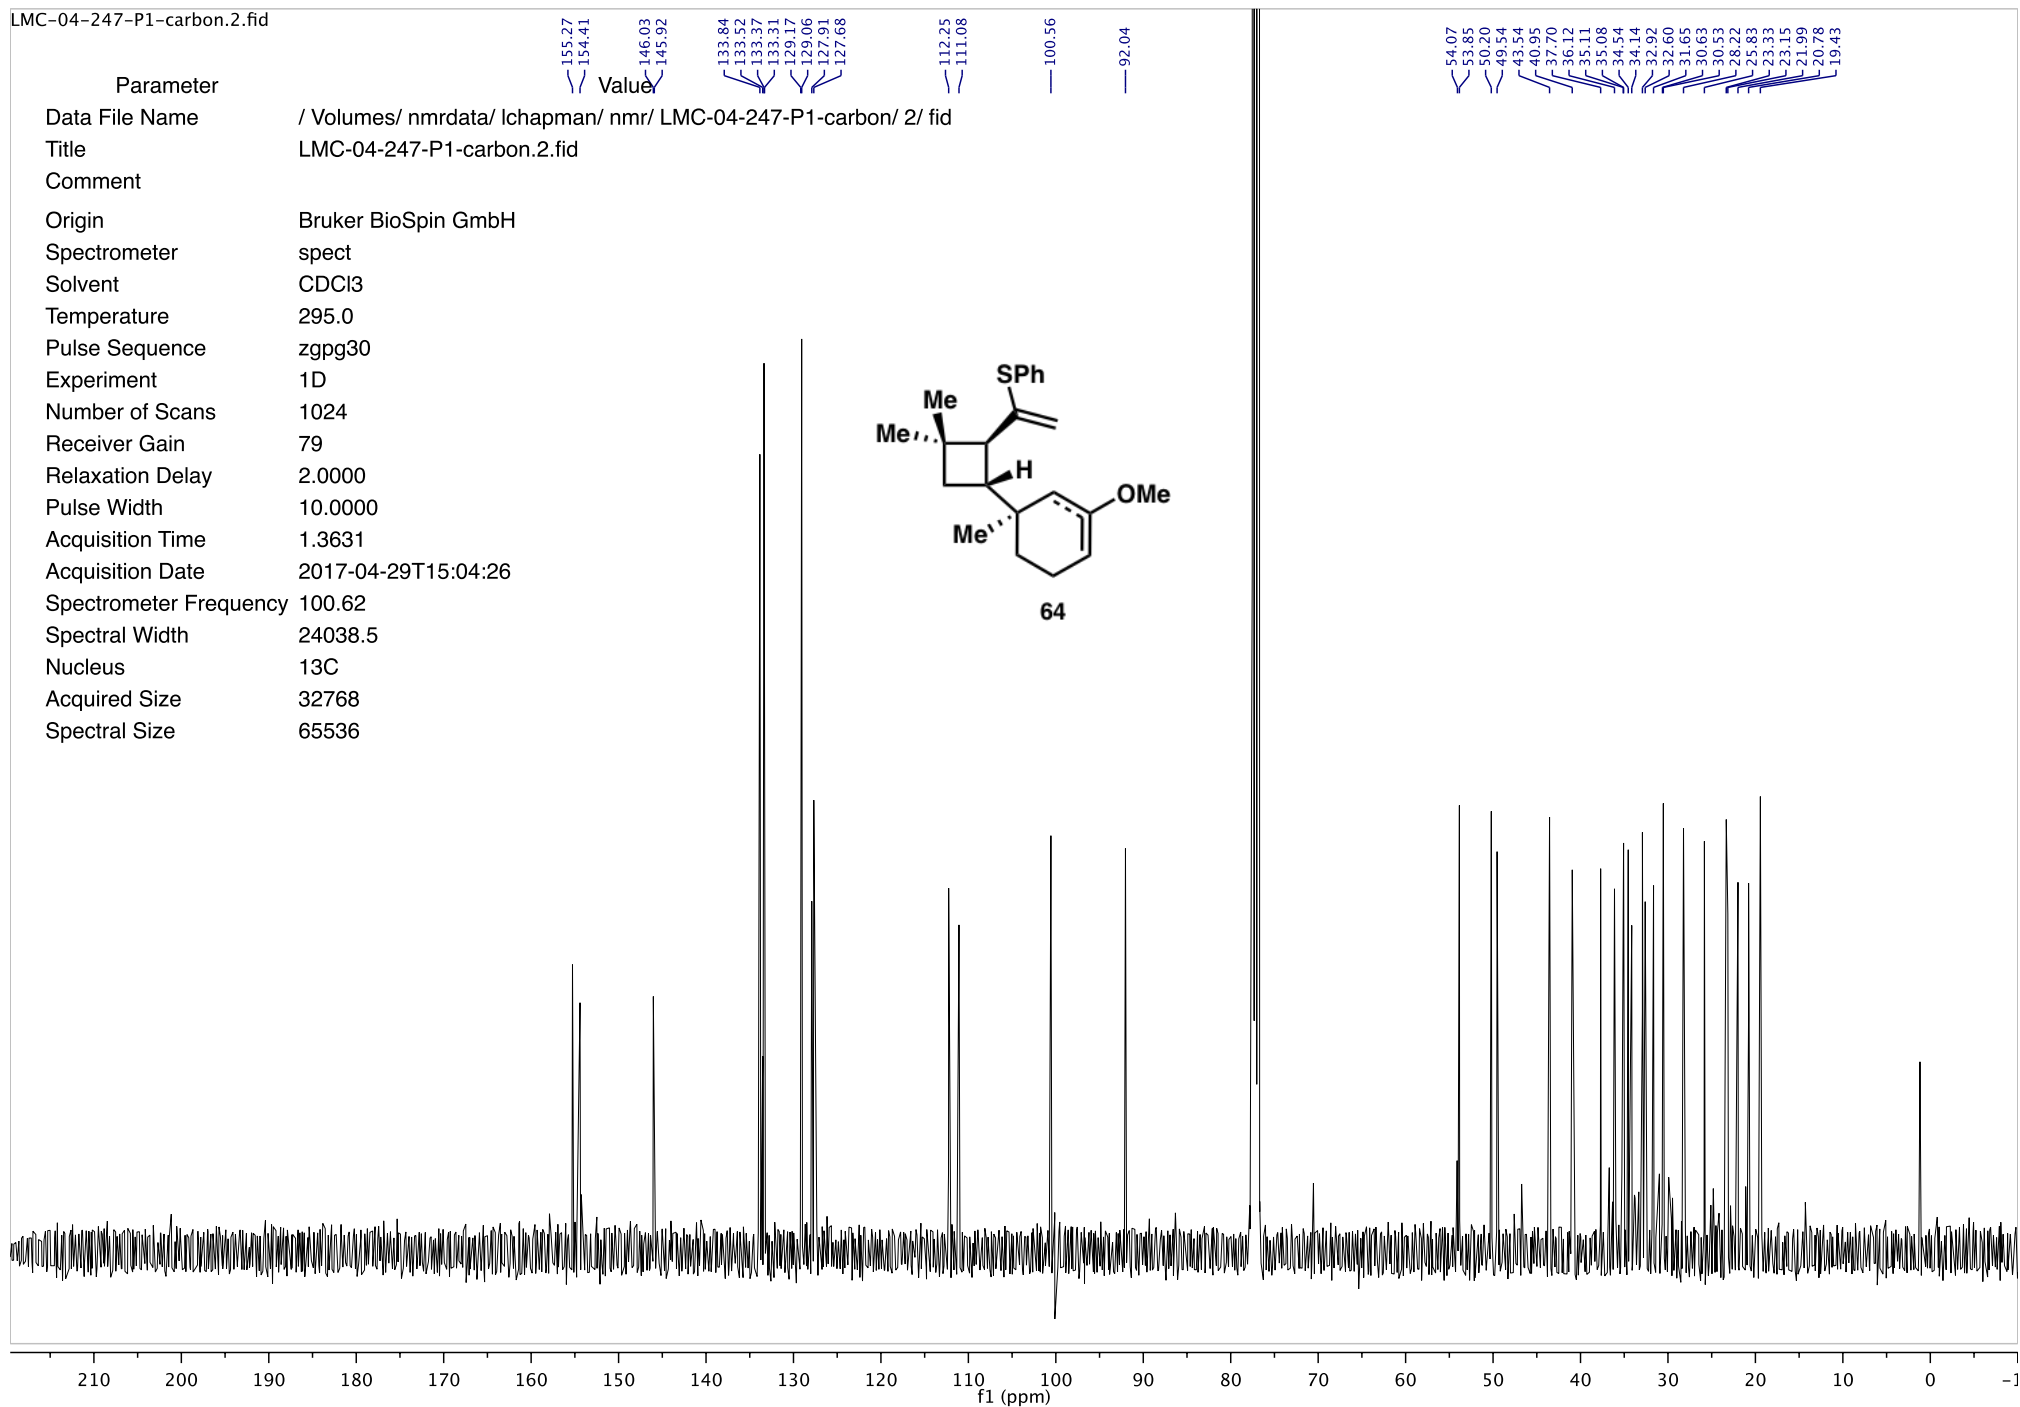

LMC-03-17A-flash.1.1.1r

| Parameter              | Value                                                              |
|------------------------|--------------------------------------------------------------------|
| Data File Name         | /Volumes/nmrdata-1/data/lchapman/nmr/LMC-03-17A-flash/1/pdata/1/1r |
| Title                  | LMC-03-17A-flash.1.1.1r                                            |
| Origin                 | Bruker BioSpin GmbH                                                |
| Spectrometer           | spect                                                              |
| Solvent                | CDCl3                                                              |
| Temperature            | 298.2                                                              |
| Pulse Sequence         | zg30                                                               |
| Experiment             | 1D                                                                 |
| Number of Scans        | 16                                                                 |
| Receiver Gain          | 197                                                                |
| Relaxation Delay       | 5.0000                                                             |
| Pulse Width            | 11.8000                                                            |
| Acquisition Time       | 4.0894                                                             |
| Acquisition Date       | 2015-01-17T18:38:00                                                |
| Spectrometer Frequency | 400.13                                                             |
| Spectral Width         | 8012.8                                                             |
| Nucleus                | 1H                                                                 |
| Acquired Size          | 32768                                                              |
| Spectral Size          | 65536                                                              |

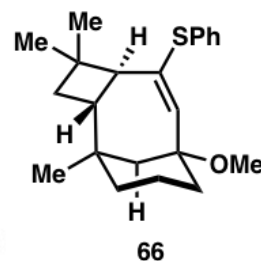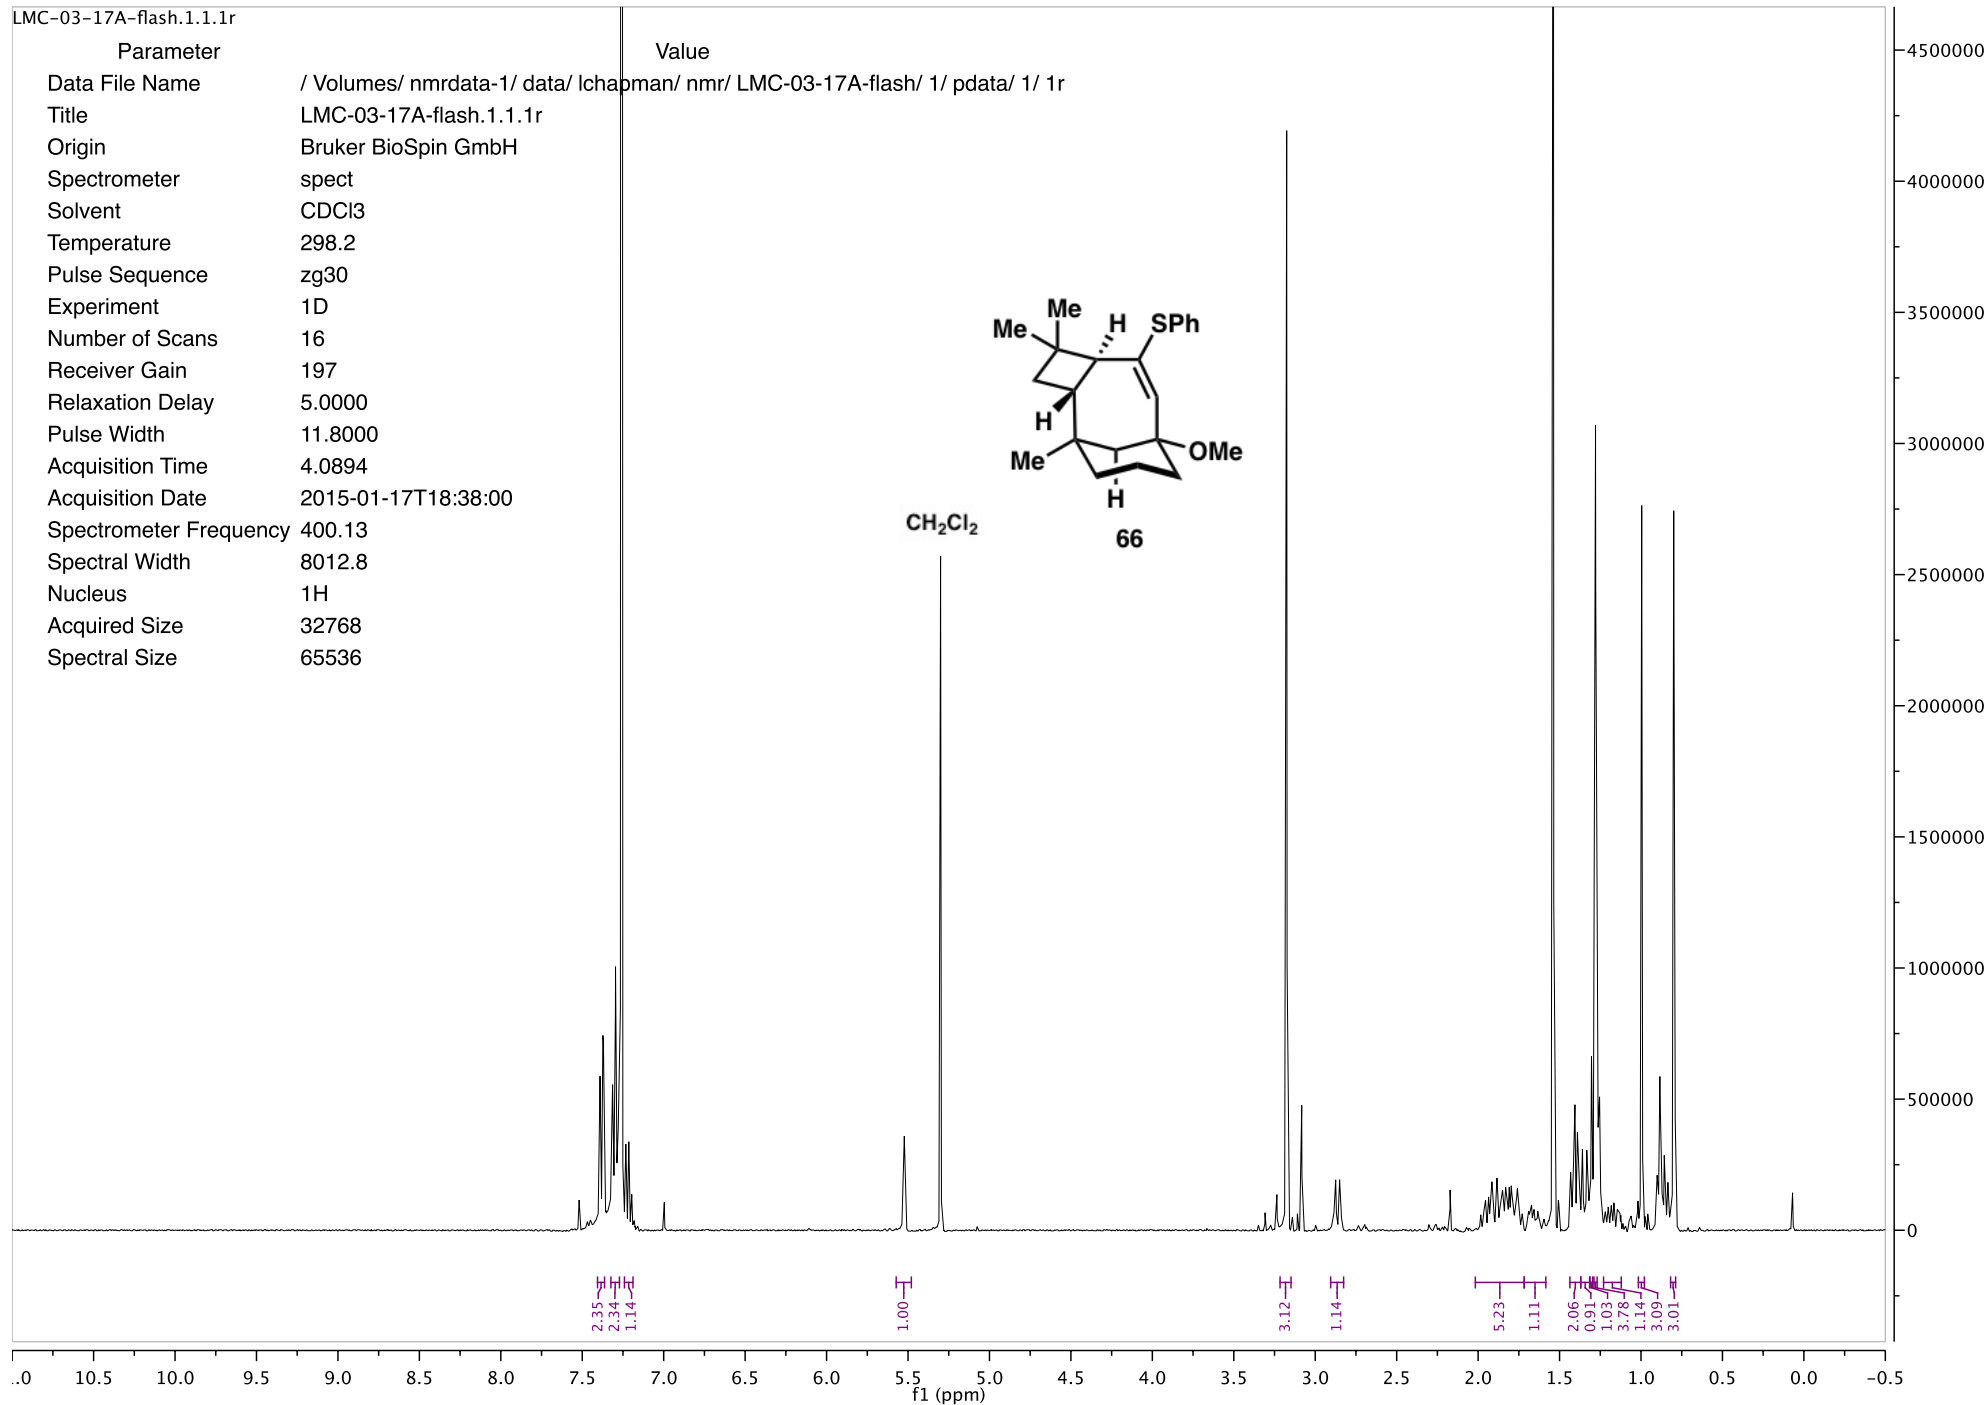

| Parameter              | Value                                                         |
|------------------------|---------------------------------------------------------------|
| Data File Name         | / Volumes/ nmrdata/ lchapman/ nmr/ LMC-04-17A-shegemi/ 3/ fid |
| Title                  | LMC-04-17A-shegemi.3.fid                                      |
| Origin                 | Bruker BioSpin GmbH                                           |
| Spectrometer           | spect                                                         |
| Solvent                | CDCl3                                                         |
| Temperature            | 295.0                                                         |
| Pulse Sequence         | zgpg30                                                        |
| Experiment             | 1D                                                            |
| Number of Scans        | 10500                                                         |
| Receiver Gain          | 79                                                            |
| Relaxation Delay       | 2.0000                                                        |
| Pulse Width            | 10.0000                                                       |
| Acquisition Time       | 1.3631                                                        |
| Acquisition Date       | 2016-12-13T07:04:55                                           |
| Spectrometer Frequency | 100.62                                                        |
| Spectral Width         | 24038.5                                                       |
| Nucleus                | 13C                                                           |
| Acquired Size          | 32768                                                         |
| Spectral Size          | 65536                                                         |

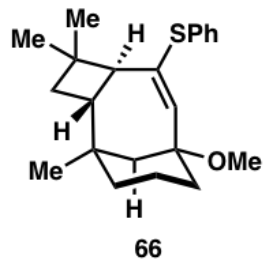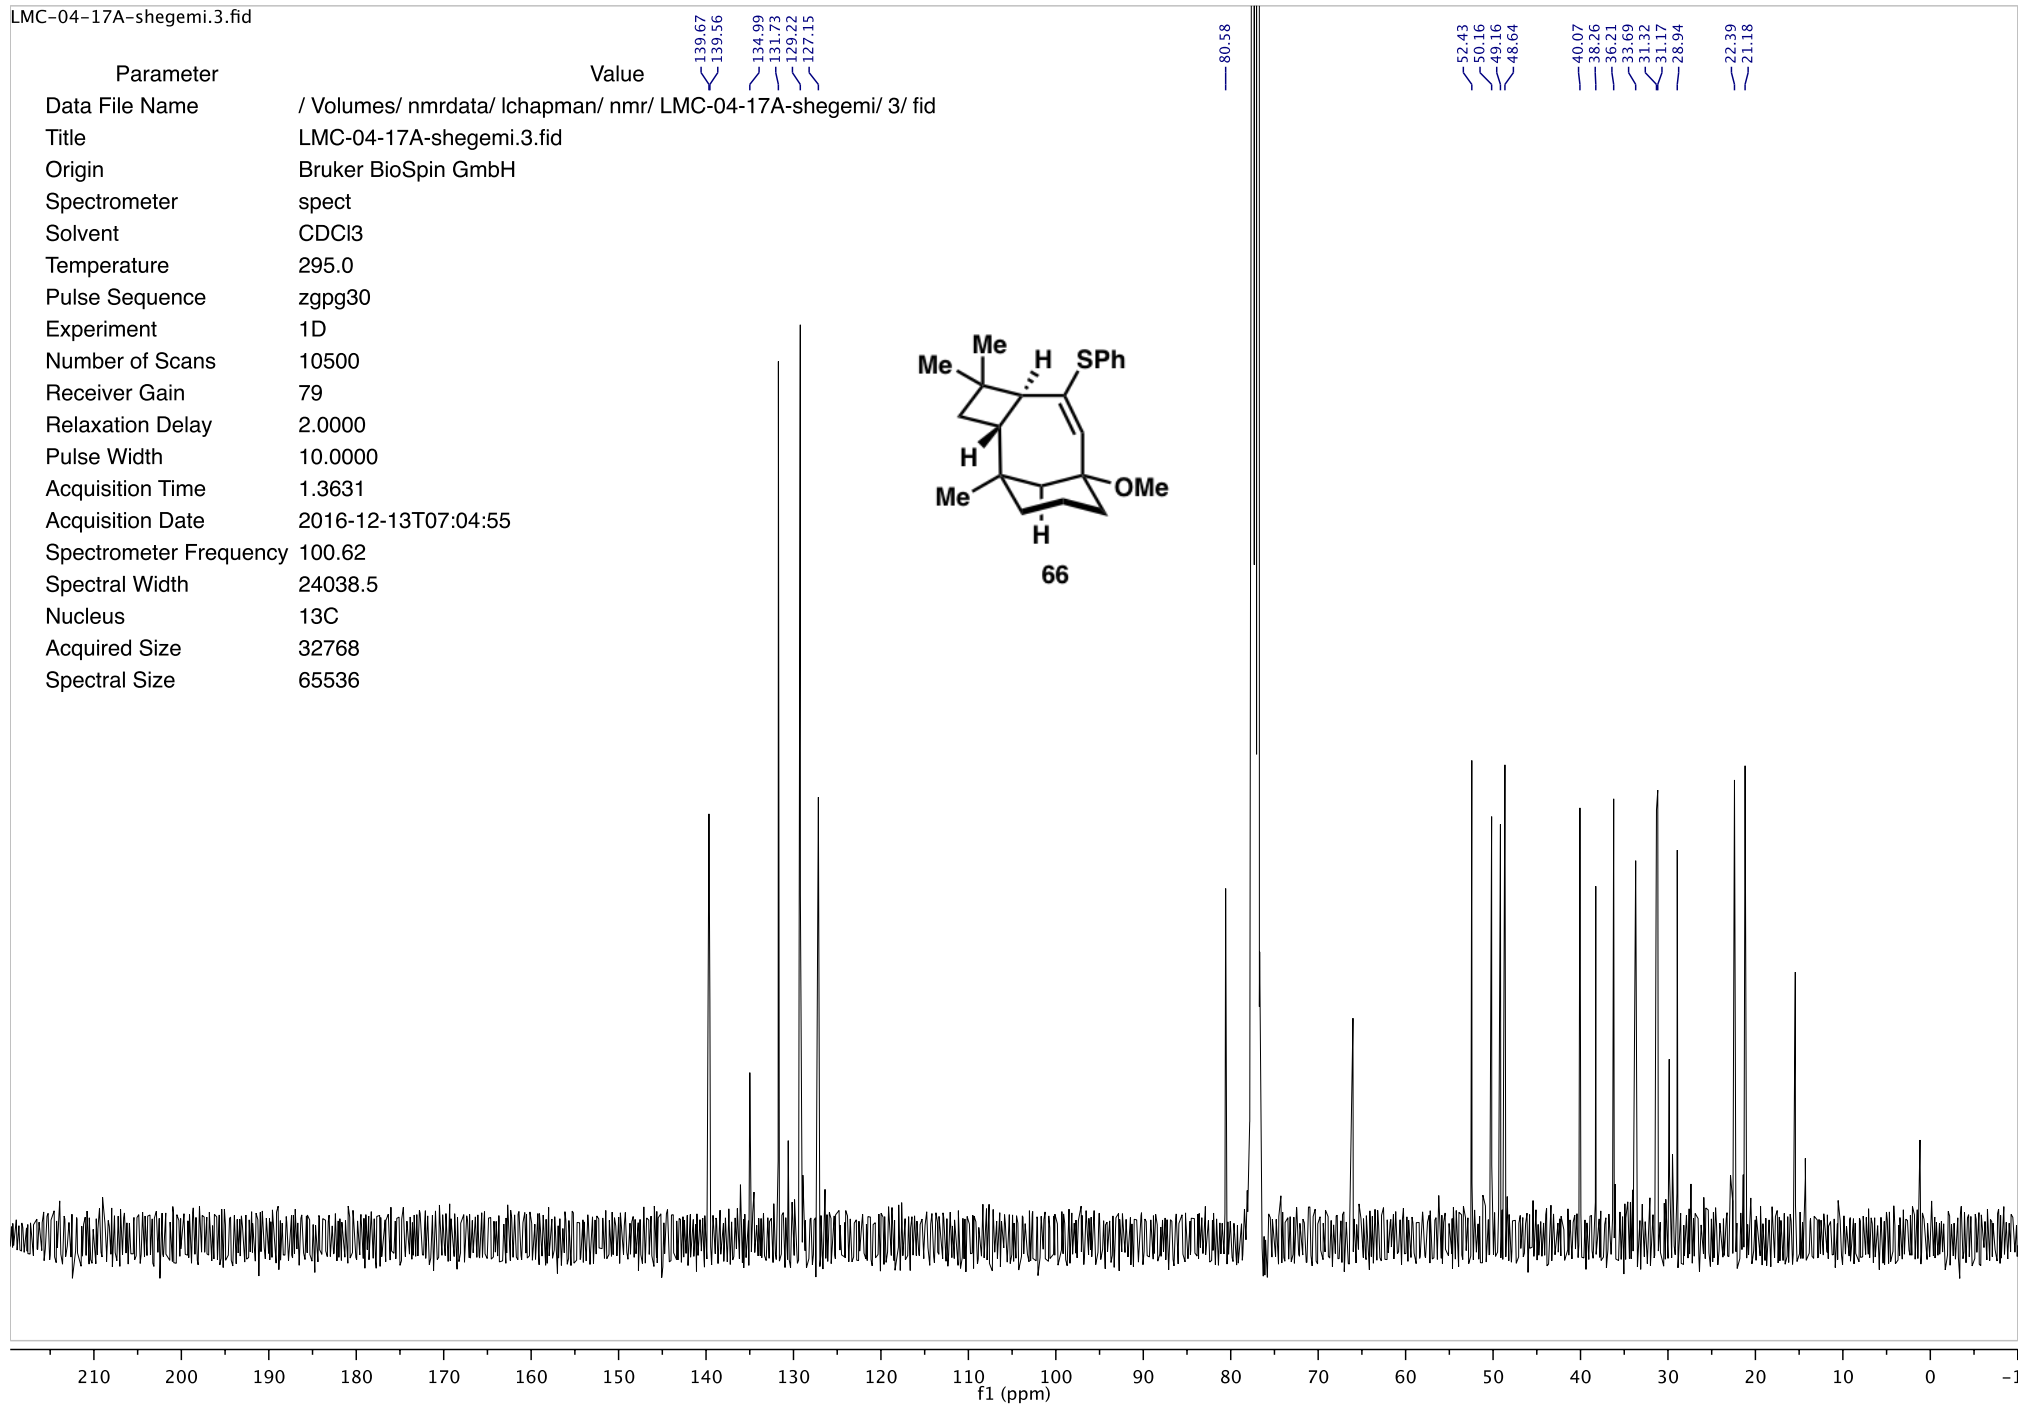

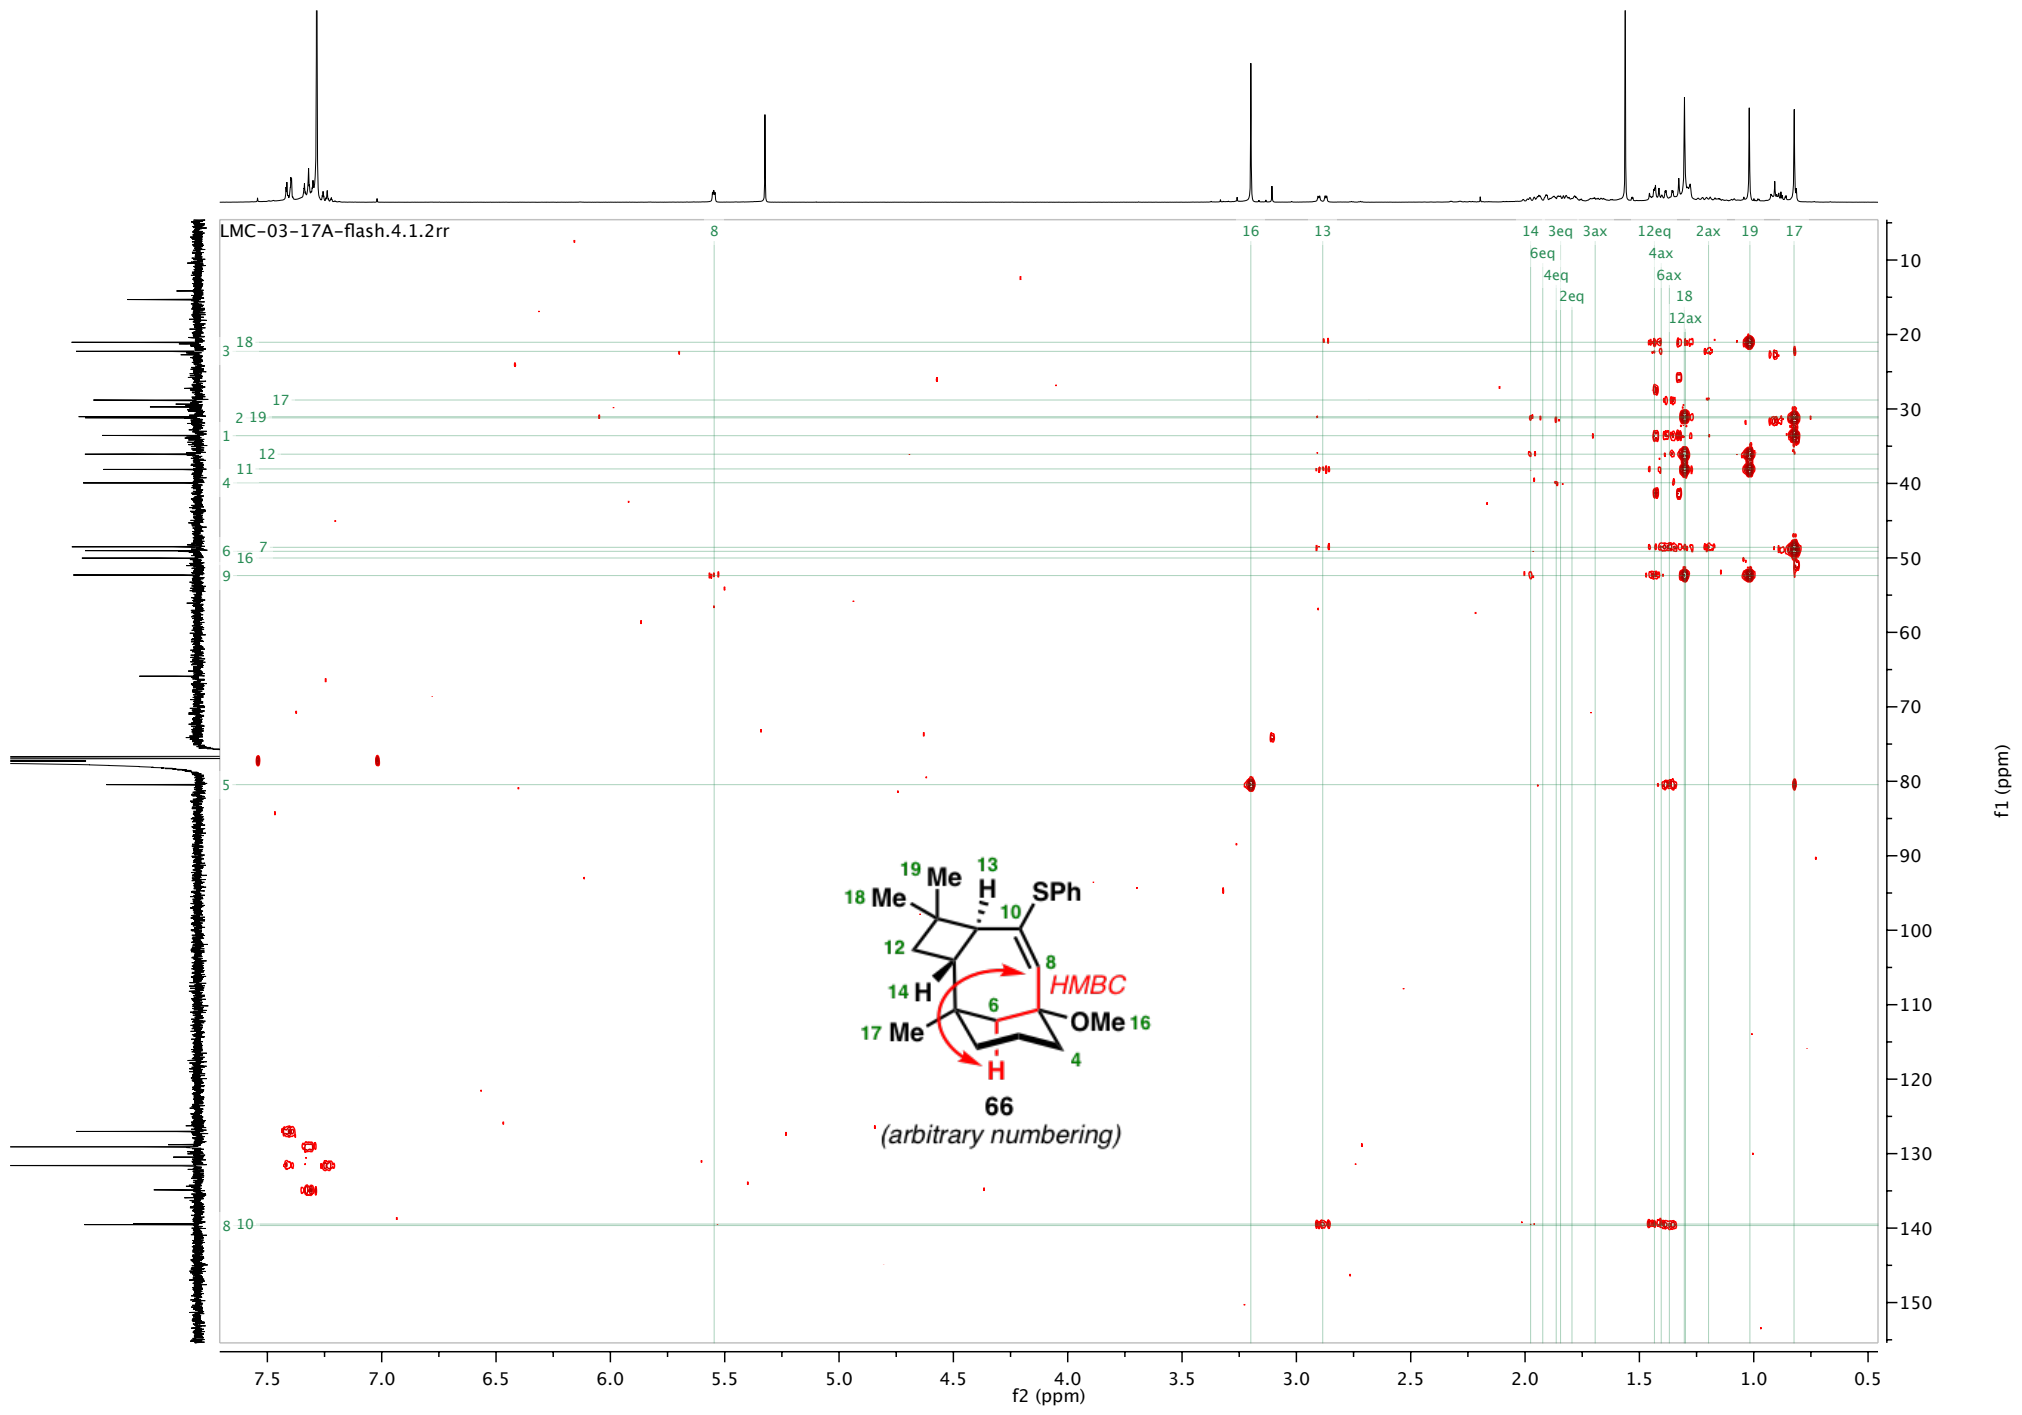

LMC-04-248-2-pTLC-P3.1.fid

| Parameter              | Value                                                         |
|------------------------|---------------------------------------------------------------|
| Data File Name         | /Volumes/nmrdata-1/Ichapman/nmr/ LMC-04-248-2-pTLC-P3/ 1/ fid |
| Title                  | LMC-04-248-2-pTLC-P3.1.fid                                    |
| Comment                |                                                               |
| Origin                 | Bruker BioSpin GmbH                                           |
| Spectrometer           | spect                                                         |
| Solvent                | CDCl3                                                         |
| Temperature            | 294.9                                                         |
| Pulse Sequence         | zg30                                                          |
| Experiment             | 1D                                                            |
| Number of Scans        | 16                                                            |
| Receiver Gain          | 197                                                           |
| Relaxation Delay       | 1.0000                                                        |
| Pulse Width            | 11.7000                                                       |
| Acquisition Time       | 4.0894                                                        |
| Acquisition Date       | 2017-05-01T18:23:31                                           |
| Spectrometer Frequency | 400.13                                                        |
| Spectral Width         | 8012.8                                                        |
| Nucleus                | 1H                                                            |
| Acquired Size          | 32768                                                         |
| Spectral Size          | 65536                                                         |

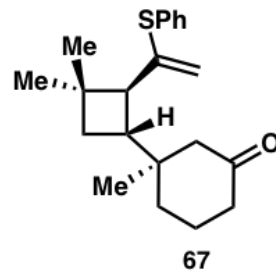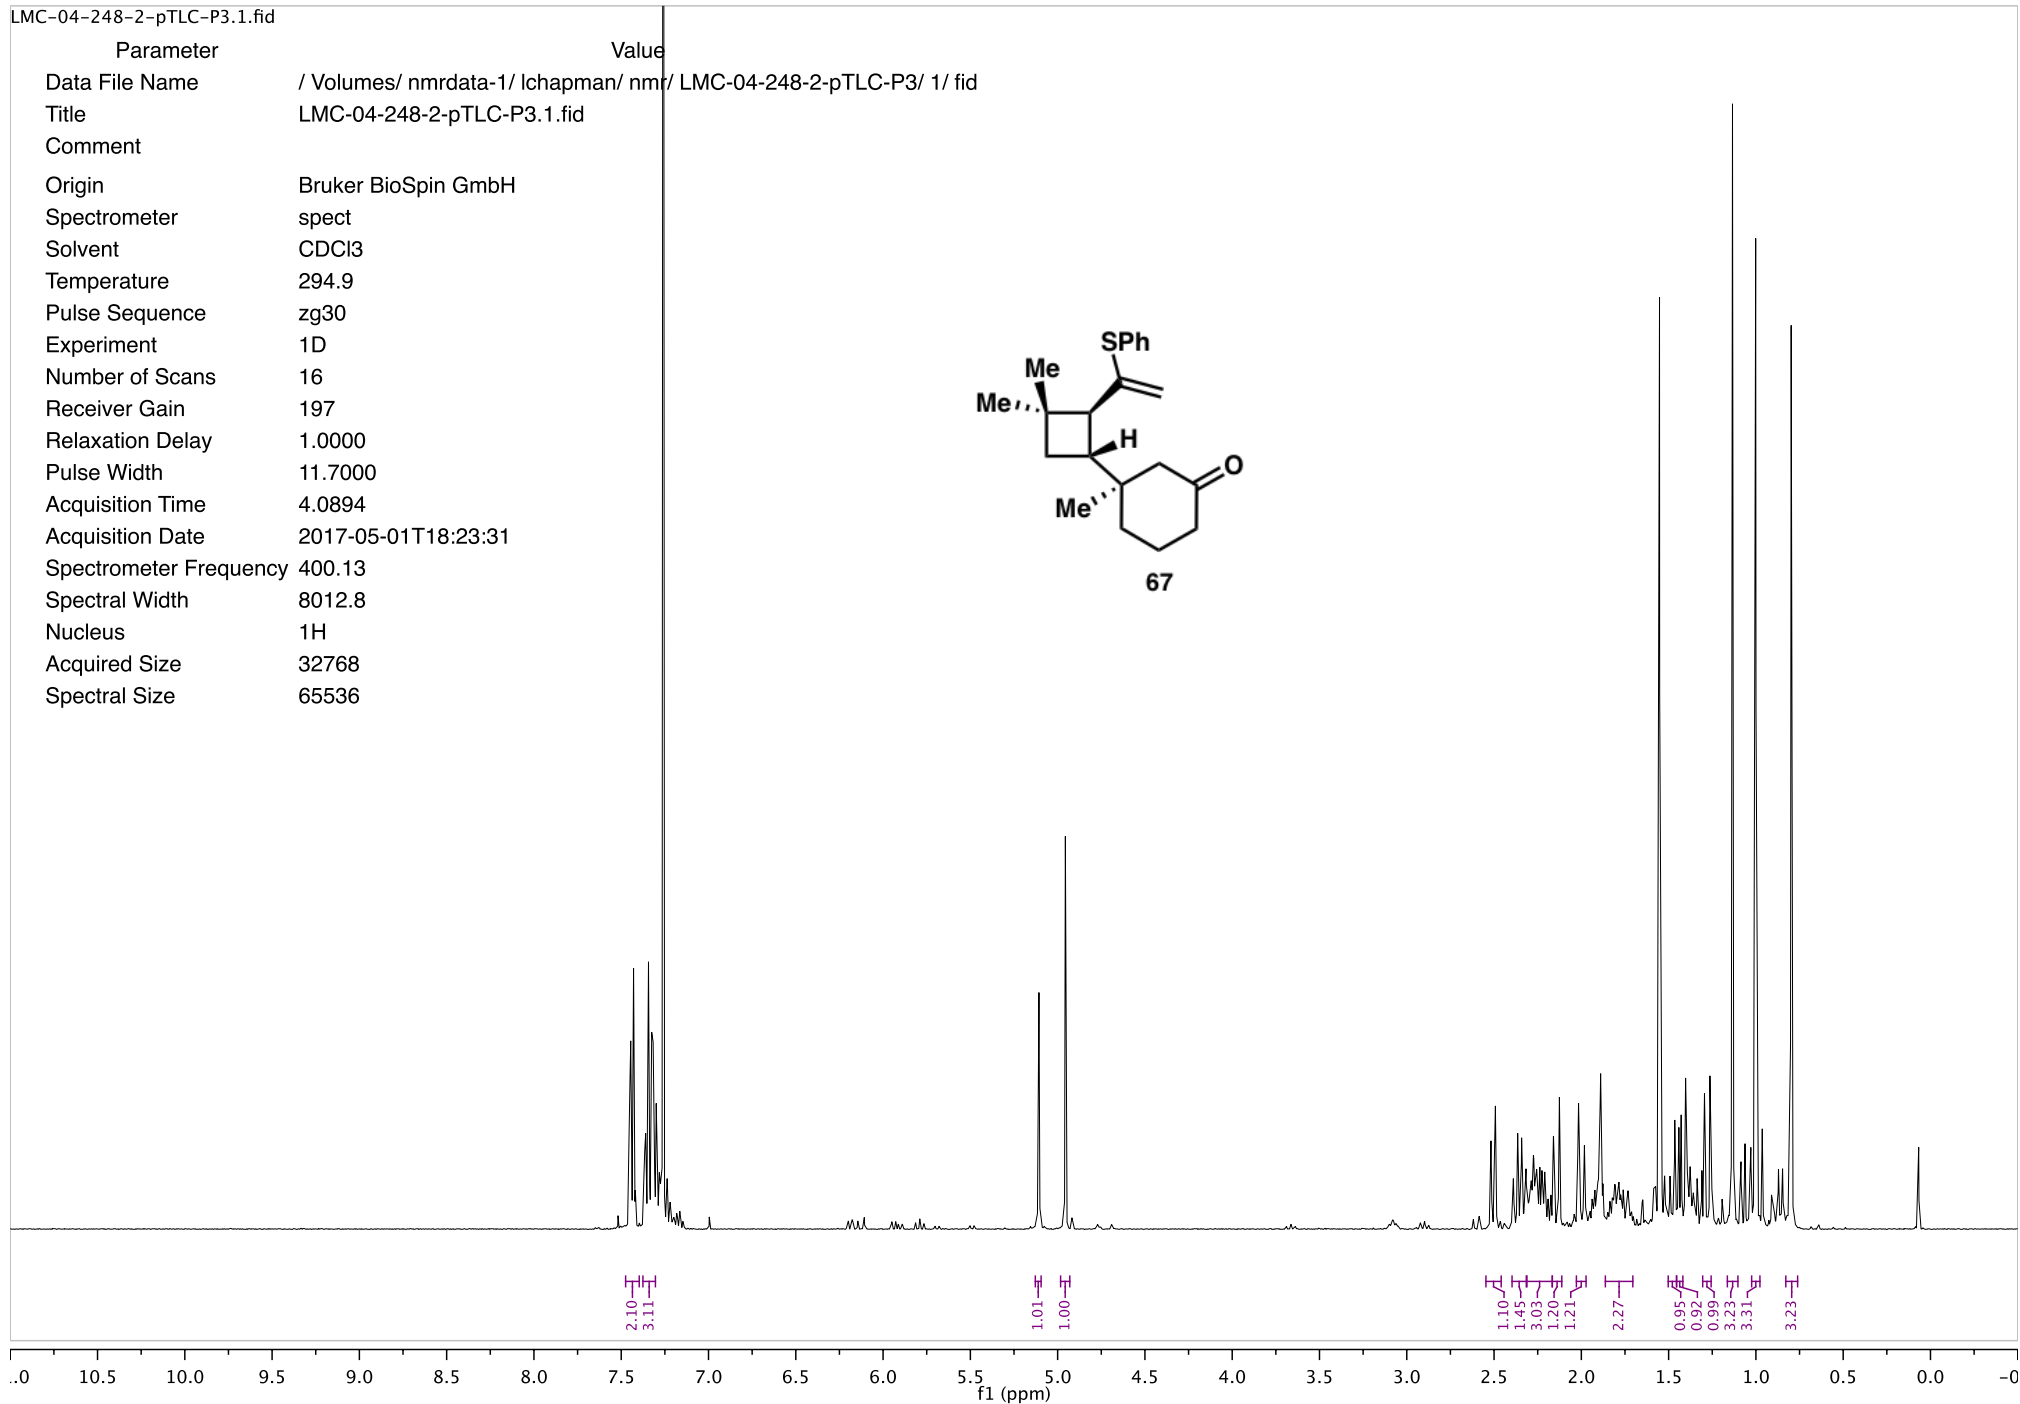

LMC-04-248-2-pTLC-P3.3.fid

| Parameter              | Value                                                             |
|------------------------|-------------------------------------------------------------------|
| Data File Name         | / Volumes/ nmrdata-1/ lchapman/ nmr/ LMC-04-248-2-pTLC-P3/ 3/ fid |
| Title                  | LMC-04-248-2-pTLC-P3.3.fid                                        |
| Comment                |                                                                   |
| Origin                 | Bruker BioSpin GmbH                                               |
| Spectrometer           | spect                                                             |
| Solvent                | CDCl3                                                             |
| Temperature            | 295.0                                                             |
| Pulse Sequence         | zgpg30                                                            |
| Experiment             | 1D                                                                |
| Number of Scans        | 1024                                                              |
| Receiver Gain          | 72                                                                |
| Relaxation Delay       | 2.0000                                                            |
| Pulse Width            | 10.0000                                                           |
| Acquisition Time       | 1.3631                                                            |
| Acquisition Date       | 2017-05-01T22:58:20                                               |
| Spectrometer Frequency | 100.62                                                            |
| Spectral Width         | 24038.5                                                           |
| Nucleus                | 13C                                                               |
| Acquired Size          | 32768                                                             |
| Spectral Size          | 65536                                                             |

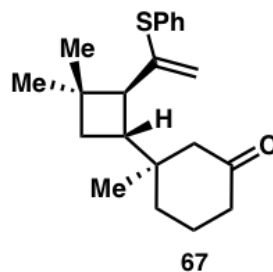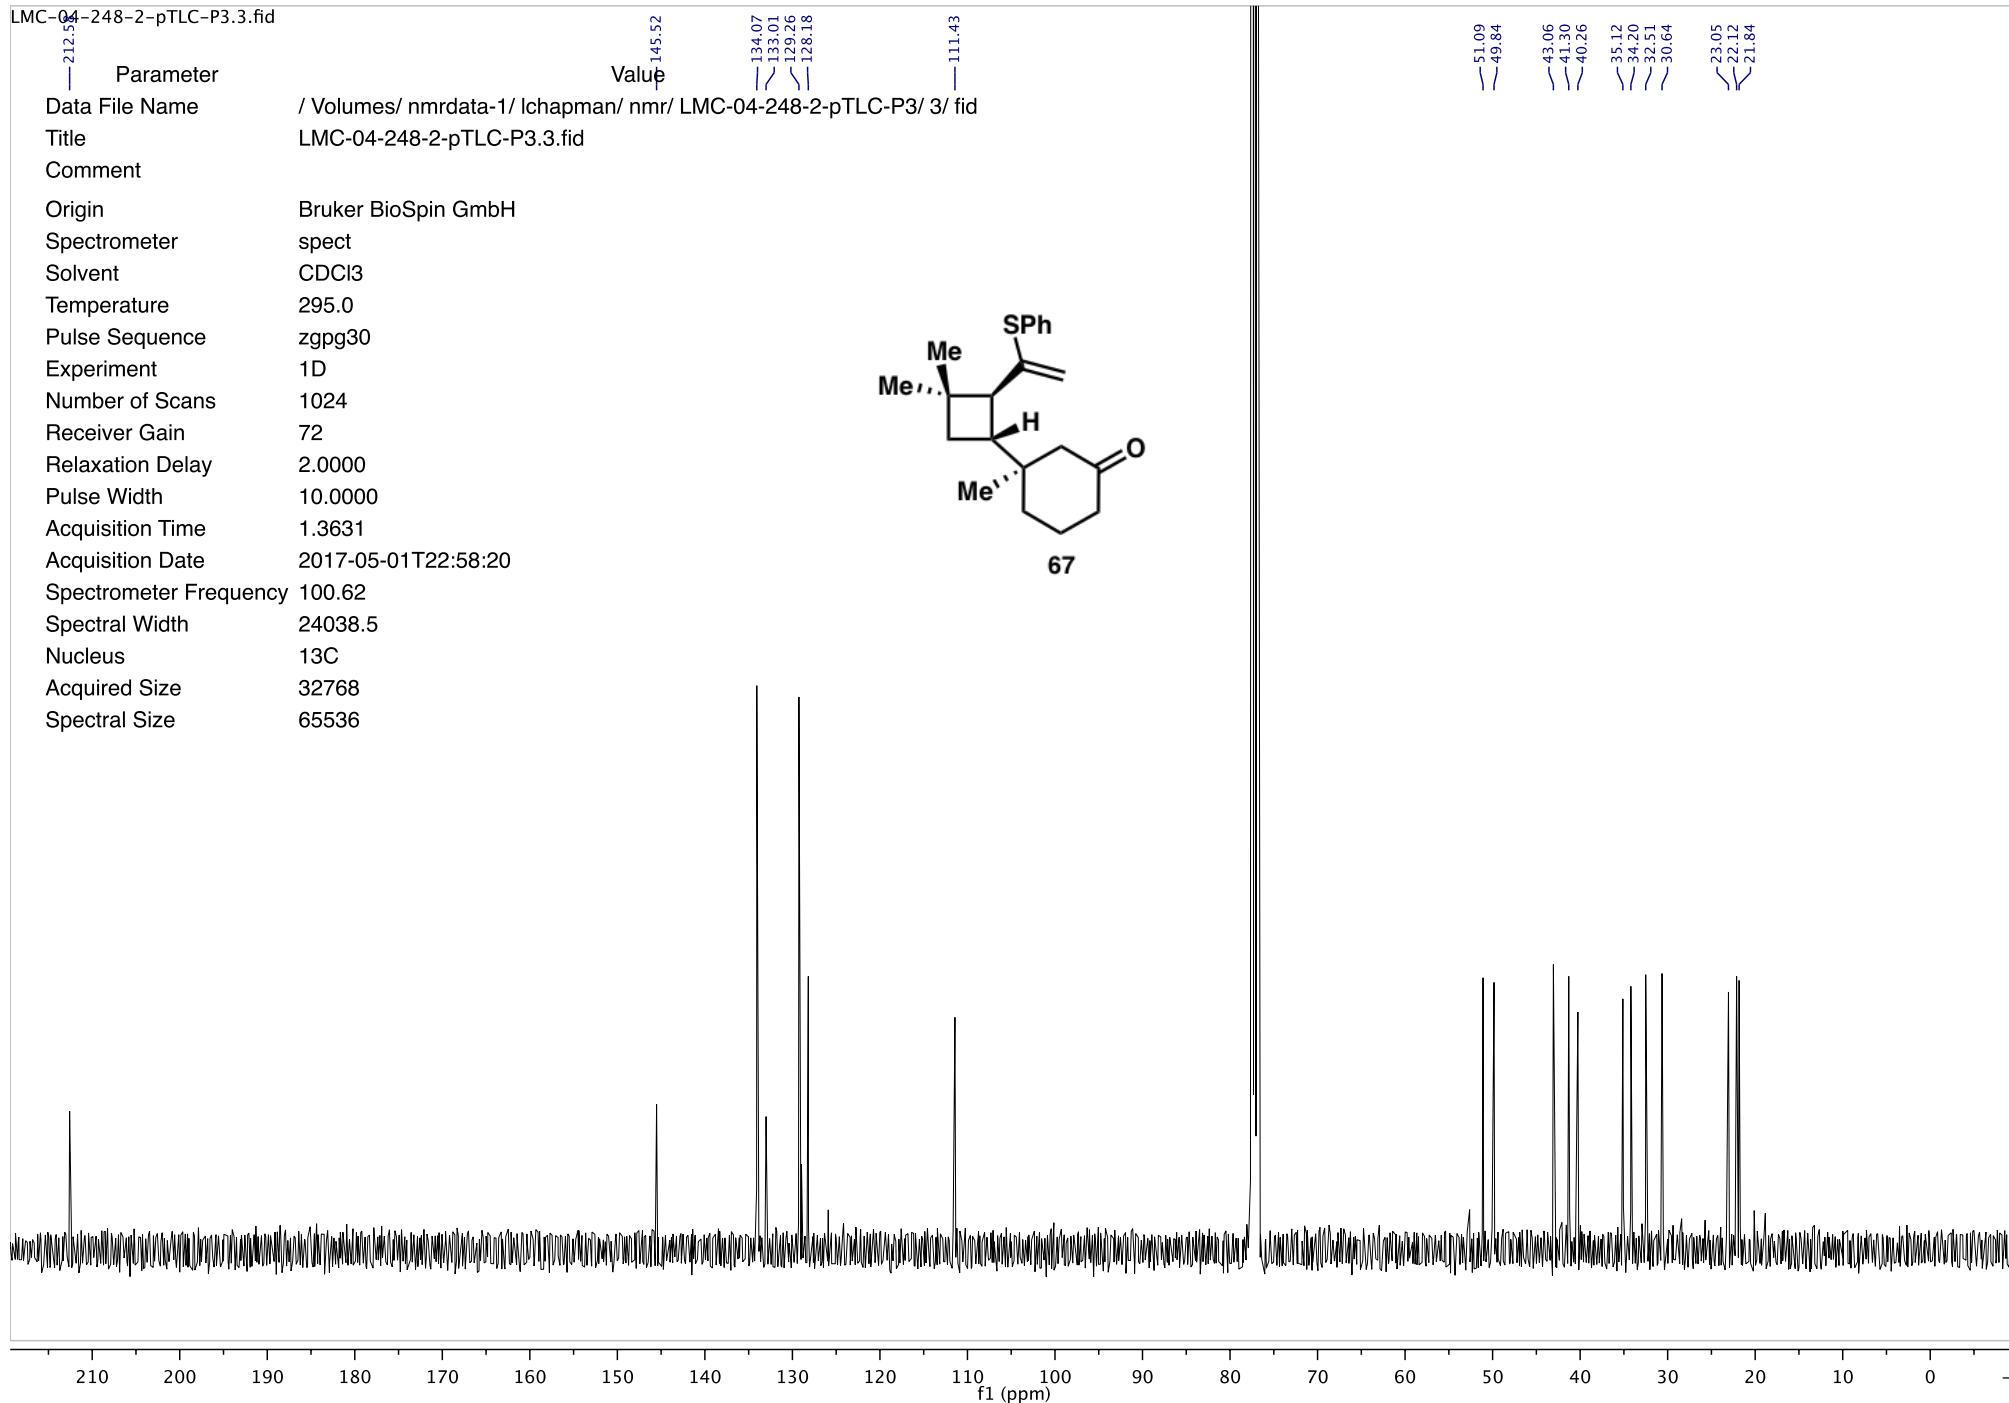

| Parameter              | Value                                                 |
|------------------------|-------------------------------------------------------|
| Data File Name         | / Volumes/ nmrdata/ lchapman/ nmr/ LMC-04-263/ 1/ fid |
| Title                  | LMC-04-263.1.fid                                      |
| Origin                 | Bruker BioSpin GmbH                                   |
| Spectrometer           | spect                                                 |
| Solvent                | CDCl3                                                 |
| Temperature            | 295.0                                                 |
| Pulse Sequence         | zg30                                                  |
| Experiment             | 1D                                                    |
| Number of Scans        | 1                                                     |
| Receiver Gain          | 30                                                    |
| Relaxation Delay       | 1.0000                                                |
| Pulse Width            | 11.7000                                               |
| Acquisition Time       | 4.0894                                                |
| Acquisition Date       | 2017-01-11T16:45:58                                   |
| Spectrometer Frequency | 400.13                                                |
| Spectral Width         | 8012.8                                                |
| Nucleus                | 1H                                                    |
| Acquired Size          | 32768                                                 |
| Spectral Size          | 65536                                                 |

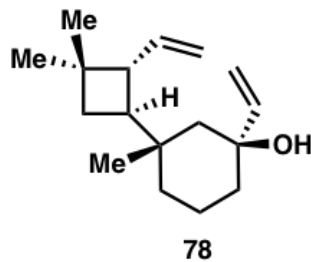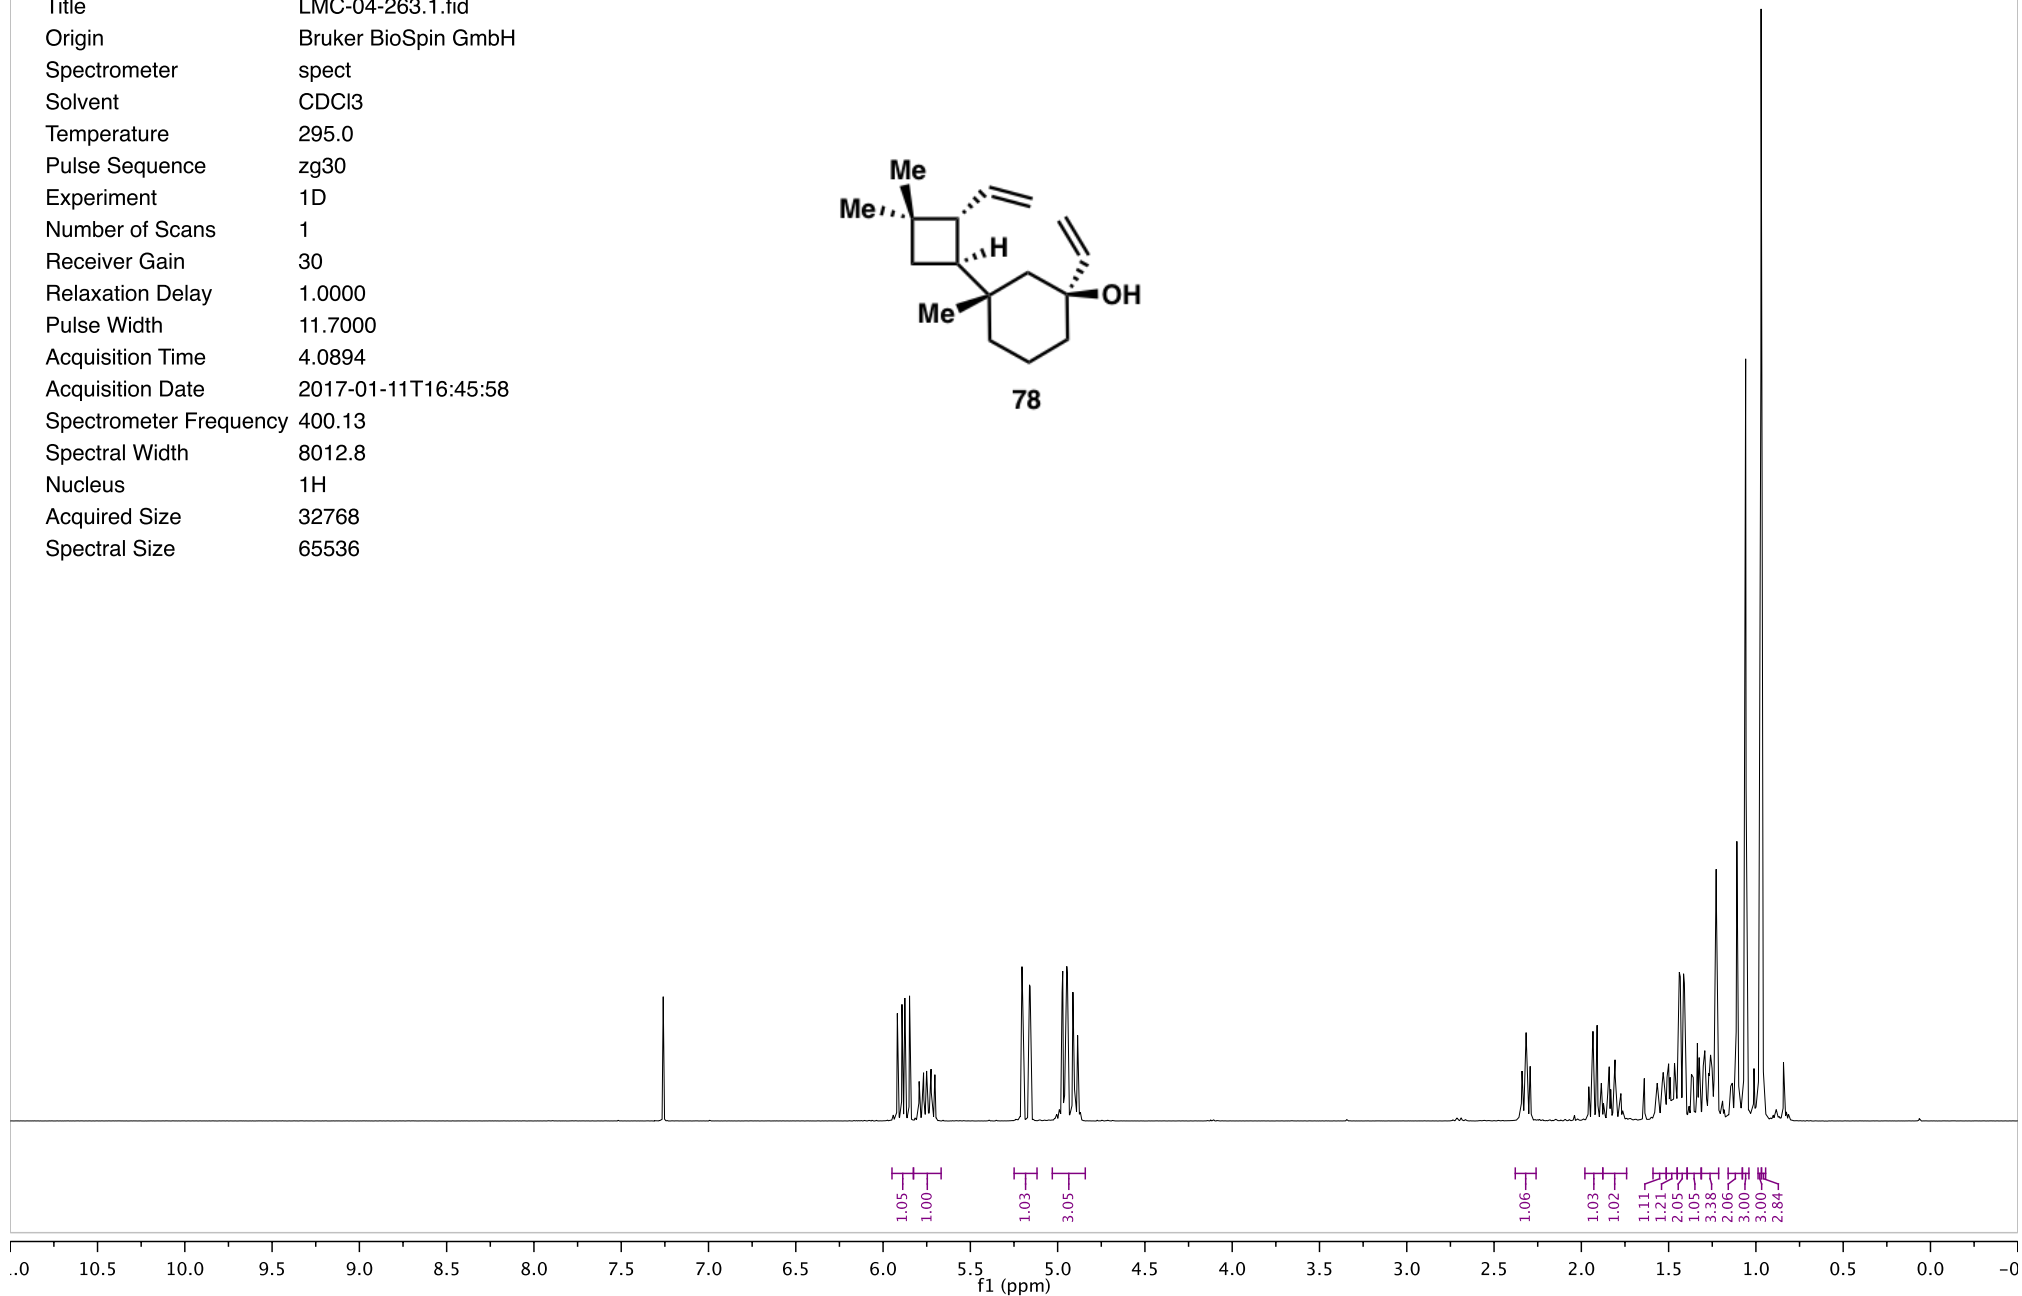



| Parameter              | Value                                                 |
|------------------------|-------------------------------------------------------|
| Data File Name         | / Volumes/ nmrdata/ lchapman/ nmr/ LMC-04-263/ 2/ fid |
| Title                  | LMC-04-263.2.fid                                      |
| Origin                 | Bruker BioSpin GmbH                                   |
| Spectrometer           | spect                                                 |
| Solvent                | CDCl3                                                 |
| Temperature            | 295.0                                                 |
| Pulse Sequence         | zgpg30                                                |
| Experiment             | 1D                                                    |
| Number of Scans        | 128                                                   |
| Receiver Gain          | 64                                                    |
| Relaxation Delay       | 2.0000                                                |
| Pulse Width            | 10.0000                                               |
| Acquisition Time       | 1.3631                                                |
| Acquisition Date       | 2017-01-11T16:53:55                                   |
| Spectrometer Frequency | 100.62                                                |
| Spectral Width         | 24038.5                                               |
| Nucleus                | 13C                                                   |
| Acquired Size          | 32768                                                 |
| Spectral Size          | 65536                                                 |

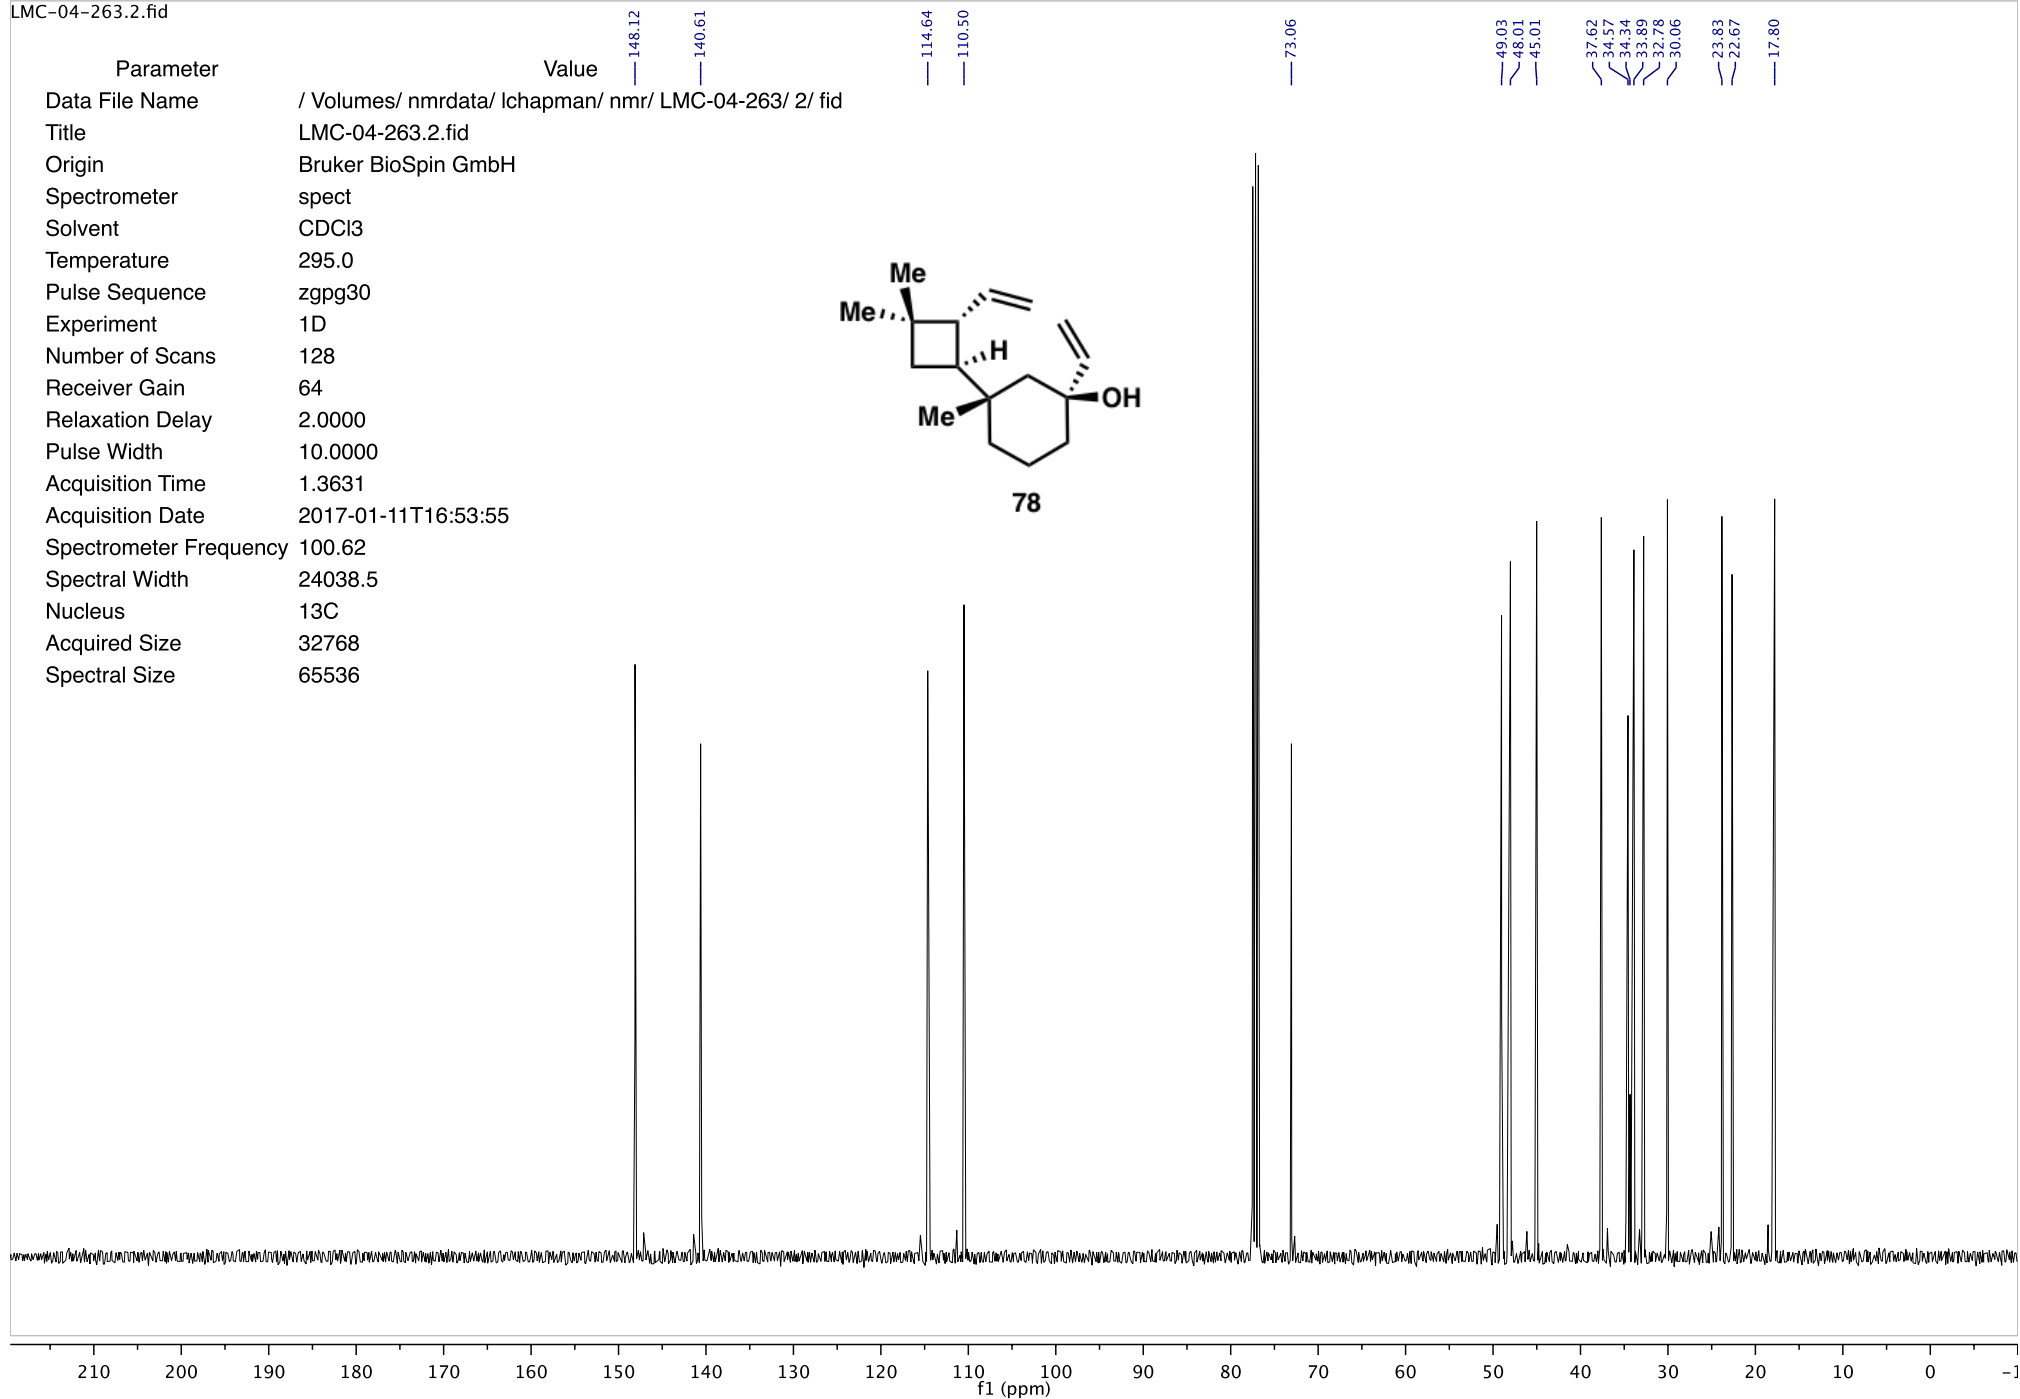

LMC-04-264-RCM.1.fid

| Parameter              | Value                                                     |
|------------------------|-----------------------------------------------------------|
| Data File Name         | / Volumes/ nmrdata/ lchapman/ nmr/ LMC-04-264-RCM/ 1/ fid |
| Title                  | LMC-04-264-RCM.1.fid                                      |
| Origin                 | Bruker BioSpin GmbH                                       |
| Spectrometer           | spect                                                     |
| Solvent                | CDCl3                                                     |
| Temperature            | 295.0                                                     |
| Pulse Sequence         | zg30                                                      |
| Experiment             | 1D                                                        |
| Number of Scans        | 1                                                         |
| Receiver Gain          | 30                                                        |
| Relaxation Delay       | 1.0000                                                    |
| Pulse Width            | 11.7000                                                   |
| Acquisition Time       | 4.0894                                                    |
| Acquisition Date       | 2017-01-12T19:30:10                                       |
| Spectrometer Frequency | 400.13                                                    |
| Spectral Width         | 8012.8                                                    |
| Nucleus                | 1H                                                        |
| Acquired Size          | 32768                                                     |
| Spectral Size          | 65536                                                     |

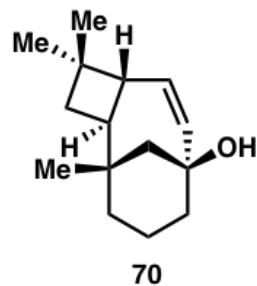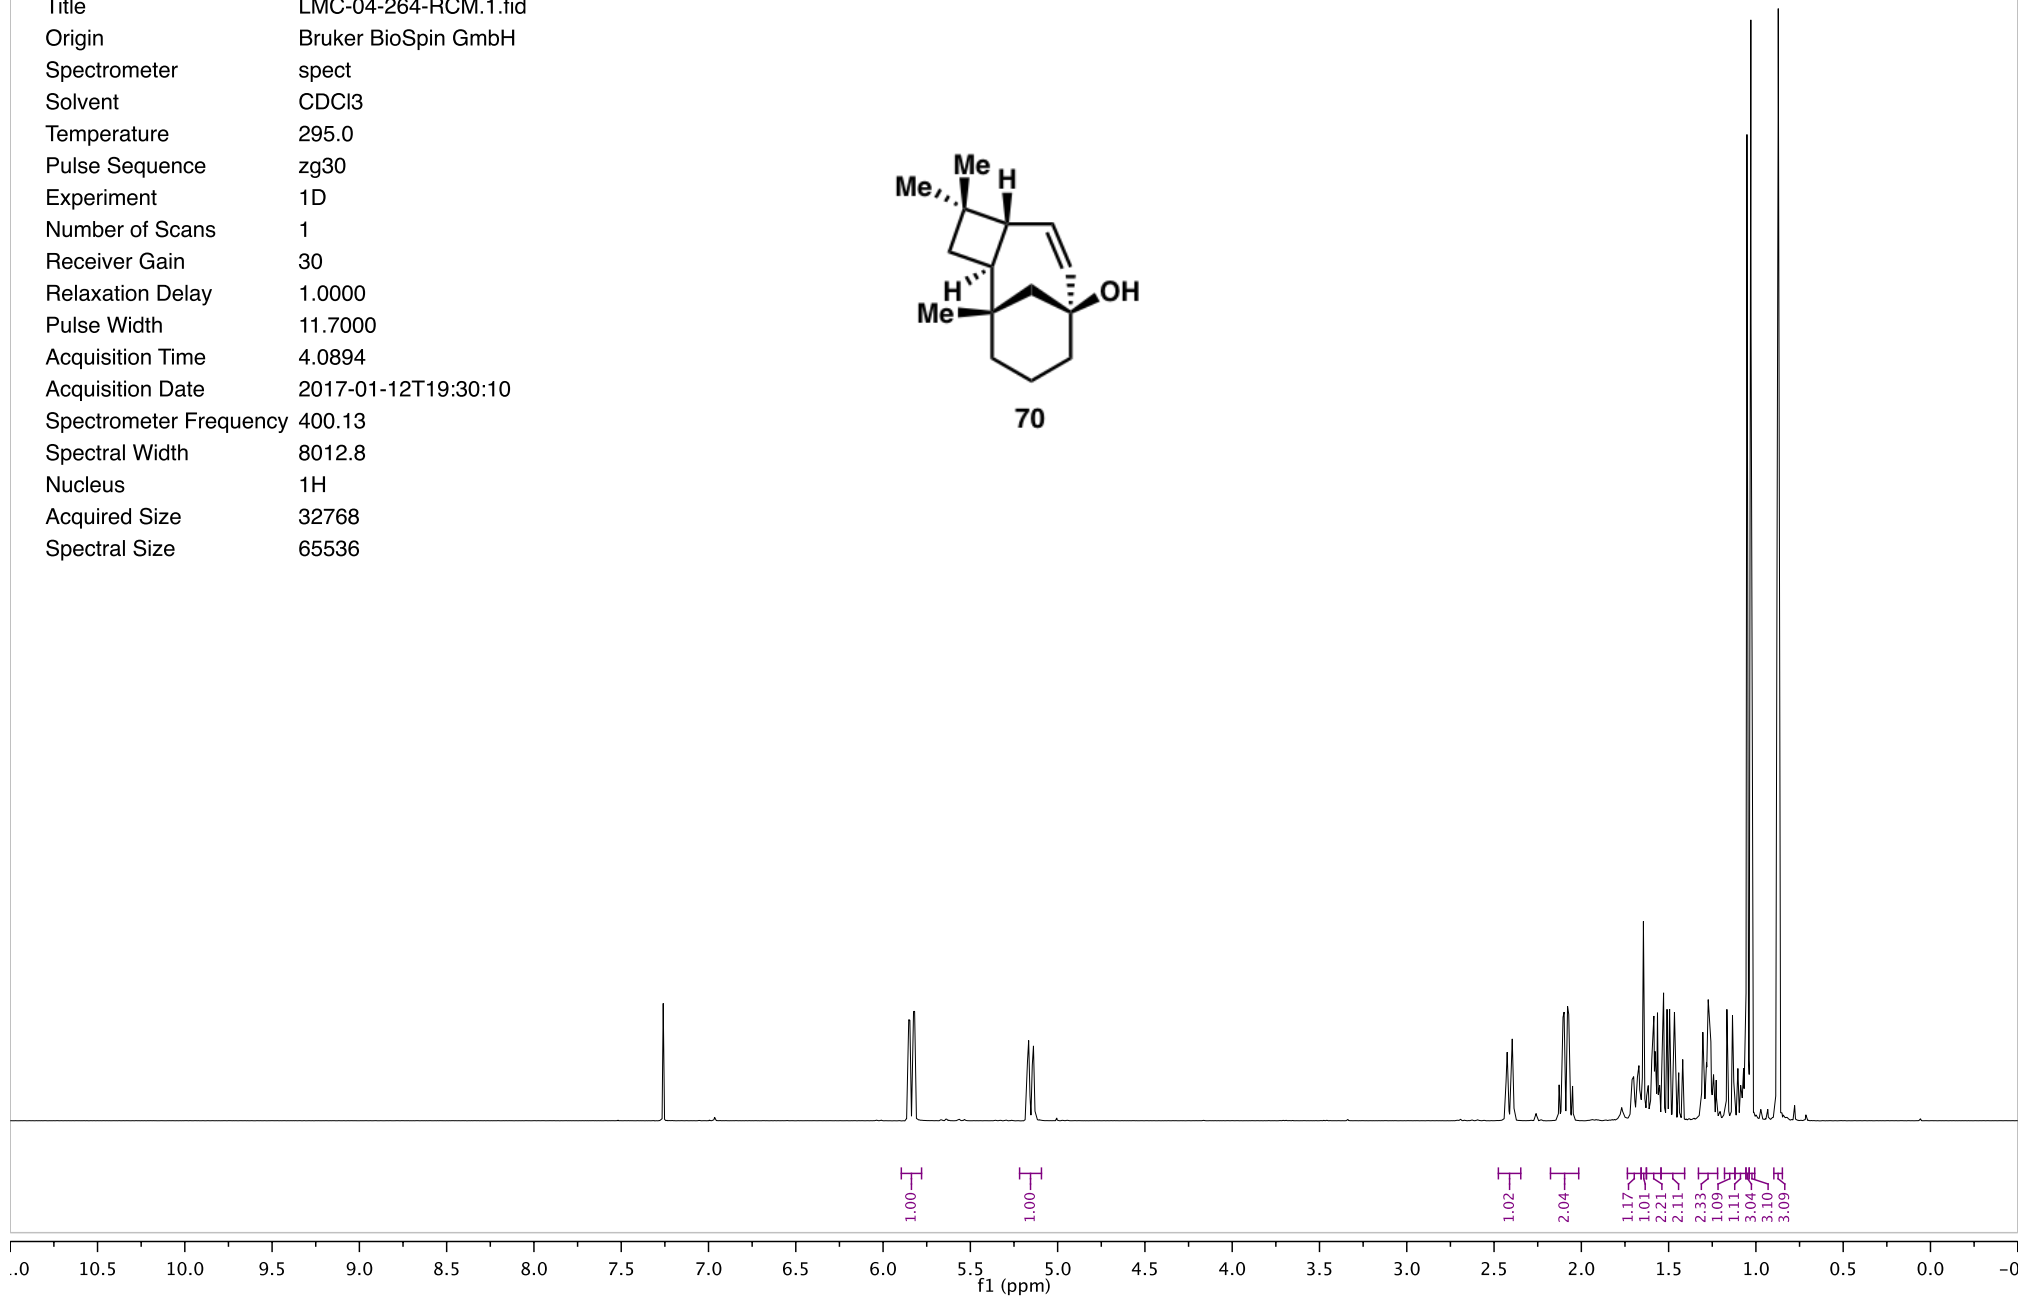

| Parameter              | Value                                                     |
|------------------------|-----------------------------------------------------------|
| Data File Name         | / Volumes/ nmrdata/ lchapman/ nmr/ LMC-04-264-RCM/ 2/ fid |
| Title                  | LMC-04-264-RCM.2.fid                                      |
| Origin                 | Bruker BioSpin GmbH                                       |
| Spectrometer           | spect                                                     |
| Solvent                | CDCl3                                                     |
| Temperature            | 295.0                                                     |
| Pulse Sequence         | zgpg30                                                    |
| Experiment             | 1D                                                        |
| Number of Scans        | 1024                                                      |
| Receiver Gain          | 88                                                        |
| Relaxation Delay       | 2.0000                                                    |
| Pulse Width            | 10.0000                                                   |
| Acquisition Time       | 1.3631                                                    |
| Acquisition Date       | 2017-01-12T19:29:40                                       |
| Spectrometer Frequency | 100.62                                                    |
| Spectral Width         | 24038.5                                                   |
| Nucleus                | 13C                                                       |
| Acquired Size          | 32768                                                     |
| Spectral Size          | 65536                                                     |



134.06  
132.48  
75.14  
49.91  
45.30  
43.91  
38.97  
38.09  
37.78  
34.99  
32.60  
30.94  
26.94  
21.32  
20.19

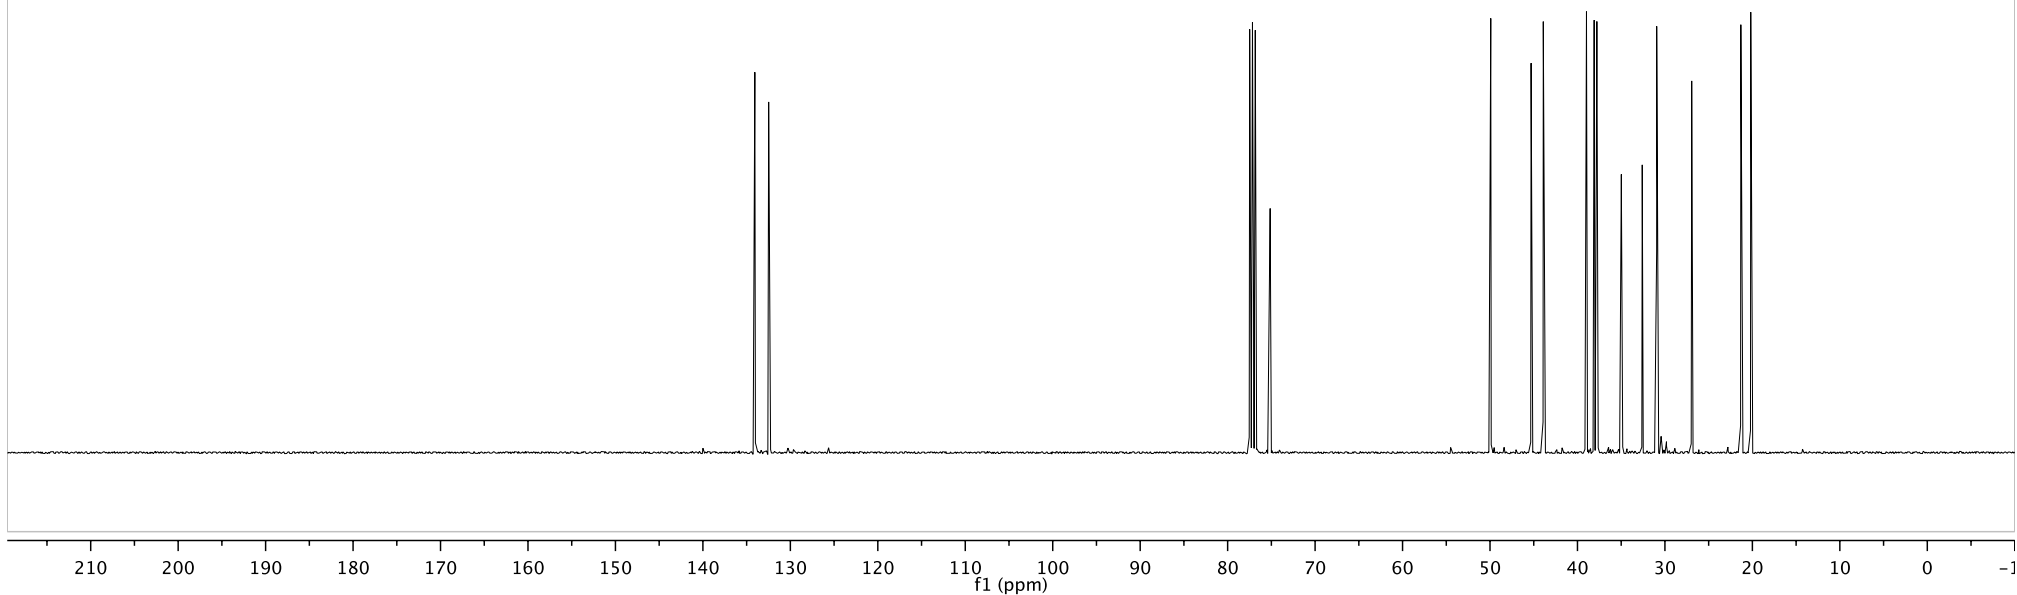

| Parameter              | Value                                                        |
|------------------------|--------------------------------------------------------------|
| Data File Name         | / Volumes/ nmrdata/ lchapman/ nmr/ LMC-04-265-hydrog/ 3/ fid |
| Title                  | LMC-04-265-hydrog.3.fid                                      |
| Comment                |                                                              |
| Origin                 | Bruker BioSpin GmbH                                          |
| Spectrometer           | spect                                                        |
| Solvent                | CDCl3                                                        |
| Temperature            | 294.9                                                        |
| Pulse Sequence         | zg30                                                         |
| Experiment             | 1D                                                           |
| Number of Scans        | 16                                                           |
| Receiver Gain          | 14                                                           |
| Relaxation Delay       | 1.0000                                                       |
| Pulse Width            | 11.7000                                                      |
| Acquisition Time       | 4.0894                                                       |
| Acquisition Date       | 2017-01-18T15:02:41                                          |
| Spectrometer Frequency | 400.13                                                       |
| Spectral Width         | 8012.8                                                       |
| Nucleus                | 1H                                                           |
| Acquired Size          | 32768                                                        |
| Spectral Size          | 65536                                                        |

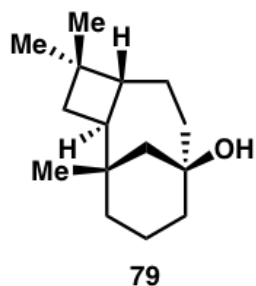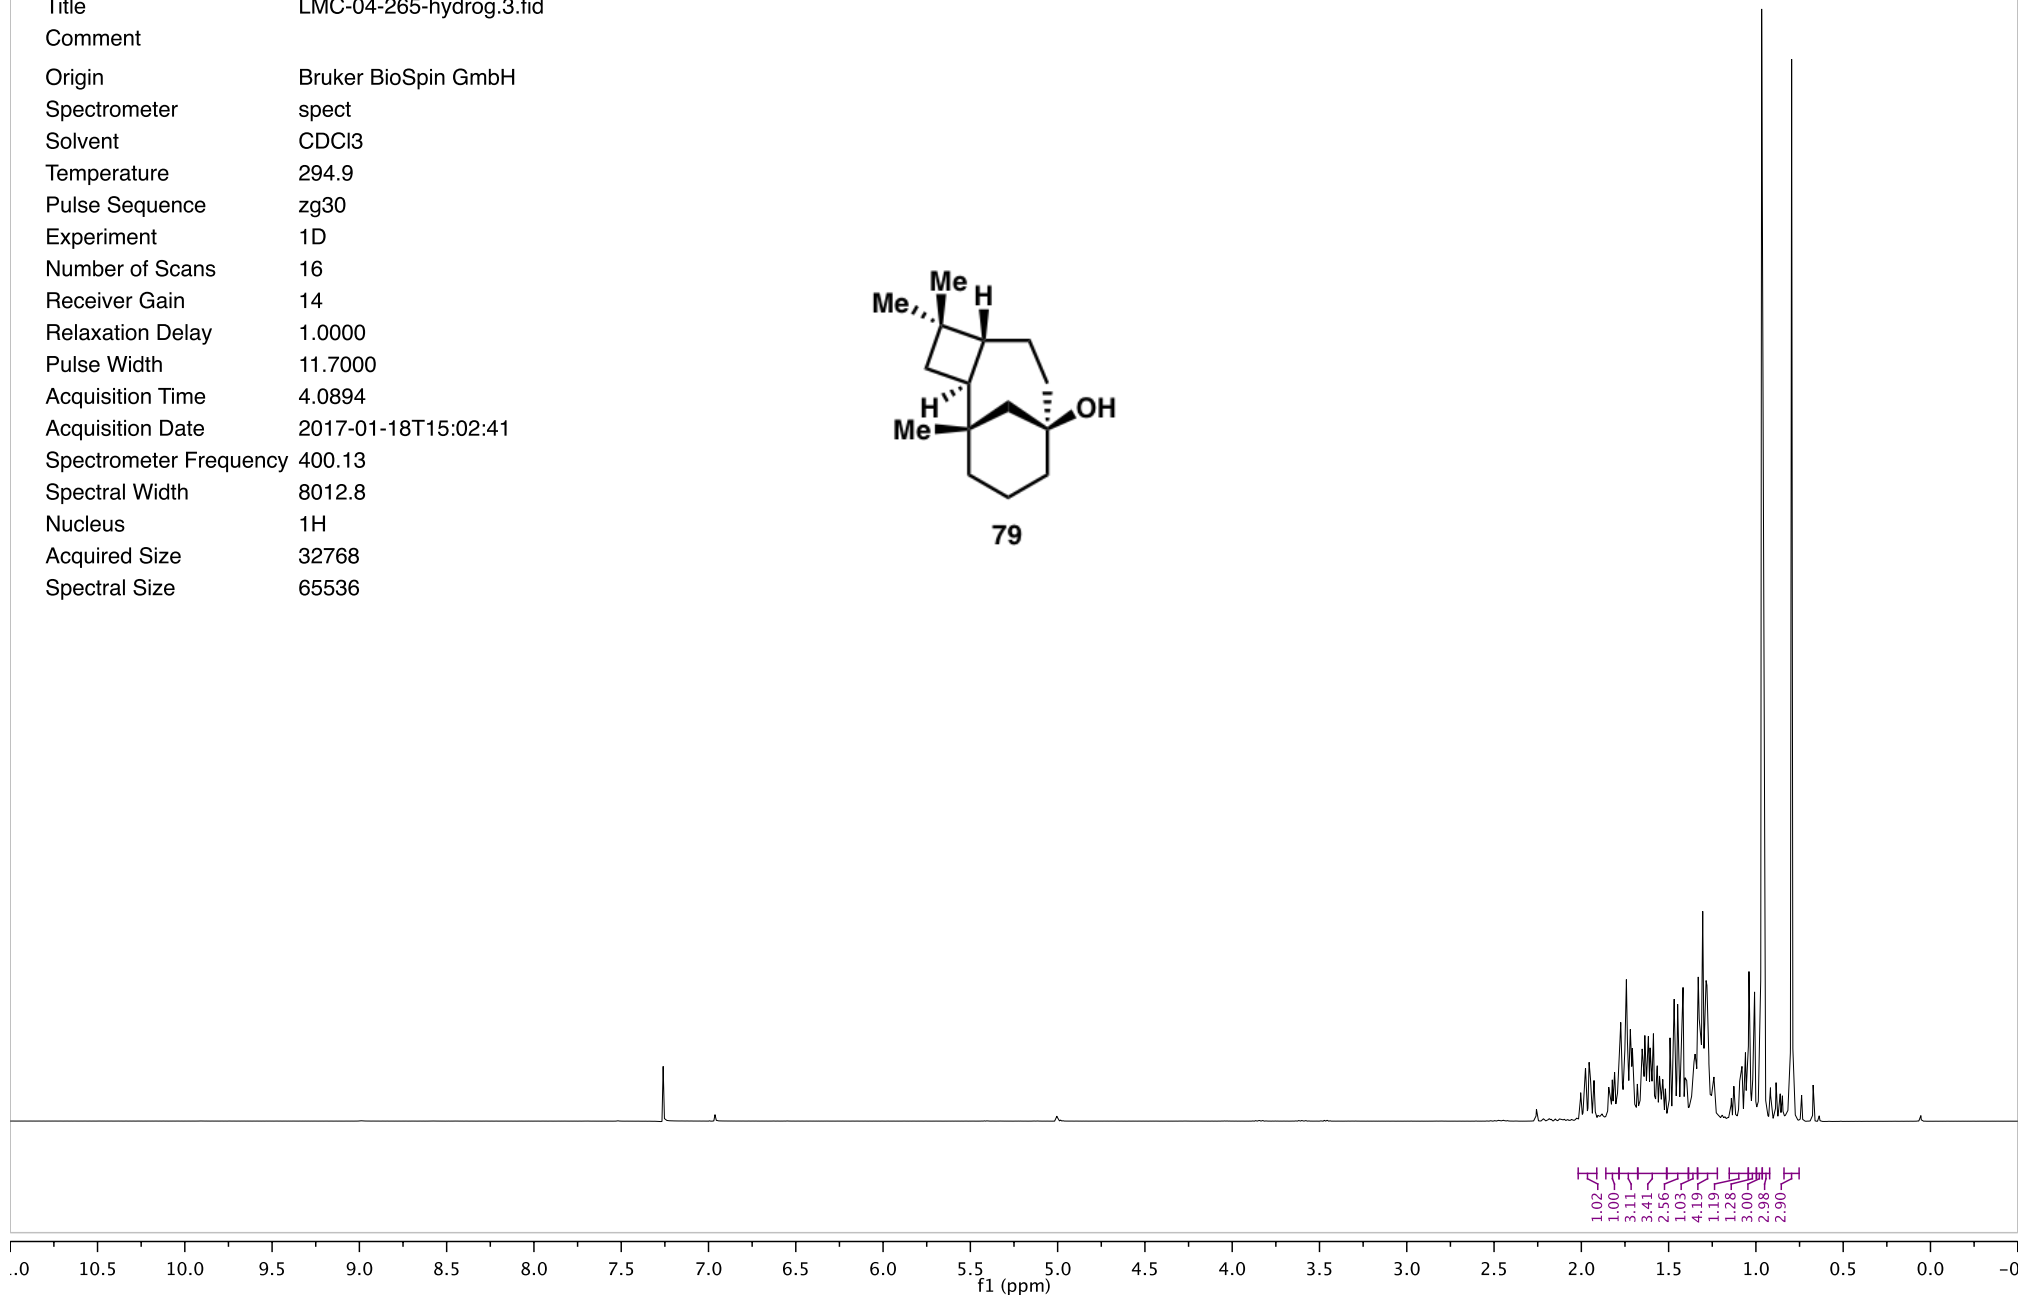

| Parameter              | Value                                                        |
|------------------------|--------------------------------------------------------------|
| Data File Name         | / Volumes/ nmrdata/ lchapman/ nmr/ LMC-04-265-hydrog/ 2/ fid |
| Title                  | LMC-04-265-hydrog.2.fid                                      |
| Comment                |                                                              |
| Origin                 | Bruker BioSpin GmbH                                          |
| Spectrometer           | spect                                                        |
| Solvent                | CDCl3                                                        |
| Temperature            | 295.0                                                        |
| Pulse Sequence         | zgpg30                                                       |
| Experiment             | 1D                                                           |
| Number of Scans        | 128                                                          |
| Receiver Gain          | 79                                                           |
| Relaxation Delay       | 2.0000                                                       |
| Pulse Width            | 10.0000                                                      |
| Acquisition Time       | 1.3631                                                       |
| Acquisition Date       | 2017-01-18T15:00:06                                          |
| Spectrometer Frequency | 100.62                                                       |
| Spectral Width         | 24038.5                                                      |
| Nucleus                | 13C                                                          |
| Acquired Size          | 32768                                                        |
| Spectral Size          | 65536                                                        |

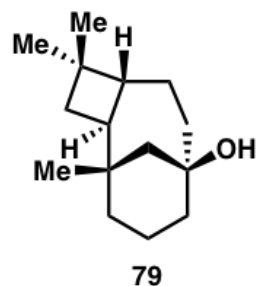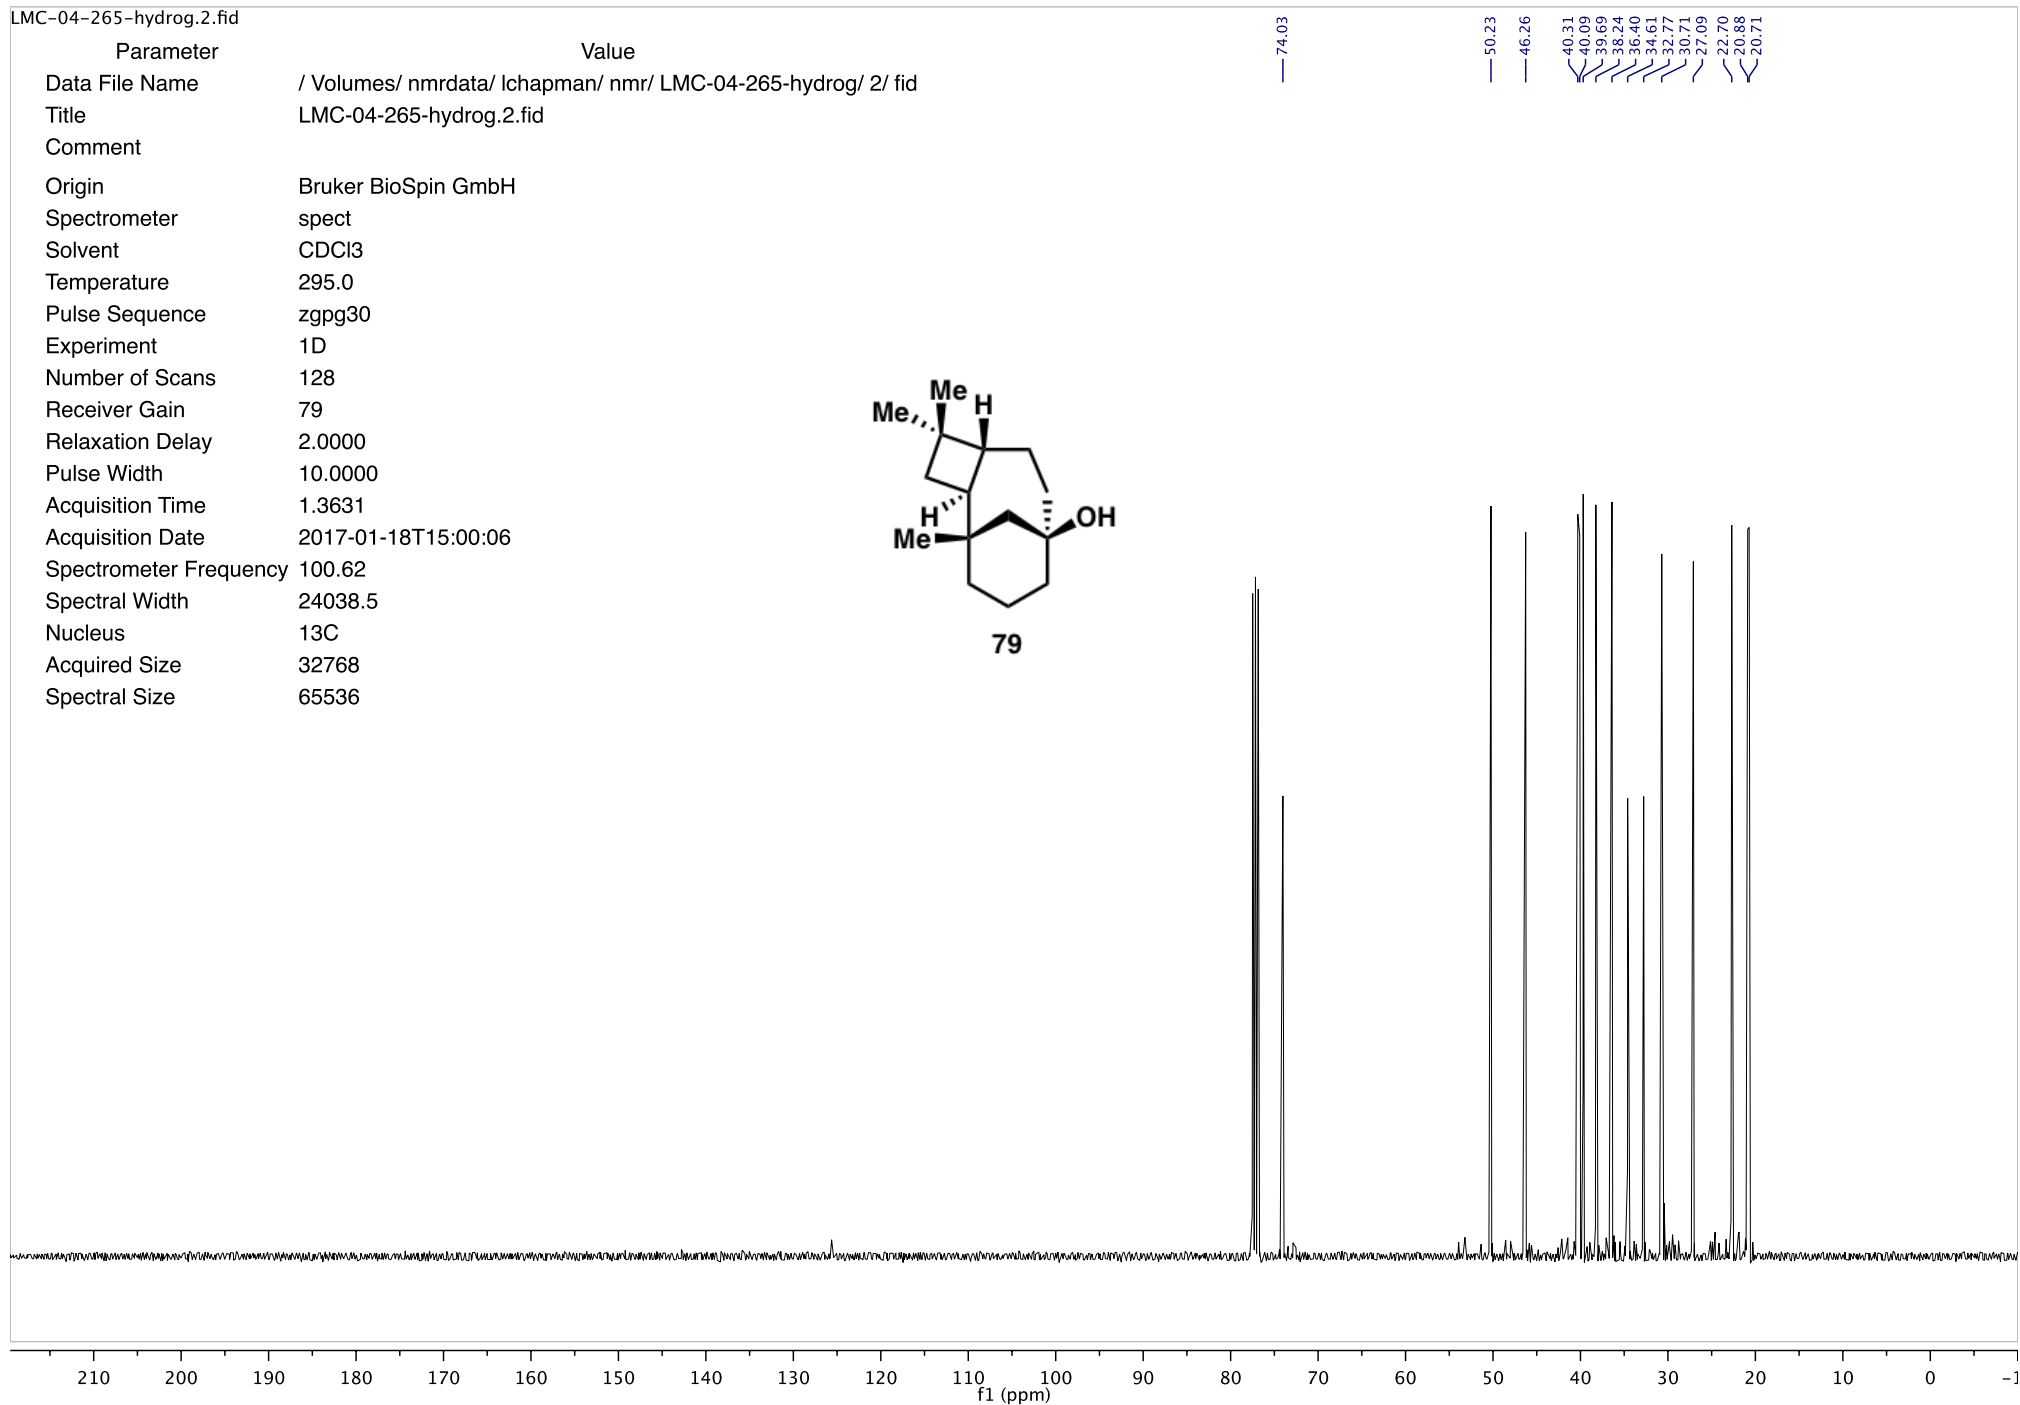

LMC-04-79-char.1.fid

| Parameter              | Value                                                     |
|------------------------|-----------------------------------------------------------|
| Data File Name         | / Volumes/ nmrdata/ lchapman/ nmr/ LMC-04-79-char/ 1/ fid |
| Title                  | LMC-04-79-char.1.fid                                      |
| Origin                 | Bruker BioSpin GmbH                                       |
| Spectrometer           | spect                                                     |
| Solvent                | CDCl3                                                     |
| Temperature            | 295.0                                                     |
| Pulse Sequence         | zg30                                                      |
| Experiment             | 1D                                                        |
| Number of Scans        | 16                                                        |
| Receiver Gain          | 197                                                       |
| Relaxation Delay       | 10.0000                                                   |
| Pulse Width            | 11.7000                                                   |
| Acquisition Time       | 4.0894                                                    |
| Acquisition Date       | 2016-11-10T00:38:17                                       |
| Spectrometer Frequency | 400.13                                                    |
| Spectral Width         | 8012.8                                                    |
| Nucleus                | 1H                                                        |
| Acquired Size          | 32768                                                     |
| Spectral Size          | 65536                                                     |

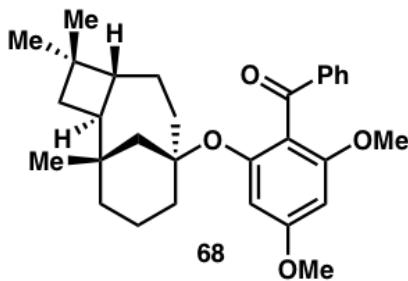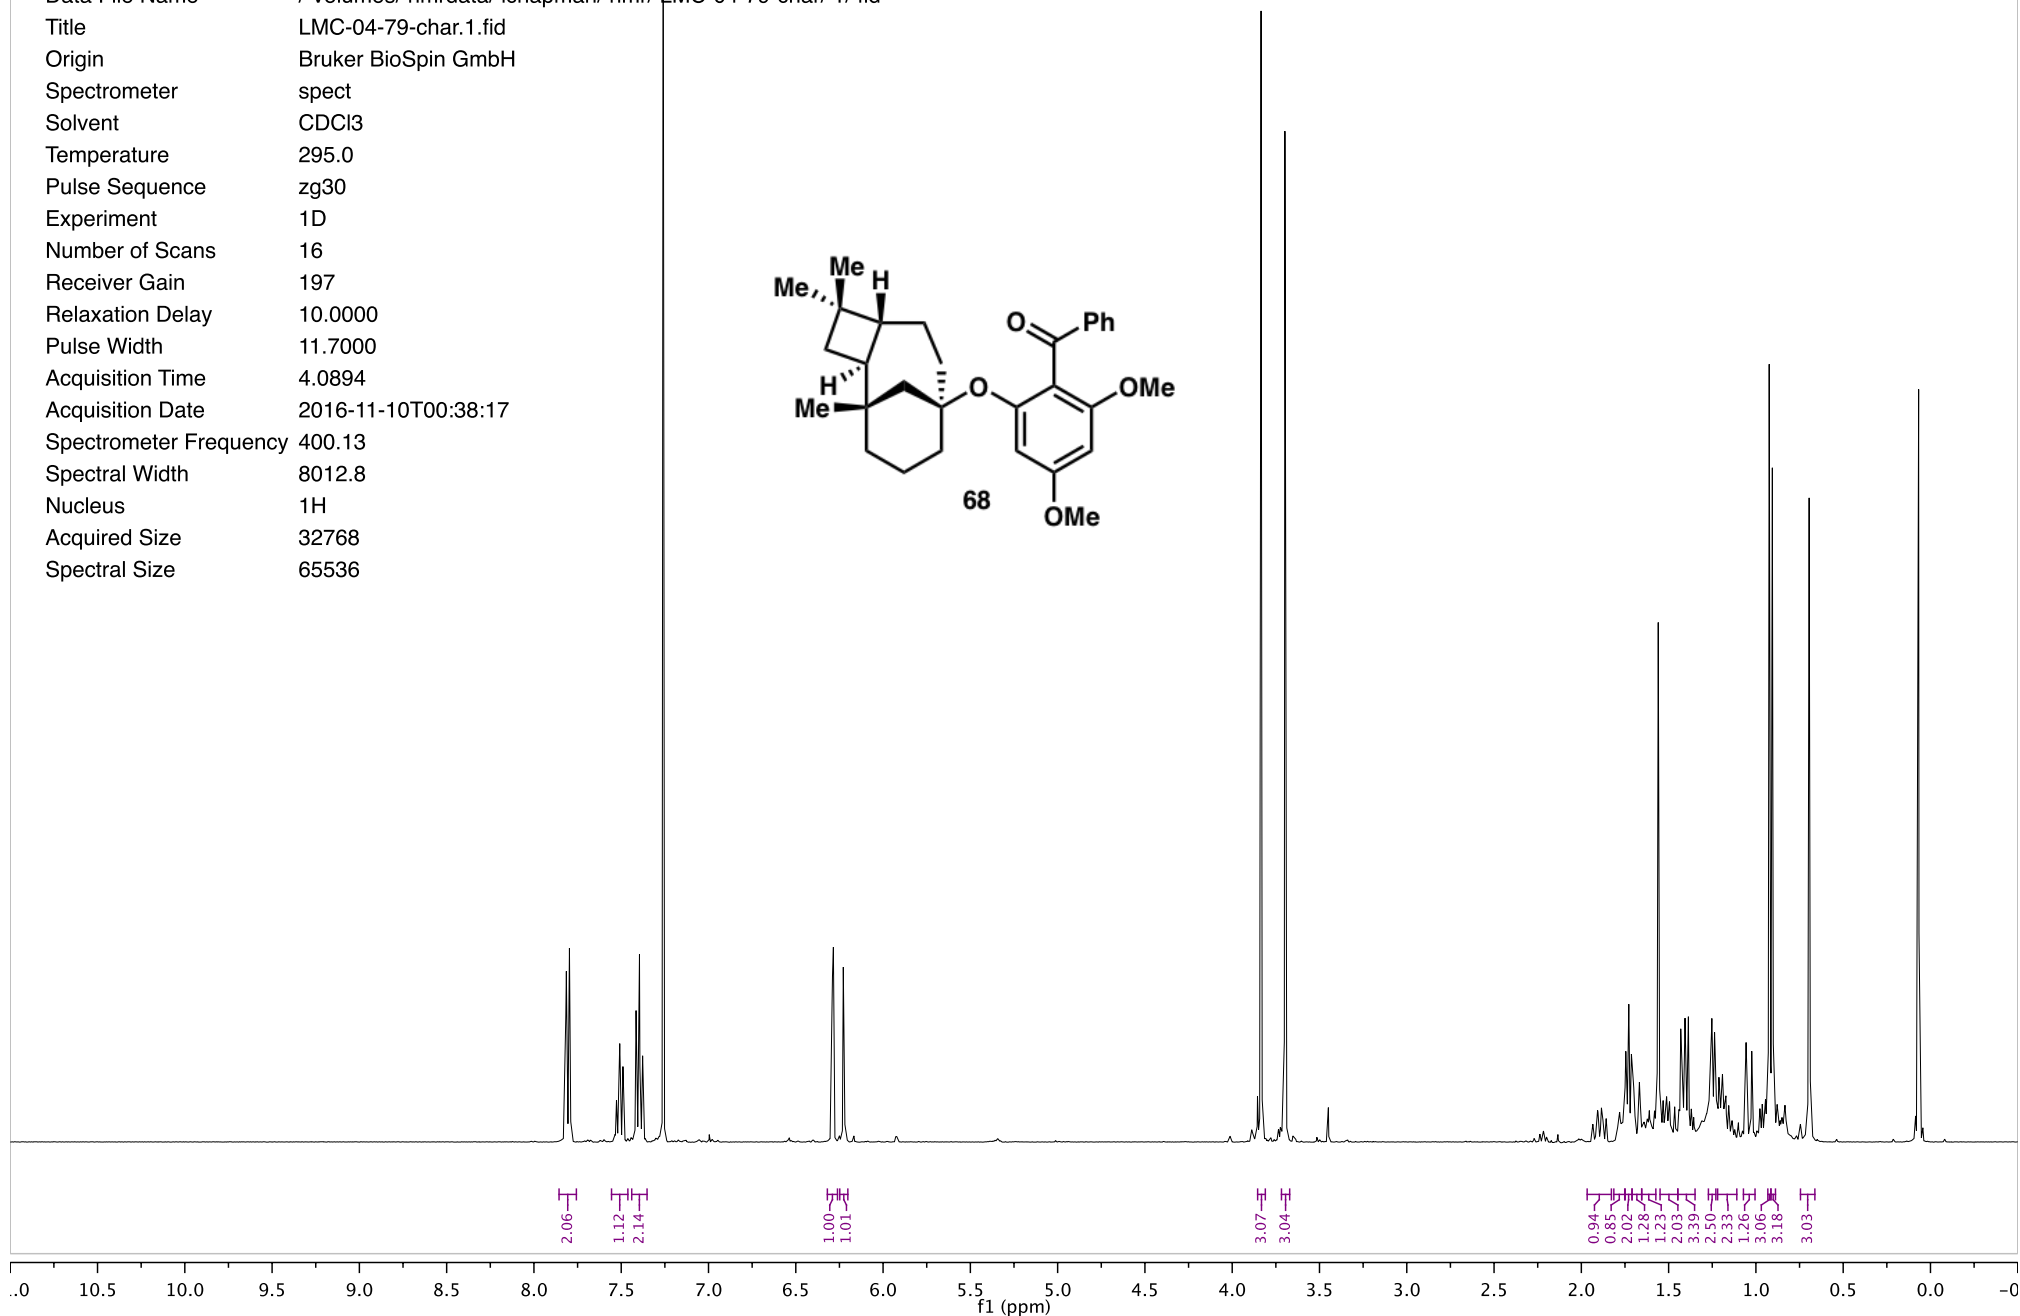

Parameter Value

Data File Name / Volumes/ nmrdata/ lchapman/ nmr/ LMC-04-267-pTLC/ 3/ fid

Title LMC-04-267-pTLC.3.fid

Origin Bruker BioSpin GmbH

Spectrometer spect

Solvent CDCl3

Temperature 295.0

Pulse Sequence zgpg30

Experiment 1D

Number of Scans 1024

Receiver Gain 64

Relaxation Delay 2.0000

Pulse Width 10.0000

Acquisition Time 1.3631

Acquisition Date 2017-01-21T02:30:53

Spectrometer Frequency 100.62

Spectral Width 24038.5

Nucleus 13C

Acquired Size 32768

Spectral Size 65536

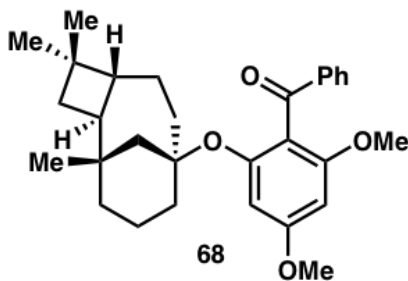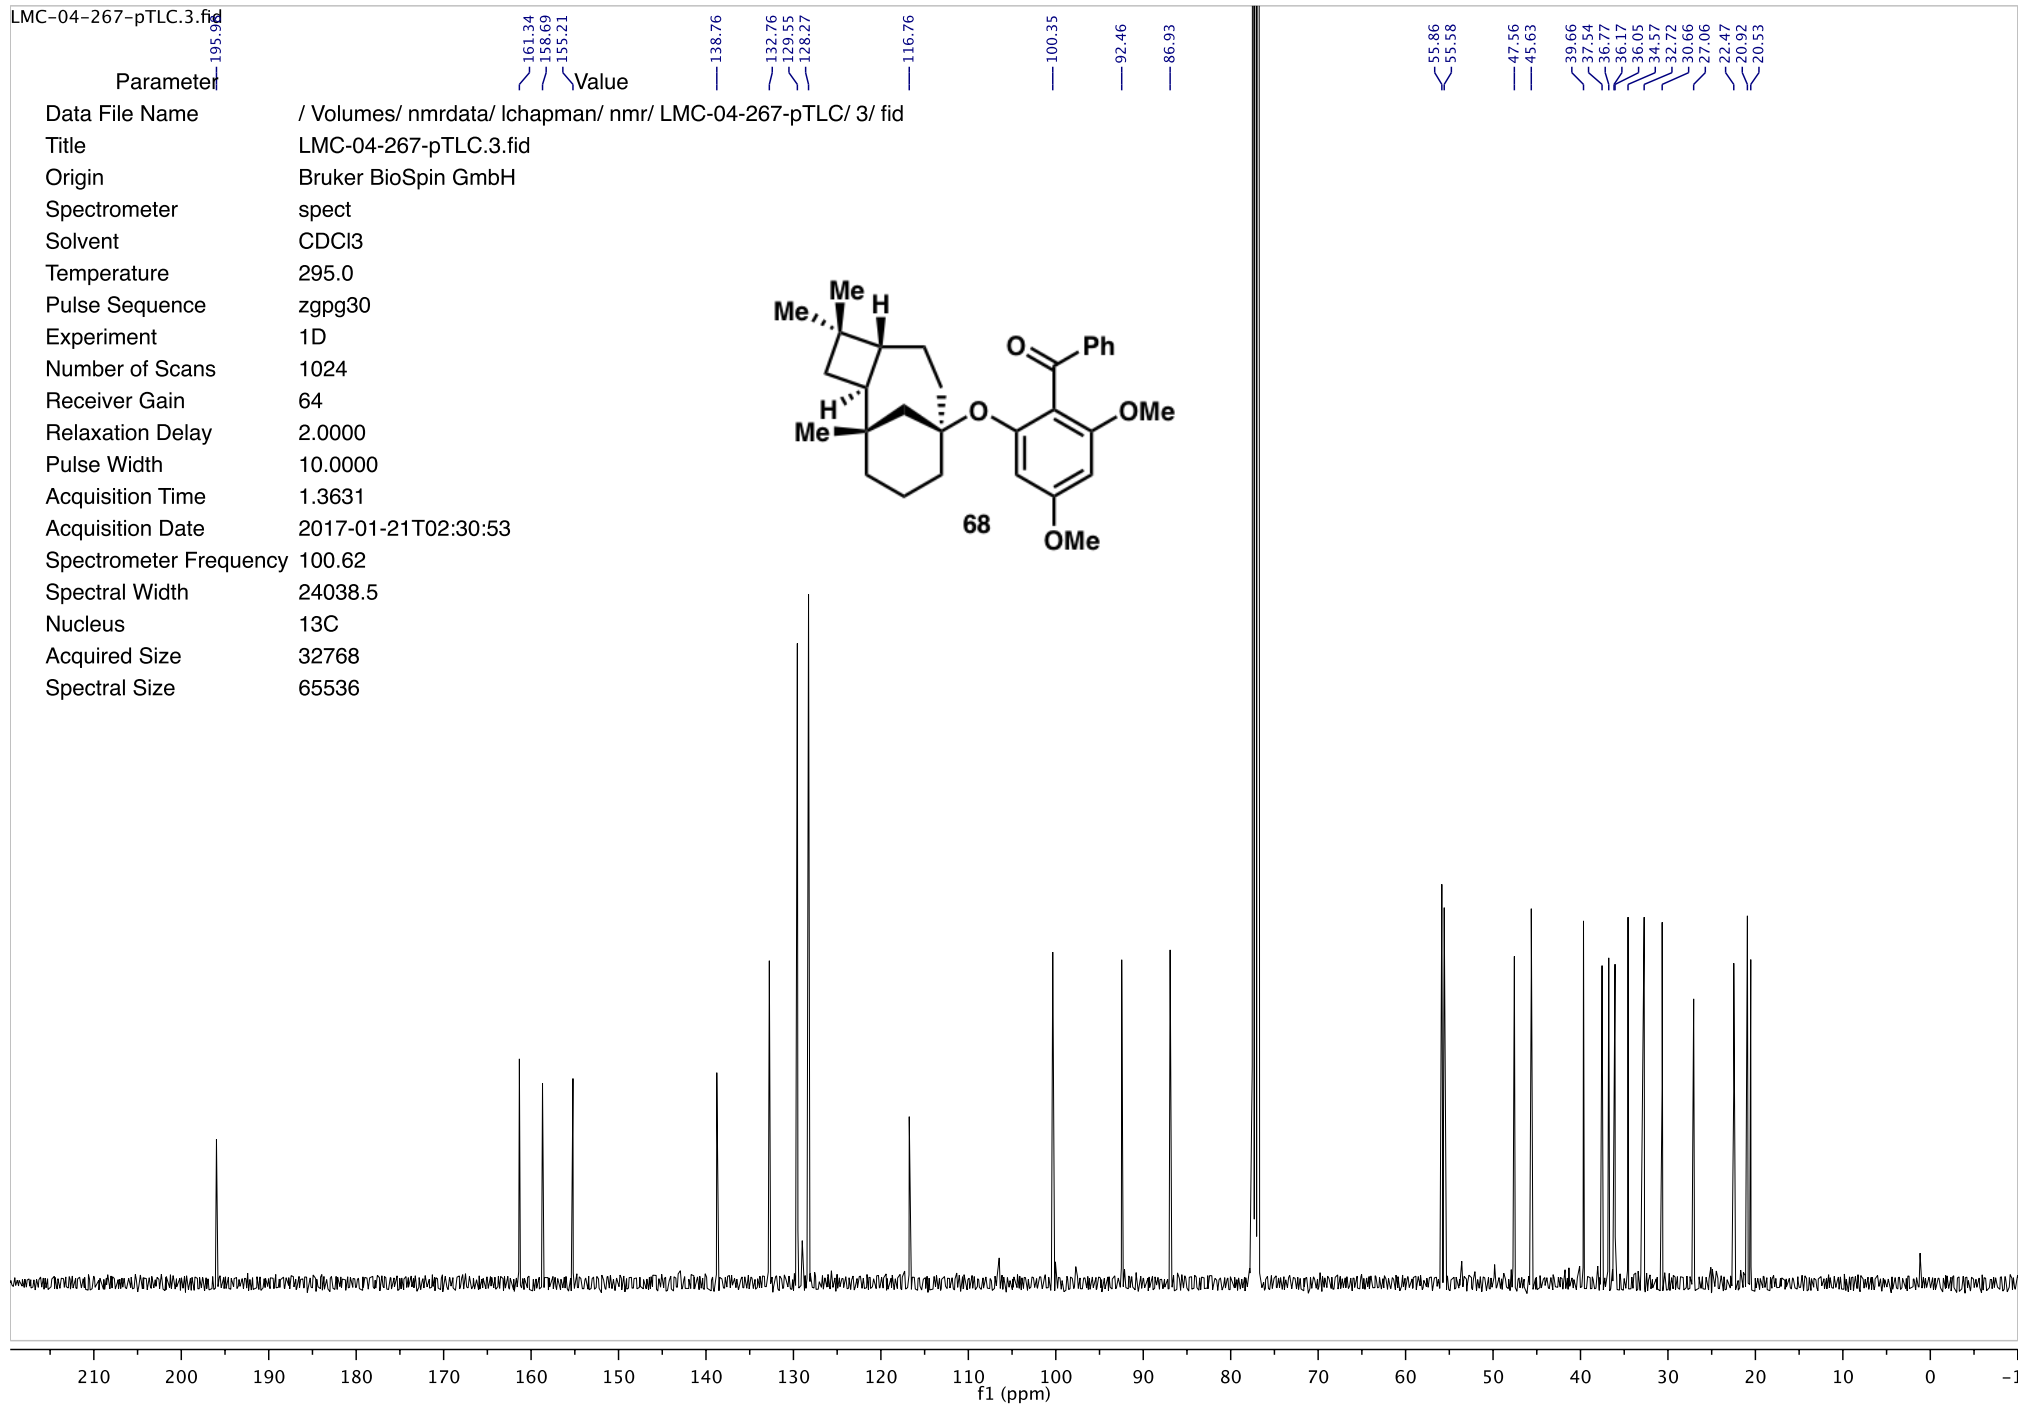

LMC-04-278-P3-HMBC.1.fid

| Parameter              | Value                                                         |
|------------------------|---------------------------------------------------------------|
| Data File Name         | / Volumes/ nmrdata/ lchapman/ nmr/ LMC-04-278-P3-HMBC/ 1/ fid |
| Title                  | LMC-04-278-P3-HMBC.1.fid                                      |
| Origin                 | Bruker BioSpin GmbH                                           |
| Spectrometer           | spect                                                         |
| Solvent                | CDCl3                                                         |
| Temperature            | 294.9                                                         |
| Pulse Sequence         | zg30                                                          |
| Experiment             | 1D                                                            |
| Number of Scans        | 16                                                            |
| Receiver Gain          | 197                                                           |
| Relaxation Delay       | 1.0000                                                        |
| Pulse Width            | 11.7000                                                       |
| Acquisition Time       | 4.0894                                                        |
| Acquisition Date       | 2017-04-17T21:40:33                                           |
| Spectrometer Frequency | 400.13                                                        |
| Spectral Width         | 8012.8                                                        |
| Nucleus                | 1H                                                            |
| Acquired Size          | 32768                                                         |
| Spectral Size          | 65536                                                         |

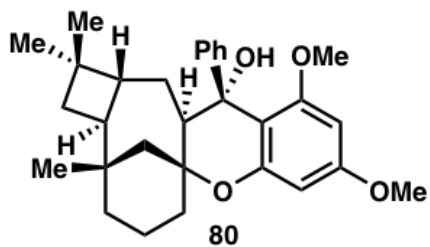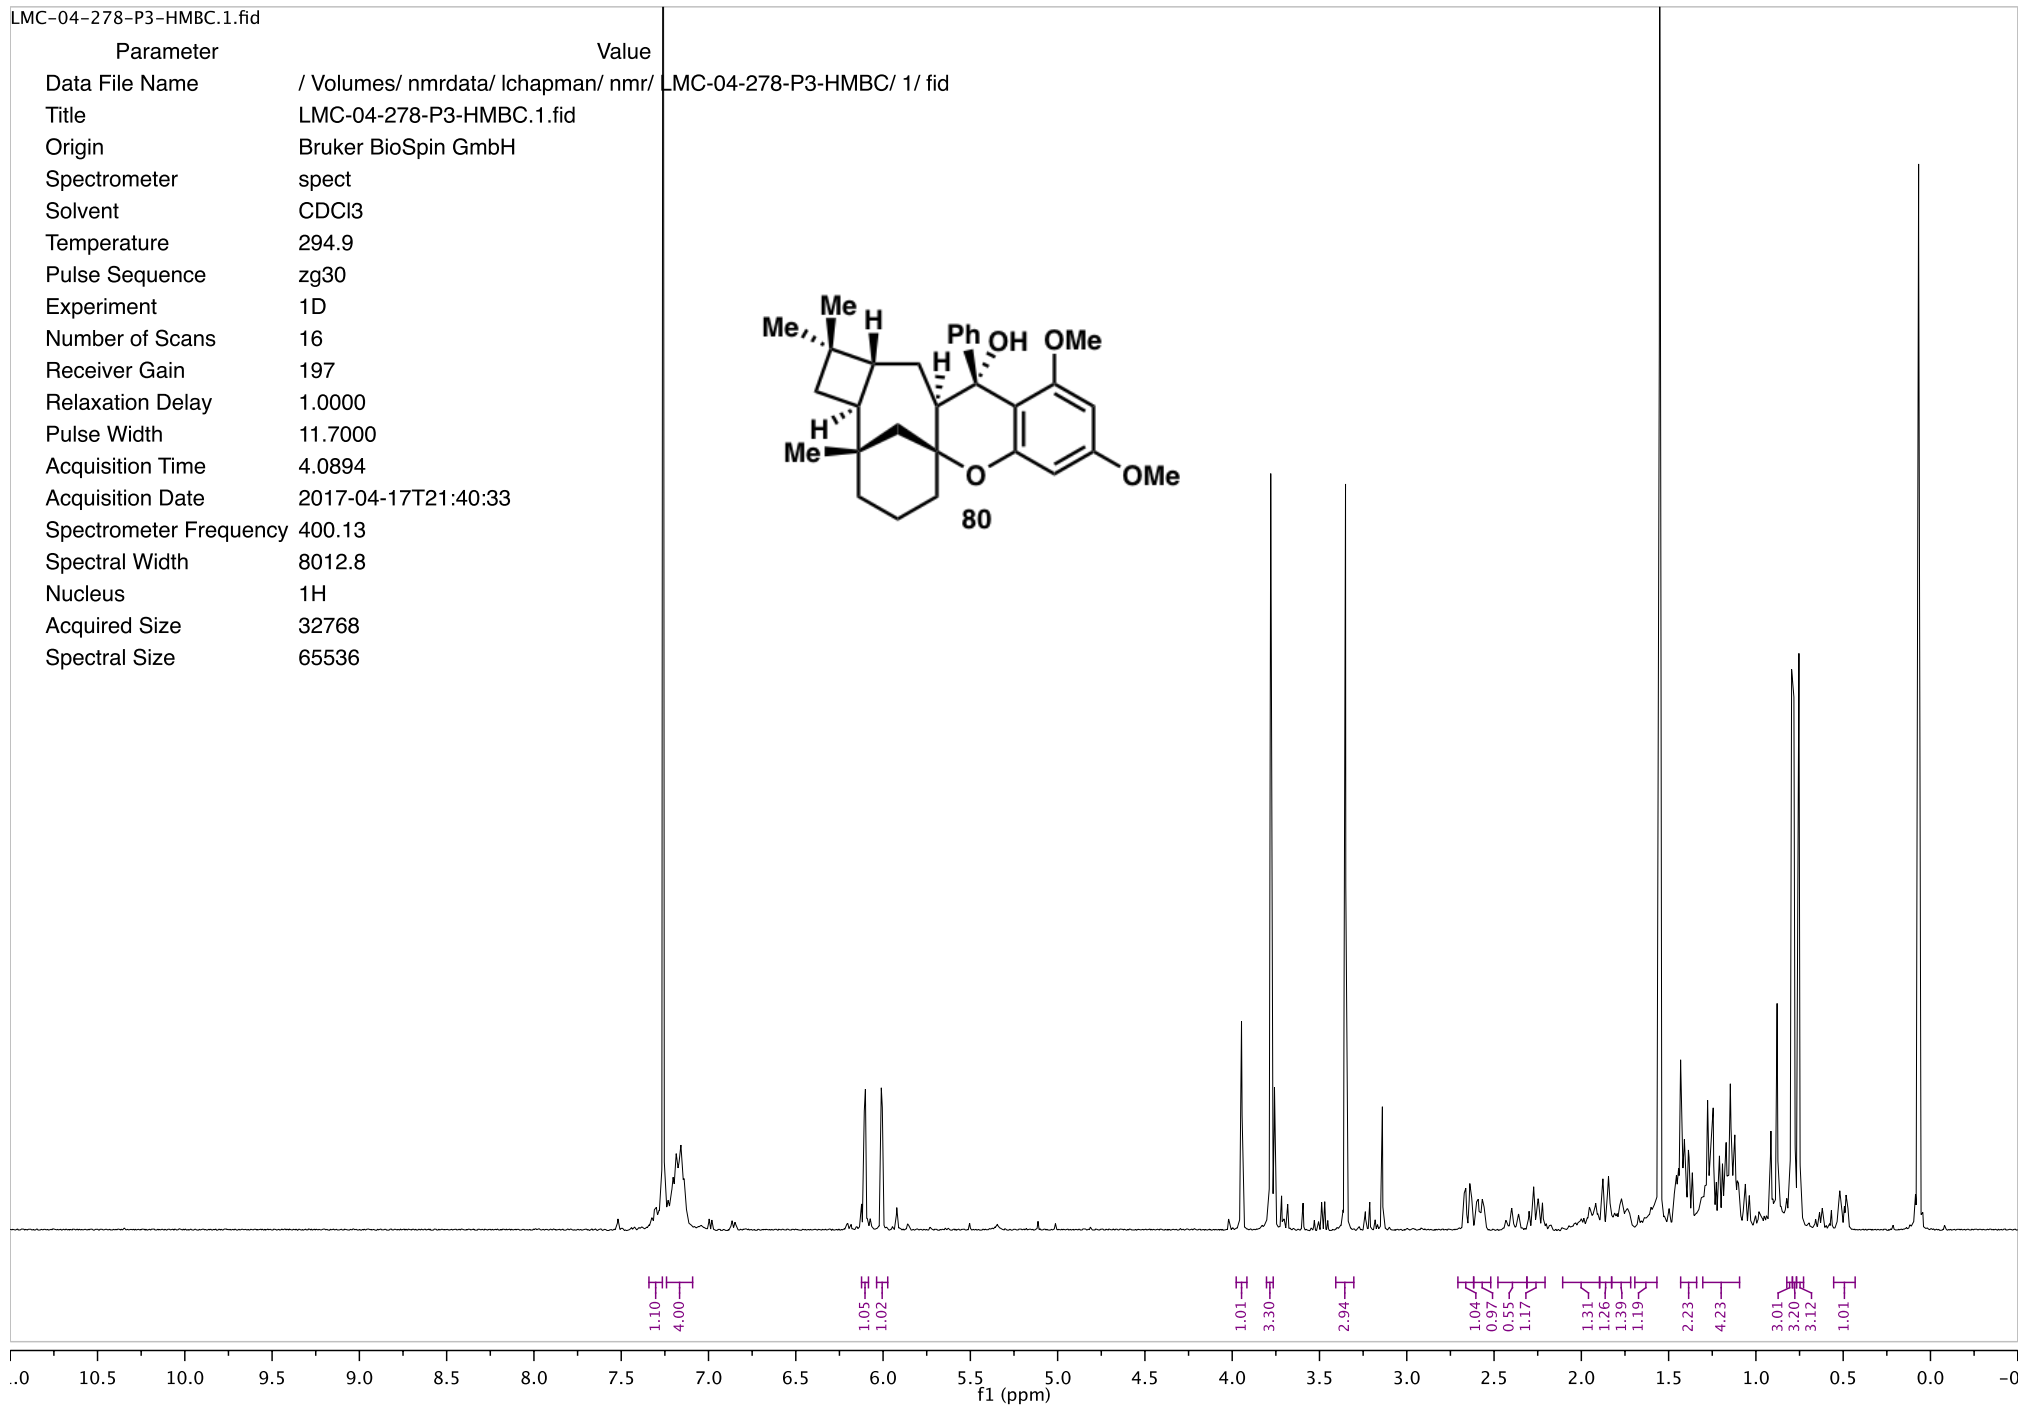



Parameter

|                        |                                                             |
|------------------------|-------------------------------------------------------------|
| Data File Name         | / Volumes/ nmrdata/ lchapman/ nmr/ LMC-04-278-P3-2D/ 1/ fid |
| Title                  | LMC-04-278-P3-2D.1.fid                                      |
| Origin                 | Bruker BioSpin GmbH                                         |
| Spectrometer           | spect                                                       |
| Solvent                | CDCl3                                                       |
| Temperature            | 294.9                                                       |
| Pulse Sequence         | zgpg30                                                      |
| Experiment             | 1D                                                          |
| Number of Scans        | 5200                                                        |
| Receiver Gain          | 55                                                          |
| Relaxation Delay       | 2.0000                                                      |
| Pulse Width            | 10.0000                                                     |
| Acquisition Time       | 1.3631                                                      |
| Acquisition Date       | 2017-04-16T04:03:34                                         |
| Spectrometer Frequency | 100.62                                                      |
| Spectral Width         | 24038.5                                                     |
| Nucleus                | 13C                                                         |
| Acquired Size          | 32768                                                       |
| Spectral Size          | 65536                                                       |

|        |        |        |        |        |        |        |        |       |       |       |       |       |       |       |       |       |       |       |       |       |       |       |       |       |       |       |       |
|--------|--------|--------|--------|--------|--------|--------|--------|-------|-------|-------|-------|-------|-------|-------|-------|-------|-------|-------|-------|-------|-------|-------|-------|-------|-------|-------|-------|
| 160.55 | 158.76 | 154.31 | 149.28 | 127.36 | 126.13 | 123.81 | 111.44 | 94.17 | 93.54 | 80.58 | 74.61 | 55.64 | 55.42 | 48.50 | 48.09 | 44.04 | 37.26 | 36.83 | 35.66 | 35.46 | 34.60 | 33.24 | 30.54 | 26.41 | 24.96 | 20.65 | 20.42 |
|        |        |        |        |        |        |        |        |       |       |       |       |       |       |       |       |       |       |       |       |       |       |       |       |       |       |       |       |
|        |        | Value  |        |        |        |        |        |       |       |       |       |       |       |       |       |       |       |       |       |       |       |       |       |       |       |       |       |

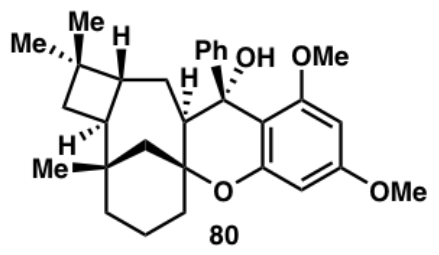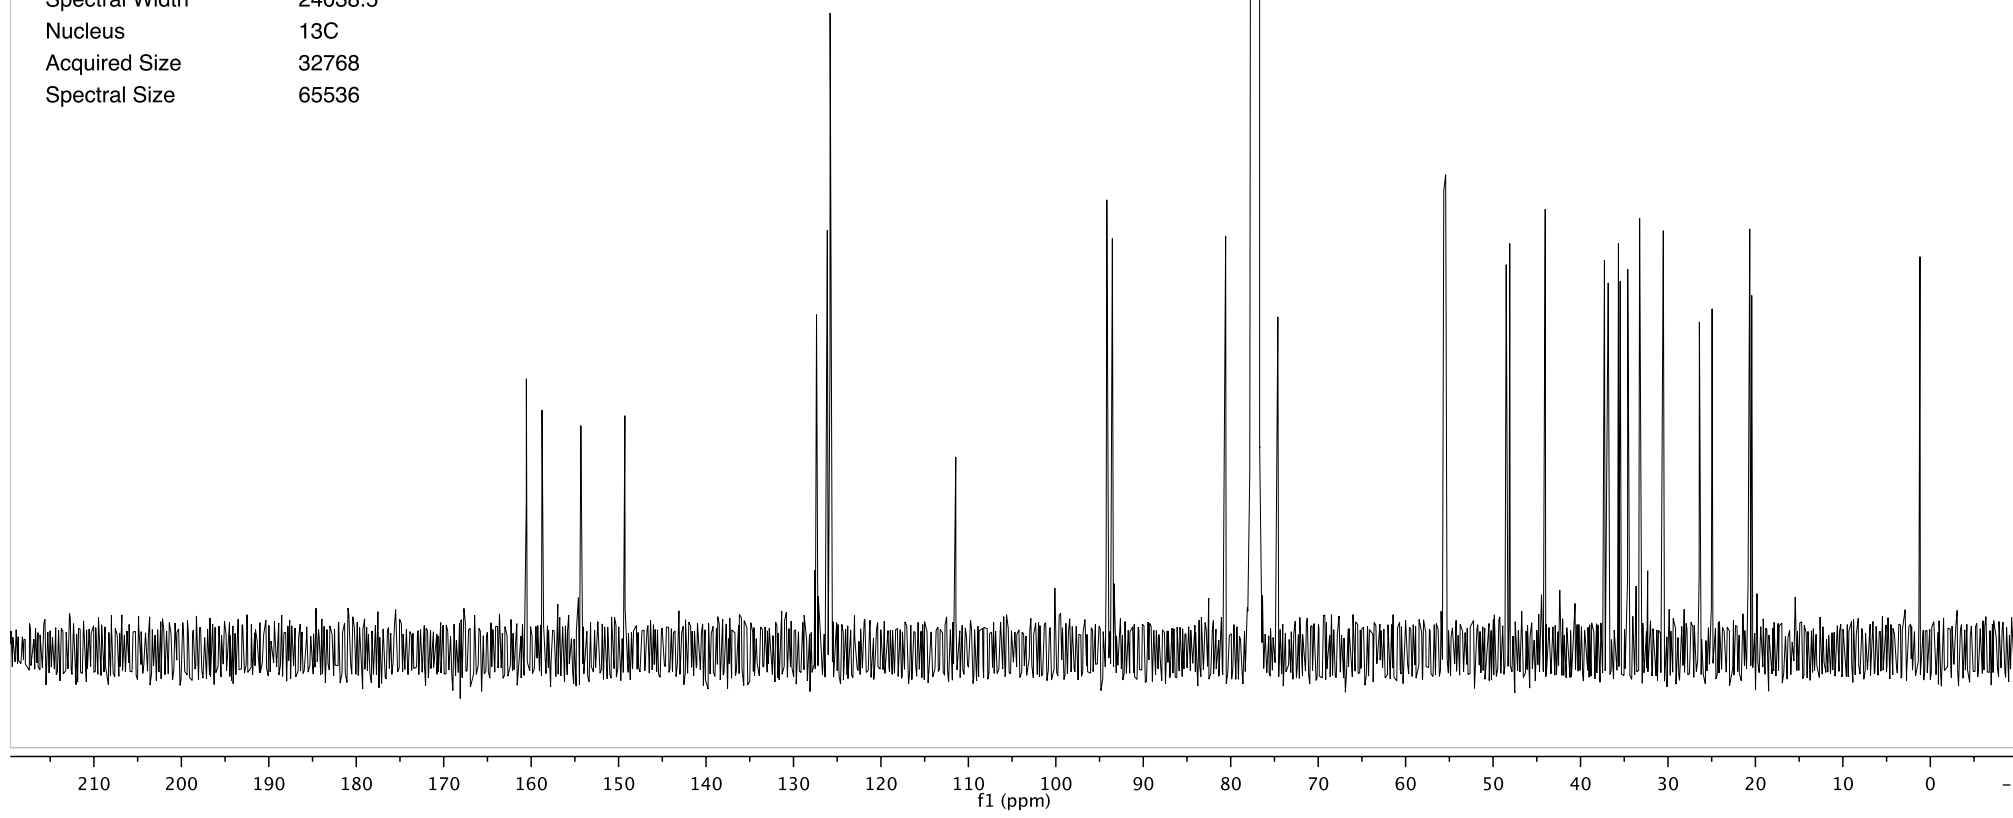

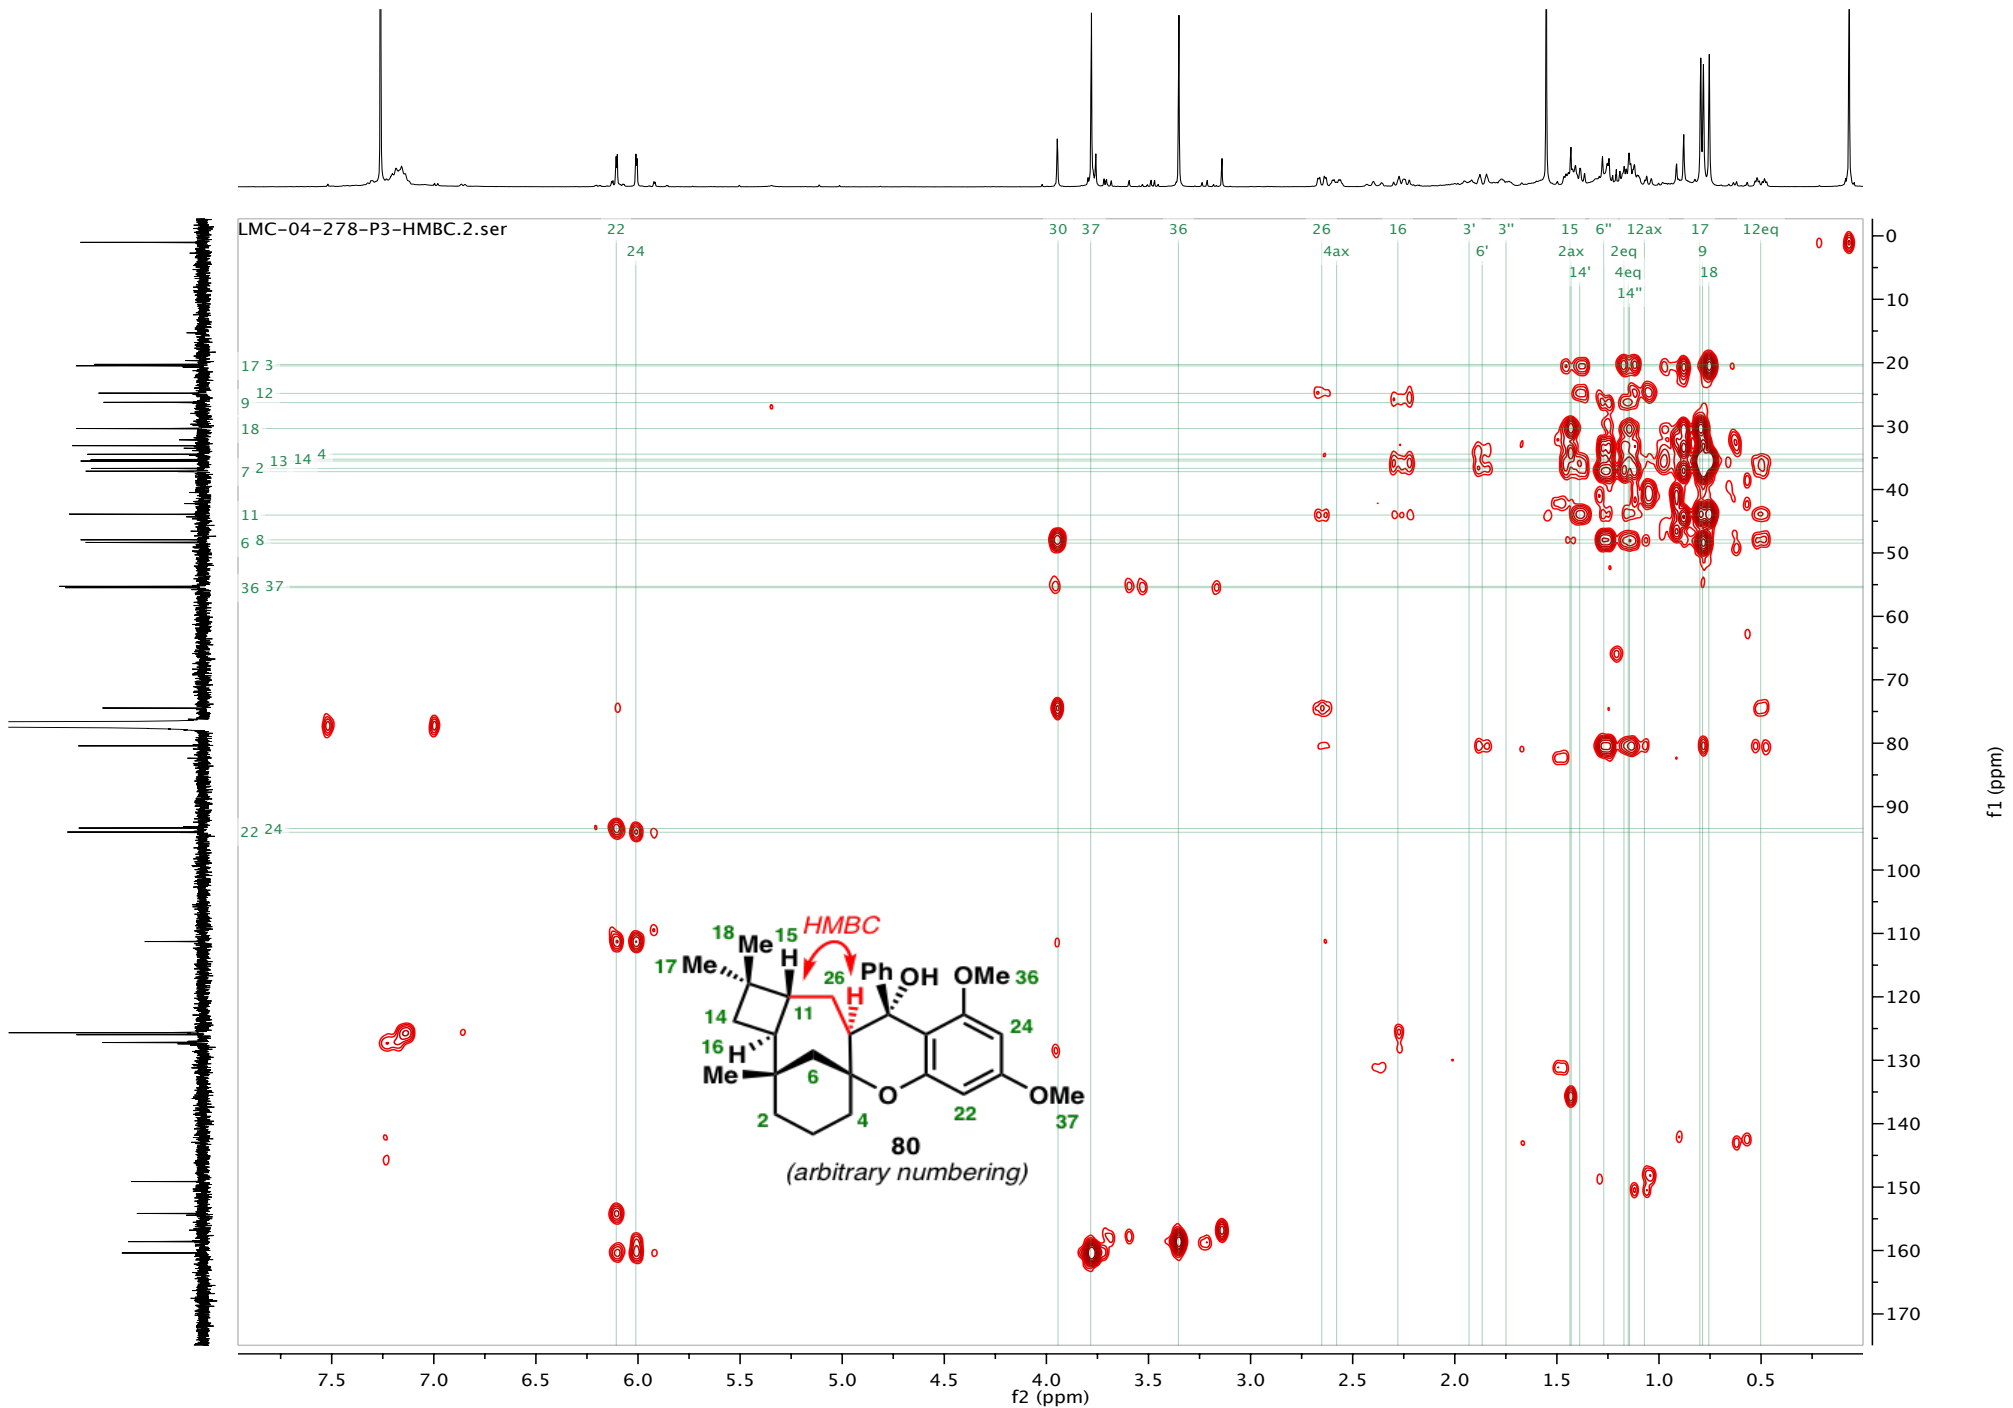

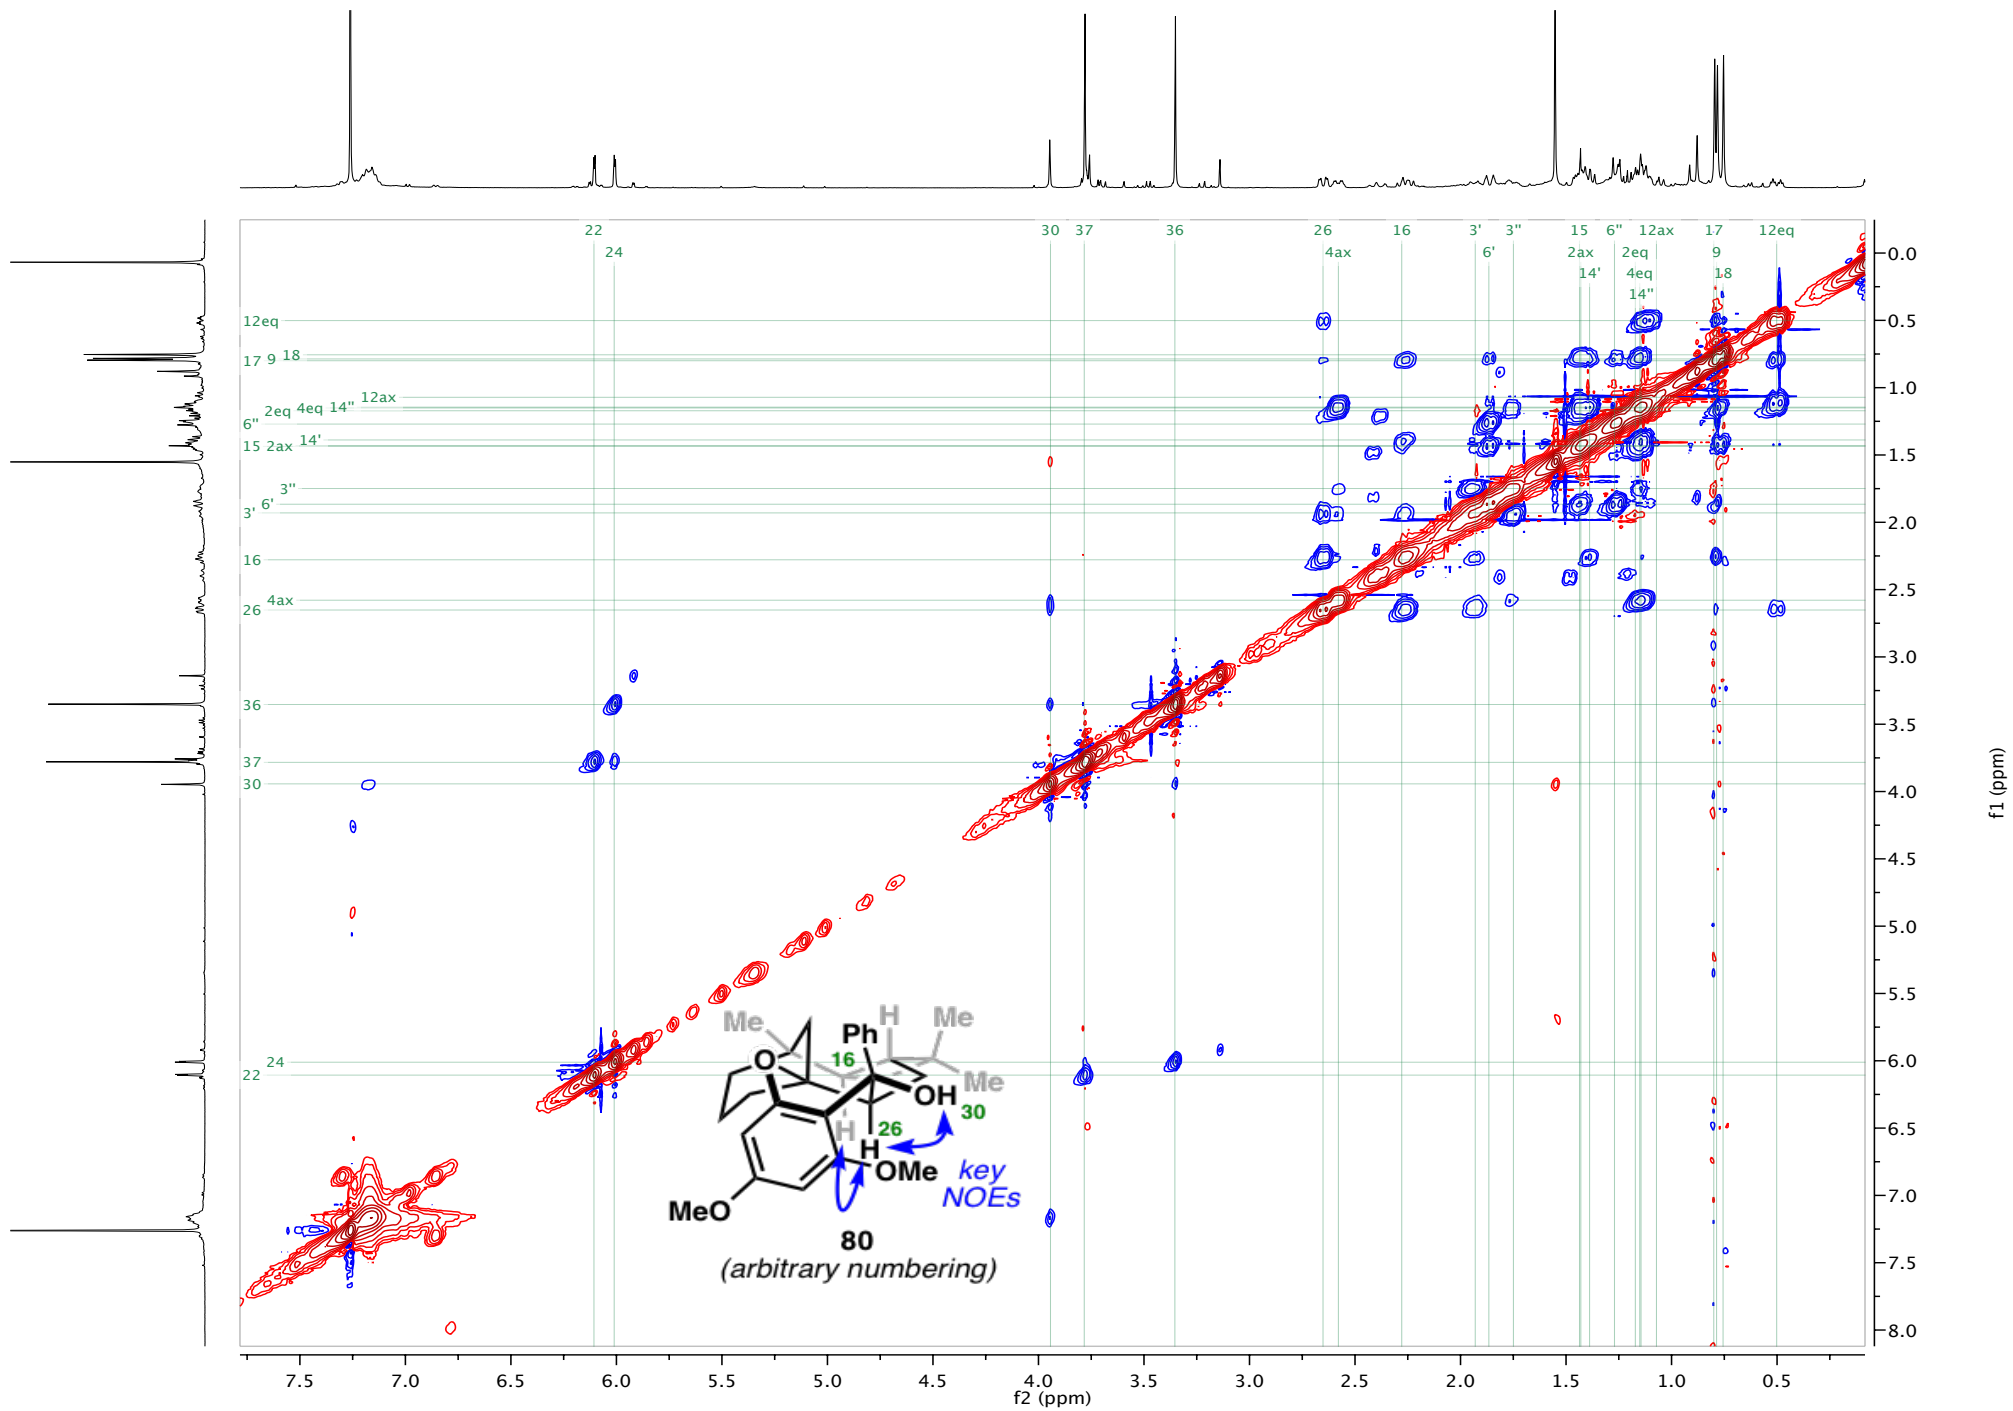

| Parameter              | Value                                                       |
|------------------------|-------------------------------------------------------------|
| Data File Name         | / Volumes/ nmrdata/ lchapman/ nmr/ LMC-04-214-flash/ 2/ fid |
| Title                  | LMC-04-214-flash.2.fid                                      |
| Comment                |                                                             |
| Origin                 | Bruker BioSpin GmbH                                         |
| Spectrometer           | spect                                                       |
| Solvent                | CDCl3                                                       |
| Temperature            | 295.0                                                       |
| Pulse Sequence         | zg30                                                        |
| Experiment             | 1D                                                          |
| Number of Scans        | 16                                                          |
| Receiver Gain          | 143                                                         |
| Relaxation Delay       | 10.0000                                                     |
| Pulse Width            | 11.7000                                                     |
| Acquisition Time       | 4.0894                                                      |
| Acquisition Date       | 2016-07-02T16:29:45                                         |
| Spectrometer Frequency | 400.13                                                      |
| Spectral Width         | 8012.8                                                      |
| Nucleus                | 1H                                                          |
| Acquired Size          | 32768                                                       |
| Spectral Size          | 65536                                                       |

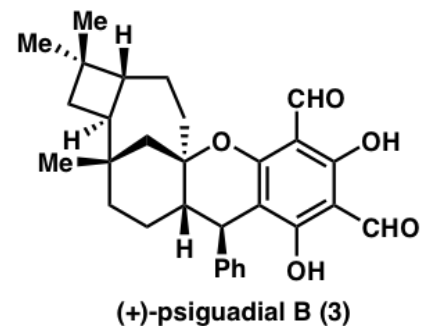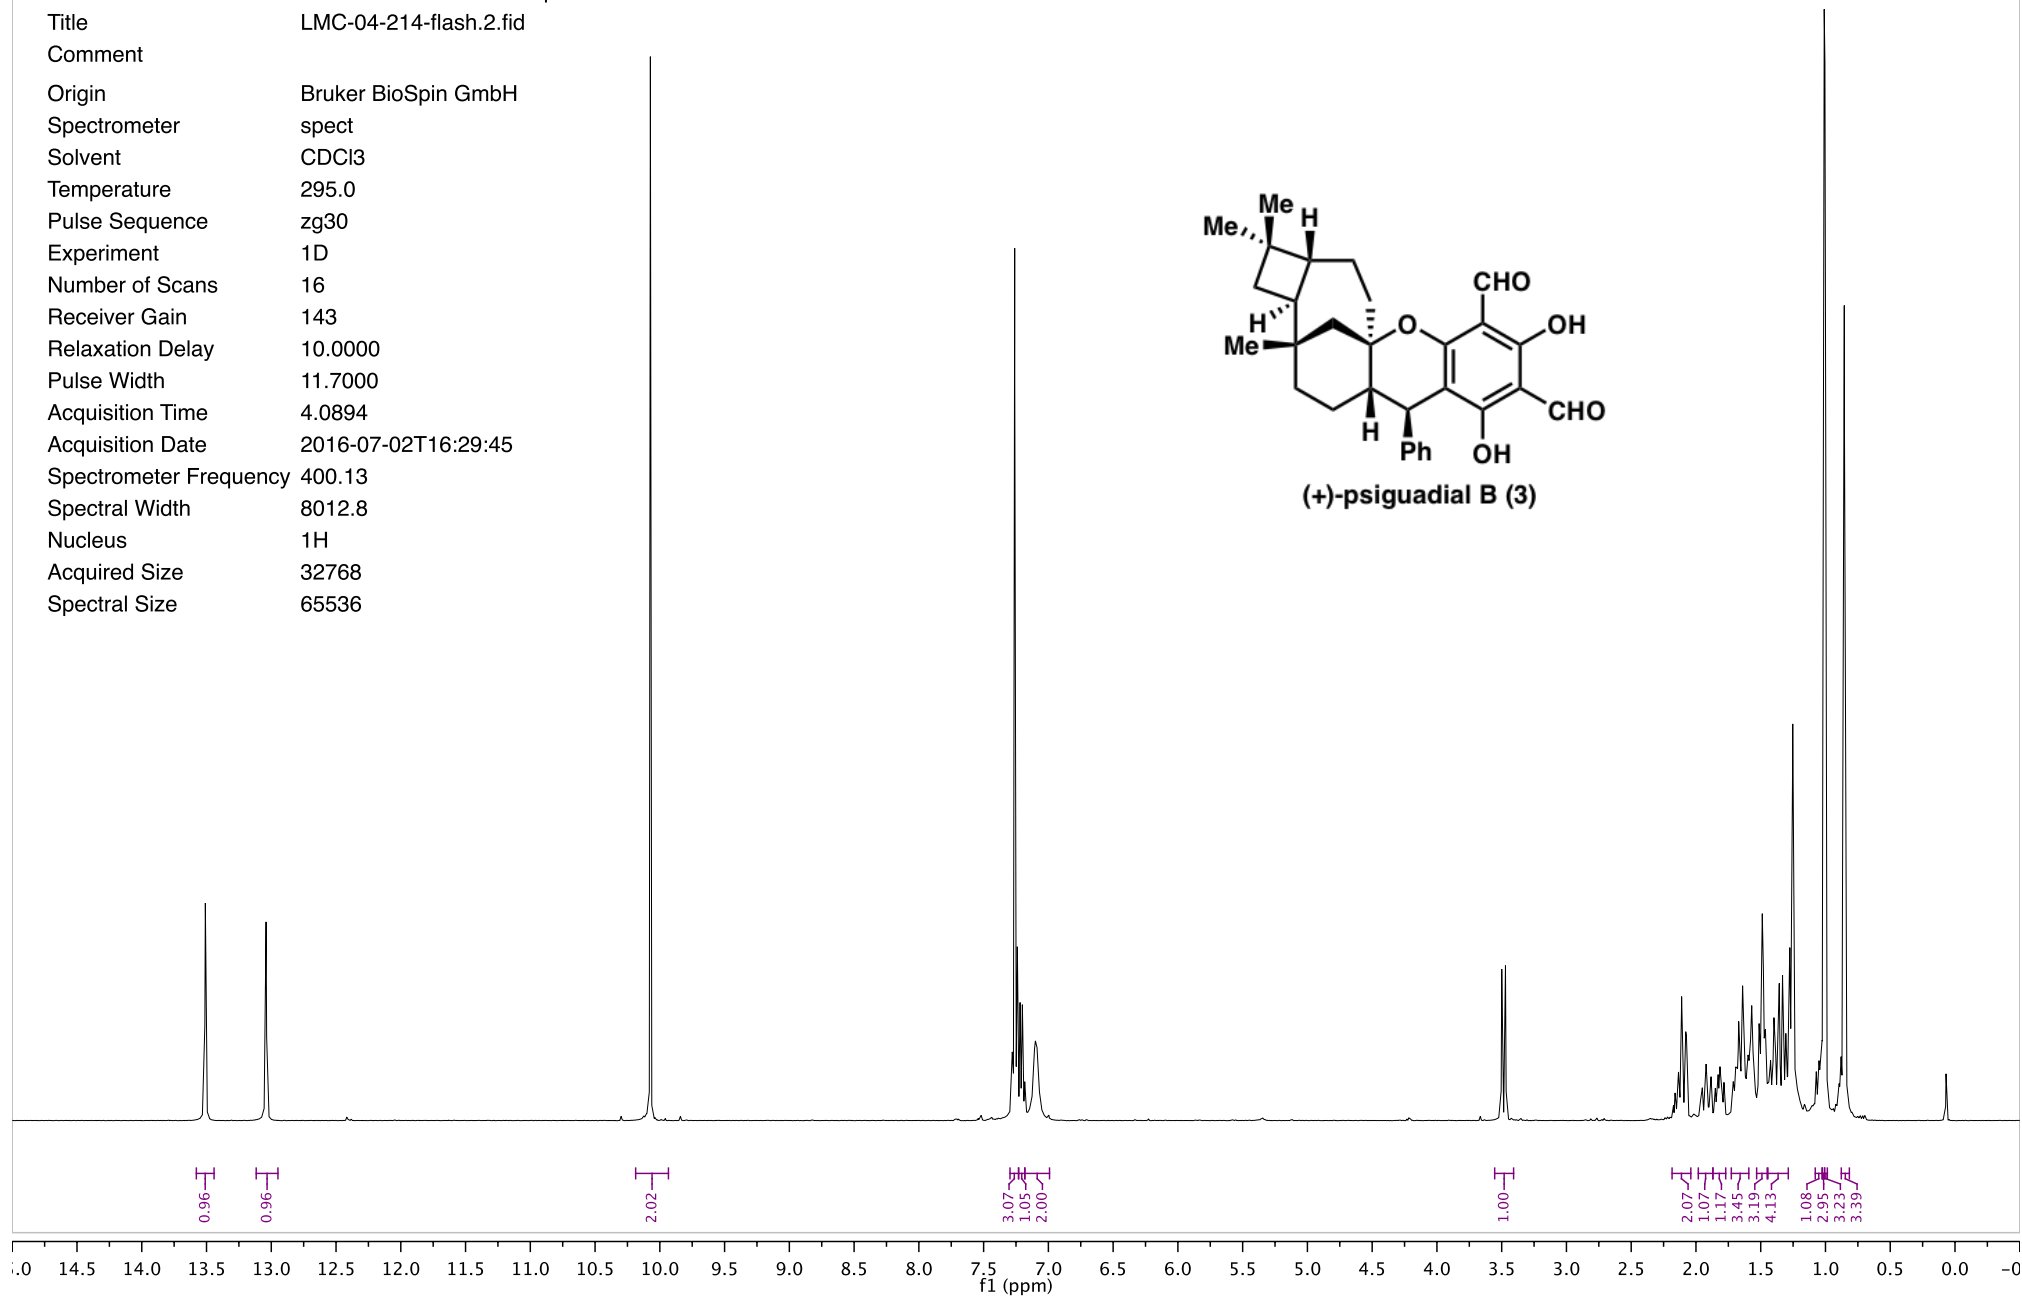

LMC-04-214-flash.3.fid

| Parameter              | Value                                                       |
|------------------------|-------------------------------------------------------------|
| Data File Name         | / Volumes/ nmrdata/ lchapman/ nmr/ LMC-04-214-flash/ 3/ fid |
| Title                  | LMC-04-214-flash.3.fid                                      |
| Comment                |                                                             |
| Origin                 | Bruker BioSpin GmbH                                         |
| Spectrometer           | spect                                                       |
| Solvent                | CDCl3                                                       |
| Temperature            | 294.9                                                       |
| Pulse Sequence         | zgpg30                                                      |
| Experiment             | 1D                                                          |
| Number of Scans        | 1024                                                        |
| Receiver Gain          | 72                                                          |
| Relaxation Delay       | 2.0000                                                      |
| Pulse Width            | 10.0000                                                     |
| Acquisition Time       | 1.3631                                                      |
| Acquisition Date       | 2016-07-02T17:28:52                                         |
| Spectrometer Frequency | 100.62                                                      |
| Spectral Width         | 24038.5                                                     |
| Nucleus                | 13C                                                         |
| Acquired Size          | 32768                                                       |
| Spectral Size          | 65536                                                       |

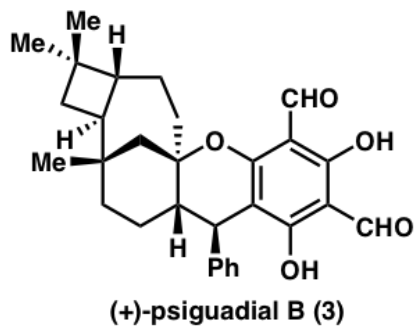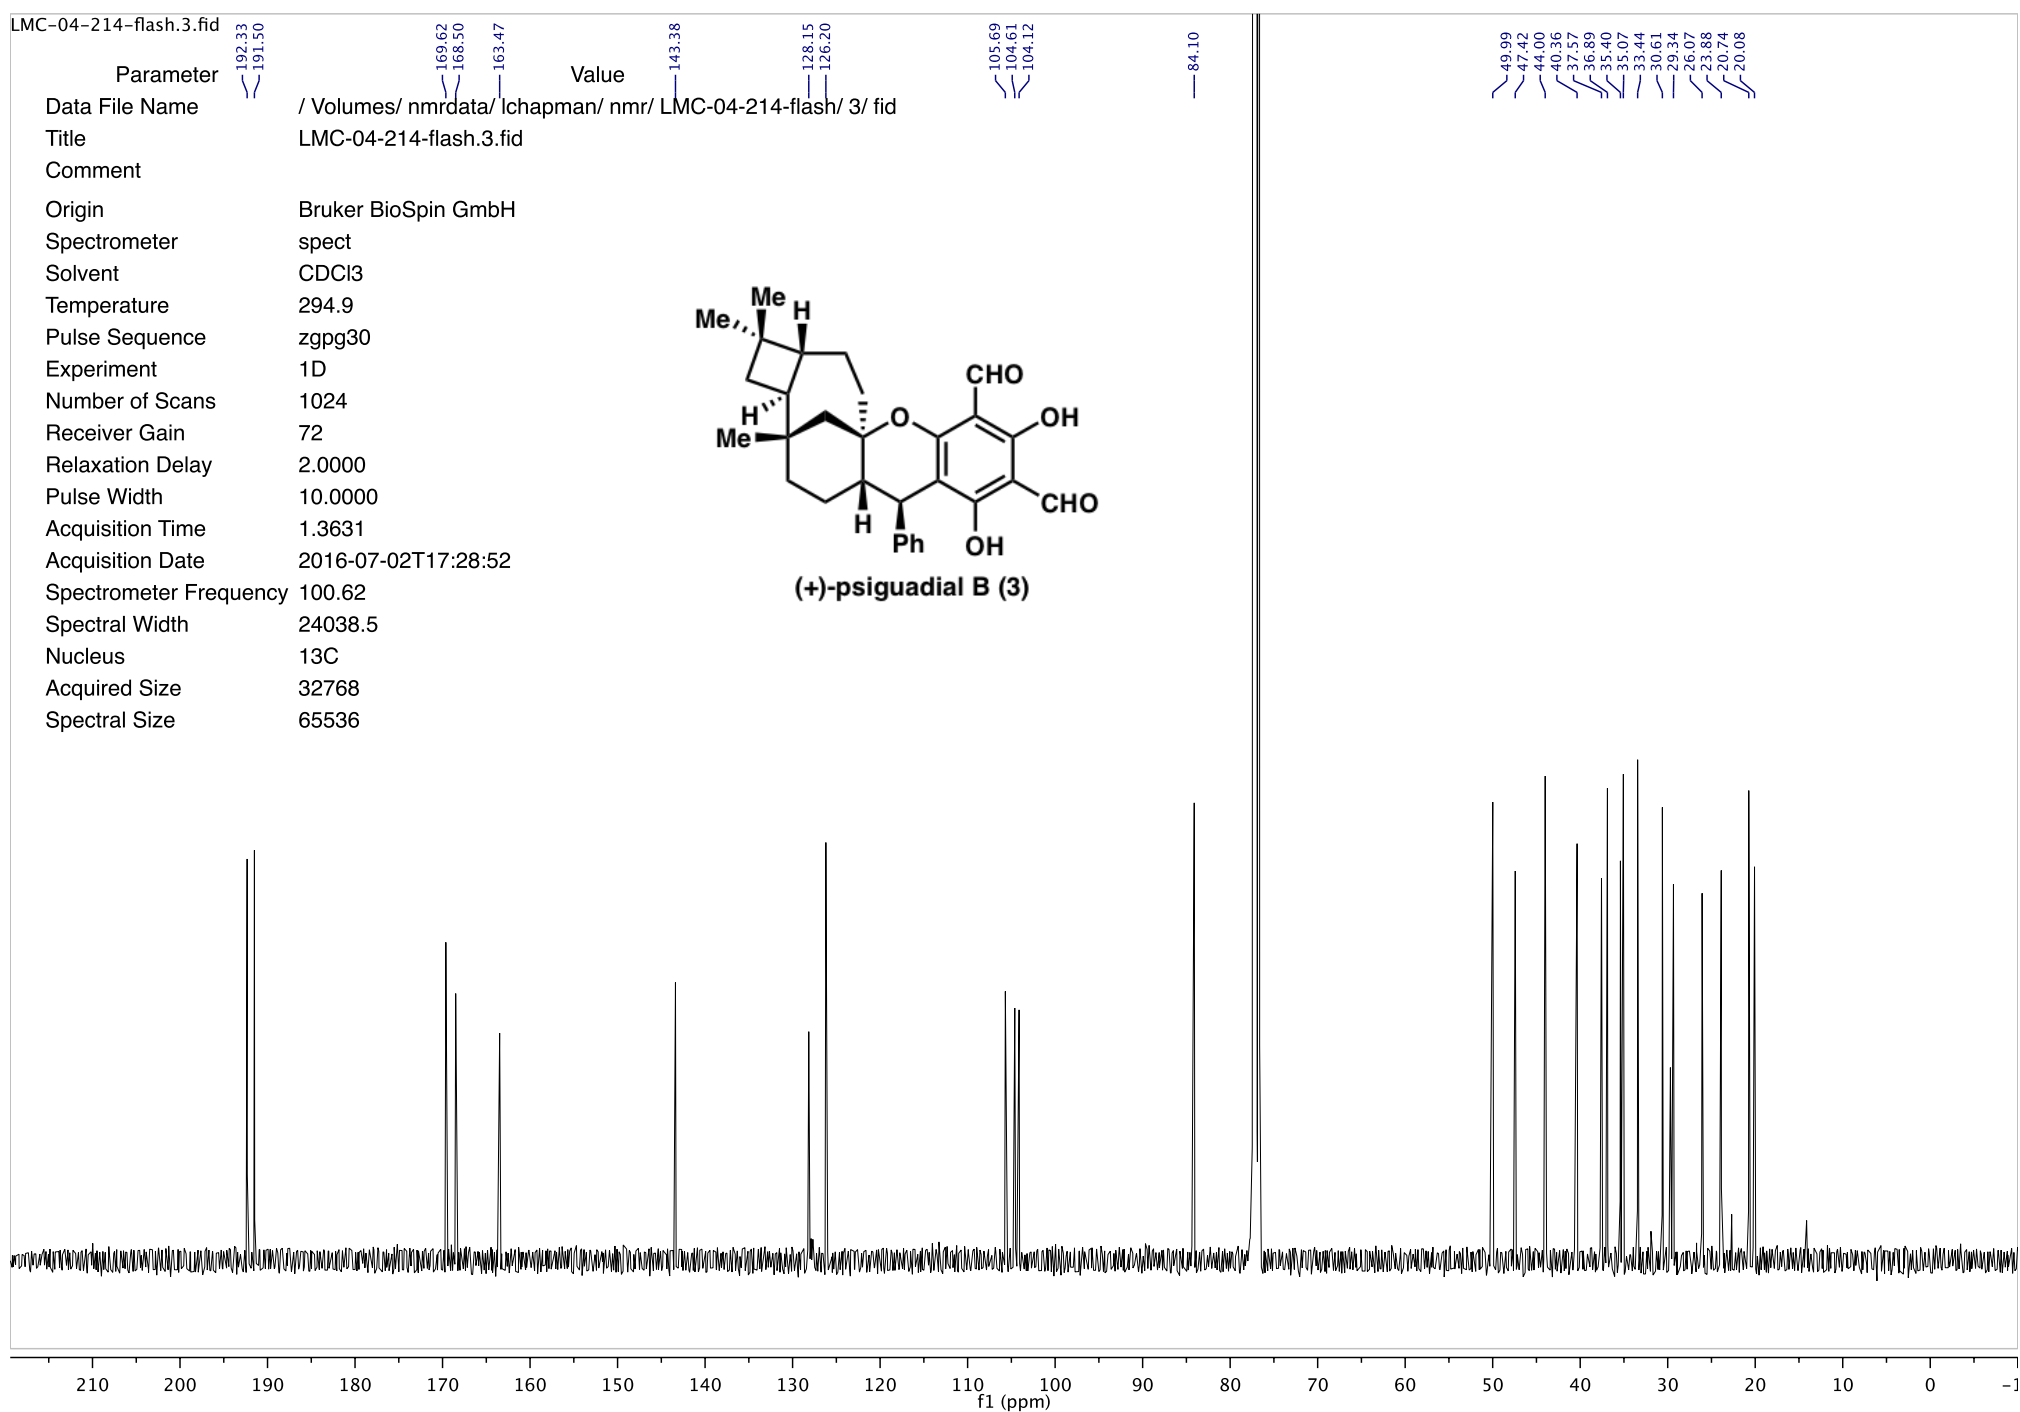

Supplement: NIHMS969614-supplement-Supp_Info.pdf [file NIHMS969614-supplement-Supp_Info.pdf]
